# Supplementary material for: Systematic evaluation of pre-analytical variables on synovial fluid metabolomic profiles using GC-ToF-MS and UHPLC-MS
Source: Royal Society of Chemistry journal article supplement (doi:10.1039/d5an00943j), 2026-01-01
Supplement: d5an00943j1.xlsx [file d5an00943j1.xlsx]

## Sheet: GC-MS
Metabolite	Contrast	Log2FC	p.value
Unknown	1 in 10 - Control	1.14892	0.312845
	1 in 20 - Control	1.95472	0.0134605
	1 in 5 - Control	0.575067	0.851423
	(2x F/T) - Control	-0.222972	0.991596
	(3x F/T) - Control	0.0811829	0.99968
	Blood Stain - Control	0.0398466	0.999969
	Hyaluronidase - Control	0.170137	0.996467
Unknown	1 in 10 - Control	0.602197	0.831408
	1 in 20 - Control	1.00498	0.445476
	1 in 5 - Control	-0.00577673	1
	(2x F/T) - Control	0.482215	0.909882
	(3x F/T) - Control	-1.51545	0.0944269
	Blood Stain - Control	-0.355597	0.963762
	Hyaluronidase - Control	-0.0628309	0.999861
Glyoxylic acid (1MEOX) (1TMS)	1 in 10 - Control	1.70136	0.0441727
	1 in 20 - Control	2.0983	0.00636687
	1 in 5 - Control	0.243001	0.988955
	(2x F/T) - Control	-0.201915	0.993877
	(3x F/T) - Control	-0.921824	0.529407
	Blood Stain - Control	-0.793725	0.660021
	Hyaluronidase - Control	-1.11426	0.342776
Unknown	1 in 10 - Control	2.56209	0.0003976
	1 in 20 - Control	3.48863	3.346276152838e-07
	1 in 5 - Control	1.97896	0.0119069
	(2x F/T) - Control	0.390636	0.951767
	(3x F/T) - Control	0.0510804	0.99993
	Blood Stain - Control	-0.5041	0.897546
	Hyaluronidase - Control	0.0324298	0.999984
Hexadecane, 2,6,10-trimethyl-	1 in 10 - Control	2.99688	1.83979285499625e-05
	1 in 20 - Control	3.47133	3.88936747919288e-07
	1 in 5 - Control	2.2298	0.00306223
	(2x F/T) - Control	1.48231	0.107004
	(3x F/T) - Control	1.17062	0.294862
	Blood Stain - Control	-0.445921	0.92835
	Hyaluronidase - Control	-0.375396	0.957248
Caffeine	1 in 10 - Control	-0.132697	0.998417
	1 in 20 - Control	0.661128	0.783772
	1 in 5 - Control	-0.224822	0.991372
	(2x F/T) - Control	0.599967	0.833101
	(3x F/T) - Control	0.0696366	0.999806
	Blood Stain - Control	-0.250379	0.987859
	Hyaluronidase - Control	0.286346	0.981477
Unknown	1 in 10 - Control	2.02143	0.00956901
	1 in 20 - Control	2.54723	0.000438123
	1 in 5 - Control	1.49241	0.10304
	(2x F/T) - Control	0.274781	0.983723
	(3x F/T) - Control	-0.305385	0.977354
	Blood Stain - Control	-0.299477	0.978691
	Hyaluronidase - Control	-0.127756	0.998601
Unknown	1 in 10 - Control	1.21995	0.256277
	1 in 20 - Control	1.58862	0.0708453
	1 in 5 - Control	0.869828	0.582817
	(2x F/T) - Control	0.970449	0.479931
	(3x F/T) - Control	1.21467	0.260256
	Blood Stain - Control	1.22027	0.256037
	Hyaluronidase - Control	1.90732	0.0170326
Inositol. myo- (6TMS)	1 in 10 - Control	0.0394225	0.99997
	1 in 20 - Control	0.314389	0.975213
	1 in 5 - Control	0.343083	0.967534
	(2x F/T) - Control	0.436733	0.932633
	(3x F/T) - Control	-0.0152122	0.999999
	Blood Stain - Control	0.0490753	0.999938
	Hyaluronidase - Control	0.199436	0.994114
Unknown	1 in 10 - Control	2.39945	0.0011172
	1 in 20 - Control	3.14907	5.64973293148974e-06
	1 in 5 - Control	1.82751	0.0249766
	(2x F/T) - Control	0.196014	0.994432
	(3x F/T) - Control	0.266723	0.985178
	Blood Stain - Control	2.14894	0.00482805
	Hyaluronidase - Control	0.363723	0.96117
Unknown	1 in 10 - Control	1.86924	0.0204888
	1 in 20 - Control	2.35951	0.00142563
	1 in 5 - Control	1.35335	0.168762
	(2x F/T) - Control	1.28988	0.207306
	(3x F/T) - Control	-0.368164	0.959706
	Blood Stain - Control	0.949729	0.500909
	Hyaluronidase - Control	0.200071	0.994054
(Z)-8-(but-3-yn-1-yl)-5-(pent-2-en-4-yn-1-yl)octahydroindolizine	1 in 10 - Control	4.87024	3.37507799486048e-14
	1 in 20 - Control	4.58946	5.295763827462e-12
	1 in 5 - Control	2.56149	0.000399148
	(2x F/T) - Control	2.32864	0.00171665
	(3x F/T) - Control	1.28606	0.209806
	Blood Stain - Control	1.05149	0.400401
	Hyaluronidase - Control	3.699	5.09272373161451e-08
3,4-Methylenedioxy-.alpha.-Pyrrolidinohexanophenone	1 in 10 - Control	1.53008	0.0892656
	1 in 20 - Control	0.272464	0.98415
	1 in 5 - Control	1.05799	0.394241
	(2x F/T) - Control	0.575909	0.850821
	(3x F/T) - Control	0.0046867	1
	Blood Stain - Control	-0.21632	0.992369
	Hyaluronidase - Control	0.168535	0.996573
1,3-Dichloro-1,3-bis(norbornadien-2-yl)-1,3-bis(3-trimethylsilylpropyl)disiloxane	1 in 10 - Control	1.76647	0.03309
	1 in 20 - Control	2.55665	0.000411997
	1 in 5 - Control	1.0842	0.369857
	(2x F/T) - Control	0.544161	0.872643
	(3x F/T) - Control	0.0814471	0.999677
	Blood Stain - Control	0.102585	0.999314
	Hyaluronidase - Control	1.12894	0.329917
Unknown	1 in 10 - Control	2.54226	0.000452522
	1 in 20 - Control	3.18491	4.24511385643811e-06
	1 in 5 - Control	1.9086	0.0169256
	(2x F/T) - Control	0.811028	0.642697
	(3x F/T) - Control	0.332845	0.970427
	Blood Stain - Control	0.461632	0.92066
	Hyaluronidase - Control	-0.0859967	0.999614
d-Xylitol, 1,3,5-trideoxy-3-nitro-, 4-(2,2-dimethylpropanoate)	1 in 10 - Control	2.50218	0.000586106
	1 in 20 - Control	2.00059	0.0106587
	1 in 5 - Control	0.857327	0.595637
	(2x F/T) - Control	-0.419834	0.9401
	(3x F/T) - Control	-0.487127	0.907192
	Blood Stain - Control	-0.456493	0.923227
	Hyaluronidase - Control	-0.552881	0.86683
Unknown	1 in 10 - Control	1.57856	0.0737674
	1 in 20 - Control	2.29619	0.00208149
	1 in 5 - Control	1.00304	0.447384
	(2x F/T) - Control	-0.370005	0.959089
	(3x F/T) - Control	-0.625341	0.813354
	Blood Stain - Control	-0.918922	0.532382
	Hyaluronidase - Control	-1.02863	0.422336
Unknown	1 in 10 - Control	0.980049	0.470281
	1 in 20 - Control	1.69344	0.0457161
	1 in 5 - Control	0.508997	0.894663
	(2x F/T) - Control	-0.495734	0.902368
	(3x F/T) - Control	-0.467449	0.917695
	Blood Stain - Control	-0.559636	0.862232
	Hyaluronidase - Control	-0.491508	0.904754
Unknown	1 in 10 - Control	0.528194	0.882926
	1 in 20 - Control	1.93596	0.0147845
	1 in 5 - Control	0.0704354	0.999799
	(2x F/T) - Control	0.437247	0.932398
	(3x F/T) - Control	0.0338659	0.999982
	Blood Stain - Control	0.28669	0.981407
	Hyaluronidase - Control	0.138176	0.998196
Unknown	1 in 10 - Control	2.14067	0.0050534
	1 in 20 - Control	3.00169	1.7738991325178e-05
	1 in 5 - Control	1.68144	0.0481413
	(2x F/T) - Control	1.5308	0.089018
	(3x F/T) - Control	0.00606873	1
	Blood Stain - Control	0.498144	0.900993
	Hyaluronidase - Control	0.458444	0.922258
Unknown	1 in 10 - Control	0.246523	0.98844
	1 in 20 - Control	0.639547	0.801845
	1 in 5 - Control	0.0670731	0.999828
	(2x F/T) - Control	-0.145283	0.997878
	(3x F/T) - Control	-0.00843217	1
	Blood Stain - Control	-0.681941	0.765705
	Hyaluronidase - Control	-0.201275	0.993939
3-Methyl-2-oxopentanoic-acid_2_1MeOX_1TMS	1 in 10 - Control	0.602285	0.831341
	1 in 20 - Control	1.28466	0.210725
	1 in 5 - Control	0.356975	0.96333
	(2x F/T) - Control	-0.407605	0.945176
	(3x F/T) - Control	-0.106284	0.99923
	Blood Stain - Control	-0.337899	0.96902
	Hyaluronidase - Control	-0.427109	0.93695
Ketone, methyl 2,2,3-trimethylcyclopentyl	1 in 10 - Control	2.47467	0.000698387
	1 in 20 - Control	3.20583	3.58792207677538e-06
	1 in 5 - Control	1.73706	0.0377559
	(2x F/T) - Control	0.16372	0.996878
	(3x F/T) - Control	0.110701	0.999121
	Blood Stain - Control	0.144873	0.997897
	Hyaluronidase - Control	1.01517	0.435453
5-Methyl-N-[2-(trifluoromethyl)phenyl]-3-isoxazolecarboxamide, N-trifluoroacetyl-	1 in 10 - Control	2.0184	0.0097211
	1 in 20 - Control	3.05198	1.20731e-05
	1 in 5 - Control	2.78804	8.5136e-05
	(2x F/T) - Control	1.40955	0.139221
	(3x F/T) - Control	-0.153519	0.997464
	Blood Stain - Control	1.28208	0.212428
	Hyaluronidase - Control	1.25359	0.231869
.alpha.-N-Normethadol	1 in 10 - Control	-0.0947773	0.99947
	1 in 20 - Control	0.00062031	1
	1 in 5 - Control	-0.252608	0.987514
	(2x F/T) - Control	-0.250501	0.98784
	(3x F/T) - Control	-0.0622981	0.999865
	Blood Stain - Control	-0.39195	0.951275
	Hyaluronidase - Control	-0.179223	0.995823
[2-(Benzo[4,5]thiazolo[2,3-c][1,2,4]triazol-3-ylsulfanyl)ethyl](dimethyl)amine	1 in 10 - Control	-0.182629	0.995562
	1 in 20 - Control	-0.144354	0.997921
	1 in 5 - Control	-0.259347	0.986431
	(2x F/T) - Control	-0.141704	0.998042
	(3x F/T) - Control	-0.0135763	0.999999
	Blood Stain - Control	-0.578754	0.848777
	Hyaluronidase - Control	-0.207381	0.993331
10-Methyl-E-11-tridecen-1-ol propionate	1 in 10 - Control	1.65466	0.0539536
	1 in 20 - Control	2.70573	0.000151377
	1 in 5 - Control	0.899209	0.552624
	(2x F/T) - Control	1.02804	0.422902
	(3x F/T) - Control	0.338609	0.968819
	Blood Stain - Control	0.720136	0.731077
	Hyaluronidase - Control	0.401693	0.947531
beta-D-Allose (5TMS)	1 in 10 - Control	1.7418	0.036968
	1 in 20 - Control	2.10909	0.00600547
	1 in 5 - Control	1.28448	0.210844
	(2x F/T) - Control	-0.418762	0.940556
	(3x F/T) - Control	-0.419956	0.940048
	Blood Stain - Control	-0.0997509	0.999374
	Hyaluronidase - Control	1.89522	0.0180694
Nonadecanoic acid	1 in 10 - Control	0.264083	0.985635
	1 in 20 - Control	1.24545	0.237633
	1 in 5 - Control	0.118434	0.998906
	(2x F/T) - Control	0.595199	0.836691
	(3x F/T) - Control	-0.0211084	0.999996
	Blood Stain - Control	0.42049	0.93982
	Hyaluronidase - Control	0.130077	0.998516
Unknown	1 in 10 - Control	1.96676	0.0126673
	1 in 20 - Control	2.11376	0.00585513
	1 in 5 - Control	1.25252	0.232625
	(2x F/T) - Control	-0.458451	0.922254
	(3x F/T) - Control	-0.234009	0.9902
	Blood Stain - Control	3.61394	1.10352920357215e-07
	Hyaluronidase - Control	-0.179691	0.995787
Unknown	1 in 10 - Control	1.82172	0.0256629
	1 in 20 - Control	1.76993	0.032576
	1 in 5 - Control	0.0763149	0.999738
	(2x F/T) - Control	-0.760558	0.692645
	(3x F/T) - Control	-1.47395	0.110376
	Blood Stain - Control	0.212987	0.992738
	Hyaluronidase - Control	-0.658147	0.786309
Valeric acid. 2-oxo- (1MEOX) (1TMS) MP	1 in 10 - Control	2.69532	0.000162629
	1 in 20 - Control	1.24568	0.237467
	1 in 5 - Control	0.546317	0.871218
	(2x F/T) - Control	0.00901523	1
	(3x F/T) - Control	-0.356164	0.963585
	Blood Stain - Control	-0.517897	0.889306
	Hyaluronidase - Control	0.0759612	0.999742
Hexadecenoic acid. 9-(Z)- (1TMS)	1 in 10 - Control	1.71076	0.042399
	1 in 20 - Control	2.07452	0.00723398
	1 in 5 - Control	1.02461	0.426238
	(2x F/T) - Control	-0.461391	0.920782
	(3x F/T) - Control	0.0596053	0.999883
	Blood Stain - Control	0.0476857	0.999944
	Hyaluronidase - Control	-0.125681	0.998673
Pentadecafluorooctanoic acid, undecyl ester	1 in 10 - Control	2.39628	0.00113917
	1 in 20 - Control	3.12878	6.63331174677317e-06
	1 in 5 - Control	1.6748	0.0495307
	(2x F/T) - Control	0.116369	0.998966
	(3x F/T) - Control	0.106932	0.999215
	Blood Stain - Control	0.786985	0.666718
	Hyaluronidase - Control	0.125142	0.998691
Unknown	1 in 10 - Control	1.69619	0.0451755
	1 in 20 - Control	2.19704	0.0036898
	1 in 5 - Control	1.07491	0.378417
	(2x F/T) - Control	0.159876	0.997109
	(3x F/T) - Control	-0.0446366	0.999955
	Blood Stain - Control	0.107551	0.9992
	Hyaluronidase - Control	0.927054	0.52405
Unknown	1 in 10 - Control	2.5755	0.000364078
	1 in 20 - Control	2.9987	1.81461753308021e-05
	1 in 5 - Control	1.86808	0.0206038
	(2x F/T) - Control	-0.282819	0.982182
	(3x F/T) - Control	0.133919	0.99837
	Blood Stain - Control	1.56333	0.0783799
	Hyaluronidase - Control	-0.571726	0.853799
Unknown	1 in 10 - Control	1.69626	0.045162
	1 in 20 - Control	2.42515	0.000952981
	1 in 5 - Control	0.877081	0.575369
	(2x F/T) - Control	0.378206	0.956268
	(3x F/T) - Control	0.633755	0.806576
	Blood Stain - Control	0.287063	0.981331
	Hyaluronidase - Control	0.451191	0.925822
Unknown	1 in 10 - Control	2.50754	0.000566298
	1 in 20 - Control	3.61256	1.11721807805054e-07
	1 in 5 - Control	1.66874	0.0508285
	(2x F/T) - Control	0.315501	0.97494
	(3x F/T) - Control	1.46392	0.114532
	Blood Stain - Control	0.468786	0.917004
	Hyaluronidase - Control	1.42951	0.129727
Unknown	1 in 10 - Control	0.864612	0.588169
	1 in 20 - Control	1.53663	0.0870281
	1 in 5 - Control	0.96374	0.486703
	(2x F/T) - Control	-0.231148	0.990576
	(3x F/T) - Control	-0.89169	0.560353
	Blood Stain - Control	0.101859	0.99933
	Hyaluronidase - Control	-1.43812	0.125789
NA	1 in 10 - Control	1.78325	0.0306583
	1 in 20 - Control	2.50465	0.000576904
	1 in 5 - Control	1.23297	0.246646
	(2x F/T) - Control	0.182109	0.995603
	(3x F/T) - Control	0.0832392	0.999653
	Blood Stain - Control	0.580347	0.847627
	Hyaluronidase - Control	1.68136	0.0481586
Unknown	1 in 10 - Control	2.55518	0.000415963
	1 in 20 - Control	1.8162	0.0263336
	1 in 5 - Control	2.07078	0.00737963
	(2x F/T) - Control	-1.47954	0.108114
	(3x F/T) - Control	-0.496277	0.902059
	Blood Stain - Control	-0.539457	0.875721
	Hyaluronidase - Control	-0.841665	0.611644
Cholest-4-ene, 3.beta.-(methoxymethoxy)-	1 in 10 - Control	1.49244	0.103027
	1 in 20 - Control	2.7385	0.000120612
	1 in 5 - Control	1.06902	0.383896
	(2x F/T) - Control	0.978112	0.472224
	(3x F/T) - Control	0.277731	0.983168
	Blood Stain - Control	0.408607	0.94477
	Hyaluronidase - Control	-0.0708131	0.999795
[6255] maltose 1 [24.702]	1 in 10 - Control	1.61202	0.0644179
	1 in 20 - Control	1.35536	0.16763
	1 in 5 - Control	0.22069	0.991867
	(2x F/T) - Control	-0.877118	0.57533
	(3x F/T) - Control	-0.106046	0.999236
	Blood Stain - Control	0.218778	0.992089
	Hyaluronidase - Control	0.805654	0.648096
Unknown	1 in 10 - Control	3.43954	5.11801590663552e-07
	1 in 20 - Control	4.24415	2.43587594539463e-10
	1 in 5 - Control	3.45516	4.47359821298399e-07
	(2x F/T) - Control	1.91924	0.0160624
	(3x F/T) - Control	2.23089	0.0030432
	Blood Stain - Control	2.69717	0.000160564
	Hyaluronidase - Control	0.82732	0.626235
Unknown	1 in 10 - Control	1.91977	0.0160202
	1 in 20 - Control	1.38002	0.154216
	1 in 5 - Control	1.14123	0.319361
	(2x F/T) - Control	-1.1403	0.320148
	(3x F/T) - Control	-0.195267	0.994499
	Blood Stain - Control	-0.531661	0.880733
	Hyaluronidase - Control	2.27613	0.00234174
Unknown	1 in 10 - Control	1.62486	0.0611022
	1 in 20 - Control	3.37141	9.14638618176866e-07
	1 in 5 - Control	1.10418	0.351744
	(2x F/T) - Control	1.06772	0.385108
	(3x F/T) - Control	-0.0610099	0.999874
	Blood Stain - Control	0.125328	0.998685
	Hyaluronidase - Control	0.204237	0.993649
Unknown	1 in 10 - Control	1.17777	0.289068
	1 in 20 - Control	1.74612	0.0362623
	1 in 5 - Control	0.386585	0.953264
	(2x F/T) - Control	0.335127	0.969797
	(3x F/T) - Control	-0.290099	0.980706
	Blood Stain - Control	-0.568962	0.85575
	Hyaluronidase - Control	0.449798	0.926496
4-Fluoro-DL-tryptophan, 2TMS	1 in 10 - Control	2.05305	0.00810755
	1 in 20 - Control	2.77329	9.44961915358977e-05
	1 in 5 - Control	1.55009	0.082578
	(2x F/T) - Control	0.438479	0.931832
	(3x F/T) - Control	0.987335	0.462991
	Blood Stain - Control	2.67476	0.000187196
	Hyaluronidase - Control	1.6766	0.049151
Myo-Inositol, 5TMS derivative	1 in 10 - Control	1.92348	0.0157295
	1 in 20 - Control	1.04647	0.405178
	1 in 5 - Control	1.74516	0.0364179
	(2x F/T) - Control	1.79734	0.0287381
	(3x F/T) - Control	0.590768	0.839994
	Blood Stain - Control	1.63911	0.0575892
	Hyaluronidase - Control	1.72148	0.04045
Unknown	1 in 10 - Control	0.824519	0.629075
	1 in 20 - Control	1.32986	0.182378
	1 in 5 - Control	0.471716	0.915479
	(2x F/T) - Control	0.207255	0.993344
	(3x F/T) - Control	-0.0734375	0.999769
	Blood Stain - Control	0.377329	0.956576
	Hyaluronidase - Control	0.167762	0.996623

## Sheet: GC-MS 2
Metabolite	Contrast	Log2FC	p.value
Unknown	Bead Beating - Control	-0.46181	0.648463
Xylitol, 5TMS	Bead Beating - Control	1.91591	0.0593127
Unknown	Bead Beating - Control	0.556218	0.582969
Unknown	Bead Beating - Control	-0.201603	0.842223
Phenyl .beta.-D-glucopyranoside, 4TMS	Bead Beating - Control	1.07567	0.288667
Silane, diethylethoxypentyloxy-	Bead Beating - Control	0.565606	0.576629
Unknown	Bead Beating - Control	-0.733462	0.469143
Unknown	Bead Beating - Control	-0.273967	0.786782
Unknown	Bead Beating - Control	0.298519	0.768201
Unknown	Bead Beating - Control	-0.410823	0.685051
Unknown	Bead Beating - Control	0.123728	0.902769
Unknown	Bead Beating - Control	-0.768203	0.448375
Xylitol, 5TMS	Bead Beating - Control	1.36012	0.17997
Unknown	Bead Beating - Control	0.50142	0.620611
Unknown	Bead Beating - Control	-1.05443	0.298275
Unknown	Bead Beating - Control	-0.406236	0.688381
3,7-dioxa-2,8-disilanonane, 2,2,5,5,8,8-hexamethyl-4-(1-methylethyl)-	Bead Beating - Control	0.978954	0.334138
Unknown	Bead Beating - Control	-0.152322	0.880452
Unknown	Bead Beating - Control	-0.417551	0.680178
1-Decene, 3,4-dimethyl-	Bead Beating - Control	0.452455	0.655116
Unknown	Bead Beating - Control	-0.274372	0.786474
Unknown	Bead Beating - Control	-1.1367	0.262234
Unknown	Bead Beating - Control	0.319773	0.752223
Unknown	Bead Beating - Control	-0.517	0.6098
Unknown	Bead Beating - Control	-0.477412	0.63743
Unknown	Bead Beating - Control	0.395168	0.696442
Unknown	Bead Beating - Control	0.286076	0.777602
Glucose TMS_CMR	Bead Beating - Control	1.18789	0.241401
[656894] isopropyl beta-D-1-thiogalactopyranoside [19.097]	Bead Beating - Control	0.742776	0.463523
Aspartic acid. N-(aminocarbonyl)- (3TMS)	Bead Beating - Control	0.945174	0.351059
Unknown	Bead Beating - Control	0.386242	0.702967
Unknown	Bead Beating - Control	0.12001	0.905677
Phenol (1TMS)	Bead Beating - Control	0.338693	0.738089
NA	Bead Beating - Control	1.19581	0.238286
Fructose (1MEOX) (5TMS) MP	Bead Beating - Control	0.119288	0.906241
Unknown	Bead Beating - Control	-0.610698	0.546643
Unknown	Bead Beating - Control	0.57593	0.569695
Unknown	Bead Beating - Control	-0.205749	0.839022
Galactonic acid-1.4-lactone (4TMS)	Bead Beating - Control	1.03116	0.309046
Unknown	Bead Beating - Control	-0.0497646	0.960811
NA180001 (classified unknown)	Bead Beating - Control	0.487504	0.630336
Unknown	Bead Beating - Control	1.36332	0.178951
4-(3,5-Difluorophenyl)aniline, N-acetyl-	Bead Beating - Control	0.93907	0.354174
[219984] 1,5-anhydro-D-sorbitol [16.967]	Bead Beating - Control	0.959207	0.343965
Unknown	Bead Beating - Control	1.3831	0.172748
Butanal, 2,3,4-tris[(trimethylsilyl)oxy]-3-[[(trimethylsilyl)oxy]methyl]-, O-methyloxime, (S)-	Bead Beating - Control	1.18667	0.241882
Erythritol (4TMS)	Bead Beating - Control	0.215134	0.831787
Xylitol (5TMS)	Bead Beating - Control	0.592479	0.558664
Unknown	Bead Beating - Control	0.542257	0.592457
NA196028 (classified unknown)	Bead Beating - Control	0.527163	0.602794
Galactitol (6TMS)	Bead Beating - Control	0.844002	0.404932
Gulonic acid-1.4-lactone (4TMS)	Bead Beating - Control	0.842458	0.405791
Unknown	Bead Beating - Control	0.124689	0.902018
Adonitol, 5TMS	Bead Beating - Control	0.678658	0.502966
Unknown	Bead Beating - Control	-0.601657	0.552592
Ribitol (5TMS)	Bead Beating - Control	1.15114	0.256236
Unknown	Bead Beating - Control	0.757599	0.454657
Benzylalcohol (1TMS)	Bead Beating - Control	0.529537	0.601163
Galactonic acid (6TMS)	Bead Beating - Control	0.216712	0.830572
Unknown	Bead Beating - Control	-0.565813	0.57649
Unknown	Bead Beating - Control	1.29158	0.20285
(5R,6R,7R,8R)-2,2,11,11-Tetramethyl-6,8-bis((trimethylsilyl)oxy)-3,10-dioxa-2,11-disiladodecane-5,7-diol	Bead Beating - Control	1.35223	0.182501
Unknown	Bead Beating - Control	-1.35897	0.180339
Unknown	Bead Beating - Control	-0.846542	0.403521
Hexadecenoic acid. 9-(Z)- (1TMS)	Bead Beating - Control	1.09275	0.281095
Unknown	Bead Beating - Control	-1.14076	0.260537
Unknown	Bead Beating - Control	-0.308298	0.760836
Talose, 5TMS derivative	Bead Beating - Control	-0.0882567	0.930559
Unknown	Bead Beating - Control	0.849876	0.401675
Unknown	Bead Beating - Control	0.440124	0.663927
Unknown	Bead Beating - Control	-0.530251	0.600673
Unknown	Bead Beating - Control	-0.274748	0.786189
4-Butylbenzoic acid, pentafluorophenyl ester	Bead Beating - Control	-1.63069	0.108167
2,4,6-Tri-tert-butylphenol, trimethylsilyl ether	Bead Beating - Control	1.53235	0.131042
Inosose-2, 1,3,4,5,6-pentakis-O-(trimethylsilyl)-, myo-	Bead Beating - Control	-0.385675	0.703382
5-Benzyl-1,3-thiazol-2-amine, 2TMS	Bead Beating - Control	1.53204	0.131121
Unknown	Bead Beating - Control	-0.029161	0.97703
[16212335] loganin [25.963]	Bead Beating - Control	0.435822	0.667012
Unknown	Bead Beating - Control	0.234153	0.81717
Unknown	Bead Beating - Control	-0.309895	0.759636
Unknown	Bead Beating - Control	0.683986	0.499622
Glycerol (3TMS)	Bead Beating - Control	2.02564	0.0462453
Unknown	Bead Beating - Control	-0.53044	0.600543
Unknown	Bead Beating - Control	-0.343466	0.734537
Unknown	Bead Beating - Control	-0.3847	0.704096
Unknown	Bead Beating - Control	-0.112233	0.911763
Heptafluorobutyric acid, hexadecyl ester	Bead Beating - Control	0.221519	0.826873
Mannitol (6TMS)	Bead Beating - Control	1.15722	0.25374
Unknown	Bead Beating - Control	-0.614115	0.544402
Inositol. myo- (6TMS)	Bead Beating - Control	-0.423785	0.675675
Unknown	Bead Beating - Control	-0.0427342	0.966343
Unknown	Bead Beating - Control	-0.855529	0.398554
Unknown	Bead Beating - Control	-0.68314	0.500152
Unknown	Bead Beating - Control	-0.401264	0.691998
NA	Bead Beating - Control	-0.336199	0.739947
Unknown#bth-pae-010	Bead Beating - Control	1.48518	0.143276
Unknown	Bead Beating - Control	-0.622595	0.538862
similar to Inositol (6TMS)	Bead Beating - Control	-0.26467	0.79385
D200302	Bead Beating - Control	-0.21561	0.83142
Unknown	Bead Beating - Control	-0.701926	0.48845
D230150	Bead Beating - Control	-0.64366	0.525225
Unknown	Bead Beating - Control	-0.775795	0.443907
Unknown	Bead Beating - Control	-0.0680856	0.946402
Idose (1MEOX) (5TMS) BP	Bead Beating - Control	0.0533715	0.957973
Unknown	Bead Beating - Control	-1.35169	0.182674
Unknown	Bead Beating - Control	-0.204534	0.83996
[440658] melibiose 2 [25.784]	Bead Beating - Control	0.0286504	0.977432
Unknown	Bead Beating - Control	1.14722	0.257855
1,3,4-Thiadiazole-2-thiol	Bead Beating - Control	0.929401	0.359144
Xylulose (4TMS)	Bead Beating - Control	0.584788	0.563778
Unknown	Bead Beating - Control	0.662295	0.51331
Unknown	Bead Beating - Control	0.157312	0.876567
beta-D-Allose (5TMS)	Bead Beating - Control	-0.61807	0.541815
Butanoic acid. 3-hydroxy- (2TMS)	Bead Beating - Control	1.54194	0.128659
NA	Bead Beating - Control	0.316359	0.754782
Unknown	Bead Beating - Control	-0.263584	0.794678
Unknown	Bead Beating - Control	-0.476309	0.638208
[439193] isomaltose 1 [25.625]	Bead Beating - Control	0.0415393	0.967284
Unknown	Bead Beating - Control	-1.05927	0.296065
Unknown	Bead Beating - Control	0.19969	0.8437

## Sheet: LIPID (ESI+)
Name	Formula	Group Area: Control (1)	Group Area: 1:5 Dilution (2)	Group Area: 1:10 Dilution (3)	Group Area: 1:20 Dilution (4)	Group Area: 2x F/T (5)	Group Area: 3x F/T (6)	Group Area: Blood Staining (7)	Group Area: Hyaluronidase Treated (8)	Group Area: Bead Beating (9)	Log2 Fold Change: (1) / (2)	Log2 Fold Change: (1) / (3)	Log2 Fold Change: (1) / (4)	Log2 Fold Change: (1) / (5)	Log2 Fold Change: (1) / (6)	Log2 Fold Change: (1) / (7)	Log2 Fold Change: (1) / (8)	Log2 Fold Change: (1) / (9)	P-value: (1) / (2)	P-value: (1) / (3)	P-value: (1) / (4)	P-value: (1) / (5)	P-value: (1) / (6)	P-value: (1) / (7)	P-value: (1) / (8)	P-value: (1) / (9)
		1.43827e+09	3.18592e+08	2.22715e+08	2.15752e+08	6.38883e+08	5.11383e+08	4.92097e+08	1.18938e+09	1.04475e+09	2.17	2.69	2.74	1.17	1.49	1.55	0.27	0.46	0.951379	0.900913	0.922835	0.999995	0.992702	0.999999	1	1
[Similar to: NP-013366; ΔMass: 123.2253 Da]	C36 H80 N10 O2 P2	949894	179030	44787.2	40077.2	1.40467e+06	1.50237e+06	1.47865e+06	897071	496122	2.41	4.41	4.57	-0.56	-0.66	-0.64	0.08	0.94	0.163557	0.0762632	0.0642777	0.987945	0.935885	0.987184	0.999993	0.998222
	C25 H49 N O7	28079.1	23166.3	19849	20702.9	34621.2	27408.7	29614.7	25340.2	1.15331e+06	0.28	0.5	0.44	-0.3	0.03	-0.08	0.15	-5.36	1	1	1	1	1	1	1	1.6949e-06
	C26 H55 N4 O4 P	759277	123222	84489	24826.3	717529	748840	469538	455411	333758	2.62	3.17	4.93	0.08	0.02	0.69	0.74	1.19	0.139752	0.043441	0.0144542	1	1	0.981685	0.865439	0.851725
[Similar to: NP-003749; ΔMass: 119.1892 Da]	C26 H54 N O8 P	1.41941e+06	267078	107564	60070.7	1.76158e+06	1.65831e+06	1.00775e+06	1.17691e+06	549400	2.41	3.72	4.56	-0.31	-0.22	0.49	0.27	1.37	0.0455442	0.0142673	0.00884664	0.942863	0.982568	0.994605	0.999952	0.86831
	C16 H44 N9 O P	296651	230727	244366	254408	230524	223750	232383	219196	271009	0.36	0.28	0.22	0.36	0.41	0.35	0.44	0.13	0.974755	0.81715	0.950898	0.861103	1	0.84771	0.876298	0.962327
	C10 H11 Cl2 N O5 P2	7467.34	6749.82	5436.28	6007.62	8219.03	8598.67	7900.64	7302.46	11316	0.15	0.46	0.31	-0.14	-0.2	-0.08	0.03	-0.6	0.469589	0.462319	0.465838	0.949762	0.873101	0.478708	0.473053	0.309508
[Similar to: NP-007585; ΔMass: 262.3575 Da]	C28 H59 N4 O5 P	952468	221830	161488	34909.8	697375	707782	573226	565491	446217	2.1	2.56	4.77	0.45	0.43	0.73	0.75	1.09	0.126273	0.0226988	0.00640832	0.999994	0.999968	0.881724	0.628428	0.891299
	C15 H17 N	18570.4	20349.3	12702.2	18286.1	18562	21128.1	20275.8	15860.9	85514.1	-0.13	0.55	0.02	0	-0.19	-0.13	0.23	-2.2	0.999972	0.999998	0.999734	0.995067	0.999669	0.999993	1	1
		778448	448852	356145	201978	570932	564296	933949	559980	824198	0.79	1.13	1.95	0.45	0.46	-0.26	0.48	-0.08	0.705348	0.0757851	0.00283986	0.999998	1	0.921553	0.936455	0.999951
	C56 H102 N6 O4	145136	34412.7	40490.5	41857.7	58369.6	41712.4	33593	170448	106466	2.08	1.84	1.79	1.31	1.8	2.11	-0.23	0.45	0.99981	0.999683	0.999808	0.962093	0.838331	1	1	1
	C44 H61 N O13	14653	12872	12134.7	12313.6	15589	12939.5	14547.1	12045.6	993479	0.19	0.27	0.25	-0.09	0.18	0.01	0.28	-6.08	1	1	1	1	1	1	1	1.68572e-06
	C39 H69 N O4 P2	200561	272701	208103	354035	120838	162955	150877	184786	210087	-0.44	-0.05	-0.82	0.73	0.3	0.41	0.12	-0.07	0.616728	0.358008	0.667451	0.187787	0.313899	0.267521	0.851603	0.275205
	C28 H56 N2 O2	111830	38788.2	47564.8	52236	24072.6	34658.5	24111.4	21941.9	86202	1.53	1.23	1.1	2.22	1.69	2.21	2.35	0.38	0.827763	0.999999	1	0.999997	1	0.999951	0.999939	0.996535
[Similar to: 5-[(1S,3aR,4S,6aR)-4-(3,4,5-trimethoxyphenyl)-hexahydrofuro[3,4-c]furan-1-yl]-2H-1,3-benzodioxole; ΔMass: 51.2142 Da]	C21 H50 N5 O3 P	206858	22758.5	16249.3	15134.1	316451	304792	1.99459e+06	161785	131602	3.18	3.67	3.77	-0.61	-0.56	-3.27	0.35	0.65	0.904855	0.839599	0.831986	0.907284	0.950338	1.84308e-12	0.999996	0.999136
	C15 H33 N O2	20329.3	19407.8	6271.82	21389.7	19425.4	12035.6	16936.4	8017.72	35773.7	0.07	1.7	-0.07	0.07	0.76	0.26	1.34	-0.82	0.755746	0.741007	0.764153	0.753397	0.999999	0.751825	0.706396	0.754973
	C53 H93 N5 O14	738168	198958	100387	50627.2	198161	220514	203713	833984	480635	1.89	2.88	3.87	1.9	1.74	1.86	-0.18	0.62	0.00930484	0.00126921	0.000346624	0.025132	0.0457927	0.0175957	0.75137	0.858776
	C26 H46 N2 O5	12080.7	19090	20654.8	22912	11652.9	11915.4	12016.8	11093.7	1.2244e+06	-0.66	-0.77	-0.92	0.05	0.02	0.01	0.12	-6.66	1	1	1	1	1	1	1	1.1362e-05
	C40 H81 N O2	188686	97236.5	64008.3	69250.8	141467	191984	679687	547255	317078	0.96	1.56	1.45	0.42	-0.03	-1.85	-1.54	-0.75	0.886917	0.53683	0.548868	0.988096	0.999672	0.0656444	0.910122	0.999972
	C43 H69 N3 O5 S	372259	369004	300109	238791	276267	286544	240165	297341	440247	0.01	0.31	0.64	0.43	0.38	0.63	0.32	-0.24	0.999988	0.995247	0.991115	0.974501	0.995986	0.979982	0.997458	0.786324
[Similar to: NP-003749; ΔMass: -237.1050 Da]		1.18994e+06	261849	109864	59693	1.91468e+06	1.77741e+06	1.20684e+06	1.26387e+06	799574	2.18	3.44	4.32	-0.69	-0.58	-0.02	-0.09	0.57	0.00201393	0.000415768	0.000175985	0.336862	0.434639	1	0.999961	0.523662
	C34 H65 N O2	562970	159865	100931	46613.3	467096	658423	846141	836479	386100	1.82	2.48	3.59	0.27	-0.23	-0.59	-0.57	0.54	0.162515	0.108952	0.0339155	0.999645	0.999995	0.991917	0.980306	0.997457
[Similar to: 2,6-Di-tert-butyl-1,4-benzoquinone; ΔMass: 474.2887 Da]	C42 H63 O6 P	259667	259012	178929	172242	149186	166397	200869	164430	310665	0	0.54	0.59	0.8	0.64	0.37	0.66	-0.26	0.999959	0.97537	0.993922	0.945095	0.992085	0.982313	0.979524	0.685889
	C33 H50 O7 P2	205188	139244	166219	162087	295035	218521	430785	299599	180449	0.56	0.3	0.34	-0.52	-0.09	-1.07	-0.55	0.19	0.989403	0.989752	0.996212	0.999782	0.999999	0.999831	0.999975	0.999906
(1Z,2S)-N-[(2S,3R,4E,8E)-1,3-Dihydroxy-4,8-octadecadien-2-yl]-2-hydroxypentadecanimidic acid	C33 H63 N O4	1.20492e+06	164952	79636.4	62166	1.37577e+06	1.26531e+06	875006	992699	614008	2.87	3.92	4.28	-0.19	-0.07	0.46	0.28	0.97	0.310824	0.175804	0.146783	1	0.999854	1	1	0.972762
	C37 H71 N O12	217208	259113	195718	309405	120261	148862	123472	166260	242148	-0.25	0.15	-0.51	0.85	0.55	0.81	0.39	-0.16	0.586436	0.275692	0.582813	0.186446	0.227887	0.198093	0.731529	0.259241
	C35 H73 O2 P3	417487	113256	78525.9	32313.4	230234	252504	191430	399966	280559	1.88	2.41	3.69	0.86	0.73	1.12	0.06	0.57	0.861733	0.615187	0.5424	0.999927	0.999943	0.975348	0.99976	0.994745
Amide C22	C22 H45 N O	88863.4	58945.8	138519	280531	72236.5	85966.9	76446	31555.2	76344.4	0.59	-0.64	-1.66	0.3	0.05	0.22	1.49	0.22	1	0.999936	0.979948	1	0.999999	0.999996	0.842998	1
	C26 H55 N O15	115251	68766.3	77134.3	74939.5	35877.6	47754.7	87595.8	33632.7	44354.3	0.75	0.58	0.62	1.68	1.27	0.4	1.78	1.38	0.860869	0.876544	0.883528	0.892625	1	0.913946	0.701132	0.407075
	C42 H83 N O8 P2	45016.7	62941.8	84474.2	37457.9	31122	24112	30751.6	22883.8	655406	-0.48	-0.91	0.27	0.53	0.9	0.55	0.98	-3.86	0.97492	0.980786	0.955736	0.962863	1	0.943998	0.948064	0.501127
	C26 H55 N4 O4 P	764602	119354	108381	22341.2	618406	579295	422990	485998	284801	2.68	2.82	5.1	0.31	0.4	0.85	0.65	1.42	0.139287	0.0515724	0.0197865	1	0.999999	0.959696	0.868069	0.835964
[Similar to: NP-013366; ΔMass: 63.1670 Da]	C34 H71 N8 O4 P	547679	111191	43470.5	39784.7	916162	1.07972e+06	798636	852537	357155	2.3	3.66	3.78	-0.74	-0.98	-0.54	-0.64	0.62	0.156845	0.104298	0.100082	0.983911	0.738454	1	1	0.872699
	C24 H49 N7 O5 P2 S	687862	125424	41835.1	21572.4	1.03388e+06	962430	577593	597634	342808	2.46	4.04	4.99	-0.59	-0.48	0.25	0.2	1	0.131749	0.0586248	0.0424938	0.691913	0.788942	1	1	0.958162
Peimine	C27 H45 N O3	32695.4	35192.8	16202	21272.2	49054.9	49023	227702	25393.2	66798.6	-0.11	1.01	0.62	-0.59	-0.58	-2.8	0.36	-1.03	0.998182	0.996892	0.996329	0.999704	0.999032	0.959006	1	1
2-{2-[(2E)-3,6-Dimethyl-2-hepten-1-yl]-3,4-dihydroxyphenyl}-7-hydroxy-2,3-dihydro-4H-chromen-4-one	C24 H28 O5	12633	11478.7	11593.7	11637.4	13788.6	13859.2	13517	12676.7	971275	0.14	0.12	0.12	-0.13	-0.13	-0.1	0	-6.26	1	1	1	1	1	1	1	1.52358e-06
	C14 H27 N O7	81693.2	56258.8	52638.7	87949.1	79500.6	74251.9	71736.9	99157.9	91042.8	0.54	0.63	-0.11	0.04	0.14	0.19	-0.28	-0.16	0.999967	0.999999	0.470039	1	1	1	1	0.999998
Amide C22	C22 H45 N O	92173.1	54351.3	118411	247849	64045.1	78586.5	53284	34813.2	71556.4	0.76	-0.36	-1.43	0.53	0.23	0.79	1.4	0.37	1	0.999995	0.986289	1	1	0.999998	0.811344	1
Linoelaidic Acid	C18 H32 O2	1.24695e+06	650392	583209	311880	854953	880023	644767	1.05444e+06	1.05671e+06	0.94	1.1	2	0.54	0.5	0.95	0.24	0.24	0.997802	0.971381	0.460645	0.999999	1	0.996633	0.999999	1
	C32 H67 N	177014	121976	122001	145745	91073.2	134574	167323	112017	179704	0.54	0.54	0.28	0.96	0.4	0.08	0.66	-0.02	0.821283	1	1	0.99996	1	0.999996	0.999549	0.998495
	C30 H59 N6 O11 P	22347.8	33457.6	38651.8	37703.2	20555.3	23043.2	20128.2	20695.2	1.46279e+06	-0.58	-0.79	-0.75	0.12	-0.04	0.15	0.11	-6.03	1	1	1	1	1	1	1	0.00083954
[Similar to: 2-Aminooctadec-4-yne-1,3-diol; ΔMass: 318.3283 Da]	C41 H77 N O2	2.67329e+06	753971	512269	408665	3.27263e+06	3.61911e+06	2.59394e+06	5.21761e+06	3.14591e+06	1.83	2.38	2.71	-0.29	-0.44	0.04	-0.96	-0.23	0.184677	0.0683242	0.0500129	0.999715	1	0.993461	0.458982	1
Ricinoleic Acid	C18 H34 O3	1.18039e+06	599913	258367	125015	792750	796258	709134	948139	532027	0.98	2.19	3.24	0.57	0.57	0.74	0.32	1.15	0.744874	0.229829	0.197169	0.999965	1	0.970106	0.981241	0.899987
		884110	494410	361049	288854	825617	739800	853027	920052	866733	0.84	1.29	1.61	0.1	0.26	0.05	-0.06	0.03	0.00338858	3.77199e-05	1.00316e-06	0.994166	0.999449	1	0.999999	0.999948
1-tetradecanoyl-2-[(9Z,12Z,15Z)-octadecatrienoyl]-sn-glycero-3-phosphocholine	C40 H74 N O8 P	585922	51305.1	51449.8	46615.1	621965	722190	922003	1.48673e+06	432087	3.51	3.51	3.65	-0.09	-0.3	-0.65	-1.34	0.44	0.274929	0.228115	0.211066	0.995615	0.999567	1	0.972291	0.998188
	C41 H79 N O2	4.17239e+06	964915	297499	220933	2.14076e+06	2.77834e+06	3.63521e+06	6.60756e+06	3.7041e+06	2.11	3.81	4.24	0.96	0.59	0.2	-0.66	0.17	0.0248686	0.00762706	0.00516143	0.51418	0.783978	0.964093	0.787119	0.99938
Theophylline	C7 H8 N4 O2	277590	38332.1	22681.4	28246.7	175435	250472	129473	299006	43296	2.86	3.61	3.3	0.66	0.15	1.1	-0.11	2.68	0.00277186	0.000466246	0.000514534	0.0555636	0.443636	0.0411969	0.482628	0.000109998
hypaphorine	C14 H18 N2 O2	120658	43066.9	26653.8	27246	116403	142422	326247	147988	57272.6	1.49	2.18	2.15	0.05	-0.24	-1.44	-0.29	1.08	0.827626	0.741671	0.696491	1	1	0.936291	1	0.928266
3α,7α-dihydroxy-5β-cholestan-26-oic acid	C27 H46 O4	388935	35847.6	29552.9	17443.5	221347	261761	139757	254124	147765	3.44	3.72	4.48	0.81	0.57	1.48	0.61	1.4	0.383569	0.252231	0.185058	0.999998	1	0.932755	0.974233	1
	C34 H37 O4 P	12930.6	11513.1	11443.8	11315	16272.5	14032.6	13428.5	11990.7	403607	0.17	0.18	0.19	-0.33	-0.12	-0.05	0.11	-4.96	0.975599	0.954331	0.946303	0.998972	0.999922	1	0.999996	0.913762
	C31 H55 N O4	8.37423e+06	3.93831e+06	3.01247e+06	3.48624e+06	2.78203e+06	4.51851e+06	3.35454e+06	7.93048e+06	1.55599e+06	1.09	1.48	1.26	1.59	0.89	1.32	0.08	2.43	0.00576877	9.6611e-05	0.00059816	0.00151078	0.00995503	0.000804947	0.994892	6.84245e-08
	C22 H47 N O	111082	61547.3	174381	292698	85732.4	96723.1	67729.7	38269.4	69596.4	0.85	-0.65	-1.4	0.37	0.2	0.71	1.54	0.67	1	0.999809	0.982098	1	1	0.999988	0.855282	1
[Similar to: (4-benzoylpiperidino)[4-(tert-butyl)phenyl]methanone; ΔMass: 234.2791 Da]	C33 H66 N3 O3 P	486566	53264	62468.5	15528.9	364020	281145	378199	206315	144957	3.19	2.96	4.97	0.42	0.79	0.36	1.24	1.75	0.797714	0.460507	0.32101	0.999983	0.999969	0.992306	0.770853	0.999986
	C16 H19 Cl N3 O P3	9314.91	7597.52	7343.36	7665.25	8717.42	8981.93	8745.43	9137.39	743157	0.29	0.34	0.28	0.1	0.05	0.09	0.03	-6.32	1	1	1	1	1	1	1	2.11459e-08
	C18 H34 N2	264903	178889	162439	194951	186393	167245	216527	212734	562315	0.57	0.71	0.44	0.51	0.66	0.29	0.32	-1.09	0.999746	0.999099	0.99359	0.986823	0.992763	0.998603	0.993233	0.287416
[Similar to: Palmitoyl sphingomyelin; ΔMass: -185.2502 Da]	C25 H47 N3 O6 S	473005	91534.1	51948.4	21417.5	797931	692854	385273	523041	324191	2.37	3.19	4.46	-0.75	-0.55	0.3	-0.15	0.55	0.574802	0.3834	0.329938	0.923441	0.992675	1	0.999996	0.996912
		1.28612e+06	257782	130038	61927.6	1.04997e+06	1.00269e+06	1.18949e+06	2.50223e+06	1.43684e+06	2.32	3.31	4.38	0.29	0.36	0.11	-0.96	-0.16	0.095613	0.0305494	0.0246168	0.898323	0.971982	0.999484	0.819616	1
	C17 H30 Cl N O5	8252.48	5985.29	5436.9	6179.27	7246.24	7415.78	7458.94	6896.61	527238	0.46	0.6	0.42	0.19	0.15	0.15	0.26	-6	1	1	1	1	1	1	1	1.79126e-05
N-dodecanoylsphingosine 1-phosphate	C30 H60 N O6 P	607822	209722	201758	51677.7	883661	882324	381458	720266	567517	1.54	1.59	3.56	-0.54	-0.54	0.67	-0.24	0.1	0.855939	0.447413	0.243575	0.9963	0.999525	0.999225	0.999685	1
3-(Icosanoyloxy)-4-(trimethylammonio)butanoate	C27 H53 N O4	427193	90840.9	47055.2	35650.9	580114	478167	970849	327993	265130	2.23	3.18	3.58	-0.44	-0.16	-1.18	0.38	0.69	0.893719	0.781514	0.742653	0.976365	0.985785	0.279771	0.999998	0.998724
		891301	281531	137265	38173.9	851742	728873	723181	700858	780745	1.66	2.7	4.55	0.07	0.29	0.3	0.35	0.19	0.23328	0.00612958	0.000256177	0.997731	0.999882	0.999456	0.978966	0.996599
		305373	186325	251681	197936	270783	147769	185663	179269	259018	0.71	0.28	0.63	0.17	1.05	0.72	0.77	0.24	0.999716	0.999992	0.999882	1	0.970177	0.996962	0.999992	0.586242
	C19 H45 N3 O6 P2	11634.1	7207.38	42235.2	39679.1	20679.5	17093	12130.6	8913.52	558686	0.69	-1.86	-1.77	-0.83	-0.56	-0.06	0.38	-5.59	1	0.999986	0.999999	1	1	1	1	2.87881e-08
[Similar to: NP-013366; ΔMass: -85.9517 Da]	C31 H51 N7 O	1.45557e+06	238028	51995.3	51311.4	1.72424e+06	1.66909e+06	1.33938e+06	1.67125e+06	894601	2.61	4.81	4.83	-0.24	-0.2	0.12	-0.2	0.7	0.0647009	0.0220513	0.0177682	0.920212	0.888771	1	0.999994	0.958145
Paracetamol	C8 H9 N O2	597930	99500.7	56131.3	29970.2	697106	634034	580805	710771	208695	2.59	3.41	4.32	-0.22	-0.08	0.04	-0.25	1.52	7.16867e-06	6.73642e-08	2.84957e-08	0.984063	0.999936	0.987776	1	6.99823e-06
	C4 H10 N3 P S	12997	19908.8	22068.5	21848.8	11434.7	12598	11552	11343.2	492303	-0.62	-0.76	-0.75	0.18	0.04	0.17	0.2	-5.24	1	1	1	1	1	1	1	0.00903779
[Similar to: Palmitoyl sphingomyelin; ΔMass: 174.0629 Da]		2.22227e+06	396132	241494	240255	1.55776e+06	1.58944e+06	2.71907e+06	2.53169e+06	1.6507e+06	2.49	3.2	3.21	0.51	0.48	-0.29	-0.19	0.43	0.0137623	0.00503688	0.00576578	0.765768	0.956347	0.999952	0.986911	0.999551
1-Oleoyl-rac-glycerol	C21 H40 O4	20165.6	12056.8	11345.7	11738.1	23946	26637.3	22516	18300.4	1.20761e+06	0.74	0.83	0.78	-0.25	-0.4	-0.16	0.14	-5.9	1	1	1	1	1	1	1	4.5464e-06
	C29 H60 N O6 P	519608	62526.7	44692	40087	401827	587822	501024	553409	378991	3.05	3.54	3.7	0.37	-0.18	0.05	-0.09	0.46	0.223731	0.184093	0.176699	0.995041	0.999317	0.98684	1	0.992731
	C23 H27 N3 O2 S	7376.24	6041.47	6120.38	5862.4	7370.44	8069.15	7460.44	6068.97	37602.7	0.29	0.27	0.33	0	-0.13	-0.02	0.28	-2.35	0.999884	0.999355	0.999074	0.995428	0.999864	1	1	1
	C48 H80 N7 O4 P	44500.3	23849.3	43794.4	57020.8	37793.8	29570.2	23964.9	22103	37304.5	0.9	0.02	-0.36	0.24	0.59	0.89	1.01	0.25	0.923207	0.92729	0.950902	0.951476	0.999856	0.911888	0.905101	0.868136
	C39 H72 O3	192806	34413.2	29702.9	35541.7	96449.9	71251.4	46990.3	121251	165529	2.49	2.7	2.44	1	1.44	2.04	0.67	0.22	0.998069	0.99661	0.997342	0.996693	0.976085	1	1	0.999797
		1.2348e+06	230783	252940	227126	566032	442732	598965	1.1673e+06	1.2128e+06	2.42	2.29	2.44	1.13	1.48	1.04	0.08	0.03	0.993406	0.986713	0.993509	1	0.967627	0.999982	1	1
Ancymidol	C15 H16 N2 O2	437542	186256	73615.8	61806.8	227413	372914	159825	524214	101205	1.23	2.57	2.82	0.94	0.23	1.45	-0.26	2.11	0.954406	0.0415563	0.0565117	0.483769	0.924962	0.713152	1	0.0225912
	C41 H88 N9 O5 P3	25039.8	21198	23141.1	21111.9	23550.6	15250.6	14381.7	15964.3	46209.6	0.24	0.11	0.25	0.09	0.72	0.8	0.65	-0.88	0.949561	0.955698	0.949961	1	0.999998	0.943871	0.945695	0.943272
[Similar to: NP-013366; ΔMass: 158.1266 Da]		1.1813e+06	279266	66737.4	54615	1.79773e+06	1.98289e+06	1.4403e+06	1.20965e+06	540082	2.08	4.15	4.43	-0.61	-0.75	-0.29	-0.03	1.13	0.0728203	0.0265574	0.0227325	0.974991	0.990486	1	0.999794	0.654443
[Similar to: NP-003749; ΔMass: 454.4442 Da]		1.93724e+06	250175	195150	172327	1.87752e+06	2.21527e+06	1.85823e+06	2.76025e+06	1.13861e+06	2.95	3.31	3.49	0.05	-0.19	0.06	-0.51	0.77	0.00535012	0.00263993	0.00232774	0.923467	0.99863	0.977572	0.998968	0.275618
	C16 H32 N2 O7 S	8899.67	8462.89	8231.39	9318.28	9047.22	9169.07	9733.95	11132.3	846395	0.07	0.11	-0.07	-0.02	-0.04	-0.13	-0.32	-6.57	1	1	1	1	1	1	1	6.36632e-06
[Similar to: (1S,4aS,7aR)-7-methyl-1-{[(2S,3R,4S,5S,6R)-3,4,5-trihydroxy-6-(hydroxymethyl)oxan-2-yl]oxy}-4a-{[(2S,3R,4R,5R,6S)-3,4,5-trihydroxy-6-methyloxan-2-yl]oxy}-1H,4aH,5H,7aH-cyclopenta[c]pyran-5-one; ΔMass: 38.2863 Da]	C35 H60 O3	972636	857785	795426	701507	662504	700071	688378	925684	258886	0.18	0.29	0.47	0.55	0.47	0.5	0.07	1.91	0.971685	0.632901	0.673347	0.0549135	0.0324204	0.0514381	1	1.80399e-08
[Similar to: 1-[(5-methyl-3-phenylisoxazol-4-yl)carbonyl]-1,2,3,4,6,10b-hexahydropyrimido[2,1-a]isoindol-6-one; ΔMass: 542.5945 Da]		827178	799062	730732	724946	470323	546916	431290	696568	180879	0.05	0.18	0.19	0.81	0.6	0.94	0.25	2.19	0.999981	0.857222	0.996272	0.0115759	0.0270183	0.00231318	0.649812	8.80275e-08
2-(Octadecyloxy)-1,3-propanediyl (6Z,9Z,12Z,6′Z,9′Z,12′Z)bis(-6,9,12-octadecatrienoate)	C57 H100 O5	210684	54320	27474.3	58345.7	113704	71174.3	89377.8	213920	158425	1.96	2.94	1.85	0.89	1.57	1.24	-0.02	0.41	0.993265	0.987294	0.994677	0.993642	0.991549	1	1	1
		435486	271229	246127	241222	310378	295854	273623	514918	491641	0.68	0.82	0.85	0.49	0.56	0.67	-0.24	-0.17	0.986295	0.885078	0.936602	1	0.999963	0.995701	1	0.900676
	C34 H80 N9 O11 P	9372.04	9737.29	12026.7	12793.7	10119	9507.54	10412.9	8360.4	9012.56	-0.06	-0.36	-0.45	-0.11	-0.02	-0.15	0.16	0.06	0.911409	0.911756	0.915044	0.945932	0.999916	0.910224	0.918298	0.817495
		609004	96492.9	48234.1	49801.6	216586	135129	172962	305986	408262	2.66	3.66	3.61	1.49	2.17	1.82	0.99	0.58	0.952554	0.921	0.917625	0.999996	0.980142	0.999951	1	1
C24 Phytoceramide (t18:0/24:0)	C42 H85 N O4	616379	426057	339624	364631	523109	572336	993624	1.27401e+06	648053	0.53	0.86	0.76	0.24	0.11	-0.69	-1.05	-0.07	0.9535	0.608158	0.540576	0.978604	0.988185	0.26251	0.205028	0.999925
[Similar to: NP-013366; ΔMass: 95.1943 Da]	C39 H79 N2 O7 P	1.09028e+06	172126	77460.9	41511.3	1.73689e+06	1.76015e+06	1.64185e+06	1.57647e+06	883965	2.66	3.82	4.72	-0.67	-0.69	-0.59	-0.53	0.3	0.0679966	0.0387514	0.0302969	0.99725	0.816683	0.996477	0.999999	0.95284
[Similar to: NP-013366; ΔMass: -59.9365 Da]	C29 H61 N3 O5 S	1.73982e+06	297769	169030	67225	2.34132e+06	2.31645e+06	1.71956e+06	2.34289e+06	1.03398e+06	2.55	3.36	4.69	-0.43	-0.41	0.02	-0.43	0.75	0.100861	0.0474718	0.0331667	0.946356	0.881355	0.999997	1	0.954727
[Similar to: 5-[(1S,3aR,4S,6aR)-4-(3,4,5-trimethoxyphenyl)-hexahydrofuro[3,4-c]furan-1-yl]-2H-1,3-benzodioxole; ΔMass: 256.3257 Da]	C38 H69 Cl O6	789396	338056	105305	110704	346102	466430	887124	906160	858720	1.22	2.91	2.83	1.19	0.76	-0.17	-0.2	-0.12	0.206818	0.027854	0.0205104	0.608433	0.796315	0.999998	0.998265	1
	C53 H101 O2 P3	612998	117958	117229	100433	370447	337545	369593	483243	522504	2.38	2.39	2.61	0.73	0.86	0.73	0.34	0.23	0.871554	0.795724	0.816322	1	0.999458	0.999912	0.997378	0.999159
		369645	90699.1	51841.8	27673	267578	253998	443879	333828	177276	2.03	2.83	3.74	0.47	0.54	-0.26	0.15	1.06	0.588011	0.505477	0.335847	0.999996	0.999645	0.724127	0.999998	0.999969
	C30 H64 N2 O P2 S	1.18167e+06	199845	199602	53429	854264	885478	715667	720040	567731	2.56	2.57	4.47	0.47	0.42	0.72	0.71	1.06	0.39964	0.101681	0.0449941	1	1	0.983902	0.905812	0.981689
[Similar to: NP-013366; ΔMass: -44.0833 Da]	C32 H42 N3 O5 P	1.49354e+06	284049	160982	58057.7	2.17431e+06	2.04911e+06	1.41231e+06	1.39948e+06	1.05101e+06	2.39	3.21	4.69	-0.54	-0.46	0.08	0.09	0.51	9.21801e-05	2.53297e-05	6.16865e-06	0.588518	0.372823	0.999993	0.997017	0.258015
	C20 H43 N	133032	209843	181528	238146	147219	115216	97272.2	135161	433016	-0.66	-0.45	-0.84	-0.15	0.21	0.45	-0.02	-1.7	0.964393	1	0.999983	0.974181	1	1	0.953883	0.636561
	C34 H62 N6 O4	1.81209e+06	273648	293012	41731.8	1.00267e+06	947059	805636	1.38524e+06	614783	2.73	2.63	5.44	0.85	0.94	1.17	0.39	1.56	0.682813	0.412908	0.292542	0.999837	0.999748	0.953468	0.998183	0.977686
	C77 H96 N8 O4	392101	354979	315433	264801	224523	212461	112290	331693	525222	0.14	0.31	0.57	0.8	0.88	1.8	0.24	-0.42	0.994176	0.974387	0.999757	0.892756	0.781999	0.286227	0.998669	0.975915
	C11 H20 N O2 P S	10029.9	10905.9	7118.81	9228.48	9835.79	12310	10218.7	9075.33	56737.6	-0.12	0.49	0.12	0.03	-0.3	-0.03	0.14	-2.5	0.999995	0.999858	0.999851	0.965297	0.999731	0.999983	1	1
	C32 H68 N2 O P2 S	406298	68528.4	28514.1	21824.7	249318	265653	195282	276757	238219	2.57	3.83	4.22	0.7	0.61	1.06	0.55	0.77	0.666337	0.438821	0.345079	0.999998	0.999951	0.957088	0.993798	1
1-heptadecanoyl-sn-glycero-3-phosphocholine	C25 H52 N O7 P	1.47846e+06	246316	135550	88865.7	2.38107e+06	2.1239e+06	1.22123e+06	1.58231e+06	652175	2.59	3.45	4.06	-0.69	-0.52	0.28	-0.1	1.18	0.0805698	0.0360954	0.024952	0.849611	0.842476	0.999992	0.999998	0.894958
3-(6-Isopropylidene-2,3-dimethyl-2-{[(2-oxo-2H-chromen-7-yl)oxy]methyl}cyclohexyl)propanoic acid	C24 H30 O5	12693.1	7695.4	7129.5	7980.5	18202.2	16398.6	14673.8	8650.62	1.13015e+06	0.72	0.83	0.67	-0.52	-0.37	-0.21	0.55	-6.48	1	1	1	1	1	1	1	1.57886e-06
	C52 H99 O9 P	719489	344485	71314.7	121492	424703	367607	625345	958545	563384	1.06	3.33	2.57	0.76	0.97	0.2	-0.41	0.35	0.966442	0.842489	0.870042	0.999963	0.968974	1	0.997699	0.998361
	C29 H55 N O2	113757	39080.2	46789.9	52237.9	30799.1	34969.4	31607.6	31320.3	408521	1.54	1.28	1.12	1.88	1.7	1.85	1.86	-1.84	0.882936	1	1	0.999999	1	0.999993	0.99997	0.204352
	C16 H44 N9 O2 P S2	237775	170574	162000	132868	101955	121356	112405	92923.6	64858.5	0.48	0.55	0.84	1.22	0.97	1.08	1.36	1.87	0.758389	0.76087	0.713878	0.613925	0.999998	0.658712	0.481091	0.275698
	C50 H104 N4 O10 S	420254	52957	52365.4	59460.8	109808	97370.4	176650	466948	395017	2.99	3	2.82	1.94	2.11	1.25	-0.15	0.09	0.922413	0.888441	0.913907	1	0.997009	0.999987	0.98001	0.999492
5-Heneicosylresorcinol	C27 H48 O2	240803	28996.3	17975.4	16315	307351	290940	203747	239473	86942.3	3.05	3.74	3.88	-0.35	-0.27	0.24	0.01	1.47	0.687558	0.596027	0.578571	0.881008	0.939257	1	0.999974	0.955887
	C18 H44 Cl N6 O3 P	10019	9258.1	7825.68	9610.52	9295.76	9745.77	10979.2	9371.61	795500	0.11	0.36	0.06	0.11	0.04	-0.13	0.1	-6.31	1	1	1	1	1	1	1	9.06917e-07
	C21 H35 N O9	97659.4	52214.2	41466.8	42633.8	132442	120224	90359.5	79447.6	952257	0.9	1.24	1.2	-0.44	-0.3	0.11	0.3	-3.29	0.999998	0.99998	0.999978	0.999957	1	1	1	8.51996e-07
	C41 H86 Cl N9	1.13807e+06	727226	976153	725648	725606	1.35646e+06	869040	1.03959e+06	982126	0.65	0.22	0.65	0.65	-0.25	0.39	0.13	0.21	0.826019	0.998841	0.956706	0.705467	0.905206	0.998499	1	0.998768
LysoPC(P-18:0)	C26 H54 N O6 P	2.17097e+06	353642	158395	65148.9	3.74697e+06	3.3884e+06	2.28693e+06	2.19903e+06	1.2447e+06	2.62	3.78	5.06	-0.79	-0.64	-0.08	-0.02	0.8	0.00626297	0.00151875	0.000935217	0.283872	0.457875	1	0.999995	0.686919
	C52 H104 N8 O5 S	80677.6	29241.4	34180.1	32952.4	33185.7	36243.3	29568.8	97669.9	70449.8	1.46	1.24	1.29	1.28	1.15	1.45	-0.28	0.2	0.999781	0.999783	0.99984	0.98224	0.8042	1	1	1
N-[(4Z,8Z)-1,3-Dihydroxy-4,8-octadecadien-2-yl]hexadecanamide	C34 H65 N O3	768467	101836	32766.7	32002.9	377981	518332	476325	870096	386224	2.92	4.55	4.59	1.02	0.57	0.69	-0.18	0.99	0.061942	0.0238352	0.0441809	0.849502	0.995253	0.999959	0.468461	0.972628
		306322	156680	70777.1	74566.3	110490	98990.8	159411	435174	432130	0.97	2.11	2.04	1.47	1.63	0.94	-0.51	-0.5	0.843446	0.343989	0.338748	0.499335	0.545936	0.927083	0.930174	0.305872
		937431	473220	282358	178500	979057	1.1217e+06	832933	636665	727705	0.99	1.73	2.39	-0.06	-0.26	0.17	0.56	0.37	0.639341	0.0595802	0.00446524	0.869635	0.352406	0.968862	0.99485	1
N-Tricosanoylglycine	C25 H49 N O3	12724	11860.6	11403.2	11930.3	12924.4	12669.7	12851	12273.9	995832	0.1	0.16	0.09	-0.02	0.01	-0.01	0.05	-6.29	1	1	1	1	1	1	1	5.10949e-06
	C22 H32 Cl N6 O2 P	8282.81	6790.51	6780.83	6383.49	8292.72	9152.28	8651.27	7061.23	40921.6	0.29	0.29	0.38	0	-0.14	-0.06	0.23	-2.3	0.999885	0.999453	0.999267	0.996095	0.999781	1	1	1
	C29 H53 N5 O3 P2 S	1.12211e+06	218429	98046.8	59991.1	2.07808e+06	1.84449e+06	1.24148e+06	1.28822e+06	717903	2.36	3.52	4.23	-0.89	-0.72	-0.15	-0.2	0.64	0.0173024	0.00498216	0.00302247	0.424167	0.666249	1	1	0.818771
	C12 H24 O8	104983	62275.8	50190.5	54232.9	56691.2	57147.4	57441.6	51645.1	52689	0.75	1.06	0.95	0.89	0.88	0.87	1.02	0.99	0.615108	0.347262	0.439226	0.32952	0.997576	0.369772	0.311894	0.269442
[Similar to: PEG n16; ΔMass: -122.9512 Da]	C33 H66 N3 O4 P	19314.7	111729	21280.1	21709.5	20699	27548.6	405860	20049.4	19921	-2.53	-0.14	-0.17	-0.1	-0.51	-4.39	-0.05	-0.04	0.999994	0.996642	0.99879	0.994778	0.999603	0.446091	0.99801	0.999845
[Similar to: Palmitoyl sphingomyelin; ΔMass: -153.2237 Da]	C27 H52 N O8 P	307867	144344	114744	119735	213715	215574	332893	481528	767614	1.09	1.42	1.36	0.53	0.51	-0.11	-0.65	-1.32	0.985717	0.966285	0.956562	0.995817	0.998723	1	1	0.170896
	C28 H53 O P S	265792	86170.2	70868.8	73574.9	321241	257435	238148	81024.7	184556	1.63	1.91	1.85	-0.27	0.05	0.16	1.71	0.53	0.993283	0.89069	0.448611	0.908038	1	0.999991	0.550727	0.999356
	C28 H52 O5	570656	130674	191568	170906	486616	525247	444229	285721	250705	2.13	1.57	1.74	0.23	0.12	0.36	1	1.19	0.468465	0.302628	0.230898	1	0.999187	0.999709	0.606013	0.803793
	C32 H45 N4 P	326835	138154	77646.9	105724	154105	149925	143218	218807	283903	1.24	2.07	1.63	1.08	1.12	1.19	0.58	0.2	0.269311	0.0283561	0.104584	0.19579	0.280874	0.206487	0.698414	0.999878
9,10-Dihydroxystearic acid	C18 H36 O4	885744	162661	100331	53253.3	648394	646194	405722	756297	332798	2.45	3.14	4.06	0.45	0.45	1.13	0.23	1.41	0.343524	0.113359	0.0936269	0.999862	0.999994	0.92814	0.984364	0.852262
(2R)-1-{[(2-Aminoethoxy)(hydroxy)phosphoryl]oxy}-3-hydroxy-2-propanyl (11Z)-11-icosenoate	C25 H50 N O7 P	1.01702e+06	196610	85539.7	49330.3	1.8254e+06	1.73714e+06	861724	1.21236e+06	682841	2.37	3.57	4.37	-0.84	-0.77	0.24	-0.25	0.57	0.047716	0.0172323	0.0109608	0.567093	0.706984	0.99585	0.999999	0.871778
		231996	37842.6	37649.4	39219.9	80367.6	39351.6	80224.7	142735	165463	2.62	2.62	2.56	1.53	2.56	1.53	0.7	0.49	0.978119	0.978312	0.979334	0.999473	0.948424	0.999996	1	1
	C18 H28 O6	14687.6	588311	614105	687312	15845.9	14238	18657.4	9544.09	384961	-5.32	-5.39	-5.55	-0.11	0.04	-0.35	0.62	-4.71	2.28663e-11	3.74467e-12	1.13787e-12	1	1	1	1	2.61244e-07
		675925	256171	130035	148030	234574	368981	707833	1.19276e+06	947101	1.4	2.38	2.19	1.53	0.87	-0.07	-0.82	-0.49	0.570517	0.352338	0.333834	0.701331	0.765806	0.954178	0.918458	0.991959
[Similar to: 6,15-diketo-13,14-dihydro Prostaglandin F1?; ΔMass: 171.2361 Da]	C32 H63 N O5	591336	164668	140662	24355.6	661659	598753	366585	413894	278581	1.84	2.07	4.6	-0.16	-0.02	0.69	0.51	1.09	0.20617	0.0584266	0.0188799	0.999991	0.999955	0.939732	0.867241	0.853508
	C15 H26 N6 O2 S	153369	30613.9	17937	8988.02	246133	266563	275160	182007	110294	2.32	3.1	4.09	-0.68	-0.8	-0.84	-0.25	0.48	0.770605	0.654663	0.593765	0.717549	0.689718	0.828238	1	0.999958
Ricinoleic Acid	C18 H34 O3	396206	277777	105317	39586.8	268115	298526	371301	337270	239181	0.51	1.91	3.32	0.56	0.41	0.09	0.23	0.73	0.999986	0.48126	0.793148	0.999998	1	0.999999	0.998306	0.999656
Benzylfentanyl	C21 H26 N2 O	290968	56340.8	34313	47422.5	73595	263200	56490.6	215562	13805.9	2.37	3.08	2.62	1.98	0.14	2.36	0.43	4.4	0.772597	0.0989257	0.151517	0.677477	0.976588	0.813775	0.928837	0.0234936
	C26 H41 N2 O7 P S	12037	7853.84	7418.69	6590.4	13933.2	11665.5	11347.4	9300.35	24138.5	0.62	0.7	0.87	-0.21	0.05	0.09	0.37	-1	0.995285	0.98639	0.982928	0.949948	0.988534	0.99935	1	1
	C51 H94 N6 O3	79212.9	26772.5	26240.9	25057.5	21407.4	28276.2	25765.9	64939.9	38610.2	1.56	1.59	1.66	1.89	1.49	1.62	0.29	1.04	0.999904	0.999866	0.99993	0.968177	0.790588	1	1	1
	C37 H76 N8 O12 P2	530896	46634.2	39998.6	35205.3	303873	477198	402800	1.02302e+06	240442	3.51	3.73	3.91	0.8	0.15	0.4	-0.95	1.14	0.28862	0.150585	0.135647	0.914691	0.983346	0.997342	0.701127	0.994353
	C45 H74 O3	397533	130174	124014	56866.6	481902	388956	394310	726360	531485	1.61	1.68	2.81	-0.28	0.03	0.01	-0.87	-0.42	0.687993	0.548954	0.393741	0.999686	0.994077	0.999949	0.997639	0.999819
	C42 H80 O2 P2 S	933275	805843	462472	575172	511234	576985	748738	1.32974e+06	1.24155e+06	0.21	1.01	0.7	0.87	0.69	0.32	-0.51	-0.41	0.999329	0.588297	0.60683	0.589933	0.720975	0.999442	0.893044	0.725597
Rivastigmine	C14 H22 N2 O2	83977.2	9523.98	4977.45	5316.27	244152	154799	75362.9	73061.6	57308.3	3.14	4.08	3.98	-1.54	-0.88	0.16	0.2	0.55	0.977709	0.953957	0.95495	0.832059	0.929833	0.999977	0.999999	1
	C15 H36 N5 O3 P	141285	65033.1	18668.7	12214.2	184129	192058	146800	97447.7	88858.9	1.12	2.92	3.53	-0.38	-0.44	-0.06	0.54	0.67	0.475713	0.104082	0.205354	0.924185	0.853342	1	0.995396	0.963393
	C39 H82 N O5 P3	450167	40537.9	26871.5	26743.6	459204	544439	965353	789135	312082	3.47	4.07	4.07	-0.03	-0.27	-1.1	-0.81	0.53	0.240399	0.187966	0.188048	1	1	0.910601	0.998069	0.997094
	C49 H91 N5 O7 P2	12909.6	11355.9	12870.8	11011.5	16543.6	13404.8	12657.1	12348.8	30604.4	0.19	0	0.23	-0.36	-0.05	0.03	0.06	-1.25	0.957908	0.962382	0.955164	1	0.999986	0.957359	0.956364	0.975596
	C24 H52 N9 P3	35749.1	57186.7	93891.8	69075.2	23695	35582.2	46252.1	20827.3	36713.4	-0.68	-1.39	-0.95	0.59	0.01	-0.37	0.78	-0.04	0.973027	0.99794	0.992797	0.845922	0.945359	0.999999	0.98398	0.952075
Triethyl citrate	C12 H20 O7	33466.6	24369.3	23584.3	43160.4	38032	19761.3	28355.3	50876.1	36443.9	0.46	0.5	-0.37	-0.18	0.76	0.24	-0.6	-0.12	0.999983	0.999998	0.480202	1	1	1	1	1
	C26 H44 N O8 P	146245	47855.9	36257.4	30919.7	54808.6	83279.6	357119	153534	343970	1.61	2.01	2.24	1.42	0.81	-1.29	-0.07	-1.23	0.996476	0.992053	0.984321	0.998977	0.999487	0.345292	0.999967	0.084858
	C28 H31 Cl N2 O2	12031.9	10812.6	10292.1	10534.6	12915	12285.4	11714.1	10123	46261	0.15	0.23	0.19	-0.1	-0.03	0.04	0.25	-1.94	0.99989	0.999487	0.999218	0.997268	0.999884	0.999999	1	1
	C16 H41 N7 O3 S	233584	41591.1	33809.3	9060.85	324445	343277	280525	223507	175862	2.49	2.79	4.69	-0.47	-0.56	-0.26	0.06	0.41	0.704781	0.528336	0.440046	0.864563	0.88981	0.999943	1	0.999976
(4S)-4-[(2E,4Z)-2,4-Decadienoyloxy]-4-(trimethylammonio)butanoate	C17 H29 N O4	652333	172992	72203.1	62630.3	546009	510352	452806	478197	367375	1.91	3.18	3.38	0.26	0.35	0.53	0.45	0.83	0.046568	0.00774847	0.00444576	0.999996	0.999998	0.999984	1	0.98253
	C23 H48 N O6 P	727695	157299	60359.3	22990.4	816650	800383	625379	806835	400747	2.21	3.59	4.98	-0.17	-0.14	0.22	-0.15	0.86	0.00626089	0.000979337	0.00052147	0.998073	0.968175	0.999997	1	0.575313
1-[(1Z,9Z)-octadecadienyl]-sn-glycero-3-phosphocholine	C26 H52 N O6 P	1.21741e+06	258917	84399.9	33087.3	1.8868e+06	1.85868e+06	1.1199e+06	1.08656e+06	522375	2.23	3.85	5.2	-0.63	-0.61	0.12	0.16	1.22	0.0520317	0.0168355	0.0113332	0.564682	0.639837	1	1	0.837889
	C14 H40 N9 O P	32490.1	17787.9	23336.3	18208.9	20109.9	22833.2	16962.4	26045.9	25427.2	0.87	0.48	0.84	0.69	0.51	0.94	0.32	0.35	0.852287	0.861704	0.947333	0.836804	1	0.831846	0.924597	0.742814
	C26 H53 N O	322371	165189	135344	150094	105904	98435.6	154360	254558	283925	0.96	1.25	1.1	1.61	1.71	1.06	0.34	0.18	0.509738	0.198405	0.455198	0.408948	0.298514	0.445058	0.978046	1
	C18 H41 N3 O7 S	11749.7	11465	10915.7	10325.2	13122.3	12904.1	11101.9	11243.8	788704	0.04	0.11	0.19	-0.16	-0.14	0.08	0.06	-6.07	1	1	1	1	1	1	1	2.56023e-06
O-heptadecanoylcarnitine	C24 H47 N O4	288425	94594.2	20454.8	43513.1	245228	367076	1.25354e+06	241628	152145	1.61	3.82	2.73	0.23	-0.35	-2.12	0.26	0.92	0.669732	0.357955	0.360987	0.987488	0.91585	5.96276e-11	0.999978	0.988262
	C27 H57 N3 O6 S	76768.1	9183.08	8454.62	8943.37	34768	28757.3	11307.4	11631.5	76209.7	3.06	3.18	3.1	1.14	1.42	2.76	2.72	0.01	0.219145	0.200264	0.201819	0.504999	0.56542	0.278653	0.2642	0.617768
N-Docosanoylglycine	C24 H47 N O3	98451.2	53311.1	145028	224608	136260	114527	118713	91481.1	83953.3	0.88	-0.56	-1.19	-0.47	-0.22	-0.27	0.11	0.23	1	0.999998	0.999716	1	1	1	0.818299	0.98331
	C23 H53 N4 O3 P	65700.1	13944.1	14536.4	13765.1	118917	204853	90924.9	73172.7	29881.3	2.24	2.18	2.25	-0.86	-1.64	-0.47	-0.16	1.14	0.945201	0.938472	0.938106	0.936865	0.90218	1	0.999999	0.990872
[Similar to: NP-013366; ΔMass: 94.1256 Da]	C40 H67 N3 O8	194470	44904.8	44432.7	42016.5	55400.8	85145.1	50602.7	207462	415807	2.11	2.13	2.21	1.81	1.19	1.94	-0.09	-1.1	0.995204	0.996418	0.994373	0.99868	0.999732	0.999584	1	0.188533
	C27 H50 O3	118405	15847.2	14663.5	16157.4	153367	174376	102628	166116	58763.3	2.9	3.01	2.87	-0.37	-0.56	0.21	-0.49	1.01	0.817611	0.759715	0.768492	0.741269	0.882351	0.999987	1	0.991508
[Similar to: NP-003749; ΔMass: 157.2404 Da]	C34 H62 N P3	903091	281368	151691	85852	1.42912e+06	1.49246e+06	1.00139e+06	1.15252e+06	870018	1.68	2.57	3.39	-0.66	-0.72	-0.15	-0.35	0.05	0.12306	0.0694573	0.0433089	0.996786	1	0.977863	0.980358	0.984763
phenindamine	C19 H19 N	32690.9	32451	19243.6	27026.7	24431.1	28407	31216.5	23914.5	65121.3	0.01	0.76	0.27	0.42	0.2	0.07	0.45	-0.99	0.999749	0.998676	0.999106	0.996847	0.999685	0.999998	1	1
[Similar to: Nervonic ceramide; ΔMass: 33.9314 Da]	C40 H75 N O7	200925	44040.6	43708.6	39595	61095.9	55541.3	58698	402651	153035	2.19	2.2	2.34	1.72	1.86	1.78	-1	0.39	0.985417	0.96783	0.964621	0.97178	0.990058	0.978697	0.999792	0.999912
	C20 H40 N2 O	21583.3	27182.7	30106.1	26691.4	33124.2	80164.6	22142.2	87882.4	402662	-0.33	-0.48	-0.31	-0.62	-1.89	-0.04	-2.03	-4.22	1	1	1	1	0.999986	1	0.987085	0.0257466
LysoPC(22:5(7Z,10Z,13Z,16Z,19Z))	C30 H52 N O7 P	491968	105909	45346.8	26895.2	894030	782375	535778	470182	251101	2.22	3.44	4.19	-0.86	-0.67	-0.12	0.07	0.97	0.177329	0.0657182	0.0525418	0.554707	0.82927	0.999784	0.999998	0.938738
	C16 H29 N7	492341	141859	88372.2	65122.3	837135	854210	665522	475541	279472	1.8	2.48	2.92	-0.77	-0.79	-0.43	0.05	0.82	0.0680367	0.00892705	0.00550278	0.00471199	0.0506681	0.933557	1	0.466934
	C18 H26 N2 O2	9420.75	13190.2	13965.9	14631.7	19335	62635.8	98501.7	8433.14	13955.4	-0.49	-0.57	-0.64	-1.04	-2.73	-3.39	0.16	-0.57	0.992341	0.988162	0.98859	1	0.981005	1	1	0.991314
Myxalamid A	C26 H41 N O3	214077	38731.7	23631.5	24551.3	322102	387864	285791	261939	79362.2	2.47	3.18	3.12	-0.59	-0.86	-0.42	-0.29	1.43	0.731902	0.498081	0.497721	0.87482	0.875096	0.991544	1	0.956933
	C64 H109 N8 O9 P3	405907	114983	91387.3	42638.6	131870	129512	93464.1	627144	254307	1.82	2.15	3.25	1.62	1.65	2.12	-0.63	0.67	0.145545	0.0270179	0.00729939	0.0636098	0.0579086	0.0254409	0.71663	0.964868
	C25 H56 N5 O14 P	1.82265e+06	1.69049e+06	1.58725e+06	1.47375e+06	1.9136e+06	2.09364e+06	1.84727e+06	2.01905e+06	1.64752e+06	0.11	0.2	0.31	-0.07	-0.2	-0.02	-0.15	0.15	1	0.999972	0.999751	1	0.999999	0.558557	0.999999	1
	C29 H65 N9 O2 P2	963747	147064	70877.6	63570.2	1.02649e+06	1.39837e+06	851956	1.25536e+06	783476	2.71	3.77	3.92	-0.09	-0.54	0.18	-0.38	0.3	0.0230571	0.00886915	0.00815696	1	0.999045	0.998396	0.999964	0.981179
	C29 H59 N O4	189805	17476	18883.2	16449.5	239780	281464	185599	263142	68826.6	3.44	3.33	3.53	-0.34	-0.57	0.03	-0.47	1.46	0.556901	0.512412	0.504058	0.925395	0.912732	1	1	0.896155
	C25 H49 P S	142613	39622.3	21345.1	19277.6	353794	304345	186067	110489	111164	1.85	2.74	2.89	-1.31	-1.09	-0.38	0.37	0.36	0.777881	0.625791	0.588654	0.00312377	0.12124	0.57551	0.999994	0.999999
	C33 H63 N O10	176799	254534	204259	355080	120263	148315	124171	214526	216490	-0.53	-0.21	-1.01	0.56	0.25	0.51	-0.28	-0.29	0.553855	0.321829	0.69661	0.154743	0.274638	0.219032	0.905458	0.262019
	C16 H43 N7 P2 S	72971.9	68220.6	54463.9	96128.7	29142.4	51958.7	44560.4	51848.2	44299.6	0.1	0.42	-0.4	1.32	0.49	0.71	0.49	0.72	0.961449	0.993392	0.994351	0.814537	0.912617	1	0.999902	0.809722
	C35 H36 N2 O3	31675	33103.3	48072.1	55565.8	14989.9	16304.2	13838.1	28475.8	49755.1	-0.06	-0.6	-0.81	1.08	0.96	1.19	0.15	-0.65	0.993162	0.995787	0.999996	0.99356	0.998813	0.97533	0.992467	0.999996
(2S)-1-Hydroxy-3-(pentadecanoyloxy)-2-propanyl (9Z,12Z)-9,12-octadecadienoate	C36 H66 O5	821399	124257	192553	31896.8	556191	566056	406815	660174	316285	2.72	2.09	4.69	0.56	0.54	1.01	0.32	1.38	0.264283	0.108259	0.0485338	1	0.999858	0.88771	0.958946	0.819248
	C39 H69 N5 O	1.54229e+06	254565	220988	53822.3	721567	896858	779013	1.62169e+06	691191	2.6	2.8	4.84	1.1	0.78	0.99	-0.07	1.16	0.299618	0.10942	0.062892	0.995721	0.999928	0.808656	0.999991	0.829935
[Similar to: Palmitic Acid; ΔMass: 86.0842 Da]	C20 H42 N2 O2	502816	156452	110424	82746	813645	869798	674969	472747	324800	1.68	2.19	2.6	-0.69	-0.79	-0.42	0.09	0.63	0.0366898	0.00947018	0.00487821	0.0272727	0.0476147	0.897812	0.999971	0.55542
(2S)-1-Hydroxy-3-(pentadecanoyloxy)-2-propanyl (9Z,12Z,15Z)-9,12,15-octadecatrienoate	C36 H64 O5	1.1437e+06	175185	190254	37121	800796	902701	418785	641646	466480	2.71	2.59	4.95	0.51	0.34	1.45	0.83	1.29	0.149744	0.084189	0.0281595	0.99996	1	0.916821	0.918176	0.956154
	C27 H48 N4	300962	69924.4	40719	24717.9	311780	395582	243678	352091	186187	2.11	2.89	3.61	-0.05	-0.39	0.3	-0.23	0.69	0.676326	0.520389	0.481943	0.967548	0.972324	0.999997	0.999992	0.996561
[Similar to: NP-007441; ΔMass: 39.1299 Da]	C21 H38 N2 O3	555886	125437	58152.2	38093.9	1.2399e+06	1.10666e+06	670880	400240	390748	2.15	3.26	3.87	-1.16	-0.99	-0.27	0.47	0.51	0.162954	0.0485956	0.0403244	0.00498429	0.0470204	0.999926	0.999967	0.997478
		254649	225910	188155	184487	158393	197993	172910	174851	341508	0.17	0.44	0.46	0.69	0.36	0.56	0.54	-0.42	0.999739	0.992091	0.984642	0.981484	0.999116	0.985392	0.992792	0.798924
	C48 H67 N5 O2 P2	83117.8	34186.5	29096.5	26157.2	82779.5	118112	486150	314879	109318	1.28	1.51	1.67	0.01	-0.51	-2.55	-1.92	-0.4	0.849545	0.652599	0.604954	0.978589	0.95954	0.067552	0.995762	0.987212
2-(3-Phenylpropyl)pyridine	C14 H15 N	116729	111692	69516	73960.2	70199.6	84357.6	114769	134479	50745.8	0.06	0.75	0.66	0.73	0.47	0.02	-0.2	1.2	0.517086	0.999873	0.99998	0.999854	1	1	1	0.999126
	C14 H29 N	54139.4	64499.8	113583	200352	66767.1	111185	66441.1	27052.8	80807.7	-0.25	-1.07	-1.89	-0.3	-1.04	-0.3	1	-0.58	0.993338	0.999791	1	0.999969	1	0.997924	0.999962	0.99761
3-[(2,6-Dimethylheptanoyl)oxy]-4-(trimethylammonio)butanoate	C16 H31 N O4	440542	225059	157372	160460	476533	477121	427638	389692	494740	0.97	1.49	1.46	-0.11	-0.12	0.04	0.18	-0.17	0.554323	0.324232	0.355533	1	1	1	0.999999	0.999907
		286950	63231.4	65151.5	79318.7	95030.1	179655	325410	433156	394890	2.18	2.14	1.86	1.59	0.68	-0.18	-0.59	-0.46	0.811138	0.676745	0.714048	0.990994	0.999702	0.999938	0.922424	0.984341
[Similar to: 4-{[(morpholinosulfonyl)methyl]sulfonyl}morpholine; ΔMass: 38.2118 Da]	C20 H36 N2 O3	540667	163727	76843.8	68793.6	1.00817e+06	917015	371319	377969	437309	1.72	2.81	2.97	-0.9	-0.76	0.54	0.52	0.31	0.289401	0.0464515	0.0403156	0.0479638	0.273326	0.999869	0.998745	0.999992
	C15 H38 N5 O3 P	394472	61822.4	47499.9	18794.8	587943	669929	495549	506676	256870	2.67	3.05	4.39	-0.58	-0.76	-0.33	-0.36	0.62	0.511041	0.287584	0.227372	0.621629	0.638622	0.997647	1	0.999977
	C24 H45 N5 O7	49217.6	63654.8	108451	92482.5	38684.9	37868.7	47461	60405.4	37453.8	-0.37	-1.14	-0.91	0.35	0.38	0.05	-0.3	0.39	0.959811	0.999002	0.993903	0.928514	0.87522	0.999919	0.996916	0.785917
	C39 H76 N2 O4 S	287492	131148	79162.5	71698.2	92535.8	104178	298822	716811	697293	1.13	1.86	2	1.64	1.46	-0.06	-1.32	-1.28	0.991489	0.885707	0.900728	0.942283	0.942114	0.999064	0.860647	0.158429
	C27 H55 N8 O P	679325	132979	124647	32272.4	360187	283772	355570	281090	233846	2.35	2.45	4.4	0.92	1.26	0.93	1.27	1.54	0.678166	0.366949	0.171567	0.999989	0.969967	0.985317	0.792556	0.999982
1-[(E)-hexadec-1-enyl]-sn-glycero-3-phosphoethanolamine	C21 H44 N O6 P	765690	144138	74367.6	24386.7	790987	898417	765222	920834	431357	2.41	3.36	4.97	-0.05	-0.23	0	-0.27	0.83	0.00523055	0.00138578	0.000570043	0.991063	0.961509	0.999962	1	0.552797
[Similar to: NP-013366; ΔMass: 54.0760 Da]	C30 H63 N9 O4 S2	919452	169142	38813.9	33994.9	269482	201270	395356	613030	67823.7	2.44	4.57	4.76	1.77	2.19	1.22	0.58	3.76	0.000383231	6.84869e-05	6.52609e-05	0.00278143	0.00609517	0.0233885	0.64658	5.22929e-06
	C48 H71 N4 P	972270	372734	446549	233613	270399	374967	537431	1.46943e+06	1.26479e+06	1.38	1.12	2.06	1.85	1.37	0.86	-0.6	-0.38	0.628068	0.361082	0.111197	0.185635	0.27049	0.889595	0.690698	0.426841
[Similar to: 6-Deoxy-β-D-galactopyranosyl-(1->4)-[β-D-glucopyranosyl-(1->3)-β-D-xylopyranosyl-(1->4)-6-deoxy-α-L-mannopyranosyl-(1->2)]-6-deoxy-1-O-[(3β,5ξ,9ξ,16α)-3-{[2-O-(β-D-galactopyranosyl)-β-D-glucopyranuronosyl]oxy}-16-hydroxy-23,28-dioxoolean-12-en-28-yl]-β-D-galactopyranose; ΔMass: -1081.4310 Da]	C21 H42 N5 O P S2	142247	14590.3	10760.9	11427.9	260173	238827	182290	127069	613128	3.29	3.72	3.64	-0.87	-0.75	-0.36	0.16	-2.11	0.987588	0.98377	0.984072	0.987823	0.996209	0.999997	1	7.88082e-05
		90463.2	33965.8	37974.2	32180.9	49516.9	60814.7	35497.5	120303	73962.3	1.41	1.25	1.49	0.87	0.57	1.35	-0.41	0.29	0.999973	0.999943	0.999962	0.987711	0.881439	1	1	0.999998
	C40 H72 N9 O10 P	453038	59821.9	45521.9	40323.1	398438	562853	444558	1.19933e+06	457918	2.92	3.31	3.49	0.19	-0.31	0.03	-1.4	-0.02	0.171847	0.0921887	0.0722019	0.910349	0.976491	0.98759	0.398224	0.999266
	C23 H46 N4 O2 P2	79661.5	82204.3	56879.3	55923.9	138333	221609	187891	54495.4	225126	-0.05	0.49	0.51	-0.8	-1.48	-1.24	0.55	-1.5	0.999297	0.997337	0.996875	0.995669	0.979737	0.944291	0.994472	0.677833
	C41 H79 N O14	142862	220150	160839	225603	118890	128364	99707.3	121335	193662	-0.62	-0.17	-0.66	0.26	0.15	0.52	0.24	-0.44	0.758182	0.371817	0.658771	0.294737	0.330163	0.270278	0.782831	0.408055
		427797	105017	36254.8	106511	594292	578663	425644	261398	354263	2.03	3.56	2.01	-0.47	-0.44	0.01	0.71	0.27	0.123362	0.109851	0.114895	0.999141	0.99996	1	0.892812	0.967725
	C23 H45 N5 O3	343703	326324	268980	327538	298354	355439	279276	283638	1.1173e+06	0.07	0.35	0.07	0.2	-0.05	0.3	0.28	-1.7	0.987995	0.970429	0.99995	0.982862	1	0.99726	0.986339	0.243748
Michler's ketone	C17 H20 N2 O	78549.8	36455.6	24989	32603.1	20083	38419.2	28295.7	71601.6	20878.9	1.11	1.65	1.27	1.97	1.03	1.47	0.13	1.91	0.945422	0.996879	0.999722	0.99623	0.999995	1	0.999993	0.987602
[Similar to: NP-022473; ΔMass: 281.1996 Da]	C35 H49 N5 O4	662263	515485	488187	380082	417354	395126	394391	442592	509924	0.36	0.44	0.8	0.67	0.75	0.75	0.58	0.38	0.985057	0.863142	0.908312	0.874236	0.687903	0.755553	0.881982	1
	C28 H50 N4	466698	40902.4	39175.6	22824.4	561838	643584	281682	499042	206487	3.51	3.57	4.35	-0.27	-0.46	0.73	-0.1	1.18	0.449735	0.333175	0.299178	0.821558	0.890682	1	0.999999	0.995629
	C22 H39 N O6	27003	608229	624879	696248	31577.9	25632.4	38728.7	19149.8	460446	-4.49	-4.53	-4.69	-0.23	0.08	-0.52	0.5	-4.09	6.58766e-11	1.50581e-11	2.44615e-12	1	1	1	0.999999	3.06187e-08
	C21 H37 N O	47997.2	26264.5	95420.5	162843	19250.3	40946	17960.6	7744.04	198484	0.87	-0.99	-1.76	1.32	0.23	1.42	2.63	-2.05	0.973205	0.999165	1	0.991491	0.999934	0.975034	0.999994	0.999919
Mebeverine	C25 H35 N O5	14501.9	12811.2	16037.2	16599.2	14523.4	17494.4	15283.7	12631.5	643618	0.18	-0.15	-0.19	0	-0.27	-0.08	0.2	-5.47	1	1	1	1	1	1	1	3.07383e-06
	C57 H108 N5 O5 P	1.03758e+06	254536	106385	103828	435261	576031	1.1463e+06	1.44584e+06	1.72554e+06	2.03	3.29	3.32	1.25	0.85	-0.14	-0.48	-0.73	0.995066	0.985281	0.985722	0.99727	1	1	0.834777	0.792037
	C22 H47 N O	82757.6	41228.8	139323	251577	75909.1	89034.5	59422.5	33983.7	31678.1	1.01	-0.75	-1.6	0.12	-0.11	0.48	1.28	1.39	0.999998	0.999989	0.971813	1	1	0.999996	0.871585	0.999899
[Similar to: Cytidine 5'-diphosphocholine; ΔMass: 210.4283 Da]	C39 H75 N2 O6 P	1.54118e+06	397745	115052	94040.5	2.31488e+06	2.30691e+06	1.71122e+06	1.70636e+06	891980	1.95	3.74	4.03	-0.59	-0.58	-0.15	-0.15	0.79	0.0891416	0.0321093	0.0254045	0.992514	0.965723	1	1	0.961103
O-pentadecanoylcarnitine	C22 H43 N O4	260907	21864	15609	14113.5	398672	386644	1.02533e+06	215485	122343	3.58	4.06	4.21	-0.61	-0.57	-1.97	0.28	1.09	0.554994	0.427522	0.417059	0.599299	0.619918	1.20288e-08	0.99999	0.995429
	C21 H37 N O	41959.2	24134.2	83908.7	159014	24235.8	49462.3	25786.3	8010.05	43993.3	0.8	-1	-1.92	0.79	-0.24	0.7	2.39	-0.07	0.949821	0.995843	1	0.990117	0.999933	0.975399	1	0.988912
[Similar to: 3-{2-[(1R,4aS,5R,8aS)-6-hydroxy-5-(hydroxymethyl)-5,8a-dimethyl-2-methylidene-decahydronaphthalen-1-yl]ethyl}-2,5-dihydrofuran-2-one; ΔMass: 873.5794 Da]	C83 H107 N3 P2	200650	209025	174400	211831	139445	124572	81473.9	181750	334572	-0.06	0.2	-0.08	0.52	0.69	1.3	0.14	-0.74	1	0.999923	1	0.988979	0.989239	0.7137	1	0.0522975
LysoPC(24:1(15Z))	C32 H64 N O7 P	1.04945e+06	220226	94345.6	59699.3	1.48616e+06	1.6215e+06	1.04086e+06	1.34609e+06	784983	2.25	3.48	4.14	-0.5	-0.63	0.01	-0.36	0.42	0.0248624	0.00773841	0.00474422	0.967065	0.872135	0.999774	1	0.783685
PEG Monooleate n4	C26 H50 O6	848152	743941	600947	580670	441279	506137	454661	796555	221152	0.19	0.5	0.55	0.94	0.74	0.9	0.09	1.94	0.661781	0.0391858	0.0189383	0.000297777	0.000249099	6.48192e-05	1	8.47518e-10
[Similar to: Palmitoyl sphingomyelin; ΔMass: 118.9894 Da]	C46 H80 N O9 P	652467	58610.6	43722.5	39708.9	443934	424134	569223	922616	411338	3.48	3.9	4.04	0.56	0.62	0.2	-0.5	0.67	0.0663724	0.0346797	0.0323016	0.972827	0.990134	0.999999	0.623621	1
	C21 H49 N4 O P	349996	46225.6	20948.4	18019.7	273551	250698	160332	260550	175319	2.92	4.06	4.28	0.36	0.48	1.13	0.43	1	0.395116	0.225254	0.181991	0.999998	1	0.956854	0.991194	1
Linoelaidic Acid	C18 H32 O2	505394	138568	187159	87316.5	390789	365976	418069	436027	400155	1.87	1.43	2.53	0.37	0.47	0.27	0.21	0.34	0.349135	0.287037	0.126476	0.999999	1	0.968762	1	0.999215
	C36 H63 N P2	15904.9	208171	48186.2	53828.8	55964.9	76572.5	219537	61936.1	41764.2	-3.71	-1.6	-1.76	-1.82	-2.27	-3.79	-1.96	-1.39	0.999997	0.985042	0.994522	0.990876	0.998974	0.987138	0.982743	0.971786
		135477	151820	340344	134971	133832	186704	162599	119642	126932	-0.16	-1.33	0.01	0.02	-0.46	-0.26	0.18	0.09	0.997947	0.00536582	1	1	0.999932	0.993684	1	1
		55470.3	97733.5	176964	44325.4	57516.2	53185.7	84591.8	65356.7	58554.3	-0.82	-1.67	0.32	-0.05	0.06	-0.61	-0.24	-0.08	0.999601	0.0326505	1	1	0.999996	0.998827	0.999999	1
Anhydrovitamin A	C20 H28	552834	31337.9	16780	17458.5	239047	389179	25752	740056	73211.4	4.14	5.04	4.98	1.21	0.51	4.42	-0.42	2.92	0.000811996	0.000555347	0.000562575	0.517735	0.816259	0.00227187	1	0.000391284
	C24 H23 N7 O2	1.1752e+06	727531	557012	581987	526188	613351	592890	1.10713e+06	326970	0.69	1.08	1.01	1.16	0.94	0.99	0.09	1.85	0.0253512	0.000243107	0.00043984	0.00581334	0.0149371	9.23431e-05	0.999824	8.18558e-08
	C37 H67 N5 O2	471162	40201.9	45748.7	22866.2	273061	271121	203522	346788	143279	3.55	3.36	4.36	0.79	0.8	1.21	0.44	1.72	0.518473	0.290996	0.22703	1	0.999998	0.975073	0.997805	0.972537
	C21 H29 Cl N O3 P S	598443	189913	75922.2	82472.4	148287	354650	173524	518025	79431.3	1.66	2.98	2.86	2.01	0.75	1.79	0.21	2.91	0.010771	0.000243321	0.000405262	0.0555041	0.242568	0.0290743	0.996047	3.96796e-05
	C24 H32 N2	59848.3	46139.4	9312.97	9317.54	30779.3	59580.1	229870	26084.4	16592.4	0.38	2.68	2.68	0.96	0.01	-1.94	1.2	1.85	0.617082	0.531489	0.487215	0.920072	0.999988	1	0.657629	0.322158
DL-Dipalmitoylphosphatidylcholine	C40 H80 N O8 P	858472	227556	126472	81559	943801	1.46595e+06	765347	1.04259e+06	832707	1.92	2.76	3.4	-0.14	-0.77	0.17	-0.28	0.04	0.0922913	0.0520305	0.0225988	0.999963	0.784296	0.999985	0.998773	0.999954
3-hydroxytetradecanoylcarnitine	C21 H41 N O5	459036	103089	56873.2	33255.5	456792	506050	505376	456908	310292	2.15	3.01	3.79	0.01	-0.14	-0.14	0.01	0.56	0.241202	0.112495	0.077213	0.999426	0.998035	1	0.999997	0.998811
	C70 H139 N O3 S2	44327.4	42852.7	104131	101597	75052.3	108256	37285	54283.7	97629.8	0.05	-1.23	-1.2	-0.76	-1.29	0.25	-0.29	-1.14	0.99982	0.999827	0.999988	0.999996	1	0.999774	1	0.969958
	C26 H60 N5 P	2.93101e+06	746832	166893	128722	3.47127e+06	3.64436e+06	2.6342e+06	2.89694e+06	1.79256e+06	1.97	4.13	4.51	-0.24	-0.31	0.15	0.02	0.71	0.0100177	0.000867018	0.000464264	0.998512	0.943862	1	0.999974	0.563314
[Similar to: 1-(3-methoxy-4-{[(2S,3R,4S,5S,6R)-3,4,5-trihydroxy-6-({[(2R,3R,4R,5R,6S)-3,4,5-trihydroxy-6-methyloxan-2-yl]oxy}methyl)oxan-2-yl]oxy}phenyl)ethan-1-one; ΔMass: 37.2868 Da]	C31 H61 N O4	1.38303e+06	287030	131454	61743.8	1.62032e+06	1.46898e+06	1.05873e+06	1.19693e+06	772502	2.27	3.4	4.49	-0.23	-0.09	0.39	0.21	0.84	0.366175	0.209322	0.167743	0.999796	0.999086	0.999953	1	0.996042
	C21 H35 N O4	459526	114989	54795.7	32674.6	647709	606321	616387	392666	330899	2	3.07	3.81	-0.5	-0.4	-0.42	0.23	0.47	0.578286	0.373198	0.305812	0.934177	0.989686	0.999731	1	0.99763
[Similar to: 2-(3,4-dihydroxyphenyl)-5,7-dihydroxy-3-{[(2S,3R,4S,5S)-3,4,5-trihydroxyoxan-2-yl]oxy}-4H-chromen-4-one; ΔMass: 84.3106 Da]	C26 H55 N4 O4 P	420038	87352.9	36021.3	21045.6	454148	454697	238787	307626	269886	2.27	3.54	4.32	-0.11	-0.11	0.81	0.45	0.64	0.686545	0.453106	0.340011	1	0.999999	0.996714	0.9763	0.999999
3-(Hexacosanoyloxy)-4-(trimethylammonio)butanoate	C33 H65 N O4	1.63383e+06	495843	305921	228019	1.58886e+06	1.84392e+06	1.74489e+06	1.90666e+06	1.32513e+06	1.72	2.42	2.84	0.04	-0.17	-0.09	-0.22	0.3	0.409271	0.212407	0.146557	0.999939	1	1	0.999998	0.996754
	C29 H57 N5 O6	316655	289454	289016	287656	257543	735166	263665	275536	2.5876e+06	0.13	0.13	0.14	0.3	-1.22	0.26	0.2	-3.03	0.984855	0.98829	0.982339	0.985874	0.999998	0.977873	0.99233	0.0722448
	C66 H102 S	239409	121223	109841	132714	116758	94448.2	170033	228594	242547	0.98	1.12	0.85	1.04	1.34	0.49	0.07	-0.02	0.99886	0.996931	0.99911	0.99908	0.91751	1	1	1
		3.01815e+06	761650	312132	317769	2.86511e+06	2.51246e+06	1.85949e+06	4.76448e+06	1.91118e+06	1.99	3.27	3.25	0.08	0.26	0.7	-0.66	0.66	0.00852151	0.00181053	0.0014086	0.707854	0.927199	0.692085	0.840041	0.73331
1-oleoyl-2-(4Z,7Z,10Z,13Z,16Z,19Z-docosahexaenoyl)-sn-glycerol	C43 H70 O5	382936	270732	120110	87057.2	415790	328527	2.68638e+06	560345	496440	0.5	1.67	2.14	-0.12	0.22	-2.81	-0.55	-0.37	1	0.999202	0.996651	0.999993	0.999896	1.40681e-05	1	1
		1.15698e+06	272417	139832	110834	429402	626945	1.14168e+06	1.63071e+06	1.3859e+06	2.09	3.05	3.38	1.43	0.88	0.02	-0.5	-0.26	0.934948	0.782723	0.785114	1	0.999977	0.999971	0.975059	0.999967
	C50 H81 N8 O2 P3	838215	454628	86101.1	61837.1	1.07007e+06	1.46389e+06	1.4189e+06	4.34193e+06	1.757e+06	0.88	3.28	3.76	-0.35	-0.8	-0.76	-2.37	-1.07	0.080555	0.0338793	0.0204708	0.611296	0.834739	0.890699	0.00093528	0.991745
	C12 H26 N2 O2 S2	24782.3	23361.4	13969.3	17016.4	30750.1	32998.2	26766.8	33793.2	45435.6	0.09	0.83	0.54	-0.31	-0.41	-0.11	-0.45	-0.87	0.995698	0.964904	0.978409	0.999641	0.996262	0.98218	0.999808	0.97049
	C37 H68 N6 O4	570224	410447	707131	354877	354167	522656	356602	362925	377197	0.47	-0.31	0.68	0.69	0.13	0.68	0.65	0.6	0.999129	0.999705	1	0.995871	0.324311	0.98828	0.999596	0.99331
		1.36853e+06	617158	400286	485482	984075	725011	708397	1.15898e+06	1.3839e+06	1.15	1.77	1.5	0.48	0.92	0.95	0.24	-0.02	0.672507	0.467551	0.468721	0.999979	1	0.999505	1	0.999998
N-Undecanoylglycine	C13 H25 N O3	621765	609934	442092	462109	463749	756729	606977	367458	679035	0.03	0.49	0.43	0.42	-0.28	0.03	0.76	-0.13	1	0.999501	0.999995	0.999997	0.986497	1	0.999999	0.921667
[Similar to: Monoolein; ΔMass: 123.0091 Da]	C26 H37 N7 O2	2.42819e+06	626253	178545	92391	3.17444e+06	2.9958e+06	2.24161e+06	2.11271e+06	1.23235e+06	1.96	3.77	4.72	-0.39	-0.3	0.12	0.2	0.98	0.0235606	0.00577818	0.00315278	0.999226	0.996607	0.999512	0.999999	0.79201
	C30 H65 N4 O3 P	1.1442e+06	341250	184305	50765.5	1.56484e+06	1.32765e+06	708841	1.54322e+06	802016	1.75	2.63	4.49	-0.45	-0.21	0.69	-0.43	0.51	0.508697	0.241997	0.180045	0.990394	0.999992	0.79606	0.971897	0.962632
[Similar to: (2S,3S,4S,8R,9S,13R,14R,15R,16R)-3,4,8,14,15-pentahydroxy-2,13,16-trimethyl-6-methylidene-10-oxatetracyclo[7.6.1.0Â?,â·.0ÂaÂ?,Âaâ¶]hexadecan-11-one; ΔMass: 234.3445 Da]	C32 H70 N6 O2 S	1.37343e+06	415277	292287	241431	525352	480978	849540	1.71857e+06	989206	1.73	2.23	2.51	1.39	1.51	0.69	-0.32	0.47	0.361938	0.115949	0.0882726	0.660842	0.843907	0.989416	0.949425	1
[Similar to: 3-(2-bromo-5-methoxyphenyl)-2-[2-(4-fluorophenyl)hydrazono]-3-oxopropanenitrile; ΔMass: 240.4535 Da]	C25 H62 N9 O6 P	331747	378944	358941	231967	370334	323088	257795	272938	2.2731e+06	-0.19	-0.11	0.52	-0.16	0.04	0.36	0.28	-2.78	0.994669	0.992074	0.985605	0.993441	1	0.984405	0.987294	0.116642
[Similar to: Palmitoyl sphingomyelin; ΔMass: 80.9112 Da]	C36 H66 N9 O8 P	117371	40548.7	33089.4	29394.8	77032.3	73898.3	1.2785e+06	131561	109734	1.53	1.83	2	0.61	0.67	-3.45	-0.16	0.1	0.997382	0.985272	0.980079	0.999901	0.999811	5.07939e-08	1	0.999926
[Similar to: Palmitoyl sphingomyelin; ΔMass: -53.1358 Da]	C35 H59 N3 O8	1.56562e+06	915222	613417	698262	1.11158e+06	1.09358e+06	1.20539e+06	1.78781e+06	2.61585e+06	0.77	1.35	1.16	0.49	0.52	0.38	-0.19	-0.74	0.973794	0.901829	0.892977	0.986934	0.989474	0.999185	1	0.279272
1-tetracosanoyl-sn-glycero-3-phosphocholine	C32 H66 N O7 P	2.30055e+06	545094	207265	82774.6	2.93519e+06	4.01374e+06	2.49468e+06	3.6706e+06	1.46403e+06	2.08	3.47	4.8	-0.35	-0.8	-0.12	-0.67	0.65	0.168478	0.0769358	0.0509696	0.997747	0.948595	0.999989	0.992605	0.99935
	C31 H68 N6 O2 S	398830	85108.9	34516.4	44020.9	144827	125054	118226	261620	293106	2.23	3.53	3.18	1.46	1.67	1.75	0.61	0.44	0.993765	0.986386	0.990435	0.995901	0.905921	1	1	1
	C37 H64 N6 O3	1.43598e+06	963256	500629	379602	824563	1.18018e+06	1.74205e+06	2.22301e+06	1.68266e+06	0.58	1.52	1.92	0.8	0.28	-0.28	-0.63	-0.23	0.553975	0.12931	0.0763253	0.861472	0.941798	1	0.89065	0.999561
cis-5-Tetradecenoylcarnitine	C21 H39 N O4	931881	191492	146291	61253.5	1.38943e+06	1.59282e+06	1.20696e+06	1.08633e+06	696789	2.28	2.67	3.93	-0.58	-0.77	-0.37	-0.22	0.42	0.289266	0.165312	0.119061	0.639248	0.651848	0.997869	0.999998	0.994539
		234878	69224.6	61329.3	47819.7	135660	93186.3	79858.2	247621	231489	1.76	1.94	2.3	0.79	1.33	1.56	-0.08	0.02	0.999831	0.999633	0.999468	0.979825	0.829887	1	1	0.999954
		525642	329983	289292	301899	387306	346209	421842	501485	1.41975e+06	0.67	0.86	0.8	0.44	0.6	0.32	0.07	-1.43	0.999792	0.999828	0.997918	0.996992	0.994498	1	1	0.0155746
LysoPC(20:5(5Z,8Z,11Z,14Z,17Z))	C28 H48 N O7 P	1.32759e+06	262501	130263	67965.6	2.05119e+06	1.93576e+06	1.17033e+06	1.37917e+06	726765	2.34	3.35	4.29	-0.63	-0.54	0.18	-0.05	0.87	0.138362	0.0496961	0.0333954	0.846671	0.813814	1	0.999999	0.850062
(2S)-1-Hydroxy-3-(pentadecanoyloxy)-2-propanyl (9Z)-9-hexadecenoate	C34 H64 O5	557404	42463.5	36483.9	31876.6	403319	350291	328835	408750	351696	3.71	3.93	4.13	0.47	0.67	0.76	0.45	0.66	0.303002	0.163581	0.150335	0.991766	0.99527	0.808228	1	0.963966
	C44 H87 N O9 P2	51915.9	49584.7	51638.5	45434.2	54447.7	36077.2	34973.8	63847.3	95371	0.07	0.01	0.19	-0.07	0.53	0.57	-0.3	-0.88	0.959396	0.965919	0.964931	1	0.999998	0.957287	0.965073	0.953247
	C35 H74 N8 O4 P2 S	1.32436e+06	319297	133151	60006.1	2.21322e+06	2.57217e+06	1.25506e+06	1.44554e+06	924644	2.05	3.31	4.46	-0.74	-0.96	0.08	-0.13	0.52	0.118908	0.0442137	0.0316332	0.805482	0.638276	0.999803	0.99997	0.95578
[Similar to: Gabapentin; ΔMass: 203.1884 Da]	C20 H42 N2 O4	2.47075e+06	2.21655e+06	3.11641e+06	5.22804e+06	2.94674e+06	2.30731e+06	3.53019e+06	2.34756e+06	3.43946e+06	0.16	-0.33	-1.08	-0.25	0.1	-0.51	0.07	-0.48	0.994597	1	0.392663	0.999984	1	0.999953	0.999945	0.999982
1-Stearoyl-2-hydroxy-sn-glycero-3-PE	C23 H48 N O7 P	2.48572e+06	499682	243222	136769	4.25196e+06	3.74554e+06	2.36702e+06	2.90128e+06	1.39221e+06	2.31	3.35	4.18	-0.77	-0.59	0.07	-0.22	0.84	0.0169967	0.00536173	0.00279406	0.769949	0.880686	1	1	0.851347
[Similar to: 1,4:3,6-Dianhydro-2,5-dideoxy-2-{5-[3-(dimethylamino)phenoxy]-1H-tetrazol-1-yl}-5-[(1-naphthylcarbamoyl)amino]-L-iditol; ΔMass: 16.1496 Da]	C28 H47 N5 O4	309515	271100	197480	223975	143816	148580	156733	261393	981628	0.19	0.65	0.47	1.11	1.06	0.98	0.24	-1.67	0.999754	0.993435	0.998805	0.985091	0.984559	0.976427	0.999851	0.00644613
[Similar to: (2R,3R,4S,5S,6R)-2-[(3Z)-hex-3-en-1-yloxy]-6-(hydroxymethyl)oxane-3,4,5-triol; ΔMass: 37.0345 Da]	C14 H26 N3 O2 P	422240	216463	129253	135769	572311	427135	207006	302026	6.77049e+06	0.96	1.71	1.64	-0.44	-0.02	1.03	0.48	-4	1	1	1	1	1	1	1	0.000285732
	C23 H31 N	2.07302e+06	1.07927e+06	665306	783426	796892	1.19923e+06	1.06773e+06	1.86334e+06	389262	0.94	1.64	1.4	1.38	0.79	0.96	0.15	2.41	0.00711354	5.15983e-05	0.00024025	0.00742255	0.0242238	0.00404848	0.990425	9.21167e-08
Isovalerylglycine	C7 H13 N O3	54283.6	31445.8	27752.5	28150.5	28850.1	30192.7	31223.9	37753.5	36562.1	0.79	0.97	0.95	0.91	0.85	0.8	0.52	0.57	0.88342	0.999576	0.999578	0.999941	0.999999	0.999934	1	0.999591
(+)-Nootkatone	C15 H22 O	318258	352160	290880	395217	347758	353886	392582	313846	601827	-0.15	0.13	-0.31	-0.13	-0.15	-0.3	0.02	-0.92	0.999999	0.999975	1	1	1	1	0.99992	0.174993
	C21 H47 N7 O9 P2	24449.7	11552.2	6980.09	9372.52	57208.2	34445.2	18406.1	25805.4	881668	1.08	1.81	1.38	-1.23	-0.49	0.41	-0.08	-5.17	1	1	1	1	1	1	1	6.02729e-08
	C43 H83 N O3	655511	252795	88073	86503.5	425604	400847	1.1935e+06	2.00477e+06	639757	1.37	2.9	2.92	0.62	0.71	-0.86	-1.61	0.04	0.697148	0.433628	0.407293	0.933503	0.871018	0.861518	0.0559823	0.999978
[Similar to: (1R,2R,4S,16R,17R,20S)-2-hydroxy-13,20-dimethoxy-4,7,17,22,22-pentamethyl-5,10,21,23-tetraoxahexacyclo[18.2.1.0Âa,Âaâ·.0â´,Âaâ¶.0â¶,Âaâ´.0â¸,ÂaÂ?]tricosa-6,8(12),13-trien-11-one; ΔMass: 185.2567 Da]	C33 H65 N5 O8	266979	260315	251461	173972	254907	257122	190928	176809	1.81624e+06	0.04	0.09	0.62	0.07	0.05	0.48	0.59	-2.77	0.973054	0.977615	0.953595	0.973376	1	0.977431	0.976881	0.221348
[Similar to: (2R,3R,4R,5R,6S)-2-{[(2R,3S,4S,5R,6R)-6-(benzyloxy)-3,4,5-trihydroxyoxan-2-yl]methoxy}-6-methyloxane-3,4,5-triol; ΔMass: 111.2358 Da]	C27 H53 N5 O5	911459	283466	901763	294584	379870	373240	368647	358276	2.74833e+06	1.69	0.02	1.63	1.26	1.29	1.31	1.35	-1.59	0.94027	0.999529	0.939051	0.971822	1	0.984961	0.962558	0.0870489
	C37 H83 N7 O11	2.00505e+06	634449	410900	237764	1.96527e+06	1.60004e+06	2.18404e+06	5.86329e+06	1.62548e+06	1.66	2.29	3.08	0.03	0.33	-0.12	-1.55	0.3	0.173488	0.0766508	0.0338296	0.568941	0.779498	0.909847	0.15439	0.996277
	C64 H113 N O6	234295	47543.8	44708.6	46564.4	58427.4	42110.7	89367.3	238468	184758	2.3	2.39	2.33	2	2.48	1.39	-0.03	0.34	0.998176	0.995353	0.996549	0.983437	0.939557	1	1	1
	C19 H44 N6 O3 P2 S	641835	656798	530494	636983	485388	620856	307550	615940	395289	-0.03	0.27	0.01	0.4	0.05	1.06	0.06	0.7	0.68317	0.999984	1	0.998592	0.99968	0.996367	1	0.991056
		2.25284e+06	572767	141186	74357.4	1.07504e+06	1.22472e+06	1.45653e+06	3.44255e+06	1.69249e+06	1.98	4	4.92	1.07	0.88	0.63	-0.61	0.41	0.0387895	0.0107431	0.00602843	0.420145	0.54159	0.620428	0.0730335	0.992948
L-α-lysophosphatidylcholine	C22 H46 N O7 P	2.12186e+06	526415	265607	157606	3.18484e+06	2.9995e+06	2.23221e+06	2.54251e+06	1.72929e+06	2.01	3	3.75	-0.59	-0.5	-0.07	-0.26	0.3	0.00113575	0.000190065	6.34955e-05	0.867867	0.950051	0.999904	1	0.913582
[Similar to: Verbascoside A; ΔMass: -374.1378 Da]	C15 H20 O2 P2	10493.2	8495.24	8248.34	8601.85	9773.58	10181.1	9639.36	10112.9	1.47738e+06	0.3	0.35	0.29	0.1	0.04	0.12	0.05	-7.14	1	1	1	1	1	1	1	4.64064e-07
persin	C23 H40 O4	29120.1	18812.6	18015.2	18582.9	24549.8	24874.8	23267	27481	1.70353e+06	0.63	0.69	0.65	0.25	0.23	0.32	0.08	-5.87	1	1	1	1	1	1	1	2.03209e-06
		2.19533e+06	577392	389931	186502	1.84329e+06	1.97961e+06	1.68923e+06	2.19446e+06	1.74465e+06	1.93	2.49	3.56	0.25	0.15	0.38	0	0.33	0.0714844	0.00192596	0.000404215	0.987811	0.995588	0.757652	1	0.991166
	C41 H81 N O8 P2	18643.9	11715.3	13471.6	31346.6	14445.1	11209.5	12027.5	10825.8	10958.5	0.67	0.47	-0.75	0.37	0.73	0.63	0.78	0.77	0.921429	0.929734	0.938749	0.958281	0.999805	0.919441	0.925216	0.843131
[Similar to: 6-Hexanoyl-D-erythro-sphingosine; ΔMass: 446.2503 Da]	C50 H87 N O5 P2	665535	101731	40421	35139.5	383661	475920	856066	605375	374202	2.71	4.04	4.24	0.79	0.48	-0.36	0.14	0.83	0.359513	0.24601	0.200594	0.999826	0.999976	0.662373	0.999937	0.999937
[Similar to: Palmitoyl sphingomyelin; ΔMass: -11.0530 Da]	C33 H70 N7 O6 P	2.27444e+06	794740	393649	275553	1.45051e+06	3.23593e+06	3.11046e+06	4.48369e+06	1.83228e+06	1.52	2.53	3.05	0.65	-0.51	-0.45	-0.98	0.31	0.153836	0.0627011	0.0356694	0.930765	1	0.99999	0.957897	0.999979
	C13 H29 N	35517.4	52621	30974.9	38586.1	20709.3	39003.8	28185	48030.8	53276.3	-0.57	0.2	-0.12	0.78	-0.14	0.33	-0.44	-0.58	1	1	0.472399	1	1	1	1	1
		639241	223314	140401	139187	360798	167405	317954	540124	529354	1.52	2.19	2.2	0.83	1.93	1.01	0.24	0.27	0.997965	0.990001	0.993052	0.998133	0.677137	1	0.999967	1
	C23 H42 O5	22198.9	12695.3	12372.4	12278.3	25090.3	27613.8	23192.7	19648.2	2.07026e+06	0.81	0.84	0.85	-0.18	-0.31	-0.06	0.18	-6.54	1	1	1	1	1	1	1	2.60814e-06
	C39 H78 N2 O4 S	5.89054e+06	2.99877e+06	1.77126e+06	1.21008e+06	1.47591e+06	2.37427e+06	4.33925e+06	1.15362e+07	1.2578e+07	0.97	1.73	2.28	2	1.31	0.44	-0.97	-1.09	0.996707	0.936286	0.928262	0.951269	0.96554	0.999108	0.955788	0.186011
[Similar to: Palmitoyl sphingomyelin; ΔMass: -12.0372 Da]	C37 H75 N2 O7 P	1.61943e+06	431032	180862	92196.5	2.54749e+06	2.53646e+06	1.83317e+06	2.01716e+06	1.22063e+06	1.91	3.16	4.13	-0.65	-0.65	-0.18	-0.32	0.41	0.0467495	0.0117763	0.00683606	0.923991	0.911229	0.999999	1	0.92877
N-[(15Z)-3-hydroxytetracos-15-enoyl]sphingosine-1-phosphocholine	C47 H93 N2 O7 P	4.18234e+06	435097	422432	410699	2.25355e+06	3.25465e+06	3.69344e+06	6.39055e+06	1.89319e+06	3.26	3.31	3.35	0.89	0.36	0.18	-0.61	1.14	0.103185	0.0613406	0.059611	0.592523	0.914926	0.99263	0.907513	0.868967
	C31 H61 N O4	22165.3	20196.8	21700.6	21444.2	20862.1	21477.7	20517.8	20546.4	1.54487e+06	0.13	0.03	0.05	0.09	0.05	0.11	0.11	-6.12	1	1	1	1	1	1	1	2.49016e-06
Mycalamide A	C24 H41 N O10	27579.3	21628.6	12881.7	14325.3	45152.8	34212	17968.3	18050.9	785246	0.35	1.1	0.95	-0.71	-0.31	0.62	0.61	-4.83	1	1	1	1	1	1	1	7.86412e-07
		487910	117740	101263	104763	197236	186688	166166	333727	422682	2.05	2.27	2.22	1.31	1.39	1.55	0.55	0.21	0.998857	0.997976	0.998453	0.984225	0.923695	1	1	0.999982
	C16 H22 N2 O S	7665.87	7035.43	7042.47	7084.93	7569.57	7308.69	7665.72	7293.97	1.58097e+06	0.12	0.12	0.11	0.02	0.07	0	0.07	-7.69	1	1	1	1	1	1	1	1.12318e-06
	C56 H103 N O6	1.53006e+06	393699	190252	185527	884692	727304	932889	1.90277e+06	1.57204e+06	1.96	3.01	3.04	0.79	1.07	0.71	-0.31	-0.04	0.900011	0.832033	0.921625	0.999982	0.958457	0.999922	0.999978	1
		2.00873e+06	614633	717478	871607	994665	751469	1.2865e+06	1.24588e+06	1.29382e+06	1.71	1.49	1.2	1.01	1.42	0.64	0.69	0.63	0.999943	1	1	0.999785	1	0.999974	0.999999	1
	C50 H102 N4 O2 P2 S2	858433	225017	272690	169471	316522	363553	817284	1.14016e+06	1.13077e+06	1.93	1.65	2.34	1.44	1.24	0.07	-0.41	-0.4	0.979603	0.931427	0.924674	0.999562	1	1	0.999689	0.999937
[Similar to: Azaspiracid-10; ΔMass: -36.0183 Da]	C57 H63 N3 S	1.2678e+06	1.33669e+06	1.18614e+06	1.0156e+06	1.22502e+06	1.17837e+06	1.46523e+06	1.10302e+06	2.80341e+06	-0.08	0.1	0.32	0.05	0.11	-0.21	0.2	-1.14	1	0.999998	0.999336	1	1	1	0.999613	0.178593
		169430	51900.3	56429.9	56773.4	53325.5	74279.6	69763.1	134134	146804	1.71	1.59	1.58	1.67	1.19	1.28	0.34	0.21	0.999964	0.999937	0.999975	0.97592	0.848544	1	1	1
[Similar to: Nervonic acid; ΔMass: 175.1218 Da]	C32 H63 N O5	1.68234e+06	246882	219588	67458.1	1.32763e+06	1.20128e+06	986995	1.14922e+06	558419	2.77	2.94	4.64	0.34	0.49	0.77	0.55	1.59	0.128353	0.0377757	0.0142769	1	0.999999	0.955539	0.920484	0.685355
	C24 H47 N5 O3	415396	348249	428840	448242	375520	402122	324559	349463	437447	0.25	-0.05	-0.11	0.15	0.05	0.36	0.25	-0.07	0.699481	0.932405	0.861632	0.7829	1	0.708921	0.831165	0.749029
	C27 H47 N	519919	180224	87215.6	113554	140907	239145	280582	767364	914728	1.53	2.58	2.19	1.88	1.12	0.89	-0.56	-0.82	0.98414	0.802451	0.842723	0.889405	0.96309	0.998826	0.78864	0.0603652
	C36 H60 N O3 P	1.13499e+06	816976	775502	755929	863248	849733	815345	1.01126e+06	1.22687e+06	0.47	0.55	0.59	0.39	0.42	0.48	0.17	-0.11	0.772122	0.501478	0.697403	0.601832	0.681974	0.49706	0.977901	0.999532
[Similar to: NP-013366; ΔMass: -38.0660 Da]	C26 H53 N O7 P2 S	2.6447e+06	608869	246266	138332	3.78012e+06	3.89767e+06	2.91243e+06	2.90196e+06	1.87483e+06	2.12	3.42	4.26	-0.52	-0.56	-0.14	-0.13	0.5	0.000567167	7.52178e-05	3.23394e-05	0.951255	0.443154	1	1	0.587298
[Similar to: NP-013366; ΔMass: -53.8660 Da]	C29 H64 N9 P	2.30055e+06	545094	207265	72808.1	2.93519e+06	4.01374e+06	2.49468e+06	3.6706e+06	1.46403e+06	2.08	3.47	4.98	-0.35	-0.8	-0.12	-0.67	0.65	0.16846	0.0737459	0.0495916	0.997749	0.948628	0.999989	0.99261	0.999351
	C26 H50 N2 O2	208955	91113	89820.1	72228.6	51521.6	79431.9	32386.1	29417	135878	1.2	1.22	1.53	2.02	1.4	2.69	2.83	0.62	0.757582	1	1	0.999999	1	0.999961	0.999949	0.998713
	C15 H42 N9 O P	224465	140010	194052	172156	150785	168146	163714	238592	192535	0.68	0.21	0.38	0.57	0.42	0.46	-0.09	0.22	0.979182	0.991725	0.999591	0.994541	1	0.988479	0.996175	0.984652
	C29 H62 N5 O5 P	1.82298e+06	1.23604e+06	1.00602e+06	1.0142e+06	890698	1.21806e+06	1.26402e+06	1.85224e+06	371864	0.56	0.86	0.85	1.03	0.58	0.53	-0.02	2.29	0.0671847	0.00196155	0.00201915	0.0012099	0.011085	0.0492967	0.999851	1.44646e-08
[Similar to: Palmitoyl sphingomyelin; ΔMass: 28.0025 Da]		1.499e+06	260107	144426	81749.8	348305	466047	4.42985e+06	1.99205e+06	722523	2.53	3.38	4.2	2.11	1.69	-1.56	-0.41	1.05	0.980823	0.964431	0.943523	0.993411	0.995468	0.000102152	0.996697	1
	C36 H48 N3 O3 P	73403.3	39923.4	32839	29953.7	97205.6	89543.4	71066.7	78787.1	4.02652e+06	0.88	1.16	1.29	-0.41	-0.29	0.05	-0.1	-5.78	1	1	1	1	1	1	1	0.00019426
		2.02829e+06	472617	175023	122098	910712	711960	723031	834675	1.23222e+06	2.1	3.53	4.05	1.16	1.51	1.49	1.28	0.72	0.737269	0.393637	0.505888	0.985957	0.999975	0.99972	0.969232	0.999986
[Similar to: NP-013366; ΔMass: -178.0489 Da]	C21 H44 N5 O3 P	139202	20151.1	12547.2	11207.2	323327	257439	413329	125163	97369.5	2.79	3.47	3.63	-1.22	-0.89	-1.57	0.15	0.52	0.400727	0.251702	0.227487	0.234894	0.91296	0.00164649	0.999999	0.996425
	C24 H39 O P3	16416.8	17699.6	17040.2	16894	16359.1	18050.5	16427.4	16318.2	1.1439e+06	-0.11	-0.05	-0.04	0.01	-0.14	0	0.01	-6.12	1	1	1	1	1	1	1	7.41474e-05
		384442	111083	118555	93174.7	154861	136171	150402	335911	247109	1.79	1.7	2.04	1.31	1.5	1.35	0.19	0.64	0.997984	0.998052	0.99725	0.995704	0.892447	1	1	1
	C33 H73 N5 O13	1.23636e+06	64521.6	50394.7	46214.6	772626	731599	2.36491e+06	2.55626e+06	955992	4.26	4.62	4.74	0.68	0.76	-0.94	-1.05	0.37	0.510182	0.316425	0.312812	0.984235	0.955414	0.0931174	0.518182	1
[Similar to: 13,14-Dihydro-15-keto Prostaglandin A2 ; ΔMass: 207.2572 Da]	C32 H63 N O5	1.44912e+06	288847	192728	68133.2	1.47369e+06	1.35141e+06	909701	983171	621928	2.33	2.91	4.41	-0.02	0.1	0.67	0.56	1.22	0.125437	0.036194	0.0130896	1	1	0.975962	0.9175	0.778114
	C36 H69 N O6	1.15958e+06	52738.9	24575.1	16130.9	513139	613221	384720	669341	384390	4.46	5.56	6.17	1.18	0.92	1.59	0.79	1.59	0.326966	0.169404	0.150426	0.999831	0.999894	0.861822	0.916605	0.999955
	C27 H39 N O6	12720.2	10931.8	44729.5	36754.3	13829.6	15295.2	11493.7	12733.9	2.46137e+06	0.22	-1.81	-1.53	-0.12	-0.27	0.15	0	-7.6	1	1	1	1	1	1	1	3.41847e-06
	C23 H27 N4 O P S3	17034.4	15018.9	14191.2	14603.2	16717.9	16349.6	16883.8	16081.8	1.65389e+06	0.18	0.26	0.22	0.03	0.06	0.01	0.08	-6.6	1	1	1	1	1	1	1	6.68669e-06
	C55 H74 N10 O4	860857	781052	813691	612602	642972	578973	680503	716016	893114	0.14	0.08	0.49	0.42	0.57	0.34	0.27	-0.05	0.999996	0.995576	0.992641	0.950217	0.873415	0.95398	0.997798	0.999144
	C45 H75 N3 O12	19471.1	17176.9	16727.4	15927.6	18230.2	19240.5	18757.8	18215.7	4.39041e+06	0.18	0.22	0.29	0.1	0.02	0.05	0.1	-7.82	1	1	1	1	1	1	1	2.13976e-05
	C25 H46 O7	38192.2	28088.6	26936.5	23496	40656.7	43648.8	34194.3	37894	1.51107e+06	0.44	0.5	0.7	-0.09	-0.19	0.16	0.01	-5.31	1	1	1	1	1	1	1	0.000109215
	C28 H59 N3 O2	204621	68222.6	87846.1	78626.2	39004.1	66767.5	28346.2	31463.3	132743	1.58	1.22	1.38	2.39	1.62	2.85	2.7	0.62	0.880255	0.999999	1	0.999995	1	0.999853	0.99976	0.998086
[Similar to: NP-003749; ΔMass: 91.1575 Da]	C24 H50 N O8 P	1.99533e+06	418906	158589	86303.7	2.0863e+06	2.20412e+06	1.81979e+06	1.71742e+06	1.42307e+06	2.25	3.65	4.53	-0.06	-0.14	0.13	0.22	0.49	0.0027657	0.000384758	0.000165391	0.999884	0.999957	0.999248	1	0.985573
1-[(8Z,11Z,14Z)-icosatrienoyl]-sn-glycero-3-phosphocholine	C28 H52 N O7 P	2.27989e+06	466443	203756	114369	3.19744e+06	2.912e+06	1.85188e+06	2.03956e+06	1.2422e+06	2.29	3.48	4.32	-0.49	-0.35	0.3	0.16	0.88	0.0236663	0.00595467	0.00301868	0.538845	0.651859	1	0.999986	0.742411
	C30 H32 N4 O5	10734.1	8050.77	7875.84	8468.43	12420.1	11040.9	9779.04	8801.56	1.91375e+06	0.42	0.45	0.34	-0.21	-0.04	0.13	0.29	-7.48	1	1	1	1	1	1	1	1.19501e-06
[Similar to: Nervonic acid; ΔMass: 456.2471 Da]	C41 H79 N10 O5 P	60498.1	24025.4	20916.6	22611.5	22657.1	22192.8	24210.4	79237.3	1.59466e+06	1.33	1.53	1.42	1.42	1.45	1.32	-0.39	-4.72	1	1	1	1	1	1	1	3.36651e-07
	C19 H35 N5 O7	284520	182739	188710	164846	99829.6	141214	97546.3	95027.6	85526.3	0.64	0.59	0.79	1.51	1.01	1.54	1.58	1.73	0.727208	0.699016	0.679838	0.576259	0.999979	0.591017	0.466702	0.432445
	C32 H57 N5 O2	206304	102468	197180	233072	157299	129211	1.18931e+06	250694	118309	1.01	0.07	-0.18	0.39	0.68	-2.53	-0.28	0.8	0.999961	1	1	1	0.99963	2.6011e-05	1	0.999622
[Similar to: NP-013366; ΔMass: 124.1716 Da]	C36 H74 N7 O7 P	3.22173e+06	424703	85767.1	58298.2	3.90441e+06	4.00203e+06	2.87545e+06	3.74967e+06	2.05933e+06	2.92	5.23	5.79	-0.28	-0.31	0.16	-0.22	0.65	0.0197304	0.00809462	0.00657311	1	0.999725	0.986471	0.99994	0.915169
1-icosanoyl-sn-glycero-3-phosphocholine	C28 H58 N O7 P	2.46104e+06	463640	250931	113329	3.73552e+06	3.59182e+06	2.90986e+06	2.76089e+06	1.58262e+06	2.41	3.29	4.44	-0.6	-0.55	-0.24	-0.17	0.64	0.368471	0.169716	0.137689	0.634247	0.597747	0.998833	0.999999	0.999535
		271104	75077.5	48657.4	38200.6	170390	111530	59625.7	250174	225978	1.85	2.48	2.83	0.67	1.28	2.18	0.12	0.26	0.99978	0.998983	0.999265	0.981798	0.96266	1	1	1
		916210	179352	115942	149314	432869	377987	376634	1.26792e+06	598074	2.35	2.98	2.62	1.08	1.28	1.28	-0.47	0.62	0.765985	0.668321	0.743735	1	0.994147	1	0.999996	1
[Similar to: 5,5'-[(6Z)-6-Tetradecene-1,14-diyl]bis(1,3-benzenediol); ΔMass: 390.2745 Da]	C40 H71 N10 O5 P	126047	93542.9	53506.3	59044.6	96327.7	139381	65006.2	197508	459015	0.43	1.24	1.09	0.39	-0.15	0.96	-0.65	-1.86	1	0.999983	0.999994	1	1	1	0.997914	0.0686322
	C23 H49 N	374846	438124	336718	356207	377429	438451	453904	326332	2.04343e+06	-0.23	0.15	0.07	-0.01	-0.23	-0.28	0.2	-2.45	1	1	1	1	0.999946	1	0.999999	7.1135e-05
(2S)-2-[(11Z)-11-Icosenoyloxy]-3-(pentadecanoyloxy)propyl (4Z,7Z,10Z,13Z,16Z,19Z)-4,7,10,13,16,19-docosahexaenoate	C60 H102 O6	1.80536e+06	1.78714e+06	1.55355e+06	1.61531e+06	1.55332e+06	1.55927e+06	1.54419e+06	1.79248e+06	364979	0.01	0.22	0.16	0.22	0.21	0.23	0.01	2.31	0.998732	0.750111	0.827729	0.52845	0.790322	0.49974	1	1.83115e-10
PEG Monooleate n5	C28 H54 O7	2.09479e+06	1.99149e+06	1.68708e+06	1.61568e+06	1.29204e+06	1.43306e+06	1.2776e+06	2.03359e+06	596488	0.07	0.31	0.37	0.7	0.55	0.71	0.04	1.81	0.988379	0.23843	0.176905	0.0021448	0.00202614	0.00054776	1	3.56537e-10
	C29 H55 N O8	474521	386591	316374	324121	269050	258424	256557	404848	1.26344e+06	0.3	0.58	0.55	0.82	0.88	0.89	0.23	-1.41	0.999513	0.99183	0.99679	0.97765	0.979461	0.974213	0.9999	0.00861169
[Similar to: NP-020238; ΔMass: -15.8645 Da]	C22 H36 O6	41547.6	1.51774e+06	1.55809e+06	1.56896e+06	42314.3	54936.7	51499.2	28995.6	367167	-5.19	-5.23	-5.24	-0.03	-0.4	-0.31	0.52	-3.14	6.48294e-10	2.2054e-09	3.03935e-10	1	0.999995	1	1	0.396475
	C61 H109 O P3	241969	69589.6	53978.4	68679.4	163610	96333.3	87809	406186	262347	1.8	2.16	1.82	0.56	1.33	1.46	-0.75	-0.12	0.999056	0.997981	0.999419	0.925556	0.88419	1	1	1
	C73 H127 N O6	1.6039e+06	1.6682e+06	1.47927e+06	1.24078e+06	1.43385e+06	1.36178e+06	1.3773e+06	1.66831e+06	559059	-0.06	0.12	0.37	0.16	0.24	0.22	-0.06	1.52	0.999845	0.999999	0.798784	0.956551	0.69855	0.901517	0.999989	4.76235e-05
	C42 H70 O12 P2	110211	115427	84803.3	105354	80192	107185	56185.7	97413.7	58025.1	-0.07	0.38	0.07	0.46	0.04	0.97	0.18	0.93	0.454851	1	1	1	1	0.999999	1	0.999981
	C13 H37 N7 O P2 S	426157	198656	125050	189657	117551	167564	165225	128708	142938	1.1	1.77	1.17	1.86	1.35	1.37	1.73	1.58	0.449708	0.314372	0.487826	0.314054	0.999812	0.483968	0.299955	0.242549
1-Palmitoyl-2-hydroxy-sn-glycero-3-PE	C21 H44 N O7 P	2.26409e+06	542962	248800	109381	2.35387e+06	2.13717e+06	1.71987e+06	2.08598e+06	1.37456e+06	2.06	3.19	4.37	-0.06	0.08	0.4	0.12	0.72	0.00534548	0.000824654	0.000334616	0.99989	0.999911	0.999578	0.999999	0.678959
	C44 H70 N4 O5 P2	24357.8	17731.1	19591.4	22005.9	20491.5	19203.5	21569.4	18028.9	24656.5	0.46	0.31	0.15	0.25	0.34	0.18	0.43	-0.02	0.916787	0.81082	0.775045	0.997835	0.999743	0.995303	0.999999	0.995271
	C26 H55 N4 O6 P3	148355	140952	118390	110891	74799.3	97385	76372.2	96262.1	83676.1	0.07	0.33	0.42	0.99	0.61	0.96	0.62	0.83	0.78261	0.999937	0.999963	0.998933	0.999968	0.99972	0.999141	0.999347
	C24 H51 N4 O5 P3	214386	174166	140531	143962	109815	141389	134628	112150	109258	0.3	0.61	0.57	0.97	0.6	0.67	0.93	0.97	0.764781	0.999959	0.999994	0.998637	0.999982	0.998927	0.99931	0.999393
	C16 H37 N O4 P2 S2	617812	548634	476773	481509	456787	451325	472461	588500	141872	0.17	0.37	0.36	0.44	0.45	0.39	0.07	2.12	0.930486	0.170258	0.169687	0.119405	0.075003	0.0523321	0.999745	4.3551e-09
[Similar to: NP-003749; ΔMass: 421.4840 Da]	C50 H87 N3 O7	3.83754e+06	797684	292817	229552	1.56933e+06	1.58287e+06	2.23259e+06	7.00716e+06	2.27585e+06	2.27	3.71	4.06	1.29	1.28	0.78	-0.87	0.75	0.0632418	0.0173146	0.0105561	0.36906	0.425065	0.998999	0.00192361	0.999781
	C47 H94 Cl N4 O3 P S2	3.10662e+06	976192	517975	247737	2.75745e+06	2.77932e+06	4.3747e+06	5.09647e+06	2.97335e+06	1.67	2.58	3.65	0.17	0.16	-0.49	-0.71	0.06	0.0300352	0.00965035	0.00536445	0.812294	0.963038	0.999998	0.694111	1
Indapamide	C16 H16 Cl N3 O3 S	10086.5	11208.9	7789.99	9553.75	10841.9	9032.32	10080	8356.56	35027.9	-0.15	0.37	0.08	-0.1	0.16	0	0.27	-1.8	0.999762	0.999357	0.999157	0.999716	0.999965	1	1	1
	C46 H74 N3 O3 P3	149314	52372.2	42403.9	33945.1	94188.8	93470.8	963417	231299	119881	1.51	1.82	2.14	0.66	0.68	-2.69	-0.63	0.32	0.998672	0.996002	0.993704	0.999991	0.999995	8.7578e-09	0.998519	1
	C35 H39 N3 O2	145735	126337	147992	147647	71226.7	109173	97408.5	74388.9	55193.1	0.21	-0.02	-0.02	1.03	0.42	0.58	0.97	1.4	0.844124	0.823612	0.794975	0.718153	1	0.805195	0.638233	0.363548
	C39 H74 O3	111680	59429.5	28122.1	32709.2	45007	63441.5	33615.5	148588	120852	0.91	1.99	1.77	1.31	0.82	1.73	-0.41	-0.11	0.999991	0.999958	0.999969	0.968164	0.927776	0.999999	1	0.999983
[Similar to: (2R,3R,4R,5R,6S)-2-{[(2R,3S,4S,5R,6R)-6-(benzyloxy)-3,4,5-trihydroxyoxan-2-yl]methoxy}-6-methyloxane-3,4,5-triol; ΔMass: 67.2092 Da]	C25 H49 N5 O4	1.11016e+06	370553	355433	353100	378298	417260	331052	380950	2.32948e+06	1.58	1.64	1.65	1.55	1.41	1.75	1.54	-1.07	0.923693	0.960782	0.976057	0.931913	1	0.899899	0.935989	0.161081
	C26 H50 N2 O3	78581.6	10965.2	9122.47	8311.48	12321.2	10613.3	10490	9332.26	11514.8	2.84	3.11	3.24	2.67	2.89	2.91	3.07	2.77	0.715113	0.999999	1	0.999999	1	0.99997	0.999953	0.999108
Glucosylceramide (d18:1/16:0)	C40 H77 N O8	357355	54701	26771.2	24144.1	93188.1	68051.6	81631.9	696407	305889	2.71	3.74	3.89	1.94	2.39	2.13	-0.96	0.22	0.684758	0.486056	0.449276	0.755919	0.757119	0.645105	0.985582	1
	C38 H73 N O2	2.78275e+06	1.14512e+06	310780	357335	5.41924e+06	5.27398e+06	4.34987e+06	4.68272e+06	3.42936e+06	1.28	3.16	2.96	-0.96	-0.92	-0.64	-0.75	-0.3	0.434222	0.0838034	0.0919618	0.963749	0.948775	0.991667	0.958195	1
	C44 H91 O9 P	414083	72197.6	65412.7	62741.6	187638	114284	185989	315197	363337	2.52	2.66	2.72	1.14	1.86	1.15	0.39	0.19	0.969687	0.977181	0.9743	0.999692	0.91436	0.999997	0.999992	1
	C34 H66 N2 O7	1.13192e+06	323389	216999	219241	957763	1.11621e+06	1.65311e+06	1.73064e+06	1.42826e+06	1.81	2.38	2.37	0.24	0.02	-0.55	-0.61	-0.34	0.109106	0.0246413	0.0195862	0.98913	0.999748	0.997138	0.661809	0.99999
	C26 H35 N O5	10617	9801.33	10826.3	10840.7	11377.8	11175.4	9484.88	10325.9	1.02915e+06	0.12	-0.03	-0.03	-0.1	-0.07	0.16	0.04	-6.6	1	1	1	1	1	1	1	7.48505e-06
		2.72174e+06	1.02673e+06	526405	289167	1.39618e+06	1.84863e+06	2.25349e+06	1.11437e+07	3.48919e+06	1.41	2.37	3.23	0.96	0.56	0.27	-2.03	-0.36	0.780293	0.453119	0.387466	0.782449	0.902172	0.986686	0.000285446	0.95081
	C36 H75 O2 P3	417045	397484	481366	469743	257850	379095	232880	291536	286216	0.07	-0.21	-0.17	0.69	0.14	0.84	0.52	0.54	1	0.810209	0.996111	0.999797	0.593882	0.998939	0.999824	0.999589
3, 5-Tetradecadiencarnitine	C21 H37 N O4	606866	112897	52466.6	30288.7	971021	998433	857146	505684	447564	2.43	3.53	4.32	-0.68	-0.72	-0.5	0.26	0.44	0.326074	0.171619	0.119267	0.625993	0.775916	0.993386	1	0.999997
(2R)-1-[(Hydroxy{[(1s,3R)-2,3,4,5,6-pentahydroxycyclohexyl]oxy}phosphoryl)oxy]-3-(palmitoyloxy)-2-propanyl (11Z,14Z)-11,14-icosadienoate	C45 H83 O13 P	352585	133914	107664	35410.4	104527	88541.2	102143	1.01471e+06	286997	1.4	1.71	3.32	1.75	1.99	1.79	-1.53	0.3	0.496948	0.348018	0.177536	0.391872	0.367641	0.375803	0.148236	0.999962
[Similar to: 5-OxoETE; ΔMass: 67.1512 Da]	C27 H47 N	1.62005e+06	556385	220156	93911.9	1.73496e+06	1.76342e+06	1.85818e+06	1.98552e+06	1.48669e+06	1.54	2.88	4.11	-0.1	-0.12	-0.2	-0.29	0.12	0.00244025	1.8206e-05	1.9181e-06	0.999967	1	0.999382	0.800078	0.991694
	C10 H12 N2 O S	12987.2	11432.5	9463.49	11316	14044.2	13478.4	13097.6	10978.8	1.09772e+06	0.18	0.46	0.2	-0.11	-0.05	-0.01	0.24	-6.4	1	1	1	1	1	1	1	2.14854e-06
4β-methylzymosterol-4-carbaldehyde	C29 H46 O2	850681	118760	63693	50526.3	395256	311331	49376.5	1.6928e+06	627822	2.84	3.74	4.07	1.11	1.45	4.11	-0.99	0.44	0.0158462	0.00331354	0.00285323	0.233786	0.471737	0.00376625	0.033974	0.913181
	C83 H98 N4 P2	419104	463831	383893	330683	265019	329356	187947	381300	598932	-0.15	0.13	0.34	0.66	0.35	1.16	0.14	-0.52	0.997158	0.916312	0.996935	0.776354	0.730134	0.349784	0.996795	0.994312
	C38 H74 N5 O11 P	1.15619e+06	246088	78207.5	37052.4	1.68364e+06	1.84193e+06	1.43866e+06	1.51312e+06	817994	2.23	3.89	4.96	-0.54	-0.67	-0.32	-0.39	0.5	0.0429964	0.0153405	0.0105028	0.989052	0.852748	1	0.999999	0.893837
12-Hydroxy-19-[(2Z)-4-hydroxy-3-methyl-2-buten-1-yl]-8,8,21,21-tetramethyl-5-(3-methyl-2-buten-1-yl)-3,7,20-trioxahexacyclo[15.4.1.0~2,15~.0~2,19~.0~4,13~.0~6,11~]docosa-4(13),5,9,11,15-pentaene-14,18 -dione	C33 H38 O7	30752.4	12509.8	11507.8	10618.6	43099.9	35119.1	29778.2	33395.2	1.64511e+06	1.3	1.42	1.53	-0.49	-0.19	0.05	-0.12	-5.74	1	1	1	1	1	1	1	7.2211e-07
	C52 H88 N2 O3 P2	22240.6	21832.2	20682.4	22132.7	22512	22161.6	22104.8	22223.6	1.09328e+06	0.03	0.1	0.01	-0.02	0.01	0.01	0	-5.62	1	1	1	1	1	1	1	6.36617e-07
3β-hydroxy-4β-methyl-5α-cholest-7-ene-4α-carboxylic acid	C29 H48 O3	1.10289e+06	187137	86392.5	43695.3	416292	432539	322714	1.58028e+06	629038	2.56	3.67	4.66	1.41	1.35	1.77	-0.52	0.81	0.000841922	8.44591e-05	5.25499e-05	0.0336146	0.0942419	0.00318977	0.00110422	0.745891
		386379	158249	100497	138519	493457	361516	392932	500586	652621	1.29	1.94	1.48	-0.35	0.1	-0.02	-0.37	-0.76	0.892704	0.778493	0.841243	0.999876	0.99995	0.999999	1	1
(2R)-2-[(4Z,7Z,10Z,13Z,16Z,19Z)-4,7,10,13,16,19-Docosahexaenoyloxy]-3-[(8Z,11Z,14Z)-8,11,14-icosatrienoyloxy]propyl 2-(trimethylammonio)ethyl phosphate	C50 H82 N O8 P	1.64179e+06	428477	165578	84243.7	912015	926307	946125	2.91249e+06	1.08096e+06	1.94	3.31	4.28	0.85	0.83	0.8	-0.83	0.6	0.0289352	0.00438938	0.00158345	0.575487	0.730595	0.972514	0.00136318	0.994355
(2R)-1-{[(2-Aminoethoxy)(hydroxy)phosphoryl]oxy}-3-hydroxy-2-propanyl docosanoate	C27 H56 N O7 P	1.82818e+06	362555	171746	40513.2	2.93697e+06	2.72565e+06	1.93631e+06	1.98221e+06	984978	2.33	3.41	5.5	-0.68	-0.58	-0.08	-0.12	0.89	0.126861	0.0542973	0.036068	0.884466	0.92719	1	0.999999	0.941897
[Similar to: {(3R,4S)-1-(Phenylacetyl)-3-[2-(4-phenyl-1-piperazinyl)ethyl]-4-piperidinyl}acetic acid; ΔMass: -111.0864 Da]	C21 H26 N2 S	1.28866e+06	367555	150103	159675	319382	750874	425633	1.09039e+06	182205	1.81	3.1	3.01	2.01	0.78	1.6	0.24	2.82	0.00425314	8.1069e-05	0.00011447	0.0208336	0.13357	0.019294	0.988997	1.35556e-05
	C32 H56 O5	1.41387e+06	395368	397592	141643	813025	779514	861866	612267	554417	1.84	1.83	3.32	0.8	0.86	0.71	1.21	1.35	0.755757	0.303891	0.11531	0.999942	0.999769	0.976458	0.639338	0.999377
	C46 H74 N2 O4	1.48831e+06	555875	365223	412954	417503	567082	734449	2.31821e+06	1.9681e+06	1.42	2.03	1.85	1.83	1.39	1.02	-0.64	-0.4	0.74927	0.307032	0.312916	0.40131	0.545431	0.913512	0.851652	0.229168
	C43 H81 N O2	469514	130895	37985.5	36903.9	241543	313500	918777	1.80227e+06	470746	1.84	3.63	3.67	0.96	0.58	-0.97	-1.94	0	0.673789	0.459127	0.47844	0.879538	0.951438	0.698823	0.0150193	0.999999
[Similar to: Palmitoyl sphingomyelin; ΔMass: -25.1051 Da]	C35 H68 N O9 P	560246	329926	148545	162660	301167	366542	396076	675779	1.14897e+06	0.76	1.92	1.78	0.9	0.61	0.5	-0.27	-1.04	0.981998	0.926413	0.893371	0.970205	0.982525	0.996626	1	0.175777
Linoleamide	C18 H33 N O	726413	229098	144314	112298	1.11947e+06	1.13171e+06	979381	640392	435718	1.66	2.33	2.69	-0.62	-0.64	-0.43	0.18	0.74	0.0574013	0.00687914	0.0049351	0.031893	0.115404	0.880204	0.999912	0.590032
	C36 H73 N3 O2	162672	272180	679925	200824	120113	249892	181085	141729	172091	-0.74	-2.06	-0.3	0.44	-0.62	-0.15	0.2	-0.08	0.827745	0.0163349	0.998051	0.999999	0.996945	0.999962	0.998855	1
	C40 H79 N O7 P2	120120	154388	188237	112734	103439	106055	84900.1	77122.7	998888	-0.36	-0.65	0.09	0.22	0.18	0.5	0.64	-3.06	0.980227	0.984859	0.963748	0.969223	0.999999	0.94374	0.959593	0.595261
	C79 H106 O7 S2	489374	478090	434764	400716	338214	268392	366644	473417	762238	0.03	0.17	0.29	0.53	0.87	0.42	0.05	-0.64	1	0.999996	0.999998	0.99587	0.942453	0.996485	1	0.119284
	C18 H35 N7 O3 S	14380.5	14376	12737.7	12765.9	13843.9	14074.8	13599.3	12733.2	1.14377e+06	0	0.18	0.17	0.05	0.03	0.08	0.18	-6.31	1	1	1	1	1	1	1	1.52919e-06
		318867	172818	38083.7	40765.3	140522	288709	167208	316800	334841	0.88	3.07	2.97	1.18	0.14	0.93	0.01	-0.07	0.999907	0.985767	0.997524	0.999977	0.89925	0.999911	0.998638	0.998869
	C18 H26 N2 O S	11167.8	8635.7	8347.52	8314.6	12262.8	12161.2	11819.3	10411.6	1.06819e+06	0.37	0.42	0.43	-0.13	-0.12	-0.08	0.1	-6.58	1	1	1	1	1	1	1	1.60613e-06
	C44 H91 O2 P3	450160	324729	420790	341557	308261	493466	372557	538881	460983	0.47	0.1	0.4	0.55	-0.13	0.27	-0.26	-0.03	0.982962	0.999472	0.992644	1	0.766574	1	1	1
Desbutylbupivacaine	C14 H20 N2 O	39384.9	42255.8	22800.7	28349.8	33677	34355.2	123065	30946	64048.3	-0.1	0.79	0.47	0.23	0.2	-1.64	0.35	-0.7	0.997218	0.991712	0.992225	0.996411	0.999027	0.999484	1	0.999946
	C32 H44 O6 S	48552.5	25985.1	20769.4	20785.2	68451.9	61220.9	51693	50354.6	2.65389e+06	0.9	1.23	1.22	-0.5	-0.33	-0.09	-0.05	-5.77	1	1	1	1	1	1	1	5.289e-06
[Similar to: NP-003749; ΔMass: 462.4933 Da]	C44 H86 N10 O8	949193	99958.4	46887.4	39717.5	261937	197112	247987	478550	98664.7	3.25	4.34	4.58	1.86	2.27	1.94	0.99	3.27	0.00954688	0.00406558	0.00362511	0.0905974	0.361202	0.320045	0.54721	0.00159443
	C40 H80 N2 O8	402128	333536	444536	289727	318426	631912	323008	392133	362162	0.27	-0.14	0.47	0.34	-0.65	0.32	0.04	0.15	0.998868	0.999999	1	0.999649	0.405172	0.999855	1	1
[Similar to: Irganox 1098; ΔMass: 369.1680 Da]	C64 H89 N5 O P2	441453	460716	450363	386818	341554	337712	378177	385128	491151	-0.06	-0.03	0.19	0.37	0.39	0.22	0.2	-0.15	1	0.999693	0.999986	0.976929	0.906784	0.961965	0.999326	0.996434
		1.26576e+06	173688	173777	202317	470338	522960	975186	1.62566e+06	1.77702e+06	2.87	2.86	2.65	1.43	1.28	0.38	-0.36	-0.49	0.595934	0.317076	0.389074	0.771824	0.99666	0.981793	0.953604	0.951116
[Similar to: NP-013366; ΔMass: -57.9210 Da]	C25 H61 N9 O P2	2.14173e+06	461404	225278	70679.9	2.6199e+06	2.93289e+06	1.87963e+06	2.68426e+06	1.57619e+06	2.21	3.25	4.92	-0.29	-0.45	0.19	-0.33	0.44	0.0510343	0.0191251	0.0122172	0.999629	0.93037	0.999944	1	0.913832
ANDILESIN A	C25 H32 O6	10917.7	9313.58	9338.16	10381.8	10640.5	10421.8	11213.5	10144.9	1.68692e+06	0.23	0.23	0.07	0.04	0.07	-0.04	0.11	-7.27	1	1	1	1	1	1	1	3.57268e-06
	C15 H37 N7 O2 S	20042.3	16924.7	19621.4	19112.4	17554.6	18103.1	20934	19896.9	938927	0.24	0.03	0.07	0.19	0.15	-0.06	0.01	-5.55	1	1	1	1	1	1	1	2.4017e-06
LysoPC(22:5(7Z,10Z,13Z,16Z,19Z))	C30 H52 N O7 P	687436	114868	50877.3	22914.6	1.0588e+06	949722	721328	661224	519000	2.58	3.76	4.91	-0.62	-0.47	-0.07	0.06	0.41	0.427241	0.262071	0.20892	0.695826	0.810616	0.999411	1	0.983665
[Similar to: 1-[(5-methyl-3-phenylisoxazol-4-yl)carbonyl]-1,2,3,4,6,10b-hexahydropyrimido[2,1-a]isoindol-6-one; ΔMass: 498.5678 Da]		1.20287e+06	1.02316e+06	885429	911305	771657	726010	503693	1.18585e+06	157648	0.23	0.44	0.4	0.64	0.73	1.26	0.02	2.93	0.621538	0.0693153	0.201824	0.000108384	0.000360752	3.74532e-05	0.99361	3.9353e-11
10-Hydroxy-4-isopropyl-7,13,13-trimethyl-18-oxapentacyclo[9.5.2.0~1,12~.0~2,9~.0~4,8~]octadeca-2(9),6-diene-3,5,17-trione	C23 H28 O5	12589.2	9623.71	9380.02	10273.7	11908.5	11667.3	12549.2	10154.6	1.25642e+06	0.39	0.42	0.29	0.08	0.11	0	0.31	-6.64	1	1	1	1	1	1	1	5.4561e-07
[Similar to: 16-{[(2R,3R,4S,5S,6R)-4,5-dihydroxy-6-(hydroxymethyl)-3-{[(2S,3R,4R,5R,6S)-3,4,5-trihydroxy-6-methyloxan-2-yl]oxy}oxan-2-yl]oxy}-5',7,9,13-tetramethyl-5-oxaspiro[pentacyclo[10.8.0.0Â?,âa.0â´,â¸.0ÂaÂl,Âaâ¸]icosane-6,2'-piperidine]-3-one; ΔMass: -312.0826 Da]	C26 H43 N5	30214.4	40675.6	53926.9	39822.8	34915.6	33401.2	60537.3	25576.5	26350.4	-0.43	-0.84	-0.4	-0.21	-0.14	-1	0.24	0.2	0.693434	0.856102	0.974023	0.672253	0.835361	0.986101	0.741141	0.56482
[Similar to: Psychosine; ΔMass: 210.1990 Da]	C39 H69 N5 O4	415515	27694.9	27432.1	25249.3	384277	575591	604919	619778	358169	3.91	3.92	4.04	0.11	-0.47	-0.54	-0.58	0.21	0.201817	0.177447	0.173725	0.999955	1	0.999775	0.999999	0.996615
	C28 H48 N4	189817	15838.9	16394.7	15593.9	267236	397038	206543	200903	84504.5	3.58	3.53	3.61	-0.49	-1.06	-0.12	-0.08	1.17	0.891401	0.874909	0.874043	0.815198	0.96141	0.999984	0.999988	0.991345
[Similar to: Palmitoyl sphingomyelin; ΔMass: 96.0851 Da]		1.53136e+06	442904	151793	94821.8	2.38033e+06	2.04838e+06	2.44016e+06	4.3221e+06	1.52845e+06	1.79	3.33	4.01	-0.64	-0.42	-0.67	-1.5	0	0.247032	0.146117	0.111863	0.982663	0.998294	0.988582	0.812228	1
	C45 H91 N O4 S	2.94644e+06	3.67849e+06	4.54773e+06	4.43526e+06	4.19769e+06	4.0394e+06	3.54495e+06	3.14461e+06	3.31564e+06	-0.32	-0.63	-0.59	-0.51	-0.46	-0.27	-0.09	-0.17	0.999994	0.999879	0.184128	1	0.999996	0.999997	1	1
[Similar to: 1-[1,1'-biphenyl]-4-yl-2-(2-methyl-4-nitro-1H-imidazol-1-yl)-1-ethanol; ΔMass: 290.4017 Da]	C36 H71 N O6	958692	96132.2	73564	25799.2	615826	633784	424110	723463	262981	3.32	3.7	5.22	0.64	0.6	1.18	0.41	1.87	0.38103	0.176565	0.119908	0.999914	0.999935	0.87413	0.98638	0.888688
	C21 H23 O2 P	16544.7	19307.4	11150.9	13124.2	14108.9	17373.8	16326.3	14141.5	56921.5	-0.22	0.57	0.33	0.23	-0.07	0.02	0.23	-1.78	0.999968	0.999651	0.999598	0.980894	0.999954	0.99998	1	0.999999
	C46 H91 O2 P3	398095	199069	126658	128315	166626	169541	195994	378232	326026	1	1.65	1.63	1.26	1.23	1.02	0.07	0.29	0.995173	0.989566	0.98733	0.999635	0.918906	0.999991	1	1
	C30 H62 Br Cl N2 O	7063.97	6115.91	5106.37	6285.97	6643.36	7288.4	7922.27	5783.56	494928	0.21	0.47	0.17	0.09	-0.05	-0.17	0.29	-6.13	1	1	1	1	1	1	1	0.555294
	C45 H94 N O4 P3	3.11755e+06	511765	273932	94556	1.3747e+06	1.70822e+06	1.81771e+06	6.34062e+06	2.92363e+06	2.61	3.51	5.04	1.18	0.87	0.78	-1.02	0.09	0.123297	0.0658504	0.0467032	0.444422	0.632248	0.693315	0.0151993	1
	C55 H95 O P3	1.05348e+06	221856	226153	174439	480995	469137	595586	849871	887991	2.25	2.22	2.59	1.13	1.17	0.82	0.31	0.25	0.872093	0.862624	0.850225	0.999938	0.978595	0.999993	1	0.999907
	C55 H102 O7 S2	1.00301e+06	286565	122688	188029	542948	405692	271057	624810	732667	1.81	3.03	2.42	0.89	1.31	1.89	0.68	0.45	0.0453532	0.0209076	0.0413236	0.695167	0.328447	0.202918	0.925523	0.975521
	C14 H32 N9 P	55989.3	79980.1	74797.2	35303.2	39636.1	52108.5	51852.9	56150.9	677626	-0.51	-0.42	0.67	0.5	0.1	0.11	0	-3.6	1	1	1	1	1	1	1	1.64388e-05
	C17 H26 N P S	352023	43009.5	43922.3	22895.2	577233	689864	550431	461152	187790	3.03	3	3.94	-0.71	-0.97	-0.64	-0.39	0.91	0.738826	0.617971	0.563041	0.694837	0.839238	0.985569	1	0.997447
		851705	257391	86483	78912.7	371533	386044	940519	1.52068e+06	683067	1.73	3.3	3.43	1.2	1.14	-0.14	-0.84	0.32	0.790666	0.441721	0.409213	0.978955	0.99766	0.996267	0.963227	1
	C42 H77 O5 P	709999	404448	167829	124020	159041	270124	365111	984127	1.48309e+06	0.81	2.08	2.52	2.16	1.39	0.96	-0.47	-1.06	0.991865	0.812955	0.821077	0.721764	0.845535	0.970259	0.933576	0.577
		2.14532e+06	640816	510022	492319	1.52018e+06	940505	4.20856e+06	1.7699e+06	3.50395e+06	1.74	2.07	2.12	0.5	1.19	-0.97	0.28	-0.71	0.999999	0.999883	0.999858	0.99907	0.99656	0.997523	0.999999	0.239756
[Similar to: NP-005406; ΔMass: 6.1512 Da]	C30 H59 N5 O6	566933	545621	548414	540844	556810	534197	513925	545260	3.19006e+06	0.06	0.05	0.07	0.03	0.09	0.14	0.06	-2.49	1	1	1	1	1	0.999999	1	0.000108899
	C17 H40 N5 O3 P	959062	199067	120290	52641.8	1.40739e+06	1.47783e+06	1.18356e+06	1.04785e+06	542375	2.27	3	4.19	-0.55	-0.62	-0.3	-0.13	0.82	0.425816	0.225502	0.165782	0.427649	0.559429	0.958926	1	0.999665
(E)-doxepin	C19 H21 N O	90704.9	127846	61163.1	110469	86350.2	72711.7	72117.8	49626.8	154193	-0.5	0.57	-0.28	0.07	0.32	0.33	0.87	-0.77	1	1	1	0.923601	0.970016	0.995292	0.999982	0.999822
	C45 H88 N5 O3 P	1.46792e+06	1.60002e+06	1.48334e+06	1.39409e+06	1.21591e+06	1.05465e+06	1.14175e+06	1.41971e+06	241614	-0.12	-0.02	0.07	0.27	0.48	0.36	0.05	2.6	0.995424	1	0.999898	0.0966112	0.0268531	0.172286	0.999804	1.63281e-12
	C22 H43 P S	269239	51129.2	36247.6	37285.8	472663	294432	280524	169950	329114	2.4	2.89	2.85	-0.81	-0.13	-0.06	0.66	-0.29	0.601781	0.584989	0.522131	0.483025	1	1	0.873515	0.999994
	C61 H99 N4 P S	568785	151851	103607	94548.2	220248	362674	689932	918643	956540	1.91	2.46	2.59	1.37	0.65	-0.28	-0.69	-0.75	0.96816	0.867715	0.875873	0.996981	1	1	0.850247	0.906822
	C24 H43 N O6	59707.7	1.66393e+06	1.7417e+06	1.78074e+06	68167.2	63343.6	70310.6	40704.9	404792	-4.8	-4.87	-4.9	-0.19	-0.09	-0.24	0.55	-2.76	1.02207e-12	8.22786e-13	8.19234e-13	1	1	1	1	0.0905817
	C28 H46 N5 O4 P	452019	210294	153066	139742	272158	424421	339674	766537	1.06605e+06	1.1	1.56	1.69	0.73	0.09	0.41	-0.76	-1.24	0.993686	0.987552	0.984663	0.998611	0.999709	0.999984	1	0.459846
		605652	105782	96110.6	77908.5	268691	218918	381866	783757	394913	2.52	2.66	2.96	1.17	1.47	0.67	-0.37	0.62	0.821127	0.960433	0.849023	0.998473	0.999802	0.99969	0.999517	0.999799
	C38 H75 N O6	865243	174250	136346	35637.7	462842	461581	373396	818002	355409	2.31	2.67	4.6	0.9	0.91	1.21	0.08	1.28	0.725664	0.543004	0.382002	0.999975	0.999997	0.952113	0.999983	0.991164
	C34 H26 N5 O5 P	18148.7	18189.6	23774	21569.7	17712.8	20627.3	1.69867e+06	16661.6	18374.9	0	-0.39	-0.25	0.04	-0.18	-6.55	0.12	-0.02	1	1	1	1	1	0.0001183	1	1
	C33 H66 N2 O8	824055	180288	185074	32336	389141	386132	332866	683237	349816	2.19	2.15	4.67	1.08	1.09	1.31	0.27	1.24	0.654655	0.366016	0.270264	0.998351	0.998704	0.901231	0.999897	0.974648
[Similar to: 1-[(5-methyl-3-phenylisoxazol-4-yl)carbonyl]-1,2,3,4,6,10b-hexahydropyrimido[2,1-a]isoindol-6-one; ΔMass: 322.3750 Da]	C36 H73 N O11	1.9063e+06	1.84384e+06	1.66475e+06	1.8058e+06	1.57483e+06	1.53988e+06	1.56448e+06	1.8133e+06	489920	0.05	0.2	0.08	0.28	0.31	0.29	0.07	1.96	0.999997	0.794899	0.906971	0.341664	0.144924	0.073817	0.99999	1.60094e-11
[Similar to: Palmitoyl sphingomyelin; ΔMass: 79.9391 Da]		920558	395720	296384	167669	994322	849453	653052	844414	948363	1.22	1.64	2.46	-0.11	0.12	0.5	0.12	-0.04	0.499208	0.178465	0.0213135	0.992825	0.99955	1	1	0.999968
[Similar to: Irgafos 168; ΔMass: 0.0996 Da]	C37 H70 N6 O3	524402	489427	473306	473560	494709	557975	587305	534110	591391	0.1	0.15	0.15	0.08	-0.09	-0.16	-0.03	-0.17	0.998591	0.998652	0.998912	0.999374	0.999971	1	0.999996	0.974572
	C36 H78 N5 O4 P	1.59186e+06	1.62286e+06	1.30929e+06	1.25371e+06	1.08089e+06	1.13659e+06	943838	1.49468e+06	228533	-0.03	0.28	0.34	0.56	0.49	0.75	0.09	2.8	0.999839	0.472582	0.402639	0.0166887	0.0164536	0.00780864	1	1.02819e-11
		1.30651e+06	185084	100215	86822.2	989388	1.01841e+06	1.11772e+06	1.79464e+06	1.00595e+06	2.82	3.7	3.91	0.4	0.36	0.23	-0.46	0.38	0.22214	0.135472	0.125614	0.933324	0.969533	0.963755	0.971529	0.999732
	C35 H68 O3	94637	23451.2	22228.9	25694.7	43086.9	26289.1	24217.9	140013	112113	2.01	2.09	1.88	1.14	1.85	1.97	-0.57	-0.24	0.999942	0.999936	0.99995	0.982248	0.903179	1	1	0.999999
		625704	150585	130667	150225	155295	275057	670428	1.05197e+06	1.06268e+06	2.05	2.26	2.06	2.01	1.19	-0.1	-0.75	-0.76	0.949602	0.876977	0.906733	0.999987	0.999952	0.999998	0.952617	0.876327
[Similar to: 1-Linoleoyl glycerol; ΔMass: 231.2203 Da]	C35 H63 N5 O2	1.48561e+06	353713	254079	65824.2	1.13335e+06	1.0313e+06	910656	857943	601576	2.07	2.55	4.5	0.39	0.53	0.71	0.79	1.3	0.153251	0.0264062	0.00769481	0.999965	0.999998	0.938959	0.716587	0.894141
		296769	110656	98068	123927	111075	125836	293065	735340	655431	1.42	1.6	1.26	1.42	1.24	0.02	-1.31	-1.14	0.995274	0.961676	0.974142	0.999918	1	1	0.984735	0.878648
	C30 H54 N9 O2 P3	348965	261204	263069	261016	488937	382509	802766	526682	364067	0.42	0.41	0.42	-0.49	-0.13	-1.2	-0.59	-0.06	0.990417	0.9828	0.978395	0.999959	1	0.999902	0.99997	0.999907
	C54 H100 N6 O4	388541	126202	119622	114876	175402	86903.6	171240	427665	301197	1.62	1.7	1.76	1.15	2.16	1.18	-0.14	0.37	0.996958	0.994808	0.996758	0.999045	0.979408	1	1	0.999975
	C27 H48 N10 O9	105535	80276.2	82024.6	85643.6	50388.8	65717.6	46393.8	68550.2	50140.1	0.39	0.36	0.3	1.07	0.68	1.19	0.62	1.07	0.666998	1	1	0.999814	1	0.999046	0.999914	0.999879
	C37 H73 N O5	922373	418299	268221	216177	353341	548021	766043	1.19021e+06	642410	1.14	1.78	2.09	1.38	0.75	0.27	-0.37	0.52	0.645241	0.302113	0.236138	0.868098	0.99909	1	0.857502	1
EPTC	C9 H19 N O S	37732.2	39853.8	20775.2	24338.5	6953.51	16626.4	14532.7	75984.1	14284.3	-0.08	0.86	0.63	2.44	1.18	1.38	-1.01	1.4	0.50603	1	1	1	1	0.999894	0.999999	1
	C35 H63 N5 O2	1.42898e+06	270661	280531	69921.8	1.10986e+06	985694	916062	889169	627030	2.4	2.35	4.35	0.36	0.54	0.64	0.68	1.19	0.42588	0.122349	0.0435605	0.999998	0.999999	0.956389	0.921348	0.946873
(2S)-1-Hydroxy-3-(pentadecanoyloxy)-2-propanyl (9Z,12Z,15Z)-9,12,15-octadecatrienoate	C36 H64 O5	512245	81379.9	92382.3	16019.1	363849	336645	276857	246559	199456	2.65	2.47	5	0.49	0.61	0.89	1.05	1.36	0.486707	0.310141	0.212887	1	1	0.993661	0.910233	0.865704
	C38 H64 N4	595997	259020	165137	47190.4	124513	149111	127367	1.11443e+06	373041	1.2	1.85	3.66	2.26	2	2.23	-0.9	0.68	0.179046	0.0812717	0.0172114	0.0659825	0.0838683	0.0402685	0.245707	0.981149
	C27 H47 N O4	312738	52620.6	24388.4	13311.3	477588	427098	2.16572e+06	291352	175203	2.57	3.68	4.55	-0.61	-0.45	-2.79	0.1	0.84	0.755386	0.6242	0.582218	0.777737	0.889777	1.58784e-12	1	0.992845
	C24 H31 N O5	9267.96	8887.42	9009.71	10429.7	9597.7	9520.67	10153	9265.14	962279	0.06	0.04	-0.17	-0.05	-0.04	-0.13	0	-6.7	1	1	1	1	1	1	1	5.25645e-06
	C29 H70 N9 O8 P	200699	167539	235585	150488	126363	210611	135221	154649	1.41979e+06	0.26	-0.23	0.42	0.67	-0.07	0.57	0.38	-2.82	0.976832	0.978972	0.972583	0.959688	1	0.956963	0.966837	0.329773
	C38 H75 N O6	527433	173232	91377.9	35847.4	365990	463832	224492	480995	188152	1.61	2.53	3.88	0.53	0.19	1.23	0.13	1.49	0.869883	0.709457	0.621148	0.999997	1	0.977565	0.999973	0.993209
	C37 H69 N6 O2 P	1.0407e+06	204936	63716.9	33641.3	951412	1.15715e+06	868699	1.19331e+06	648452	2.34	4.03	4.95	0.13	-0.15	0.26	-0.2	0.68	0.0375217	0.0138293	0.00948847	0.999996	0.999992	1	0.999487	0.945405
	C25 H49 N P2	66961.7	31530.6	63320.4	47073.3	36077	54221	15003.5	62163.1	48750.4	1.09	0.08	0.51	0.89	0.3	2.16	0.11	0.46	0.820777	0.876183	0.924279	0.862873	1	0.805973	0.897975	0.752492
	C41 H81 N3 O3	375811	42661.2	39038	33130.7	160913	121484	919176	756831	143474	3.14	3.27	3.5	1.22	1.63	-1.29	-1.01	1.39	0.915469	0.961169	0.932003	0.995718	0.991417	0.000581607	0.251942	0.999898
		1.84793e+06	643433	811917	595193	978274	1.2342e+06	1.10177e+06	2.04461e+06	1.17669e+06	1.52	1.19	1.63	0.92	0.58	0.75	-0.15	0.65	0.974218	0.986856	0.947993	0.999998	0.998602	1	0.999999	1
	C24 H29 Cl P2 S4	16550	11358.8	9762.84	10443.8	28233.6	21827.9	18634	9843.01	67145.8	0.54	0.76	0.66	-0.77	-0.4	-0.17	0.75	-2.02	0.99942	0.99922	0.998914	0.995668	0.99953	1	1	1
		613015	203626	106787	192317	566095	415140	283406	786029	565684	1.59	2.52	1.67	0.11	0.56	1.11	-0.36	0.12	0.309146	0.190838	0.351117	0.98094	0.726391	0.782578	0.999987	1
	C43 H87 N3 O3	132289	29941.5	26961	26666.4	38513.9	40167.1	526563	466167	104698	2.14	2.29	2.31	1.78	1.72	-1.99	-1.82	0.34	0.998761	0.998466	0.999861	0.999529	0.99961	0.000157481	0.54667	0.999998
	C30 H60 N2 O2	92674.3	101342	105328	60077.4	66001.5	97961.6	82389.3	58667.5	585934	-0.13	-0.18	0.63	0.49	-0.08	0.17	0.66	-2.66	0.999808	0.999994	0.99999	0.999258	0.999511	1	0.996839	0.183517
	C46 H79 N2 O15 P	874481	401691	291740	174573	227034	183632	215884	1.35675e+06	813918	1.12	1.58	2.32	1.95	2.25	2.02	-0.63	0.1	0.0527384	0.00385032	0.0003907	0.00814846	0.0057538	0.00109287	0.220614	0.948043
	C30 H59 N O5	1.30113e+06	433464	356734	112159	1.52848e+06	1.56917e+06	1.06237e+06	796233	622774	1.59	1.87	3.54	-0.23	-0.27	0.29	0.71	1.06	0.626757	0.209071	0.0681617	1	1	0.999707	0.561297	0.977283
	C24 H46 N7 O5 P	1.53752e+06	176876	72075.3	14991.5	1.80397e+06	1.67204e+06	2.15191e+06	1.82467e+06	1.10998e+06	3.12	4.41	6.68	-0.23	-0.12	-0.49	-0.25	0.47	0.238913	0.147284	0.126158	0.300246	0.470554	0.834414	0.998465	0.999953
	C19 H33 N O4	655539	182115	94759.3	72454.5	843241	816058	791198	551002	422817	1.85	2.79	3.18	-0.36	-0.32	-0.27	0.25	0.63	0.0594339	0.020382	0.0105671	0.988327	0.985064	0.999981	0.999767	0.989881
(2Z)-3-(3,4,5-Trimethoxyphenyl)-2-propen-1-yl acetate	C14 H18 O5	15820.6	554166	576926	637949	14409.7	17673.3	15311	11186.6	442747	-5.13	-5.19	-5.33	0.13	-0.16	0.05	0.5	-4.81	3.25517e-12	1.18938e-12	9.18932e-13	1	1	1	1	6.69305e-11
	C30 H60 N3 O2 P S	387341	413648	260348	273123	360020	303173	237418	391534	266090	-0.09	0.57	0.5	0.11	0.35	0.71	-0.02	0.54	0.995027	0.749983	0.746025	0.92685	0.85451	0.459791	0.999238	0.600341
	C28 H54 N2 O2 S2	163328	58272.9	26483.2	20611.8	129528	110445	91586.3	100969	80696.4	1.49	2.62	2.99	0.33	0.56	0.83	0.69	1.02	0.124545	0.0077239	0.00335951	0.975374	0.928637	0.569192	0.671267	0.719455
	C21 H47 N4 O2 P	22020.7	18958.5	18297.3	20241	22547.4	46678.3	175836	18547.4	30064.8	0.22	0.27	0.12	-0.03	-1.08	-3	0.25	-0.45	0.995889	0.99559	0.996979	0.999668	1	0.0211393	0.999993	0.999656
Linoleyl ethanolamide	C20 H37 N O2	174424	45906	20758.5	11219.5	233977	244145	200265	150737	88526.6	1.93	3.07	3.96	-0.42	-0.49	-0.2	0.21	0.98	0.26954	0.119867	0.0860444	0.757074	0.654229	1	0.99998	0.953816
	C28 H30 P2	35938.1	14020.7	16224.2	17893.3	91439.5	89816.7	55377.6	42262.5	97441.3	1.36	1.15	1.01	-1.35	-1.32	-0.62	-0.23	-1.44	0.996955	0.998099	0.99877	0.185602	0.39551	0.992272	0.999877	0.00889897
	C32 H47 N O	129364	118407	103630	114576	59983	59137.8	24753.1	135627	20239	0.13	0.32	0.18	1.11	1.13	2.39	-0.07	2.68	0.999717	0.633934	0.980229	0.000294593	0.000493716	2.1241e-05	0.999899	2.53034e-08
	C33 H61 O2 P3	201310	54386.6	29250.3	36415.5	86830.2	75465	63331.9	86131.6	105008	1.89	2.78	2.47	1.21	1.42	1.67	1.22	0.94	0.0246003	0.00434129	0.00561027	0.175296	0.267676	0.0909955	0.389202	0.898081
	C8 H20 N4 O3 S2	91313.7	11197.9	7849.96	9422.37	11647.2	65084.1	16599.2	86801.3	47478.2	3.03	3.54	3.28	2.97	0.49	2.46	0.07	0.94	0.478505	0.0468522	0.0709788	0.39177	0.808452	0.415401	0.999513	0.67581
	C28 H40 N5 O3 P	117238	18733.3	10744.9	7412.56	135655	107164	107904	114593	66500.5	2.65	3.45	3.98	-0.21	0.13	0.12	0.03	0.82	0.402875	0.251675	0.17181	0.999978	0.999744	1	1	0.994366
	C22 H47 N4 O P	153402	46884.7	26837.8	17965.9	138077	152026	108826	68407.9	69219.4	1.71	2.51	3.09	0.15	0.01	0.5	1.17	1.15	0.51484	0.26401	0.155184	1	0.999998	0.998558	0.633702	0.996903
[Similar to: Nervonic acid; ΔMass: 613.3670 Da]	C51 H100 N9 O3 P3	189896	168698	160322	179717	126670	132374	112894	173613	30593.8	0.17	0.24	0.08	0.58	0.52	0.75	0.13	2.63	1	0.99252	0.99983	0.0533891	0.0337259	0.00373485	1	2.10586e-11
	C32 H63 N5 O5	87489	43496	88406.8	79165	40174.6	47568.8	24786.1	25850.4	111081	1.01	-0.02	0.14	1.12	0.88	1.82	1.76	-0.34	0.887025	1	0.999177	0.626707	0.89991	0.994917	0.585769	0.999977
	C18 H40 N5 P S2	33429.3	10104	8390.6	8138.48	48620.6	57410.7	98545.1	22979.9	24731.6	1.73	1.99	2.04	-0.54	-0.78	-1.56	0.54	0.43	0.927108	0.911188	0.895369	0.820782	0.657348	0.0365145	0.999957	0.999996
	C20 H37 N O	150035	31344.1	20553.6	17915.9	247679	239470	191585	147831	127647	2.26	2.87	3.07	-0.72	-0.67	-0.35	0.02	0.23	0.770182	0.648438	0.625314	0.779999	0.901725	0.999987	1	0.964153
	C28 H57 N4 O4 P	279713	19559.9	20039.9	19338.9	160153	169089	137741	173604	140313	3.84	3.8	3.85	0.8	0.73	1.02	0.69	1	0.8088	0.410047	0.391262	1	0.999979	0.961245	0.980971	1
	C24 H46 N5 P	183033	141441	122968	124530	76544.9	83917	61035	178036	22922.6	0.37	0.57	0.56	1.26	1.13	1.58	0.04	3	0.428716	0.0190298	0.0471815	5.93746e-05	0.000474619	9.83094e-06	0.99995	1.71456e-09
	C23 H33 N7 O	59926.6	28419.1	26820.7	25782.4	68423.9	104047	106457	22653	115411	1.08	1.16	1.22	-0.19	-0.8	-0.83	1.4	-0.95	1	0.999946	1	0.999994	0.539654	0.991708	1	0.485021
	C23 H43 N5 S	24489.5	28812	42002.9	119269	9821.08	15091.3	22479.2	11679.4	108184	-0.23	-0.78	-2.28	1.32	0.7	0.12	1.07	-2.14	0.999996	0.996578	0.614727	1	1	1	0.983421	0.0923497
	C14 H8 N2 S3	116120	12170.1	6581.96	7670.32	10364.8	75234	16844	86132.7	7071.18	3.25	4.14	3.92	3.49	0.63	2.79	0.43	4.04	0.0558598	0.00336807	0.010412	0.0501214	0.238011	0.21204	0.970392	0.000603203
	C23 H46 N O6 P	269245	45588	16658.9	15423.7	366906	372918	297776	299461	179503	2.56	4.01	4.13	-0.45	-0.47	-0.15	-0.15	0.58	0.00698858	0.00140623	0.00104702	0.992333	0.914572	0.999984	0.999917	0.681763
	C37 H52 N P	57497.4	32719.8	66083.7	78554.9	70578	57945.1	58783.6	63999.3	55649.6	0.81	-0.2	-0.45	-0.3	-0.01	-0.03	-0.15	0.05	0.902634	1	0.99994	1	1	0.999877	1	0.994138
Cetilistat	C25 H39 N O3	61328.6	13188.9	8512.47	10185.2	100201	123210	107382	57440.6	46836.9	2.22	2.85	2.59	-0.71	-1.01	-0.81	0.09	0.39	0.583521	0.446049	0.471025	0.934617	0.504347	0.973674	1	0.999861
	C30 H48 N O3 P	63489.2	42451.2	17244.3	17956.2	33542.4	40968.5	37595.3	45552.4	118385	0.58	1.88	1.82	0.92	0.63	0.76	0.48	-0.9	0.963629	0.724445	0.847771	0.951641	0.965068	0.934499	0.986979	0.144323
octahydrocurcumin	C21 H28 O6	34548.7	14307	8111.42	8709.82	58943.7	58311.2	114576	26027	24053.3	1.27	2.09	1.99	-0.77	-0.76	-1.73	0.41	0.52	0.984433	0.960125	0.957636	0.636259	0.676368	0.040899	0.999993	1
	C22 H39 N O4	171865	68088.4	67653.9	41966.2	258862	260294	219863	175502	113799	1.34	1.35	2.03	-0.59	-0.6	-0.36	-0.03	0.59	0.473793	0.210051	0.0813901	0.882988	0.710889	0.970157	0.999864	0.999894
		55034.5	102928	115952	54593.7	187069	180715	83945.5	43886.4	188679	-0.9	-1.08	0.01	-1.77	-1.72	-0.61	0.33	-1.78	0.997274	0.98764	1	0.196649	0.689296	0.994095	0.999999	0.0343156
[Similar to: 2-({[4-isopropoxy-2-(trifluoromethyl)-6-quinolyl]methyl}thio)-1H-benzo[d]imidazole; ΔMass: 64.2051 Da]	C22 H47 N3 O6 S	263943	52412.3	17487.3	16333.6	312258	295280	183229	247424	164130	2.33	3.92	4.01	-0.24	-0.16	0.53	0.09	0.69	0.00146376	0.000143197	0.000116242	0.99942	0.995452	0.876947	1	0.501552
[Similar to: N-(1,1-dioxotetrahydro-1H-1lambda~6~-thiophen-3-yl)-2,3-dihydro-1-benzofuran-5-sulfonamide; ΔMass: 164.3848 Da]	C28 H55 N3 O3	27781.4	32433.2	29365.1	74393	17404.4	13941.1	206853	11570.2	28722.8	-0.22	-0.08	-1.42	0.67	0.99	-2.9	1.26	-0.05	0.99388	0.999982	0.985163	0.999936	0.700959	0.0294285	1	0.987345
	C35 H71 N3 O10	204443	29550.8	27697.2	26470.3	178446	274956	283853	287088	182885	2.79	2.88	2.95	0.2	-0.43	-0.47	-0.49	0.16	0.184254	0.173994	0.166186	0.999996	1	0.999455	1	0.992518
	C27 H53 N3 O4 S	60733.4	11603.5	10821.4	11888.3	118659	74464	74452.4	36394.9	30524	2.39	2.49	2.35	-0.97	-0.29	-0.29	0.74	0.99	0.912697	0.912111	0.913874	0.307431	0.951735	0.970698	1	0.999444
	C18 H34 N2 O2	83121.9	24143.4	17704.7	15975.3	145541	154252	100108	74688.6	43609.3	1.78	2.23	2.38	-0.81	-0.89	-0.27	0.15	0.93	0.0156509	0.00576505	0.00744755	0.0134194	0.0206857	0.967497	0.999995	0.197118
rac-Etodolac	C17 H21 N O3	51152	11060.5	8905.21	9884.3	78859.1	53967.5	17462.6	53159.9	20293.7	2.21	2.52	2.37	-0.62	-0.08	1.55	-0.06	1.33	0.700353	0.61626	0.610239	0.970514	0.999994	0.955088	0.999991	0.995657
	C27 H26 N4 O	59120.5	118262	143609	176274	83562	80425.4	34788.6	46268.1	9153.11	-1	-1.28	-1.58	-0.5	-0.44	0.77	0.35	2.69	0.929858	0.0451142	0.0488484	0.577853	1	0.881918	0.856376	0.113334
	C28 H43 N7 O	169661	26123.4	25235.3	25715.6	139392	181839	121664	164644	105172	2.7	2.75	2.72	0.28	-0.1	0.48	0.04	0.69	0.0305816	0.0222017	0.0229113	1	0.999973	0.882018	1	0.787287
	C22 H43 N3 O3	86373.6	11647	8734.35	8049.53	187729	151042	42185.9	58152.6	34238.1	2.89	3.31	3.42	-1.12	-0.81	1.03	0.57	1.33	0.157734	0.0614136	0.0591692	0.00637415	0.0764514	0.998069	0.999696	0.708413
	C27 H54 N2 O S2	161810	146762	131563	116556	79965.8	68383.8	105658	165862	34880.9	0.14	0.3	0.47	1.02	1.24	0.61	-0.04	2.21	0.999998	0.637169	0.239372	6.78501e-05	0.000243247	0.0321727	0.999583	2.2415e-10
	C18 H36 N2 O2	117192	14649.3	10133.5	8897.95	199504	223824	130362	101879	63508.5	3	3.53	3.72	-0.77	-0.93	-0.15	0.2	0.88	0.0896778	0.0590984	0.0538701	0.0381372	0.0505477	0.988238	1	0.828327
[Similar to: Amphomycin; ΔMass: -692.4512 Da]	C38 H32 Cl N3 S	182468	183361	149117	157394	172891	163972	171727	172095	86009.1	-0.01	0.29	0.21	0.08	0.15	0.09	0.08	1.09	1	0.899084	0.898497	0.96897	0.88794	0.94412	0.999997	0.000120971
	C47 H74 N3 O2 P3	82286.3	59818.7	68494.1	69316.5	75189.9	73050.1	86880.3	63733.5	157409	0.46	0.26	0.25	0.13	0.17	-0.08	0.37	-0.94	0.999998	0.999982	0.999933	1	1	1	0.999808	0.46468
	C30 H72 N10 O9	296937	105130	99227.7	40067.4	441914	505831	215055	358180	237169	1.5	1.58	2.89	-0.57	-0.77	0.47	-0.27	0.32	0.00981806	0.00812323	0.00100063	0.861708	0.298092	0.994926	1	0.545749
7,8-Didehydro-4,5-epoxymorphinan-3,6-diol	C16 H17 N O3	25890.3	10169.5	8452.59	8492.68	9111.04	15852.9	8687.67	40554.2	11033.8	1.35	1.61	1.61	1.51	0.71	1.58	-0.65	1.23	0.215041	0.199677	0.203472	0.668118	0.755532	0.559983	0.999255	0.136721
	C22 H46 N2 O2	172552	29132.3	17818.9	15884.9	281808	305286	241498	188896	99361	2.57	3.28	3.44	-0.71	-0.82	-0.48	-0.13	0.8	0.245247	0.132395	0.124178	0.147824	0.223572	0.99646	0.999939	0.994778
	C29 H49 N3 P2 S	61226.8	8362.5	8549.13	8533.91	96355.2	104019	73527.9	66739.5	69786.2	2.87	2.84	2.84	-0.65	-0.76	-0.26	-0.12	-0.19	0.742907	0.58187	0.581501	0.925464	0.890117	0.999982	1	0.999889
		190883	195194	166913	188891	167843	150362	155891	182401	37459.3	-0.03	0.19	0.02	0.19	0.34	0.29	0.07	2.35	1	0.985246	0.999953	0.387881	0.124588	0.177465	1	1.90512e-11
	C24 H53 N8 O2 P	41994.2	26314	15554.5	21719.4	107422	108623	94851.7	26890.5	42868.4	0.67	1.43	0.95	-1.36	-1.37	-1.18	0.64	-0.03	0.732614	0.332036	0.421637	0.00446914	0.0342788	0.0433725	0.999972	0.99995
		9384.28	7746.46	6356.34	7362.51	12574.3	11270.6	9185.83	9769.01	128368	0.28	0.56	0.35	-0.42	-0.26	0.03	-0.06	-3.77	1	1	1	1	1	1	1	0.00114341
	C53 H89 N5 O5 S	172098	164172	166212	155314	132156	112878	124676	157189	22613.4	0.07	0.05	0.15	0.38	0.61	0.47	0.13	2.93	1	0.999677	0.998022	0.0304072	0.00437695	0.0423579	0.99992	9.59777e-12
[Similar to: NP-013296; ΔMass: 81.1807 Da]	C21 H45 N9 O6	229184	74508.6	35196.2	53184.8	193237	198475	151623	217108	163429	1.62	2.7	2.11	0.25	0.21	0.6	0.08	0.49	0.0414477	0.000603132	0.00120561	0.89764	0.992679	0.768116	0.999934	0.661696
		162130	147190	114226	110962	87778.4	95696	67879.5	157813	44365	0.14	0.51	0.55	0.89	0.76	1.26	0.04	1.87	0.947339	0.216107	0.3078	0.0142297	0.0230198	4.00488e-05	0.9996	4.13609e-08
	C32 H70 N5 O5 P	255110	22645.2	22812.6	20664.7	189753	176206	91791	251266	103500	3.49	3.48	3.63	0.43	0.53	1.47	0.02	1.3	0.31419	0.142492	0.116522	0.999879	1	0.876807	0.994763	0.882978
[Similar to: 3-(dimethylamino)-1-(5-methyl-3-phenyl-4-isoxazolyl)-2-propen-1-one; ΔMass: 302.1306 Da]	C36 H34 N2 O4	9878.71	6425.2	5783.91	5728.78	11234.1	9681.91	9132.37	7704.4	15460.9	0.62	0.77	0.79	-0.19	0.03	0.11	0.36	-0.65	0.999963	0.996815	0.995355	0.998572	0.998448	0.999999	1	0.999999
1-Palmitoyl-2-hydroxy-sn-glycero-3-PE	C21 H44 N O7 P	232760	77998.9	25900.7	11788.7	236233	210253	150511	200840	148963	1.58	3.17	4.3	-0.02	0.15	0.63	0.21	0.64	0.00669897	0.000331149	0.000114359	0.999997	0.999994	0.934793	0.999575	0.665467
Famprofazone	C24 H31 N3 O	29682.6	71642.2	53191.6	140451	23116.1	26302.2	27730.7	7527.2	15089.7	-1.27	-0.84	-2.24	0.36	0.17	0.1	1.98	0.98	0.978593	0.9653	0.0102836	1	0.999984	0.983258	0.842857	0.913115
	C33 H50 N O P3	59611.6	13850.9	15622.5	9071.89	20703.6	30793.7	36633.6	59074.2	112798	2.11	1.93	2.72	1.53	0.95	0.7	0.01	-0.92	0.993325	0.98494	0.975137	0.996828	0.999935	0.999423	0.999998	0.162248
	C35 H45 N O4	112227	11186	11221.7	10712.3	171646	167255	121968	99796.5	78994.6	3.33	3.32	3.39	-0.61	-0.58	-0.12	0.17	0.51	0.110067	0.096311	0.0905126	0.897488	0.937102	1	1	0.923643
	C24 H38 Cl N2 O3 P S	246586	189172	149901	149633	157211	169786	145750	235105	86037.4	0.38	0.72	0.72	0.65	0.54	0.76	0.07	1.52	0.58277	0.015863	0.0174268	0.0667922	0.0939117	0.0405646	1	6.76588e-07
	C30 H55 N3 S2	144094	26040	23183.5	23758.7	165443	192359	98905.1	157197	104933	2.47	2.64	2.6	-0.2	-0.42	0.54	-0.13	0.46	0.197424	0.124512	0.127756	1	0.999987	0.851482	1	0.96881
6′-Methoxycinchonan-9-ol	C20 H24 N2 O2	34274.6	6872.4	6174.21	6316.38	15197.5	41170.2	7465.04	24050.4	6554.86	2.32	2.47	2.44	1.17	-0.26	2.2	0.51	2.39	0.798832	0.50981	0.519382	0.966632	0.999996	0.999381	0.820461	0.329895
3-[(6-Oxodecanoyl)oxy]-4-(trimethylammonio)butanoate	C17 H31 N O5	146029	70475.4	57214.6	65090	115985	128177	173493	143147	120633	1.05	1.35	1.17	0.33	0.19	-0.25	0.03	0.28	0.881009	0.432429	0.697356	0.999916	0.999994	1	0.999996	1
	C23 H41 N O	7774.61	10456.6	31549.4	49217	9019.62	9388.3	7902.77	6032.24	8301.36	-0.43	-2.02	-2.66	-0.21	-0.27	-0.02	0.37	-0.09	0.972812	0.998757	1	0.994256	0.99997	0.971709	0.999996	0.968492
	C23 H52 N4 P2	40765.2	40074.1	26033.1	78627.2	16792.4	35135.4	21130.9	15908.1	14329.2	0.02	0.65	-0.95	1.28	0.21	0.95	1.36	1.51	0.986104	0.99101	0.999977	0.999552	1	0.928846	0.731214	0.447758
	C61 H95 N O12	198754	223811	194165	156154	150442	137392	156170	181063	234556	-0.17	0.03	0.35	0.4	0.53	0.35	0.13	-0.24	1	0.99985	0.998144	0.94865	0.875739	0.959355	0.999932	0.997125
		76593.6	72939.7	61106.1	62730.1	46326.6	51972.9	24024.5	58013.8	97943.4	0.07	0.33	0.29	0.73	0.56	1.67	0.4	-0.35	0.999993	0.998332	1	0.961529	0.968286	0.568091	0.990328	0.554744
Hecogenin	C27 H42 O4	52110.6	8965.1	8100.21	8827.64	89910.3	110795	75423.8	42085.1	30721.7	2.54	2.69	2.56	-0.79	-1.09	-0.53	0.31	0.76	0.945625	0.902713	0.901993	0.984033	0.997781	1	1	0.999908
	C26 H53 N O7 P2 S	254467	46278.2	17508.8	14030.1	415817	378234	258584	251710	160298	2.46	3.86	4.18	-0.71	-0.57	-0.02	0.02	0.67	0.0017483	0.000365548	0.00026452	0.311184	0.525089	0.999999	0.999959	0.481422
	C31 H52 N O8 P	80435.5	41359	36613.7	27977.8	51723.2	55427.1	76144.1	174085	219613	0.96	1.14	1.52	0.64	0.54	0.08	-1.11	-1.45	0.991367	0.985959	0.976179	0.996868	0.998765	0.999744	0.99968	0.181533
	C31 H54 N O8 P	126744	53548.3	40121.7	42807.2	60348.3	71020	71240.8	190859	267050	1.24	1.66	1.57	1.07	0.84	0.83	-0.59	-1.08	0.98792	0.979265	0.973718	0.992075	0.998254	0.998936	0.999398	0.0825705
N-dodecanoylsphingosine 1-phosphate	C30 H60 N O6 P	397449	50039.1	45637.7	45110.9	687946	639459	367561	420957	215569	2.99	3.12	3.14	-0.79	-0.69	0.11	-0.08	0.88	0.0961422	0.0671306	0.0696061	0.687044	0.771708	0.999977	1	0.958703
	C28 H64 N4 O10 P2	149262	172178	117065	101243	93017.2	100210	124359	104362	145500	-0.21	0.35	0.56	0.68	0.57	0.26	0.52	0.04	0.999971	0.953176	0.828211	0.739429	0.827096	0.932442	0.965646	0.999986
		527405	442771	507560	562424	504655	513965	527164	526671	602037	0.25	0.06	-0.09	0.06	0.04	0	0	-0.19	0.999387	0.519647	0.981324	1	1	1	1	0.999997
		51395.6	103228	119056	55384.4	191852	205083	86304.8	45236.4	176782	-1.01	-1.21	-0.11	-1.9	-2	-0.75	0.18	-1.78	0.997827	0.988444	1	0.192887	0.666594	0.997053	0.999999	0.0549563
		263614	215325	185941	163139	132124	152951	134881	242198	66339.1	0.29	0.5	0.69	1	0.79	0.97	0.12	1.99	0.83422	0.0747099	0.0184132	0.00039286	0.000633217	0.000156143	1	4.65336e-09
N-Palmitoyl-L-tyrosine	C25 H41 N O4	89184.9	12308.3	11443.9	11394.9	169743	168929	121829	108246	51021.6	2.86	2.96	2.97	-0.93	-0.92	-0.45	-0.28	0.81	0.465269	0.409969	0.406587	0.211007	0.331887	0.930587	1	0.986481
	C25 H52 N O6 P	763583	150253	50482.9	46932.2	1.04489e+06	977950	592072	663853	330303	2.35	3.92	4.02	-0.45	-0.36	0.37	0.2	1.21	0.174784	0.0852614	0.0755016	0.91387	0.865974	1	1	0.984085
	C35 H43 N4 P	49105.5	42001.5	37834.5	36418.7	65489.9	28623.8	66971.4	47935.2	70180.5	0.23	0.38	0.43	-0.42	0.78	-0.45	0.03	-0.52	1	0.999965	0.999994	0.98762	0.989154	0.987929	1	0.849989
	C38 H70 N O P3	256504	38353.1	28122.9	33188.1	217505	326344	370773	235144	131239	2.74	3.19	2.95	0.24	-0.35	-0.53	0.13	0.97	0.315254	0.260831	0.259609	1	0.999912	0.840649	0.999999	0.996788
[Similar to: 3-(3-methyl-1H-indol-1-yl)-N-{4-[3-(trifluoromethyl)-1H-pyrazol-1-yl]phenyl}propanamide; ΔMass: 257.3521 Da]	C34 H71 N O11	323183	294496	265362	265602	240446	235748	253922	282993	102636	0.13	0.28	0.28	0.43	0.46	0.35	0.19	1.65	0.924542	0.414299	0.216417	0.0292491	0.0177822	0.0368275	0.978173	8.78527e-11
	C30 H62 N O6 P	337800	45952.2	43451	44578.9	514593	567565	306357	316417	236015	2.88	2.96	2.92	-0.61	-0.75	0.14	0.09	0.52	0.170538	0.150012	0.154963	0.968349	0.984256	0.997603	1	0.936161
	C10 H19 N7 O2 S	40591.5	14895.4	11132.1	11092.5	50928.9	54788.9	46419.4	51521.9	51811.2	1.45	1.87	1.87	-0.33	-0.43	-0.19	-0.34	-0.35	0.896996	0.83764	0.958711	0.999635	0.999767	0.999997	1	0.999878
	C24 H45 N5 O8 S	191640	34678.1	16803.5	14233.4	317983	302725	193429	210507	101441	2.47	3.51	3.75	-0.73	-0.66	-0.01	-0.14	0.92	0.232941	0.132491	0.120413	0.707477	0.979895	1	0.999997	0.97879
Solanidine	C27 H43 N O	31765.8	9888.47	8460.81	9933.69	43100.3	34744.2	23177.7	30151.7	47897.5	1.68	1.91	1.68	-0.44	-0.13	0.45	0.08	-0.59	0.994046	0.984627	0.985123	0.998336	0.99414	1	1	1
	C26 H32 O P2 S	35274	11414.8	63806.6	42609.6	11668.5	10917.6	11303.9	9314.05	8425.1	1.63	-0.86	-0.27	1.6	1.69	1.64	1.92	2.07	0.526928	0.919054	0.644572	0.308256	0.303647	0.280359	0.448012	0.150664
	C28 H57 N4 O5 P	679325	132979	124647	32272.4	360187	391607	355570	281090	233846	2.35	2.45	4.4	0.92	0.79	0.93	1.27	1.54	0.677941	0.343786	0.17171	0.999989	0.999612	0.985299	0.792384	0.999982
	C25 H31 N3	14088.1	10942.9	10372.3	9759.72	16423	15610.3	14107.1	14337.8	15628.4	0.36	0.44	0.53	-0.22	-0.15	0	-0.03	-0.15	0.991463	0.985136	0.980415	1	0.999996	0.999602	1	0.999698
Testosterone cypionate	C27 H40 O3	68328.3	13849.3	9203.51	9889.01	119985	145323	92386.2	46902	57741	2.3	2.89	2.79	-0.81	-1.09	-0.44	0.54	0.24	0.452561	0.375746	0.390121	0.635262	0.144713	0.988129	0.999976	0.999999
	C20 H35 N O6	148344	115702	92994.5	84513.2	107500	106403	111804	126665	157211	0.36	0.67	0.81	0.46	0.48	0.41	0.23	-0.08	0.998864	0.993327	0.991857	0.999959	0.997645	0.998258	0.999828	0.958066
	C55 H103 N O3 P2 S2	261447	221202	200058	212390	186018	172022	161596	229499	36201.9	0.24	0.39	0.3	0.49	0.6	0.69	0.19	2.85	0.865197	0.596546	0.575232	0.015323	0.00671338	0.00114651	0.990533	1.5199e-12
	C65 H89 N O3	149596	169953	147862	178767	148909	137128	149393	164037	39032.2	-0.18	0.02	-0.26	0.01	0.13	0	-0.13	1.94	0.69388	1	0.999984	1	0.99955	0.999502	0.952843	4.71727e-07
Tephrowatsin B	C22 H24 O3	49794	8385.33	8011.27	7262.17	76001.5	91178.1	95391.2	58042.8	33823.4	2.57	2.64	2.78	-0.61	-0.87	-0.94	-0.22	0.56	0.723712	0.62064	0.604629	0.748298	0.723923	0.860538	1	0.993142
[Similar to: Nervonic acid; ΔMass: 657.3944 Da]		188108	175523	168618	175578	161674	142097	144388	184824	32019	0.1	0.16	0.1	0.22	0.4	0.38	0.03	2.55	0.999728	0.592823	0.867214	0.162061	0.00675909	0.0393008	0.996336	2.5453e-12
Bilirubin	C33 H36 N4 O6	223910	13623.5	7726.01	9628.76	82552.9	158317	81050.4	154943	57711.2	4.04	4.86	4.54	1.44	0.5	1.47	0.53	1.96	0.791638	0.409592	0.455524	0.999079	0.999998	0.841224	0.999938	0.989475
	C52 H107 O P3	180470	48253.9	37642.6	30492.5	112344	103657	83451.8	271197	115298	1.9	2.26	2.57	0.68	0.8	1.11	-0.59	0.65	0.999273	0.998554	0.998629	0.993969	0.943132	1	1	1
	C45 H59 N O4	211839	41684.2	25985.4	24689.3	76012.4	127747	94913.8	146617	36567.6	2.35	3.03	3.1	1.48	0.73	1.16	0.53	2.53	0.0254778	0.0011035	0.00103547	0.0551861	0.206657	0.051219	0.927553	0.000427648
	C28 H68 N9 O5 P	63179.6	36697.7	90102.5	60771.9	19840.2	48832.5	30533.4	19190.9	121623	0.78	-0.51	0.06	1.67	0.37	1.05	1.72	-0.94	0.907547	1	0.999345	0.642173	0.968062	0.999753	0.617244	0.999512
	C32 H70 N10 O4 S	278157	32340.9	33141.7	32132.5	391288	412959	310759	264803	166437	3.1	3.07	3.11	-0.49	-0.57	-0.16	0.07	0.74	0.0189626	0.0144726	0.0137599	0.912713	0.778752	0.993163	0.99999	0.627005
	C26 H45 N3 O6 S	129080	24740.1	10385.6	10384.1	150178	139754	88145.4	120329	62901.8	2.38	3.64	3.64	-0.22	-0.11	0.55	0.1	1.04	0.319263	0.149114	0.150646	0.991527	0.999761	0.999595	0.999997	0.96414
	C20 H39 N O4	181530	76351.4	61883.5	72746	225116	225042	168876	176091	142967	1.25	1.55	1.32	-0.31	-0.31	0.1	0.04	0.34	0.282034	0.226424	0.340761	0.783644	0.955792	0.999992	0.998685	0.904004
	C16 H39 N5 O2 S2	334691	167804	103766	104366	164803	155653	122679	314473	78833	1	1.69	1.68	1.02	1.1	1.45	0.09	2.09	0.00480673	1.43783e-05	1.11792e-05	0.00614248	0.00833482	0.000192204	1	7.99615e-08
	C61 H127 N3 O6 P2	217152	246330	204614	218539	194099	147553	166315	206977	51809.9	-0.18	0.09	-0.01	0.16	0.56	0.38	0.07	2.07	0.686784	0.997725	0.952064	0.994576	0.632918	0.987487	0.983396	1.22609e-06
Calcitriol	C27 H44 O3	126307	21077.6	9039.71	9234.24	219953	195748	105762	93060.8	74297.1	2.58	3.8	3.77	-0.8	-0.63	0.26	0.44	0.77	0.485528	0.387102	0.339841	0.613417	0.78364	1	0.999991	0.999045
	C32 H63 N O6	257496	40282.8	47126.4	18346.2	161436	189932	151704	154692	98487.9	2.68	2.45	3.81	0.67	0.44	0.76	0.74	1.39	0.309916	0.110553	0.0444879	0.999995	0.999995	0.956104	0.88442	0.937854
	C28 H59 P S	33615.4	19590.8	20546.8	19470.5	36725.7	57360.2	82088.5	23907.5	93131.4	0.78	0.71	0.79	-0.13	-0.77	-1.29	0.49	-1.47	1	1	1	0.999999	0.823971	0.993428	1	0.342851
	C25 H48 N6 O2	466698	40902.4	39175.6	22605	282106	253921	270817	499042	206487	3.51	3.57	4.37	0.73	0.88	0.79	-0.1	1.18	0.152372	0.0879222	0.0720057	0.938335	0.965741	0.99014	0.999991	0.977533
	C29 H61 N O4	54459.8	13587.9	14883.9	12959.3	73781.4	75456.6	51987.2	77771.4	13274.6	2	1.87	2.07	-0.44	-0.47	0.07	-0.51	2.04	0.725011	0.731544	0.718651	0.941129	0.897879	0.999997	1	0.934665
	C13 H20 N O5 P	192750	71027.9	43467.4	23319.1	106818	86150.2	98592.7	77018.6	152367	1.44	2.15	3.05	0.85	1.16	0.97	1.32	0.34	0.416863	0.167321	0.084936	0.956954	0.762408	0.548981	0.43092	1
(2R)-1-{[(2-Aminoethoxy)(hydroxy)phosphoryl]oxy}-3-hydroxy-2-propanyl (5Z,8Z,11Z,14Z,17Z)-5,8,11,14,17-icosapentaenoate	C25 H42 N O7 P	166950	28193.6	12320.4	10284.6	259640	230603	120553	153965	92588.8	2.57	3.76	4.02	-0.64	-0.47	0.47	0.12	0.85	0.136972	0.0552489	0.0505212	0.999339	0.998959	0.993606	1	0.935137
	C25 H34 N2	28422.5	31687.9	10025.8	10149.6	14911.5	22559.2	63166.9	15694.9	12713	-0.16	1.5	1.49	0.93	0.33	-1.15	0.86	1.16	0.534212	0.409851	0.30321	0.84214	0.999832	0.990011	0.48939	0.172772
	C25 H50 N9 O2 P3 S	156647	21942.7	10955.4	10253.5	262543	224225	138979	140576	86233.2	2.84	3.84	3.93	-0.75	-0.52	0.17	0.16	0.86	0.14407	0.0655012	0.0616259	0.477307	0.575741	1	0.999983	0.923954
	C14 H34 N9 P	201097	65141.4	30314.9	13022.6	179157	203560	198101	205187	121659	1.63	2.73	3.95	0.17	-0.02	0.02	-0.03	0.73	0.143479	0.0162806	0.00809321	1	0.999989	1	1	0.995777
[Similar to: N4-[3-(acetylamino)-2-oxo-2H-chromen-6-yl]-3-(2,6-dichlorophenyl)-5-methylisoxazole-4-carboxamide; ΔMass: 242.4897 Da]	C31 H72 N9 O7 P	292266	284673	256872	225136	228236	243307	232788	269698	102299	0.04	0.19	0.38	0.36	0.26	0.33	0.12	1.51	0.9877	0.820558	0.16256	0.262284	0.355021	0.185488	0.999779	4.2928e-09
	C18 H25 N8 O2 P	47853.8	12473.7	10604.7	10014.9	105973	99305.4	36753.8	29131.4	13962.9	1.94	2.17	2.26	-1.15	-1.05	0.38	0.72	1.78	0.362931	0.17296	0.167189	0.793974	0.995041	0.547124	0.792287	0.101404
[Similar to: 3-hydroxy-3,4-bis[(4-hydroxy-3-methoxyphenyl)methyl]oxolan-2-one; ΔMass: 146.1061 Da]	C24 H41 O10 P	9951.29	8579.82	8064.02	8262.3	10070	10076.5	9911.44	10233.5	18765	0.21	0.3	0.27	-0.02	-0.02	0.01	-0.04	-0.92	0.871276	0.832818	0.82066	0.999996	0.999942	0.998394	0.999508	0.00147906
	C32 H46 N O P3	52699	12568.9	14650.2	11703.3	23981.3	20732	97010.8	74696.9	116418	2.07	1.85	2.17	1.14	1.35	-0.88	-0.5	-1.14	0.995473	0.991507	0.990355	0.999428	0.999111	0.899863	0.998765	0.0439679
	C36 H57 N O8	270093	187659	176452	134561	151320	140991	146386	166993	173685	0.53	0.61	1.01	0.84	0.94	0.88	0.69	0.64	0.973289	0.791094	0.769204	0.733064	0.547317	0.595868	0.829684	1
	C17 H36 N5 O2 P	86058.6	33844.3	20818	16374.8	13140.1	8242.22	7992.28	16356.3	12963.6	1.35	2.05	2.39	2.71	3.38	3.43	2.4	2.73	0.876219	0.293136	0.136231	0.179462	0.686153	0.0512297	0.130091	0.0223773
elymoclavine	C16 H18 N2 O	55992.5	12205.5	6863.33	9874.75	24856.3	49231.5	15236.4	55584.7	16156.8	2.2	3.03	2.5	1.17	0.19	1.88	0.01	1.79	0.994508	0.214084	0.39521	0.806364	0.994926	0.901672	0.999831	0.24289
Metyrapone	C14 H14 N2 O	54350.9	39092.3	28462.9	22731.5	34679.5	32433.5	33238.7	44542	14936.4	0.48	0.93	1.26	0.65	0.74	0.71	0.29	1.86	0.140147	0.000760034	4.56147e-05	0.0129226	0.0112878	0.00314675	0.393883	1.38237e-08
	C15 H30 N2 O2	49908.8	16681.3	13813.8	13076.8	70835.7	71613.2	63094.3	47521.5	29171	1.58	1.85	1.93	-0.51	-0.52	-0.34	0.07	0.77	0.0219038	0.0217868	0.00885535	0.429454	0.350109	0.989	0.999996	0.242661
	C27 H37 N3 O	10913.6	25677.7	28431.2	61511.1	16583.7	18676.8	9646.7	5890.25	11062.2	-1.23	-1.38	-2.49	-0.6	-0.78	0.18	0.89	-0.02	0.909534	0.501577	0.000157945	0.999967	1	1	0.986792	0.999785
	C12 H27 N5 O2 P2	70138.8	65197.8	51288.7	52163.6	51177.5	49867.4	40568.4	66574.6	24564.3	0.11	0.45	0.43	0.45	0.49	0.79	0.08	1.51	0.998042	0.435913	0.561603	0.680054	0.325834	0.174444	1	0.000763895
	C22 H22 N2 S	93021.6	65037.2	50238.1	51419.5	53126.4	51509.8	45163.9	91947	30317.7	0.52	0.89	0.86	0.81	0.85	1.04	0.02	1.62	0.312338	0.0149411	0.00347428	0.030038	0.0237913	0.00896846	0.999911	8.94441e-06
		66825.1	67962.2	52367.2	50408.2	47066.4	42108	37915.3	65773.1	13672.7	-0.02	0.35	0.41	0.51	0.67	0.82	0.02	2.29	0.995897	0.22176	0.186231	0.0139902	0.0350864	0.00029186	0.983136	1.28647e-10
	C25 H52 N O6 P	47749.8	14891.9	8929.78	10792.5	112977	95624.7	49715.6	39888.2	37274	1.68	2.42	2.15	-1.24	-1	-0.06	0.26	0.36	0.130624	0.0481585	0.0647124	0.00549535	0.0621407	0.998136	0.999989	0.990733
		138755	15483.4	11995.6	11014.3	219913	207549	142027	143508	89011.7	3.16	3.53	3.66	-0.66	-0.58	-0.03	-0.05	0.64	0.0009427	0.000461007	0.000422796	0.271374	0.386249	0.999989	0.988313	0.469704
		10768.1	9133.18	9049.27	9057.55	39315.3	44132.3	17667.6	10048.3	49226	0.24	0.25	0.25	-1.87	-2.04	-0.71	0.1	-2.19	1	0.999999	0.999998	0.700572	0.57123	0.998203	0.997566	0.000343023
trans-Azobenzene	C12 H10 N2	74786.6	44249.4	47949	32594.5	27927.8	68398.5	27900	85169.2	35991.2	0.76	0.64	1.2	1.42	0.13	1.42	-0.19	1.06	0.999959	0.979315	0.990694	0.904406	0.999982	1	0.999999	0.989606
	C25 H49 N5 O6	98279.6	87353.6	63221.1	53967	68131.5	61442.7	52071.4	83531.8	27263.2	0.17	0.64	0.86	0.53	0.68	0.92	0.23	1.85	0.986464	0.133143	0.00360325	0.18747	0.00972791	0.00188039	0.999524	2.64201e-08
	C34 H63 N P2	98037.9	85644.5	70604.7	68800.5	53320	45735	60986.9	84834.1	25733.1	0.19	0.47	0.51	0.88	1.1	0.68	0.21	1.93	0.999357	0.594622	0.17276	0.00478612	0.00598746	0.00320925	1	3.4282e-08
	C19 H40 N5 O3 P	47771.3	7184.11	7124.71	7303.71	80178.3	86864	50480.5	48185.3	33735.3	2.73	2.75	2.71	-0.75	-0.86	-0.08	-0.01	0.5	0.00851268	0.00642122	0.0064391	0.0966879	0.195789	0.996466	0.992581	0.769974
	C16 H34 N2 O8 P2	12081.6	10803.4	8492.77	11995.5	12570.8	10614	12354.3	9517.4	28735.7	0.16	0.51	0.01	-0.06	0.19	-0.03	0.34	-1.25	1	0.998149	0.999999	0.999292	0.999994	0.998963	0.99999	0.000112351
	C17 H37 N4 O6 P	38829.4	6791.98	7919.15	6635.59	75771.3	78436.1	55477.1	35969.1	11250.4	2.52	2.29	2.55	-0.96	-1.01	-0.51	0.11	1.79	0.927054	0.898421	0.886491	0.949757	0.995133	1	0.999994	0.999663
	C20 H44 N9 P	101570	89116.8	82367.4	74737.2	83578.2	72428.1	75496	91447.6	36247.8	0.19	0.3	0.44	0.28	0.49	0.43	0.15	1.49	0.54428	0.231899	0.105994	0.120638	0.035077	0.037115	0.994412	1.62321e-07
	C21 H35 N O4	99591.1	66094.2	19403.9	10247.4	164042	180336	133906	109235	256419	0.59	2.36	3.28	-0.72	-0.86	-0.43	-0.13	-1.36	0.995911	0.259704	0.48484	0.774454	0.779221	0.999725	1	4.39005e-05
		70898.9	69548.6	56366.4	64174.4	45101.7	42205.7	39765.7	56576.2	20287.8	0.03	0.33	0.14	0.65	0.75	0.83	0.33	1.81	1	0.766625	0.938583	0.00177585	0.00414986	0.000243131	0.965701	4.31753e-09
	C28 H41 P3	19139.6	29047.2	55768.5	86936.7	12937.7	14349.2	20875.8	12001.5	13602.7	-0.6	-1.54	-2.18	0.56	0.42	-0.13	0.67	0.49	0.999584	0.999997	0.967077	0.955899	0.995924	0.981265	1	0.855737
	C30 H56 N O2 P	89282.8	87630.1	81107.1	80662.3	83941.6	75951.3	73547.3	85649.7	21290.3	0.03	0.14	0.15	0.09	0.23	0.28	0.06	2.07	0.999378	0.999708	0.990912	0.999915	0.936069	0.994069	0.999998	1.02842e-06
	C30 H63 N O10	185489	164357	166758	153059	136915	137391	144410	164864	84643.8	0.17	0.15	0.28	0.44	0.43	0.36	0.17	1.13	0.999924	0.870668	0.755624	0.276454	0.138358	0.111071	0.982525	4.43928e-07
	C23 H54 N9 O P	112337	96160	77137.2	79646.5	56198.3	58609.3	61985.4	115061	23305.7	0.22	0.54	0.5	1	0.94	0.86	-0.03	2.27	0.980916	0.198855	0.0264677	0.000338623	0.000298399	0.000426234	0.997352	1.96201e-09
	C18 H41 O3 P3 S	20606	10486.2	9858.29	11194.1	46044	40389.4	36359.5	19269	89932	0.97	1.06	0.88	-1.16	-0.97	-0.82	0.1	-2.13	0.999796	0.999513	0.999643	0.950474	0.86199	0.997384	1	3.44572e-05
	C18 H30 N2 O17	70042	9948.19	9264.79	9349.96	104600	91949.5	39500.5	53922.6	39619.1	2.82	2.92	2.91	-0.58	-0.39	0.83	0.38	0.82	0.0483953	0.0324285	0.0357959	0.623603	0.824698	0.905961	0.998811	0.790931
	C40 H67 N3 S	89728	17419.5	17385.9	17623.5	191796	188740	108077	71896.2	52066.3	2.36	2.37	2.35	-1.1	-1.07	-0.27	0.32	0.79	0.168963	0.169681	0.175746	0.135287	0.152074	1	1	0.98877
	C24 H48 N3 O P S	63880.2	46794	32992.6	29348.8	30269.6	39739.8	27814.7	59997.9	28680.4	0.45	0.95	1.12	1.08	0.68	1.2	0.09	1.16	0.971299	0.166102	0.0236156	0.0702833	0.268012	0.0101213	1	0.0121252
	C18 H48 N9 O5 P	79971	65523.1	52858.5	44446.7	51472	51738.8	42066.3	75295.6	31256.3	0.29	0.6	0.85	0.64	0.63	0.93	0.09	1.36	0.976792	0.0814439	0.0055116	0.032955	0.0968671	0.00590045	0.999995	1.11551e-05
	C21 H50 N9 P	114909	76628.1	70360.1	53819.9	42534.4	53842	51186.8	102631	23497.5	0.58	0.71	1.09	1.43	1.09	1.17	0.16	2.29	0.663224	0.0376041	0.00104587	2.66924e-05	0.00058361	0.000135081	1	7.98816e-08
	C24 H45 O P S	44923.7	23777.7	10276.8	9587.62	82183.1	55548.9	41919.3	31853.1	12312.2	0.92	2.13	2.23	-0.87	-0.31	0.1	0.5	1.87	0.091462	0.00369411	0.00304953	0.272406	0.998698	0.996921	0.391601	0.0115577
	C25 H58 N9 O4 P	55124.4	51315	42112.1	51034.2	38887.7	29869.3	37271.8	47985.2	13702.9	0.1	0.39	0.11	0.5	0.88	0.56	0.2	2.01	0.99534	0.387807	0.905437	0.0611241	0.029961	0.0421421	0.999999	1.38991e-06
		26609	7447.13	6556.64	6618.76	32845.4	40285.7	12365.2	17403.5	13130	1.84	2.02	2.01	-0.3	-0.6	1.11	0.61	1.02	0.125975	0.0991739	0.102485	0.999982	0.981124	0.66678	0.998396	0.382596
3-Methyl-3-(4-methyl-3-penten-1-yl)-3,11-dihydropyrano[3,2-a]carbazole-5-carbaldehyde	C23 H23 N O2	61768.4	39280.6	21514.6	13742	19080.6	26725.2	27505.6	56967.2	10924.7	0.65	1.52	2.17	1.69	1.21	1.17	0.12	2.5	0.0235051	1.3857e-05	2.15272e-07	5.53705e-05	0.00142602	0.00150709	1	2.01114e-08
	C21 H33 O8 P	67944.8	53231	42295.5	45550.9	32363.6	36710.8	28561.5	43768.7	10740.9	0.35	0.68	0.58	1.07	0.89	1.25	0.63	2.66	0.918555	0.861361	0.972054	0.301357	0.375583	0.212839	0.678603	7.12503e-05
		52289.2	11576.4	9532.07	9926.91	35947.3	40850.1	26656	56628.2	25463.5	2.18	2.46	2.4	0.54	0.36	0.97	-0.12	1.04	0.0284599	0.0104374	0.0106643	0.910828	0.987369	0.414253	0.816928	0.174598
	C13 H26 N6 O S	29957.3	7153.83	6170.07	6581.39	46431.6	46953.3	29115.4	27816.5	14026.4	2.07	2.28	2.19	-0.63	-0.65	0.04	0.11	1.09	0.176676	0.0861104	0.110187	0.394335	0.0961683	0.999996	0.99725	0.838903
	C22 H22 N2 O	42635.7	24224.8	9853.72	11965.2	17466.7	28686.3	12788.8	39743.2	10209.3	0.82	2.11	1.83	1.29	0.57	1.74	0.1	2.06	0.291912	8.34894e-05	0.000165485	0.00566392	0.0255124	0.000512285	0.998789	3.37502e-06
[Similar to: NP-016596; ΔMass: -162.0622 Da]	C15 H16 N2	74394.2	65744.5	60379.5	61245.4	55282.3	48548.6	48123.9	69130.8	30076.8	0.18	0.3	0.28	0.43	0.62	0.63	0.11	1.31	0.992888	0.556703	0.876725	0.399043	0.252367	0.145006	0.999999	0.000238739
		14860.4	17841.4	12353.8	10663.5	26479	23968.4	13461.2	14471.5	32782.3	-0.26	0.27	0.48	-0.83	-0.69	0.14	0.04	-1.14	1	0.996127	0.995623	0.997346	0.997819	0.999986	0.99993	0.0169168
	C22 H47 O12 P3	11512.4	15757.8	18392.4	18062.2	9640.56	11440	14449.6	9825.28	11028.8	-0.45	-0.68	-0.65	0.26	0.01	-0.33	0.23	0.06	0.889374	0.523571	0.553337	1	0.999876	0.341717	0.999953	0.999926
		30280.5	43795.3	79315.8	44465.8	24075.1	32701.9	22666.1	12366.3	44470.4	-0.53	-1.39	-0.55	0.33	-0.11	0.42	1.29	-0.55	0.955429	0.996461	0.988415	0.938531	0.939478	1	0.818524	0.973379
	C24 H35 N3 O	69126	33137.1	11870.9	18950	28260.2	36193.5	27578	68287.4	7908.47	1.06	2.54	1.87	1.29	0.93	1.33	0.02	3.13	0.175618	0.000172755	0.000504347	0.0290047	0.0853653	0.0118471	0.996547	3.1719e-06
	C31 H39 N10 O2 P	33153.6	7342.18	7260.29	7396.72	29290.1	38461.5	16616.8	38110.4	69378.9	2.17	2.19	2.16	0.18	-0.21	1	-0.2	-1.07	0.794489	0.773246	0.772127	0.999996	1	0.998428	0.999829	0.560173
	C30 H56 N O7 P	150965	40770	26568.9	26031.2	228072	228258	135475	144339	68777.6	1.89	2.51	2.54	-0.6	-0.6	0.16	0.06	1.13	0.0102768	0.00299094	0.00297344	0.097891	0.125777	0.99918	1	0.303349
	C26 H55 N O10	158229	164246	99115.9	90611	157180	121479	135921	98213.7	471352	-0.05	0.67	0.8	0.01	0.38	0.22	0.69	-1.57	1	1	0.99961	1	1	1	0.998361	5.35926e-05
	C20 H52 N9 O5 P	82262.4	69298.2	64110.8	60607.6	49761.3	58745.1	52831.9	79091.4	39105.8	0.25	0.36	0.44	0.73	0.49	0.64	0.06	1.07	0.99888	0.534696	0.577799	0.0886696	0.474435	0.291315	0.999968	0.0170391
[Similar to: 4-(6-{[(4R,5S,6R)-4-methoxy-6-methyl-5-{[(2S,3R,4S,5S,6R)-3,4,5-trihydroxy-6-({[(2R,3R,4S,5S,6R)-3,4,5-trihydroxy-6-(hydroxymethyl)oxan-2-yl]oxy}methyl)oxan-2-yl]oxy}oxan-2-yl]oxy}-9,13-dimethyl-17-oxotetracyclo[11.3.1.0Âa,Âaâ°.0â´,âa]heptadecan-14-yl)-2,5-dihydrofuran-2-one; ΔMass: -194.0823 Da]	C24 H51 N6 O12 P	6128.48	4455.49	3775.22	4394.55	11963.5	11211.3	5874.1	5141.58	17987.1	0.46	0.7	0.48	-0.97	-0.87	0.06	0.25	-1.55	0.999968	0.996233	0.999349	0.816029	0.960588	1	0.999914	0.00278373
	C29 H61 N O11	61745.4	65927.3	48006.9	45445.5	39567.5	35729.6	32039.9	52811.8	36734.8	-0.09	0.36	0.44	0.64	0.79	0.95	0.23	0.75	0.837439	0.996283	0.998564	0.948176	0.911442	0.935939	0.999997	0.998505
	C24 H29 N O8	7607.99	7508.58	7046.67	8257.62	8101.45	7820.02	7523.76	6984.61	11872	0.02	0.11	-0.12	-0.09	-0.04	0.02	0.12	-0.64	0.995368	0.986624	0.999999	1	1	1	0.999729	0.0195278
		11646.2	10464.2	9973.59	10182.3	12513.5	11904.6	11326.8	9807.77	44733.9	0.15	0.22	0.19	-0.1	-0.03	0.04	0.25	-1.94	0.999894	0.999532	0.999255	0.996673	0.999893	1	1	1
	C28 H43 O2 P3	8855.51	8650.31	9016.93	8082.67	8777.33	9570.74	8378.54	8158.85	11719.1	0.03	-0.03	0.13	0.01	-0.11	0.08	0.12	-0.4	0.997099	0.9988	0.999607	0.999973	0.999995	0.994757	1	0.657505
	C13 H30 N4 O4 P2	66262.6	18497.4	10432.2	7404.66	29524.5	33408.6	22405.1	35884.3	25149.4	1.84	2.67	3.16	1.17	0.99	1.56	0.88	1.4	0.417238	0.0326969	0.0447218	0.733972	0.716276	0.462448	0.509588	0.404167
	C19 H27 N O2 S	51797.2	6898.35	5690.62	6301.82	7627.44	7467.32	25675.9	13484.1	6960.45	2.91	3.19	3.04	2.76	2.79	1.01	1.94	2.9	0.00767193	0.00174042	0.00187915	0.0244178	0.0923947	0.205695	0.19141	0.000294457
(3β,5ξ,9ξ)-3-Hydroxyursa-12,20(30)-dien-28-oic acid	C30 H46 O3	71114.9	14255.3	13800.3	13847.6	79221.9	68141.6	51489.7	75093.1	41365	2.32	2.37	2.36	-0.16	0.06	0.47	-0.08	0.78	0.72148	0.404457	0.446784	0.789706	0.802763	1	1	0.999749
	C23 H48 N5 O7 P	28229.3	5988	5602.43	5675.24	82295.9	61552.8	43372.8	26546.6	17396	2.24	2.33	2.31	-1.54	-1.12	-0.62	0.09	0.7	0.365746	0.310312	0.30694	0.00206535	0.00588964	0.863756	1	0.999995
	C51 H93 N O3 S3	102958	91679.5	92146.5	95071.1	61635.9	70863.1	65365.2	97101.5	19339.7	0.17	0.16	0.11	0.74	0.54	0.66	0.08	2.41	0.985137	0.996075	0.999992	0.187741	0.151984	0.0872546	0.999958	0.00061622
	C46 H69 N O P2	43699.6	45829.4	48487.9	36874.1	36796.9	36942.5	43867	40303.2	49992.2	-0.07	-0.15	0.25	0.25	0.24	-0.01	0.12	-0.19	0.999999	0.999313	0.999952	0.956544	0.938002	0.984964	0.997629	0.999993
7-OXOCHOLESTEROL	C27 H44 O2	90370	16232.2	14723	17250.6	84902	75283.7	38465.1	119841	45902.7	2.48	2.62	2.39	0.09	0.26	1.23	-0.41	0.98	0.0899898	0.0654018	0.0775005	0.999902	1	0.917874	1	0.979551
	C22 H45 N5 O2 P2	47803	27578	26782.4	33139.2	32061.4	34022.5	45567	42497.8	72009	0.79	0.84	0.53	0.58	0.49	0.07	0.17	-0.59	0.999145	0.990101	0.997699	0.999999	0.999998	1	1	0.343469
	C21 H45 N10 O2 P	46446.4	34349.1	21288.7	27406.2	86508.4	75356	53601.6	28961.8	48025.6	0.44	1.13	0.76	-0.9	-0.7	-0.21	0.68	-0.05	0.993758	0.732151	0.817889	0.0108232	0.0995824	0.98445	0.93441	0.997147
(9Z)-9-Octadecenamide	C18 H35 N O	223525	147722	141320	134628	229845	265997	212633	189559	673087	0.6	0.66	0.73	-0.04	-0.25	0.07	0.24	-1.59	0.997348	0.995817	0.995524	0.999985	1	0.999993	0.999819	0.0383357
	C33 H49 N7 O2	237770	37460.2	35145.2	36191.8	431885	399105	250303	276370	144932	2.67	2.76	2.72	-0.86	-0.75	-0.07	-0.22	0.71	0.0737365	0.0589808	0.0603318	0.343374	0.301632	1	1	0.922666
[Similar to: 4-({3-[3,5-bis(trifluoromethyl)phenyl]-1,2,4-oxadiazol-5-yl}methyl)-4-methylpiperidine hydrochloride; ΔMass: 175.2086 Da]		44174.7	8108.86	4701.83	5447.69	100217	91248	68722.5	52921.6	26783.7	2.45	3.23	3.02	-1.18	-1.05	-0.64	-0.26	0.72	0.000349016	7.8813e-05	0.000106305	2.61477e-05	0.000103782	0.452079	1	0.288705
	C6 H13 N9 P2	102243	36046.2	22271.1	12058	48283.3	46119.9	51375.9	40906.6	60930.6	1.5	2.2	3.08	1.08	1.15	0.99	1.32	0.75	0.236378	0.0788622	0.0270988	0.937786	0.580929	0.419861	0.281886	0.990904
	C18 H43 N9 O2 P2	200717	44550.7	12492	10777.3	250742	244524	178045	170396	105182	2.17	4.01	4.22	-0.32	-0.28	0.17	0.24	0.93	0.0190515	0.00376756	0.00278205	0.999946	0.999262	0.999683	1	0.780226
	C34 H66 N O7 P	263543	36062.9	32798.1	36360	315841	342884	196359	302784	153295	2.87	3.01	2.86	-0.26	-0.38	0.42	-0.2	0.78	0.0453989	0.0309501	0.0344775	0.999334	0.931462	0.992885	0.99999	0.980014
Tocopherol nicotinate	C35 H53 N O3	308014	45234.6	41002.8	42377.8	461730	457452	238523	255021	160504	2.77	2.91	2.86	-0.58	-0.57	0.37	0.27	0.94	0.0709026	0.0618294	0.0644892	0.781014	0.882162	0.998996	1	0.854089
	C39 H75 N O7 P2	47947.3	59049.1	27288.7	35248.8	42847.3	21853.4	23068.9	18283.2	73201.8	-0.3	0.81	0.44	0.16	1.13	1.06	1.39	-0.61	1	0.999944	1	1	0.999981	0.926772	0.940118	0.999997
	C23 H45 N3 O3	103436	30282.1	23948.7	23765.7	225483	205316	118415	83887.9	59105.1	1.77	2.11	2.12	-1.12	-0.99	-0.2	0.3	0.81	0.136395	0.105803	0.106633	0.00655955	0.0482491	0.999966	1	0.938269
	C30 H64 N2 O P2 S	109712	31461.5	15789.9	16978.8	36977.1	96234.1	69627.4	28281.9	68856.3	1.8	2.8	2.69	1.57	0.19	0.66	1.96	0.67	0.999716	0.998098	0.998592	1	1	0.999999	0.999833	0.985745
	C21 H27 N3 O S	132897	96975.4	69997.5	56861.3	92937.3	87792.7	80836.1	132906	71206.5	0.45	0.92	1.22	0.52	0.6	0.72	0	0.9	0.933968	0.0479821	0.00826985	0.417746	0.354557	0.269067	0.999969	0.019931
		71567.5	25921.5	28043.7	27387.1	52246.2	61436.7	29930.5	103569	50305	1.47	1.35	1.39	0.45	0.22	1.26	-0.53	0.51	0.999674	0.999716	0.999728	0.996183	0.902443	1	1	0.999996
	C21 H42 Cl N O6	128164	19985.3	7592.45	8047.76	167451	157142	114493	122133	68722.9	2.68	4.08	3.99	-0.39	-0.29	0.16	0.07	0.9	0.184356	0.111122	0.108613	0.999563	0.99929	1	1	0.999644
		280684	276895	202662	243480	195211	182119	202524	195478	270642	0.02	0.47	0.21	0.52	0.62	0.47	0.52	0.05	1	0.979392	0.983592	0.975498	0.89359	0.958923	0.963037	0.997541
4β-methylzymosterol-4-carbaldehyde	C29 H46 O2	95360.2	20696.7	15688.7	16053	72443.8	82332.2	15196.4	106137	72260.2	2.2	2.6	2.57	0.4	0.21	2.65	-0.15	0.4	0.041038	0.0214261	0.0212392	0.990693	0.999693	0.0201087	0.99987	0.959722
	C22 H46 N2 O4	44655.6	41278.9	13814.4	20554.4	34874.8	53726.7	32493.7	21900.3	94379.1	0.11	1.69	1.12	0.36	-0.27	0.46	1.03	-1.08	1	0.998003	1	1	0.999973	1	1	0.118749
	C22 H48 N O P S	140100	56635.1	39304.8	26962.7	278783	285656	166679	124032	107665	1.31	1.83	2.38	-0.99	-1.03	-0.25	0.18	0.38	0.215094	0.0437997	0.0152849	0.00412422	0.00302311	0.99255	1	0.990216
	C21 H42 N2 O S2	23921.1	29773.3	77121.4	159080	15284.4	20665.3	38630.1	14026.5	18148.8	-0.32	-1.69	-2.73	0.65	0.21	-0.69	0.77	0.4	0.991561	0.984709	0.0496364	0.999306	0.999998	1	1	0.984607
	C21 H40 N6 O2	89364.6	16158.9	16229.1	16409.4	130799	134340	90394.7	106963	55892.3	2.47	2.46	2.45	-0.55	-0.59	-0.02	-0.26	0.68	0.739166	0.683714	0.682598	0.85745	0.905317	1	0.999999	0.9954
	C18 H44 N8 O5 S	56600.1	11677.9	7984.21	8040.05	102962	99798.3	57758.7	30809.1	54359.6	2.28	2.83	2.82	-0.86	-0.82	-0.03	0.88	0.06	0.026452	0.0129546	0.014558	0.0209726	0.0422135	0.997618	0.72761	0.999776
		52231.2	11269.7	9074.85	9026.85	122910	107318	101076	34060	40004.5	2.21	2.52	2.53	-1.23	-1.04	-0.95	0.62	0.38	0.711285	0.661924	0.670683	0.030717	0.37489	0.581515	1	1
	C26 H53 N4 O4 P	150139	67885.8	24306.7	19253.7	111104	112149	71922.8	101315	71313.4	1.15	2.63	2.96	0.43	0.42	1.06	0.57	1.07	0.040836	0.00260716	0.0014608	0.913705	0.843467	0.378076	0.628415	0.503606
	C22 H41 N3 O6 S	63046	10539.1	9352.98	9941.33	104525	84601.9	28691.8	77004.9	38662.9	2.58	2.75	2.66	-0.73	-0.42	1.14	-0.29	0.71	0.581738	0.454471	0.441716	0.999974	1	0.956916	0.999997	0.997273
	C35 H43 N2 P	91196.8	71428.4	45527.1	57940	37529.1	30810.5	39140.5	65523.2	273020	0.35	1	0.65	1.28	1.57	1.22	0.48	-1.58	0.999735	0.993474	0.998643	0.988302	0.980509	0.974825	0.999754	0.00717375
	C27 H55 P S	226441	203215	203182	180275	215634	202488	210066	227952	114916	0.16	0.16	0.33	0.07	0.16	0.11	-0.01	0.98	0.999698	0.834832	0.533867	0.984529	0.787367	0.941184	1	0.000151718
	C37 H45 N O	181006	119593	63184.4	71679.5	165635	180091	126115	150702	171771	0.6	1.52	1.34	0.13	0.01	0.52	0.26	0.08	0.351238	0.00418933	0.0042293	0.999935	0.999999	0.992382	0.999544	0.999991
	C27 H41 N3 O6	147901	14861.4	9699.31	9751.59	187146	164986	95077.8	135225	48601.1	3.31	3.93	3.92	-0.34	-0.16	0.64	0.13	1.61	0.0603418	0.0306073	0.0305739	0.976474	0.997268	0.997615	1	0.734803
(25R)-3-Oxocholest-4-en-26-al	C27 H42 O2	93299	13157.3	13095.1	12761.7	89027.9	103463	66860.3	68991.9	34585.9	2.83	2.83	2.87	0.07	-0.15	0.48	0.44	1.43	0.00516634	0.00456059	0.00471451	1	0.999993	0.854796	0.98155	0.158559
		128569	114532	96214.3	91447.7	65554.8	79237.1	70908.2	127853	28888.4	0.17	0.42	0.49	0.97	0.7	0.86	0.01	2.15	0.993965	0.270387	0.122042	0.000412845	0.00242374	0.000347442	1	8.39637e-10
	C22 H21 O2 P	66089.8	21811.3	9611.76	8122	12140.8	34119.1	11014.4	48708.2	7089.2	1.6	2.78	3.02	2.44	0.95	2.59	0.44	3.22	0.326682	0.00579697	0.00988246	0.190833	0.400667	0.152682	0.980695	0.00087294
	C21 H39 N3 O4	55836.8	10973.8	6260.49	7100.74	111667	117943	73397.3	49145.1	152402	2.35	3.16	2.98	-1	-1.08	-0.39	0.18	-1.45	0.981931	0.970265	0.973391	0.969216	0.978965	0.999953	1	0.00316394
		77625.2	51668.3	65458.3	48886.7	41000.3	35859.6	37240.8	45692.9	49826.4	0.59	0.25	0.67	0.92	1.11	1.06	0.76	0.64	0.994379	0.99972	0.91539	0.761492	0.829066	0.894873	0.876575	1
	C22 H46 N O2 P S2	90822.9	17961	8088.08	7459.72	120017	107452	64813.8	81931.6	55660.8	2.34	3.49	3.61	-0.4	-0.24	0.49	0.15	0.71	0.0966008	0.0228353	0.0172722	0.99701	0.998235	0.97986	1	0.992099
	C26 H45 N3 O S2	112106	11903.2	11766.3	11336.5	180164	142985	93898.1	107397	54804.7	3.24	3.25	3.31	-0.68	-0.35	0.26	0.06	1.03	0.0420465	0.0263944	0.0257259	0.848385	0.874777	0.99989	0.999993	0.883416
		58330.3	9308.75	7769.55	7857	134681	125355	83461.7	59306.7	40022.3	2.65	2.91	2.89	-1.21	-1.1	-0.52	-0.02	0.54	0.0341033	0.0172207	0.0169227	0.00668281	0.0338539	0.999553	0.999945	0.653281
	C65 H97 N O4 P2	97722.1	90582	124901	78509.1	87835.8	82335.6	96912.9	89823.7	108503	0.11	-0.35	0.32	0.15	0.25	0.01	0.12	-0.15	0.999961	1	1	0.999717	0.997599	0.999985	1	0.964762
	C18 H36 Cl N O2	31220.2	8871.17	8139.01	7679.16	92605.7	84344.2	56986.9	28461.7	20721.3	1.82	1.94	2.02	-1.57	-1.43	-0.87	0.13	0.59	0.600556	0.53021	0.536492	0.068166	0.16644	0.886601	0.999997	0.99926
	C19 H44 N5 O4 P	107509	14800.8	13217.2	16179.9	148803	169294	116080	93528.8	60823	2.86	3.02	2.73	-0.47	-0.66	-0.11	0.2	0.82	0.356789	0.309681	0.336059	0.653048	0.653267	0.989857	0.999901	0.999756
	C15 H39 N7 O4 S	103957	73462.4	60172.3	60616.4	75204.2	76940.3	93759.2	83668.6	90689.9	0.5	0.79	0.78	0.47	0.43	0.15	0.31	0.2	0.813689	0.600629	0.998603	0.955054	0.914831	0.953455	0.89142	1
lysophosphatidylcholine 14:1(9Z)/0:0	C22 H44 N O7 P	168929	18204.8	10490.4	11006.5	202229	230295	137190	160297	110831	3.21	4.01	3.94	-0.26	-0.45	0.3	0.08	0.61	0.00482962	0.00245913	0.00245415	0.852519	0.804117	0.998708	0.999997	0.975348
		74456.9	16260.9	10484	11167.8	160197	154680	41589.2	49575	55541.6	2.19	2.83	2.74	-1.11	-1.05	0.84	0.59	0.42	0.53288	0.143269	0.149257	0.00840727	0.105383	0.953252	1	0.984976
	C20 H42 N5 O5 P	42097.9	10303.7	7274.61	7505.61	65388	62445	46290.1	35335.8	39159	2.03	2.53	2.49	-0.64	-0.57	-0.14	0.25	0.1	0.594456	0.467768	0.473274	0.619968	0.708769	0.993951	1	1
		86019.4	15929.3	7988.93	9373.63	147668	137441	87525	50648.9	44064.5	2.43	3.43	3.2	-0.78	-0.68	-0.03	0.76	0.97	0.134633	0.0402368	0.0459331	0.114548	0.533783	0.999774	0.997402	0.828781
	C24 H43 N O8	11579.6	116701	115709	115673	23356.9	20039.4	19650.7	14329.2	9022.38	-3.33	-3.32	-3.32	-1.01	-0.79	-0.76	-0.31	0.36	6.392e-12	1.11533e-12	9.80438e-13	0.998951	0.92306	0.984697	1	1
5-Heneicosylresorcinol	C27 H48 O2	66074.2	13813.4	13351	14421.7	96135.1	99722	42967	62428.1	27579.4	2.26	2.31	2.2	-0.54	-0.59	0.62	0.08	1.26	0.659585	0.65608	0.664225	0.631644	0.758333	1	1	0.997429
	C19 H5 N7 O	40773.2	73349.5	64538.6	65749.9	91750.6	56893	81431.9	52023	92846.9	-0.85	-0.66	-0.69	-1.17	-0.48	-1	-0.35	-1.19	0.633144	0.926539	0.873067	0.519485	0.945284	0.526349	0.980058	0.0434802
	C22 H47 N O4 S	14337.1	15841.4	24778.4	67207.5	7290.74	15842.9	11885.8	5531.73	8940.33	-0.14	-0.79	-2.23	0.98	-0.14	0.27	1.37	0.68	1	0.962984	0.376174	0.999999	1	1	0.966475	0.999999
	C21 H27 N3 S	182652	112449	93307.8	92077.9	75751.3	92620.7	87879.6	159739	47251.7	0.7	0.97	0.99	1.27	0.98	1.06	0.19	1.95	0.0429366	0.00168815	0.000905045	0.00262754	0.00302017	0.000417577	0.997827	3.17833e-07
	C19 H44 N5 O4 P	65923.1	13123	6497.46	6808.65	111706	107556	82282.9	62675.5	40225	2.33	3.34	3.28	-0.76	-0.71	-0.32	0.07	0.71	0.0577323	0.0201363	0.020219	0.442743	0.440831	0.999997	0.999999	0.891996
	C20 H47 N4 O3 P	68649.9	17923.3	18555.9	16942.5	77216.2	99713.5	69208.4	79964	41709.5	1.94	1.89	2.02	-0.17	-0.54	-0.01	-0.22	0.72	0.409372	0.380864	0.370465	1	0.975446	0.999983	0.998956	0.973532
	C14 H37 N7 O3 S	167739	45301.7	20685	19152.3	389980	329428	230684	151156	117691	1.89	3.02	3.13	-1.22	-0.97	-0.46	0.15	0.51	0.129948	0.013043	0.0109342	0.00159199	0.0329445	0.999511	0.999795	0.990707
10-Deoxymethymycin	C25 H43 N O6	69798.1	11247.3	6859.81	8097.87	131161	115319	85073.9	46257.9	30612.9	2.63	3.35	3.11	-0.91	-0.72	-0.29	0.59	1.19	0.00456259	0.00163193	0.00169548	1.66631e-05	0.00050165	0.0702714	0.988524	0.15047
	C19 H27 N5 O2 S2	203234	177434	157074	153201	162403	170540	155127	193269	82098.2	0.2	0.37	0.41	0.32	0.25	0.39	0.07	1.31	0.998891	0.527668	0.495655	0.617148	0.756457	0.329877	1	4.05117e-06
[Similar to: NP-013366; ΔMass: -113.9833 Da]	C27 H52 N5 O2 P	4.51541e+06	810029	353874	66492.4	5.99636e+06	6.09628e+06	4.63533e+06	4.23323e+06	2.6021e+06	2.48	3.67	6.09	-0.41	-0.43	-0.04	0.09	0.8	0.0254642	0.00875083	0.00402728	0.653499	0.63495	0.982923	1	0.836147
	C19 H39 N3 O2	184830	54795.3	40236	27118.4	283226	287469	230729	165046	135010	1.75	2.2	2.77	-0.62	-0.64	-0.32	0.16	0.45	0.0379998	0.00712519	0.00335977	0.0367564	0.101551	0.963166	0.999953	0.711423
	C22 H47 N O4 S	40636.5	58959.6	88364.5	151269	14951.5	55710.3	38256	13067.1	32670.2	-0.54	-1.12	-1.9	1.44	-0.46	0.09	1.64	0.31	0.99981	0.991411	0.686494	0.999995	1	1	0.982795	0.999991
	C35 H55 N7 O	582059	116475	66634.6	50334.9	831586	919488	618751	786270	507784	2.32	3.13	3.53	-0.51	-0.66	-0.09	-0.43	0.2	0.173071	0.0888829	0.0793167	0.973374	0.92405	0.99729	1	0.98441
O-heptadecanoylcarnitine	C24 H47 N O4	252544	71502.3	67495.4	39242.8	341326	336128	1.18113e+06	196671	186683	1.82	1.9	2.69	-0.43	-0.41	-2.23	0.36	0.44	0.465825	0.331987	0.219125	0.816382	0.841556	3.95461e-12	0.999601	0.981147
8653IQ20EA	C23 H39 N O4	120011	29871.8	12242.7	8802.58	195637	186859	143222	117367	91970.8	2.01	3.29	3.77	-0.71	-0.64	-0.26	0.03	0.38	0.751361	0.609698	0.669812	0.909194	0.93032	0.999917	1	0.996229
		490677	146348	73819.4	59025.3	186355	201417	165232	249659	181964	1.75	2.73	3.06	1.4	1.28	1.57	0.97	1.43	0.0346592	0.00547896	0.00115995	0.190217	0.231728	0.0427995	0.592009	0.0642456
		190087	240382	116456	274420	220285	159782	132474	198926	541503	-0.34	0.71	-0.53	-0.21	0.25	0.52	-0.07	-1.51	0.992366	0.999935	0.93219	1	1	0.999993	0.999996	0.00180871
	C21 H48 N6 O S	398690	148430	99783.9	67025.3	261701	287343	65123.7	531652	374711	1.43	2	2.57	0.61	0.47	2.61	-0.42	0.09	0.0164966	0.00022087	3.90351e-05	0.30459	0.495009	4.94686e-05	0.225827	0.999975
alonimid	C14 H13 N O3	73533.1	76004.2	62509.4	97069.1	34740.7	29964.4	26597.7	93769.3	31437.9	-0.05	0.23	-0.4	1.08	1.3	1.47	-0.35	1.23	0.398995	1	0.995606	0.998402	1	0.998318	0.99985	0.998572
[Similar to: Protirelin; ΔMass: 112.1204 Da]		291320	196062	166220	162006	234267	279350	175966	268539	441882	0.57	0.81	0.85	0.31	0.06	0.73	0.12	-0.6	0.994489	0.965303	0.942185	0.999898	1	0.896432	1	0.177722
	C19 H45 N9 O P2	462808	41431.5	39720.5	17639.7	615342	637297	443708	455823	258794	3.48	3.54	4.71	-0.41	-0.46	0.06	0.02	0.84	0.00954667	0.00532622	0.00367137	0.522157	0.729588	0.999969	1	0.917009
	C23 H46 N7 P	1.24983e+06	474064	293814	166789	743581	744941	150119	1.7987e+06	1.02502e+06	1.4	2.09	2.91	0.75	0.75	3.06	-0.53	0.29	0.000257292	9.32438e-06	7.30419e-07	0.0240016	0.168729	1.17461e-06	0.0178955	0.892147
N-[(10Z)-7-Isobutyl-3-isopropyl-5,8-dioxo-2-oxa-6,9-diazabicyclo[10.2.2]hexadeca-1(14),10,12,15-tetraen-4-yl]-N~2~,N~2~-dimethylisoleucinamide	C28 H44 N4 O4	91196.8	71428.4	45527.1	57940	37529.1	30810.5	39140.5	65523.2	273020	0.35	1	0.65	1.28	1.57	1.22	0.48	-1.58	0.999734	0.993468	0.998641	0.988073	0.980494	0.974805	0.999754	0.00716327
[Similar to: NP-022473; ΔMass: 351.2765 Da]	C42 H64 N3 P S	280721	281068	202729	241868	195221	182205	202558	196076	270904	0	0.47	0.21	0.52	0.62	0.47	0.52	0.05	1	0.979044	0.983762	0.974992	0.902634	0.951343	0.965011	0.997589
[Similar to: 1-[(5-methyl-3-phenylisoxazol-4-yl)carbonyl]-1,2,3,4,6,10b-hexahydropyrimido[2,1-a]isoindol-6-one; ΔMass: 188.2813 Da]	C30 H59 N O8	605694	551671	505312	526227	403222	445760	398447	607638	166720	0.13	0.26	0.2	0.59	0.44	0.6	0	1.86	0.993328	0.3281	0.392902	0.00338735	0.00506775	0.00113055	1	4.40796e-11
[Similar to: NP-003749; ΔMass: 336.4341 Da]		365119	299081	204300	203090	286258	342689	293023	330015	160710	0.29	0.84	0.85	0.35	0.09	0.32	0.15	1.18	0.964208	0.139852	0.227726	1	0.990023	0.882037	0.974019	0.0209125
5-Nitro-o-toluidine	C7 H8 N2 O2	171323	39486.5	24331.3	26610.3	155942	173824	127564	168868	38191.6	2.12	2.82	2.69	0.14	-0.02	0.43	0.02	2.17	0.0120223	0.000787656	0.000772284	0.366806	0.90553	0.15753	0.999355	0.000249207
	C27 H37 N O7	16114.2	15273.4	14252.2	14949.7	16232.7	15804.1	15878.9	14573.6	630351	0.08	0.18	0.11	-0.01	0.03	0.02	0.14	-5.29	1	1	1	1	1	1	1	2.23388e-06
3-[(4E,7E,10E,13E,16E)-4,7,10,13,16-Docosapentaenoyloxy]-4-(trimethylammonio)butanoate	C29 H47 N O4	96483.6	19453	14073.4	12603.4	147097	211790	577384	93313.4	61082.7	2.31	2.78	2.94	-0.61	-1.13	-2.58	0.05	0.66	0.928255	0.867715	0.850365	0.837807	0.872137	3.76567e-08	1	0.999099
	C33 H55 N3 O3	250601	25549.9	24404.4	24262.4	189783	251355	25386.5	538466	24992	3.29	3.36	3.37	0.4	0	3.3	-1.1	3.33	0.0229503	0.0211203	0.0219991	0.985603	0.999832	0.0216925	0.0363086	0.0130542
	C30 H44 N2	150577	113444	55594.5	140680	44853.4	75046.8	82417.6	35833.2	19286.2	0.41	1.44	0.1	1.75	1	0.87	2.07	2.96	0.984927	0.941887	0.982097	0.979178	1	0.89667	0.650093	0.1957
	C29 H42 N2	97281.8	69721.2	28696.1	53180.2	20634.1	22170.5	46961.6	17853.2	17762.9	0.48	1.76	0.87	2.24	2.13	1.05	2.45	2.45	0.876778	0.671668	0.631144	0.69363	0.999831	0.591887	0.370151	0.148108
	C15 H22 N9 O P	7591.12	311760	321827	330894	7076.46	7209.17	8065.11	6133.43	13273.8	-5.36	-5.41	-5.45	0.1	0.07	-0.09	0.31	-0.81	1.27254e-12	8.58646e-13	8.90066e-13	1	1	1	1	1
[Similar to: NP-013366; ΔMass: -33.9206 Da]	C32 H64 N O6 P	1.01549e+06	161288	95467.5	65042.1	1.11993e+06	1.17728e+06	821167	1.20101e+06	528161	2.65	3.41	3.96	-0.14	-0.21	0.31	-0.24	0.94	0.0697905	0.0332456	0.0273768	0.994049	0.951702	0.999403	1	0.938586
	C37 H71 O2 P3	405750	58211.4	70253.2	23939.2	283788	273106	221004	321477	146164	2.8	2.53	4.08	0.52	0.57	0.88	0.34	1.47	0.286339	0.133383	0.0713768	0.999957	1	0.938814	0.994634	0.911878
	C31 H75 N9 O10 P2	368892	66728.9	45862.9	39465	632977	608980	592280	505593	179711	2.47	3.01	3.22	-0.78	-0.72	-0.68	-0.45	1.04	0.395643	0.332039	0.31006	0.86889	0.894596	0.990381	0.999998	0.992534
	C26 H30 N2 O	33363.9	37251.4	42101.7	96029.5	40960.8	35116	31265	28992.7	28255.2	-0.16	-0.34	-1.53	-0.3	-0.07	0.09	0.2	0.24	0.999309	0.943506	0.99991	0.922488	0.876773	0.804611	0.99856	0.62516
(4S)-4-{[(9Z)-3-Hydroxy-9-hexadecenoyl]oxy}-4-(trimethylammonio)butanoate	C23 H43 N O5	424105	118345	61307.3	34025.9	387714	367953	344176	347723	254858	1.84	2.79	3.64	0.13	0.2	0.3	0.29	0.73	0.434074	0.173743	0.110144	0.994243	0.999999	0.999991	0.999907	0.996538
	C22 H47 N O	64079.1	41423.4	83966.6	145039	45503	56071.3	38122.6	23254.2	33860.3	0.63	-0.39	-1.18	0.49	0.19	0.75	1.46	0.92	1	0.99993	0.961666	1	1	0.999995	0.910935	1
	C64 H121 N O6	52020.6	25763.3	25485.6	26167.3	69101.2	28828.7	27230	104170	75802.7	1.01	1.03	0.99	-0.41	0.85	0.93	-1	-0.54	0.999993	0.99999	0.999993	0.957184	0.480574	0.999976	0.999945	0.997775
	C28 H59 N3 O3	39869	15890.7	11746.7	10701	43794.9	40967.8	26247.3	25021.3	21840.4	1.33	1.76	1.9	-0.14	-0.04	0.6	0.67	0.87	0.773268	0.999969	1	1	1	0.999978	0.999944	0.999844
N-Docosanoylglycine	C24 H47 N O3	34430.1	52631.3	131389	207258	50159	73189.8	67015.5	30675.4	59451.7	-0.61	-1.93	-2.59	-0.54	-1.09	-0.96	0.17	-0.79	1	0.999793	0.99723	1	1	0.999999	0.746647	0.981544
[Similar to: NP-013366; ΔMass: -46.8922 Da]	C30 H65 N4 O4 P	618115	86507.1	69935.1	26121.7	435270	398587	318992	339542	225748	2.84	3.14	4.56	0.51	0.63	0.95	0.86	1.45	0.0905543	0.0263708	0.00989354	0.999993	0.999994	0.865952	0.749106	0.751918
	C7 H5 N7 O2	6201.34	5465.56	5762.1	5353.72	6290.82	6403.54	5856.32	5649.65	11308.9	0.18	0.11	0.21	-0.02	-0.05	0.08	0.13	-0.87	0.999246	0.998007	0.997428	0.999929	0.999999	1	1	1
		389347	17681.1	19858.9	17917.7	20206.3	20542.9	141626	151581	250898	4.46	4.29	4.44	4.27	4.24	1.46	1.36	0.63	0.00423068	0.00245855	0.00242128	0.00411637	0.0113207	0.0645247	0.555572	0.657198
	C16 H31 N O2 S	185581	36980.1	10109.6	10354.7	269924	269853	198651	182869	108990	2.33	4.2	4.16	-0.54	-0.54	-0.1	0.02	0.77	0.0135667	0.00363293	0.0027818	0.572659	0.682261	1	1	0.810735
	C39 H69 N5 O2	173830	35835	27379.4	28606.9	182465	375405	340038	216010	93111.7	2.28	2.67	2.6	-0.07	-1.11	-0.97	-0.31	0.9	0.586523	0.300037	0.297469	0.999351	1	0.986893	0.934301	0.815488
Linoleyl ethanolamide	C20 H37 N O2	463320	100896	50845.9	34753.7	577995	584916	471966	406024	208177	2.2	3.19	3.74	-0.32	-0.34	-0.03	0.19	1.15	0.251173	0.0924137	0.0692024	0.742537	0.577253	1	0.99999	0.944282
	C65 H122 N5 O5 P3 S2	188021	141364	154076	152446	118587	101389	136090	150627	203252	0.41	0.29	0.3	0.66	0.89	0.47	0.32	-0.11	1	0.999632	1	0.997388	0.938538	0.999046	0.999947	0.888882
physalin	C72 H116 O4	547012	639939	609847	584629	393638	479416	432851	576302	85195.7	-0.23	-0.16	-0.1	0.47	0.19	0.34	-0.08	2.68	0.717925	0.839907	0.957442	0.294867	0.863539	0.990977	0.997892	1.70061e-09
	C53 H105 O3 P S2	435234	109549	70283.9	75050.7	235913	161533	172524	407557	308546	1.99	2.63	2.54	0.88	1.43	1.33	0.09	0.5	0.977603	0.944757	0.958408	0.999951	0.985914	1	1	1
		477865	226030	105581	159705	766343	166318	321125	473116	314802	1.08	2.18	1.58	-0.68	1.52	0.57	0.01	0.6	1	0.930491	0.949279	0.972512	0.995976	0.998223	0.999988	0.999997
2(3H)-Furanone, dihydro-3,4-divanillyl-	C20 H22 O6	7520.8	309141	314365	321845	6938.11	7137.37	7937.94	6113.45	12884.6	-5.36	-5.39	-5.42	0.12	0.08	-0.08	0.3	-0.78	8.3733e-13	8.22564e-13	8.22453e-13	1	1	1	1	0.999999
	C18 H11 Cl N5 P	9374.01	9355.75	7125.03	8354.83	12080.9	8361.8	11301.4	8115.96	24468.1	0	0.4	0.17	-0.37	0.16	-0.27	0.21	-1.38	0.999249	0.998255	0.997572	0.999906	0.999993	1	1	1
	C28 H38 N4 O4 P2	9959.43	11688.9	9884.89	8561.79	11299.8	9933.5	11049.7	9118	29693.9	-0.23	0.01	0.22	-0.18	0	-0.15	0.13	-1.58	0.981097	0.963153	0.958543	0.988392	0.999754	0.999974	0.999997	0.999952
		102394	49988.9	33032.1	33924.8	172058	211318	854184	70069.8	198466	1.03	1.63	1.59	-0.75	-1.05	-3.06	0.55	-0.95	0.999996	0.999991	0.999982	0.999928	0.999486	4.34472e-05	1	0.999753
	C20 H45 N9 O S2	177480	123622	93977.1	84776.1	168051	168955	110951	165006	230228	0.52	0.92	1.07	0.08	0.07	0.68	0.11	-0.38	0.983013	0.867508	0.741112	0.999997	0.999999	0.962724	0.999676	0.649664
	C28 H39 N3 O	24959.2	56799.8	81626	238543	62434.4	55823.6	306916	8472	19201.8	-1.19	-1.71	-3.26	-1.32	-1.16	-3.62	1.56	0.38	0.99979	0.939574	1.78282e-05	0.999597	0.995418	0.00557105	0.999948	0.999984
	C39 H63 N3 O6 S	501845	47659.2	24798.3	25481.1	157240	71742.3	159714	231191	27001.1	3.4	4.34	4.3	1.67	2.81	1.65	1.12	4.22	0.000397134	0.000104377	0.000104169	0.00406066	0.0149137	0.0147823	0.0574682	1.19074e-05
		539661	87191.6	42391.9	36292.4	851164	815273	594312	605031	254289	2.63	3.67	3.89	-0.66	-0.6	-0.14	-0.16	1.09	0.0115473	0.00369546	0.00282687	0.521354	0.520766	1	1	0.479106
	C30 H45 N5	85923.8	16197.6	14011.1	12627.4	117170	142172	600778	67086.1	53883.2	2.41	2.62	2.77	-0.45	-0.73	-2.81	0.36	0.67	0.978153	0.95733	0.955401	0.903359	0.971797	3.18981e-08	1	0.999878
Exiguaflavanone M	C25 H30 O7	14651.7	11263.8	11118.9	12110.2	14401.8	13794.4	15134.8	10992.2	491178	0.38	0.4	0.27	0.02	0.09	-0.05	0.41	-5.07	1	1	1	1	1	1	1	1.6433e-06
Diosgenin	C27 H42 O3	320644	54375.8	39342.2	13821.7	515223	506349	273530	320576	141005	2.56	3.03	4.54	-0.68	-0.66	0.23	0	1.19	0.0922068	0.0456925	0.0316383	0.102905	0.438526	0.999998	0.999998	0.940069
[Similar to: Nervonic acid; ΔMass: 405.1908 Da]	C42 H78 N O9 P	101067	34772	30671.2	30307	150406	111030	937623	200594	71932.3	1.54	1.72	1.74	-0.57	-0.14	-3.21	-0.99	0.49	0.858856	0.916827	0.806327	1	0.999822	1.70641e-10	0.991756	0.991086
	C15 H35 N7 O8 S	75454.5	38784.5	27837.3	29336.1	89428	75601.4	30000.8	57329.9	48426.7	0.96	1.44	1.36	-0.25	0	1.33	0.4	0.64	0.0311502	0.00405337	0.00421372	0.135573	0.999999	0.004965	0.998594	0.166562
[Similar to: Trovafloxacin; ΔMass: 59.1476 Da]	C21 H34 N9 O2 P	298382	78995.6	30115.1	11719.4	742404	685383	483591	291485	272089	1.92	3.31	4.67	-1.32	-1.2	-0.7	0.03	0.13	0.0016192	0.000182991	6.85306e-05	1.43865e-06	7.88578e-06	0.236018	0.999997	0.902776
	C21 H43 N O2	1.30391e+06	188942	87929.6	58706	2.98713e+06	2.48022e+06	1.57552e+06	1.65437e+06	613306	2.79	3.89	4.47	-1.2	-0.93	-0.27	-0.34	1.09	0.21913	0.172412	0.151659	0.568271	0.679163	1	1	0.910568
	C39 H78 N7 O12 P	61107.2	52242.2	35287.2	40125.7	74664.9	96810.5	44200.7	41401.4	412499	0.23	0.79	0.61	-0.29	-0.66	0.47	0.56	-2.75	1	0.999999	0.999999	0.999846	0.999558	1	1	5.89118e-06
[Similar to: 1-[(5-methyl-3-phenylisoxazol-4-yl)carbonyl]-1,2,3,4,6,10b-hexahydropyrimido[2,1-a]isoindol-6-one; ΔMass: 276.3337 Da]	C34 H67 N O10	630690	552952	496779	523033	459009	461417	434348	587516	155872	0.19	0.34	0.27	0.46	0.45	0.54	0.1	2.02	0.983965	0.362983	0.417006	0.0680849	0.0546193	0.00989616	0.999998	7.09455e-12
9,10-Dihydroxystearic acid	C18 H36 O4	350933	173495	84590.7	34230.5	232744	224096	324006	280449	127522	1.02	2.05	3.36	0.59	0.65	0.12	0.32	1.46	0.880255	0.267546	0.477163	0.999967	0.999748	0.998429	1	0.766904
(2S)-1-Hydroxy-3-(pentadecanoyloxy)-2-propanyl (9Z,12Z)-9,12-octadecadienoate	C36 H66 O5	848370	523261	130157	54850.8	497339	484056	395935	599404	314699	0.7	2.7	3.95	0.77	0.81	1.1	0.5	1.43	0.989473	0.563625	0.16491	0.998904	0.995231	0.846765	0.986965	0.870314
(3R,4S,9R,11R)-27-(4-Hydroxyphenyl)-4-methyl-3,9,11-heptacosanetriol	C34 H62 O4	261668	28520.5	26159.9	25014.5	121692	129080	103265	156180	136427	3.2	3.32	3.39	1.1	1.02	1.34	0.74	0.94	0.257615	0.187385	0.184121	0.934349	0.909029	0.689206	0.999975	0.917067
Ricinoleic Acid	C18 H34 O3	236993	133762	62661.5	40218	174383	126504	201378	153957	160184	0.83	1.92	2.56	0.44	0.91	0.23	0.62	0.57	1	0.999685	0.997315	1	1	0.999853	0.99937	1
	C22 H42 N2 O4	91898.7	47243.2	32602.7	39856.4	169236	151795	118241	49872.6	67263.5	0.96	1.5	1.21	-0.88	-0.72	-0.36	0.88	0.45	0.993721	0.957147	0.981085	0.131488	0.662998	0.956602	0.999603	0.999828
	C29 H34 N2 O2	57207.5	41678	68069.2	206850	79301.4	71812.6	51353	54750.3	27461	0.46	-0.25	-1.85	-0.47	-0.33	0.16	0.06	1.06	0.519974	0.999889	0.144772	1	1	1	1	0.999989
		1.28834e+06	488322	179292	161416	768545	758096	149715	1.8409e+06	1.0512e+06	1.4	2.85	3	0.75	0.77	3.11	-0.51	0.29	0.00200698	2.07412e-05	1.16332e-05	0.0769659	0.229757	1.76805e-05	0.0530966	0.81321
[Similar to: Palmitoyl sphingomyelin; ΔMass: 48.9468 Da]	C36 H73 N5 O9 S	300055	47354.2	45987.9	47129.6	263354	371825	426422	638147	280143	2.66	2.71	2.67	0.19	-0.31	-0.51	-1.09	0.1	0.247235	0.173155	0.161899	0.949985	0.998782	0.999967	0.983775	0.998401
	C39 H85 N10 O P3	373577	336740	258485	189462	305784	319083	348921	409199	225942	0.15	0.53	0.98	0.29	0.23	0.1	-0.13	0.73	0.999264	0.790855	0.567075	0.997942	0.998506	0.996912	0.999923	0.174265
	C37 H58 N4	349113	142872	53415.4	19598.6	280274	252266	164755	288680	226614	1.29	2.71	4.15	0.32	0.47	1.08	0.27	0.62	0.475376	0.292	0.137301	0.999959	0.999983	0.854958	0.936972	1
	C26 H50 N3 O11 P	653118	159246	67055.1	27379.4	1.26818e+06	1.24365e+06	709801	645495	462585	2.04	3.28	4.58	-0.96	-0.93	-0.12	0.02	0.5	0.00545911	0.00155173	0.000800153	0.229624	0.365074	1	0.999771	0.571529
		119056	29181.7	32333.5	31997.3	73396.4	43492.2	43177.3	128205	87684.1	2.03	1.88	1.9	0.7	1.45	1.46	-0.11	0.44	0.999642	0.999542	0.99955	0.98553	0.90907	1	1	1
	C20 H42 N2 O2	529556	206512	135581	110991	890166	932780	687379	500686	326216	1.36	1.97	2.25	-0.75	-0.82	-0.38	0.08	0.7	0.0308624	0.00695441	0.00329323	0.102482	0.110897	0.993982	0.999879	0.538468
3-hydroxyhexadecanoylcarnitine	C23 H45 N O5	202715	80492.1	25341.4	19904.7	244589	247973	205338	197873	169921	1.33	3	3.35	-0.27	-0.29	-0.02	0.03	0.25	0.914492	0.787776	0.702715	0.985665	0.998234	1	1	1
carazolol	C18 H22 N2 O2	322039	49521.1	21135.1	23767.6	57673.9	251729	60654.9	213760	26974.1	2.7	3.93	3.76	2.48	0.36	2.41	0.59	3.58	0.183949	0.0115102	0.0210315	0.302351	0.73948	0.307585	0.964538	0.0034642
	C39 H67 N5 O3	226155	27381.9	25881.4	24842.6	205906	286217	269970	285529	126834	3.05	3.13	3.19	0.14	-0.34	-0.26	-0.34	0.83	0.204825	0.182466	0.177866	0.999933	1	0.999816	1	0.978158
	C46 H91 N O8 P2	108816	107416	100860	66609.5	96560.6	65304.1	67283.3	109535	152581	0.02	0.11	0.71	0.17	0.74	0.69	-0.01	-0.49	0.865622	0.998243	0.999969	0.999954	0.998792	0.993398	0.996286	1
	C21 H36 N10 O6	239953	200759	136583	174103	122226	138163	142352	141967	118558	0.26	0.81	0.46	0.97	0.8	0.75	0.76	1.02	0.763534	0.999874	0.999934	0.995722	0.999991	0.997876	0.999721	0.999231
[Similar to: 1-[(5-methyl-3-phenylisoxazol-4-yl)carbonyl]-1,2,3,4,6,10b-hexahydropyrimido[2,1-a]isoindol-6-one; ΔMass: 232.3082 Da]	C32 H63 N O9	741883	685733	618820	622344	548517	544309	503696	716370	186474	0.11	0.26	0.25	0.44	0.45	0.56	0.05	1.99	0.998382	0.484644	0.493361	0.0398672	0.0160226	0.00782181	0.999999	1.30705e-11
	C34 H69 N2 O6 P	254861	27223.7	27624.4	24495.9	291694	371939	282493	343830	166732	3.23	3.21	3.38	-0.19	-0.55	-0.15	-0.43	0.61	0.222466	0.21999	0.207519	1	1	1	0.999738	0.997412
[Similar to: NP-013366; ΔMass: 131.1065 Da]	C49 H67 Cl O4	475262	111344	36588.5	32959.8	716417	781084	698388	671425	341549	2.09	3.7	3.85	-0.59	-0.72	-0.56	-0.5	0.48	0.186467	0.0760709	0.0723008	0.960448	0.591466	0.999998	0.999999	0.989393
	C39 H69 P3	770450	272442	191770	111529	532843	500193	818491	832773	705882	1.5	2.01	2.79	0.53	0.62	-0.09	-0.11	0.13	0.107273	0.00665174	0.00145813	0.973736	0.994897	0.996879	0.979879	1
	C29 H61 N O4	337864	27004.2	28095.6	21259.4	437881	455227	219394	401400	119364	3.65	3.59	3.99	-0.37	-0.43	0.62	-0.25	1.5	0.466612	0.360178	0.331723	0.878063	0.872347	1	1	0.986616
[Similar to: NP-003749; ΔMass: 119.1892 Da]	C26 H54 N O8 P	644353	125053	47224.9	20858.4	657998	643980	495482	529101	442005	2.37	3.77	4.95	-0.03	0	0.38	0.28	0.54	0.0104444	0.0024968	0.00122782	0.970495	0.985323	0.999977	1	0.960275
	C10 H24 N9 P	37569.5	26533.7	31697	29494.2	42330.2	41365.4	36578.2	38670.4	717204	0.5	0.25	0.35	-0.17	-0.14	0.04	-0.04	-4.25	1	1	1	1	1	1	1	1.96768e-05
	C69 H115 N5 O2	480893	617532	491239	517575	442621	276065	434407	500308	82959.7	-0.36	-0.03	-0.11	0.12	0.8	0.15	-0.06	2.54	0.544822	1	1	0.997951	0.262309	0.999998	0.999999	0.000163286
	C44 H80 N3 O8 P S	21808.8	16375	16467.2	16836.2	17399.5	19315.7	18159.4	17954.1	22884.5	0.41	0.41	0.37	0.33	0.18	0.26	0.28	-0.07	0.913446	0.776645	0.765041	0.996378	0.999638	0.997965	1	0.996046
	C33 H53 N O7 P2	96882.1	79342.3	71540	71348.4	159885	116914	229102	145032	99935.6	0.29	0.44	0.44	-0.72	-0.27	-1.24	-0.58	-0.04	0.996639	0.997091	0.998888	0.999848	0.999995	0.998906	0.999992	0.999997
	C36 H77 N9 O4 P2	483913	65489.5	72642.1	36854.2	687915	670400	647462	786528	355269	2.89	2.74	3.71	-0.51	-0.47	-0.42	-0.7	0.45	0.0194495	0.0183848	0.0120338	0.99499	1	0.999876	0.999538	0.997119
(1Z,2S)-N-[(2S,3R,4E,8E)-1,3-Dihydroxy-4,8-octadecadien-2-yl]-2-hydroxytridecanimidic acid	C31 H59 N O4	351047	35222	33187.2	36077.6	409929	399785	227956	269144	197086	3.32	3.4	3.28	-0.22	-0.19	0.62	0.38	0.83	0.719239	0.593052	0.589203	0.99915	0.989772	0.999979	1	0.996106
[Similar to: DL-Dipalmitoylphosphatidylcholine; ΔMass: -138.2343 Da]	C31 H50 N O8 P	193869	75988.6	61523.5	52302.3	91047.2	90694.9	149306	296588	327742	1.35	1.66	1.89	1.09	1.1	0.38	-0.61	-0.76	0.980672	0.957841	0.947062	0.993154	0.997841	0.999253	0.999684	0.173304
	C31 H59 N O9	183190	227540	164624	277342	121311	142745	116350	231468	217441	-0.31	0.15	-0.6	0.59	0.36	0.65	-0.34	-0.25	0.51055	0.24931	0.769298	0.142142	0.316937	0.205375	0.955443	0.353948
	C19 H34 N2 O3	276718	76301.9	43247.5	25950.2	603824	565431	169630	197806	184462	1.86	2.68	3.41	-1.13	-1.03	0.71	0.48	0.59	0.261196	0.0403416	0.03015	0.00282366	0.0320112	0.969604	1	0.953929
Paprazine	C17 H17 N O3	68187.9	8478.57	6600.79	6787.76	25753.8	48715.4	25334.8	56303	323778	3.01	3.37	3.33	1.4	0.49	1.43	0.28	-2.25	0.251771	0.206049	0.20804	0.770738	0.833463	0.728462	0.999684	0.503395
	C37 H38 N O2 P	113410	35645.2	12248.3	12828.3	275379	263179	122415	129899	243262	1.67	3.21	3.14	-1.28	-1.21	-0.11	-0.2	-1.1	0.379726	0.187214	0.175794	0.0521374	0.0646028	1	1	0.0807104
	C41 H72 N P3 S	437268	66939.2	24628.5	24292.5	124583	150400	149206	214247	33729.9	2.71	4.15	4.17	1.81	1.54	1.55	1.03	3.7	0.0010985	0.000342916	0.000360668	0.0172581	0.0250372	0.0534832	0.250401	5.82382e-05
	C27 H51 P3	134867	53784.6	33952	42054.6	171493	126118	97981	48156.8	624102	1.33	1.99	1.68	-0.35	0.1	0.46	1.49	-2.21	0.999667	0.998406	0.998732	0.997708	1	1	0.999406	0.000130133
(18Z)-18-Heptacosene-2,4-dione	C27 H50 O2	342192	35854.2	38466.9	24032.7	411836	462803	205033	362237	136489	3.25	3.15	3.83	-0.27	-0.44	0.74	-0.08	1.33	0.419774	0.287511	0.246315	0.827198	0.873197	0.999999	0.999996	0.989803
		857537	124493	116167	130146	609808	643229	815318	1.41629e+06	524415	2.78	2.88	2.72	0.49	0.41	0.07	-0.72	0.71	0.0295193	0.0186067	0.0207337	0.405526	0.666345	0.974874	0.517939	0.995953
Lercanidipine	C36 H41 N3 O6	11132	9307.37	8349.39	8660.67	10137	10894.1	11811.6	10916.8	17435.5	0.26	0.41	0.36	0.14	0.03	-0.09	0.03	-0.65	0.996553	0.987551	0.982731	1	1	0.999999	1	0.999938
	C35 H71 N O9 P2	151305	158930	112974	97646.2	78690.3	106239	89882.7	108910	179699	-0.07	0.42	0.63	0.94	0.51	0.75	0.47	-0.25	1	0.994494	0.991601	0.974438	0.997608	0.962294	0.998732	0.735709
	C23 H44 N6 O2	253972	28139.4	30534.9	21542.6	277380	362606	225329	305786	155828	3.17	3.06	3.56	-0.13	-0.51	0.17	-0.27	0.7	0.651576	0.541539	0.507275	0.938165	0.941311	1	1	0.996264
Azelnidipine	C33 H34 N4 O6	237177	82467.8	27099.1	19060.9	215136	276621	132656	204912	95166.2	1.52	3.13	3.64	0.14	-0.22	0.84	0.21	1.32	0.704634	0.483467	0.391323	1	0.999979	0.980307	0.999925	0.999759
	C17 H37 N O	61416	82785.3	56813.4	63499.3	48669.8	81385.6	98548.8	132759	89791.2	-0.43	0.11	-0.05	0.34	-0.41	-0.68	-1.11	-0.55	0.593693	0.999999	1	1	1	0.999933	0.999931	0.998686
	C36 H71 N O5	391514	64962.9	25921.7	29552.9	254125	247231	295625	207522	179532	2.59	3.92	3.73	0.62	0.66	0.41	0.92	1.12	0.382486	0.211285	0.194292	1	1	0.990423	0.999992	0.953018
	C28 H58 N O6 P	993056	165384	124306	46067.5	1.00542e+06	1.23724e+06	975220	969150	445833	2.59	3	4.43	-0.02	-0.32	0.03	0.04	1.16	0.092668	0.0321724	0.0166264	0.911536	0.595902	0.891153	1	0.969971
		591997	136272	41204.5	36802.1	819964	516151	618735	720267	440622	2.12	3.84	4.01	-0.47	0.2	-0.06	-0.28	0.43	0.0270627	0.00585779	0.0048019	0.992589	0.999999	0.999998	1	0.982086
	C18 H26 N2 O3	42478	42713.9	29717.5	31100	35016.1	40365.5	52536.9	40794	61237.5	-0.01	0.52	0.45	0.28	0.07	-0.31	0.06	-0.53	1	0.999975	0.999978	0.93953	0.987866	0.979107	0.999688	1
(2R)-1-{[(2-Aminoethoxy)(hydroxy)phosphoryl]oxy}-3-hydroxy-2-propanyl (13Z)-13-docosenoate	C27 H54 N O7 P	922959	180494	68396.9	35105.2	1.52536e+06	1.22826e+06	918190	999419	598449	2.35	3.75	4.72	-0.72	-0.41	0.01	-0.11	0.63	0.038798	0.0111803	0.00674203	0.349716	0.685329	0.999999	1	0.976155
	C29 H62 N9 P	390860	45088.9	112837	30377.3	464436	334147	434926	208101	161017	3.12	1.79	3.69	-0.25	0.23	-0.15	0.91	1.28	0.957526	0.872787	0.784929	0.999878	0.999722	0.999997	0.995941	0.998743
[Similar to: 2-(4-chlorophenoxy)-N-[5-(trifluoromethyl)-2-pyridinyl]nicotinamide; ΔMass: 80.1923 Da]	C20 H36 N5 O6 P	59627	17271	19221.9	19777.8	98367.1	86741.5	63593.8	44407.3	320901	1.79	1.63	1.59	-0.72	-0.54	-0.09	0.43	-2.43	0.997713	0.998269	0.998366	0.999533	0.999958	1	1	1.27103e-05
		217229	81645.3	50610.4	44738.8	235756	286155	122456	126443	280301	1.41	2.1	2.28	-0.12	-0.4	0.83	0.78	-0.37	0.49809	0.362351	0.305287	0.999959	1	0.982238	0.887246	0.787124
3-hydroxyhexadecanoylcarnitine	C23 H45 N O5	200411	89595.3	21001.2	15547.3	222563	367995	231448	133866	124438	1.16	3.25	3.69	-0.15	-0.88	-0.21	0.58	0.69	0.776711	0.53085	0.398635	0.995203	0.958417	0.999227	0.996452	0.979482
	C22 H40 N6 O4	78355.7	30167	25174	29603.4	76391.3	73410.4	51640.2	67326.1	2.54566e+06	1.38	1.64	1.4	0.04	0.09	0.6	0.22	-5.02	1	1	1	1	1	1	1	0.000193799
(2α)-12-Methoxyibogamine	C20 H26 N2 O	624487	171912	69913.8	60464.9	519040	426971	437873	466836	378400	1.86	3.16	3.37	0.27	0.55	0.51	0.42	0.72	0.0574627	0.0101812	0.00559661	0.999998	0.937815	0.999997	0.999999	0.989144
[Similar to: NP-022035; ΔMass: 37.2718 Da]	C23 H56 N9 O3 P	325178	320693	272215	310269	232601	242550	248836	305249	145564	0.02	0.26	0.07	0.48	0.42	0.39	0.09	1.16	0.999943	0.805705	0.952341	0.0265206	0.0292913	0.0349584	1	1.73776e-07
[Similar to: NP-013366; ΔMass: 66.0939 Da]	C36 H68 N O9 P	266007	71522.3	53250.2	58266	113411	165298	127306	267061	705056	1.89	2.32	2.19	1.23	0.69	1.06	-0.01	-1.41	0.968079	0.967434	0.966649	0.987909	0.997162	0.999834	1	0.168193
		257400	292186	266186	283067	226144	196854	217842	232931	439733	-0.18	-0.05	-0.14	0.19	0.39	0.24	0.14	-0.77	1	0.999995	1	0.999995	0.992499	0.999781	0.999526	0.336885
	C21 H54 N8 O4 P2	55717.2	46301.2	37157.1	36938.6	29477.4	27704.3	27092.7	42425.6	184865	0.27	0.58	0.59	0.92	1.01	1.04	0.39	-1.73	0.999784	0.994215	0.999253	0.989648	0.98951	0.979067	0.999776	0.00360235
[Similar to: 1-[(5-methyl-3-phenylisoxazol-4-yl)carbonyl]-1,2,3,4,6,10b-hexahydropyrimido[2,1-a]isoindol-6-one; ΔMass: 320.3592 Da]	C31 H68 N9 O6 P	397225	360867	319867	322677	317444	298327	297617	348220	87624.1	0.14	0.31	0.3	0.32	0.41	0.42	0.19	2.18	0.999693	0.516732	0.610954	0.304483	0.106478	0.107625	0.999746	1.07662e-11
Tris(2-butoxyethyl) phosphate	C18 H39 O7 P	22193.7	12982.6	8267.93	10908.6	12378.5	20424.6	42258.4	24408.3	14268	0.77	1.42	1.02	0.84	0.12	-0.93	-0.14	0.64	1	1	1	0.999999	1	1	1	0.911497
[Similar to: 6-bromo-2-(3-pyridylmethyl)-2,3-dihydro-1H-benzo[de]isoquinoline-1,3-dione; ΔMass: 215.4500 Da]	C25 H60 N9 O4 P	395774	390277	372234	350643	292641	304669	301375	371286	163763	0.02	0.09	0.17	0.44	0.38	0.39	0.09	1.27	0.999999	0.803518	0.618137	0.0237428	0.0366625	0.0172624	0.999725	5.56249e-09
	C28 H41 O3 P	95207.6	51144.9	19750	25935.6	40331.8	52972.8	54680.7	64626.5	179596	0.9	2.27	1.88	1.24	0.85	0.8	0.56	-0.92	0.968527	0.534006	0.578579	0.752821	0.753789	0.74546	0.79113	0.930772
	C24 H35 N3 S	420475	301957	231469	233060	259156	284190	264403	395957	130485	0.48	0.86	0.85	0.7	0.57	0.67	0.09	1.69	0.219409	0.00405653	0.00206443	0.0441808	0.0532667	0.0188344	1	1.38195e-07
[Similar to: 5-(tert-butyl)-N-(3-methoxyphenyl)-2-methyl-1-phenyl-1H-pyrrole-3-carboxamide; ΔMass: 374.3739 Da]	C39 H81 N2 O8 P	287672	40986.9	41395.9	37407.7	324393	365639	357938	387304	138680	2.81	2.8	2.94	-0.17	-0.35	-0.32	-0.43	1.05	0.0802129	0.0787144	0.0694472	1	0.999285	0.999877	0.998218	0.951817
	C22 H44 N2 O4 P2 S	431439	394701	329766	339745	388459	389188	367941	420611	201352	0.13	0.39	0.34	0.15	0.15	0.23	0.04	1.1	0.999934	0.506016	0.298591	0.994884	0.80266	0.810524	0.999999	3.00059e-05
[Similar to: PEG Monolaurate n7; ΔMass: 371.2672 Da]	C59 H81 N3 O3	276968	256207	235114	252194	218645	192353	198075	257589	33559.1	0.11	0.24	0.14	0.34	0.53	0.48	0.1	3.04	0.996141	0.858321	0.993777	0.0617466	0.0371367	0.0152626	0.999995	2.42047e-11
	C30 H53 N5	175128	53583.1	37832	36858.4	246386	213822	183093	174739	99577.8	1.71	2.21	2.25	-0.49	-0.29	-0.06	0	0.81	0.892466	0.77591	0.770262	0.998305	0.978285	0.986424	1	0.997039
(4S,9R,11R)-9,11-Dihydroxy-27-(4-hydroxyphenyl)-4-methyl-3-heptacosanone	C34 H60 O4	39401.8	106751	125405	222002	81584.7	80553.7	126434	38341.2	34544.4	-1.44	-1.67	-2.49	-1.05	-1.03	-1.68	0.04	0.19	0.800768	0.808166	0.000720587	0.354286	0.797843	0.482382	1	1
	C28 H62 N P3 S	677557	141394	52451.1	48260.6	1.06094e+06	963904	575773	678665	287582	2.26	3.69	3.81	-0.65	-0.51	0.23	0	1.24	0.12781	0.0719697	0.0609584	0.863752	0.937528	1	0.999992	0.931969
	C9 H20 N2	129603	157666	171566	157763	158037	113442	178327	149264	83999.3	-0.28	-0.4	-0.28	-0.29	0.19	-0.46	-0.2	0.63	0.999976	0.952271	0.889295	0.92319	0.967048	0.985291	0.917674	0.470997
PEG Monolaurate n7	C26 H52 O9	318753	316595	278766	277358	193677	229922	247361	276667	180471	0.01	0.19	0.2	0.72	0.47	0.37	0.2	0.82	0.998572	0.904322	0.979457	0.209207	0.53307	0.716671	0.99575	0.103841
	C10 H26 N9 P	225261	85881.1	65330.3	20359.1	140132	205182	233397	298138	105604	1.39	1.79	3.47	0.68	0.13	-0.05	-0.4	1.09	0.924016	0.87277	0.795916	0.99999	0.994588	0.999997	1	0.991281
	C16 H35 N3 O2	22082.1	9827.54	17890.1	7016.55	9608	12263.6	8999.85	8420.27	12404	1.17	0.3	1.65	1.2	0.85	1.29	1.39	0.83	0.967055	0.999993	0.999999	0.999988	0.999991	0.999679	0.999491	0.999035
(18Z)-18-Heptacosene-2,4-dione	C27 H50 O2	70107.7	12787.2	12391.5	12862.5	111028	90579.6	71464.7	74008.8	24851.2	2.45	2.5	2.45	-0.66	-0.37	-0.03	-0.08	1.5	0.546512	0.526916	0.53486	0.902658	0.916657	0.999999	0.999871	0.897399
	C20 H40 N6 O3 S	163016	32130.1	17780.3	7681.6	250125	195124	162812	107961	69010.5	2.34	3.2	4.41	-0.62	-0.26	0	0.59	1.24	0.740841	0.588148	0.470285	0.713263	0.888529	0.999693	0.996005	0.995758
	C14 H22 N3 P S	156489	37823.6	22000.2	27031	200776	200449	157397	142434	52033.8	2.05	2.83	2.53	-0.36	-0.36	-0.01	0.14	1.59	6.28633e-05	1.07352e-05	1.42692e-05	0.102004	0.0550788	0.999998	1	7.26472e-05
	C29 H64 N9 O P	300995	80073.5	88098.8	32330.9	186007	172519	214033	134747	162777	1.91	1.77	3.22	0.69	0.8	0.49	1.16	0.89	0.790712	0.389656	0.0502121	0.986808	0.995972	0.91476	0.586627	0.87332
[Similar to: NP-013366; ΔMass: -73.9878 Da]	C27 H55 N3 O6 S	384834	92608.5	42849.5	39399.1	554177	592432	375251	390199	245278	2.06	3.17	3.29	-0.53	-0.62	0.04	-0.02	0.65	0.0421784	0.0186165	0.0171143	0.79242	0.854075	0.999646	0.999715	0.866234
	C32 H56 O4	319035	37925.5	24933.5	24218.6	203680	235513	155954	211993	162724	3.07	3.68	3.72	0.65	0.44	1.03	0.59	0.97	0.269972	0.0989452	0.0705292	0.999608	0.999947	0.874952	0.943546	0.997864
	C28 H59 N4 O5 P	325153	64804.5	70525.6	29201.9	140036	157286	198453	71343	173973	2.33	2.2	3.48	1.22	1.05	0.71	2.19	0.9	0.943247	0.545661	0.289714	0.997777	0.997821	0.97122	0.768846	0.999919
		196944	43902.2	36937.1	39051.2	40835.1	42836.4	45256.7	183707	164356	2.17	2.41	2.33	2.27	2.2	2.12	0.1	0.26	0.995978	0.99546	0.99579	0.996392	0.972892	1	1	1
		303683	204928	197022	182496	144181	155552	206813	286340	44877.3	0.57	0.62	0.73	1.07	0.97	0.55	0.08	2.76	0.485891	0.0999614	0.0227492	0.000421061	0.0067705	0.037416	0.962634	5.04256e-09
	C8 H9 N7 O4 S	7354.03	6063.88	5363.07	5757.61	7489.68	8207.83	7385.32	6164.12	24110.5	0.28	0.46	0.35	-0.03	-0.16	-0.01	0.25	-1.71	1	0.999585	0.99966	0.986599	0.998157	1	1	1
	C21 H45 N O12	70644.8	123698	198700	200170	32643.3	36898.5	36104.4	30871.1	44836.3	-0.81	-1.49	-1.5	1.11	0.94	0.97	1.19	0.66	0.499065	0.0116971	0.0218371	0.903399	1	0.995677	0.766911	0.905687
[Similar to: 5-[(1S,3aR,4S,6aR)-4-(3,4,5-trimethoxyphenyl)-hexahydrofuro[3,4-c]furan-1-yl]-2H-1,3-benzodioxole; ΔMass: 111.1752 Da]	C25 H46 N5 O4 P	327175	36912.4	10571.6	9818.97	380548	340675	238000	307768	193367	3.15	4.95	5.06	-0.22	-0.06	0.46	0.09	0.76	0.013612	0.00446708	0.00419272	0.998901	0.997318	0.992237	0.999988	0.970218
	C18 H21 N3 O S	215524	187947	137844	109686	130428	168620	149653	232593	129784	0.2	0.64	0.97	0.72	0.35	0.53	-0.11	0.73	1	0.549754	0.230538	0.741001	0.750746	0.804797	0.999778	0.522638
	C54 H91 O15 P	134210	125925	117801	102165	94586.9	95244.1	108194	107288	142528	0.09	0.19	0.39	0.5	0.49	0.31	0.32	-0.09	1	0.996406	0.99826	0.94926	0.874803	0.936338	0.999425	0.999394
	C17 H41 N4 O3 P	51490.3	41516.2	31251.3	35802.3	24848	28366.9	27412.8	43990.8	166286	0.31	0.72	0.52	1.05	0.86	0.91	0.23	-1.69	0.999849	0.995323	0.999225	0.992374	0.991093	0.982471	0.999933	0.00324858
1,3-Dihydroxy-2-propanyl icosanoate	C23 H46 O4	89364.6	16592.3	16664.4	16849.5	130799	134340	90394.7	106963	55892.3	2.43	2.42	2.41	-0.55	-0.59	-0.02	-0.26	0.68	0.757327	0.694359	0.694225	0.852609	0.90149	1	0.999999	0.995919
[Similar to: 2-Arachidonoyl glycerol; ΔMass: 123.0091 Da]	C20 H39 N9 O4 S	189451	38920	21432.7	10850.1	223340	212964	258399	228406	159443	2.28	3.14	4.13	-0.24	-0.17	-0.45	-0.27	0.25	0.0971479	0.0305383	0.0445152	0.999981	0.999444	0.908053	1	0.998913
	C14 H32 N9 P	248854	94887.3	74673.6	35545.3	283355	283140	265401	241695	238449	1.39	1.74	2.81	-0.19	-0.19	-0.09	0.04	0.06	0.274209	0.145762	0.0857348	1	1	1	1	0.998378
2-NP-AOZ	C10 H9 N3 O4	92563.2	16614.1	7119.22	7476.61	152849	140688	112361	65634.8	45859.5	2.48	3.7	3.63	-0.72	-0.6	-0.28	0.5	1.01	0.138414	0.0731197	0.0662773	0.822681	0.948207	0.999559	0.981683	0.558588
	C32 H31 N8 P	182545	245599	194756	259362	112457	129208	107940	214319	20165.8	-0.43	-0.09	-0.51	0.7	0.5	0.76	-0.23	3.18	0.999302	0.99962	0.561333	0.824238	0.648453	0.484655	0.999648	0.000225204
	C44 H66 O9	186611	21095.3	19199.5	20696.2	29083.4	63586	33581.7	117981	225693	3.15	3.28	3.17	2.68	1.55	2.47	0.66	-0.27	0.686019	0.598171	0.61634	0.706629	0.947024	0.899128	1	0.565122
	C15 H15 N O S	51832.6	18661.5	11936.7	14596.1	23296.6	43264	19094.4	51259.7	11749.2	1.47	2.12	1.83	1.15	0.26	1.44	0.02	2.14	1	0.748904	0.946128	0.942236	1	0.995458	0.999999	0.573224
	C20 H36 N4 O3 S	176069	137181	157664	360371	66556.5	73732.7	46717.8	96001.9	31403.9	0.36	0.16	-1.03	1.4	1.26	1.91	0.88	2.49	0.999993	0.841507	0.014406	0.967201	0.995281	0.644222	0.999172	0.381671
	C27 H57 N O4	101612	19033.8	19167.7	19413.6	115163	139444	82972.3	121427	54934.8	2.42	2.41	2.39	-0.18	-0.46	0.29	-0.26	0.89	0.776175	0.668904	0.671904	0.884864	0.867933	1	1	0.996089
	C16 H41 N7 O2 S	208811	56023	22554.4	20481	315421	335942	197585	203412	182452	1.9	3.21	3.35	-0.6	-0.69	0.08	0.04	0.19	0.761611	0.557931	0.479476	0.566462	0.604919	0.99632	1	0.999973
	C39 H72 N6	37713.2	16184.9	16220.9	25033.3	16015.7	18759.2	15853.1	15574.6	20278.3	1.22	1.22	0.59	1.24	1.01	1.25	1.28	0.9	0.85356	0.999992	1	0.999998	1	0.999865	0.999853	0.999713
		176670	211372	188171	158961	159953	155409	179583	218313	24368.8	-0.26	-0.09	0.15	0.14	0.18	-0.02	-0.31	2.86	0.999872	0.982036	0.999663	0.999595	0.982642	0.998343	0.999999	1.77051e-05
	C23 H41 N O	9584.47	11231.1	36963.3	40434.6	11322.9	9678.48	9147.91	8191.54	10029.8	-0.23	-1.95	-2.08	-0.24	-0.01	0.07	0.23	-0.07	0.992034	0.999984	1	0.996539	0.999975	0.99071	0.998346	0.990372
	C18 H26 N2 O3	40345	26983.6	16629.4	15189.4	79284.2	69262.1	66358.3	28369.8	99542.1	0.58	1.28	1.41	-0.97	-0.78	-0.72	0.51	-1.3	0.997648	0.989891	0.985159	0.999392	0.999627	1	1	1
	C25 H56 N9 P	304484	187770	113151	30950.8	260312	253788	212035	163842	228895	0.7	1.43	3.3	0.23	0.26	0.52	0.89	0.41	0.75161	0.372698	0.054847	1	1	0.99943	0.752612	0.999808
	C22 H51 N4 O3 P	300962	69924.4	40719	23075.8	311780	395582	243678	352091	186187	2.11	2.89	3.71	-0.05	-0.39	0.3	-0.23	0.69	0.675614	0.51877	0.478834	0.967602	0.97237	0.999997	0.999992	0.996512
		341890	54853	19930.2	14371.2	668127	550436	350575	362048	236594	2.64	4.1	4.57	-0.97	-0.69	-0.04	-0.08	0.53	0.00375161	0.00140385	0.000840273	0.293005	0.457013	1	0.99147	0.55592
		155196	153646	172976	167551	196608	177780	177674	170623	108589	0.01	-0.16	-0.11	-0.34	-0.2	-0.2	-0.14	0.52	0.999963	0.999949	0.997727	0.891932	0.185761	0.999885	0.998932	0.919578
	C17 H37 N O	73582.5	172542	99494.9	105001	120964	140904	97135.1	101753	120972	-1.23	-0.44	-0.51	-0.72	-0.94	-0.4	-0.47	-0.72	0.66952	1	1	1	1	1	0.999974	0.998761
	C30 H63 O4 P S	68600.8	15327	15226.3	15881.2	43193.6	41659.4	37328.6	211477	77630.4	2.16	2.17	2.11	0.67	0.72	0.88	-1.62	-0.18	0.603988	0.458547	0.517485	0.926373	0.932478	0.723972	0.0331813	0.999999
	C35 H37 N3 O6	8870.24	12428.8	12624.9	13436.8	8477.93	9359.97	8697.76	8237.34	16708	-0.49	-0.51	-0.6	0.07	-0.08	0.03	0.11	-0.91	0.997481	0.990352	0.988041	0.999998	1	1	1	0.99993
	C37 H38 N4 P2	66405.4	19597.7	8626.31	8450.98	104403	131128	70578.7	33006.5	92049.5	1.76	2.94	2.97	-0.65	-0.98	-0.09	1.01	-0.47	0.997092	0.968359	0.952497	0.486897	0.764949	0.982386	0.999997	0.934864
[Similar to: 1-[(5-methyl-3-phenylisoxazol-4-yl)carbonyl]-1,2,3,4,6,10b-hexahydropyrimido[2,1-a]isoindol-6-one; ΔMass: 147.2708 Da]	C32 H56 O5	566698	179989	103995	55782	493143	406610	376708	279800	295753	1.65	2.45	3.34	0.2	0.48	0.59	1.02	0.94	0.357141	0.0557928	0.0400866	0.999995	0.999999	0.9773	0.76037	0.857617
	C34 H67 N O6	374826	99504.3	66543.1	32872.4	282227	263163	214792	180864	175325	1.91	2.49	3.51	0.41	0.51	0.8	1.05	1.1	0.748125	0.159032	0.0613427	0.999283	0.999725	0.819855	0.655821	0.98
	C22 H21 N3 S2	413096	337787	297473	315441	284747	295379	297400	371567	178758	0.29	0.47	0.39	0.54	0.48	0.47	0.15	1.21	0.72347	0.284451	0.413131	0.21307	0.201357	0.107646	0.999566	2.2678e-05
	C28 H59 N O4	137793	21212.9	20439.6	20695.3	127312	147002	107275	158933	67556.1	2.7	2.75	2.74	0.11	-0.09	0.36	-0.21	1.03	0.667421	0.565173	0.557802	0.97636	0.982208	0.999973	0.999997	0.991426
	C25 H29 N3	47633.4	12452.1	40621.7	16445	19269	29553.4	13836	12626.9	28114.8	1.94	0.23	1.53	1.31	0.69	1.78	1.92	0.76	0.999999	0.85916	0.99998	1	1	0.999986	0.999995	0.992773
	C14 H39 N9 O9	216939	41863.5	13091.6	11574.4	280497	254061	152119	236199	150211	2.37	4.05	4.23	-0.37	-0.23	0.51	-0.12	0.53	0.202437	0.0991026	0.0826216	0.999999	1	0.986003	1	0.976634
	C15 H32 N2 O2	316274	326228	208270	279608	270792	393974	399703	259756	298440	-0.04	0.6	0.18	0.22	-0.32	-0.34	0.28	0.08	0.999986	0.997893	1	1	0.999688	0.975656	1	0.997694
	C23 H43 N10 O5 P	185102	43051.4	18214.3	17300.4	393115	332193	254696	148405	33753.3	2.1	3.35	3.42	-1.09	-0.84	-0.46	0.32	2.46	0.0890442	0.0311097	0.0277002	0.102126	0.212831	0.99965	0.99999	0.300415
		36424.7	34694.7	30817.7	31006.1	31824.5	32617.5	30779.5	31088.3	40265.3	0.07	0.24	0.23	0.19	0.16	0.24	0.23	-0.14	0.999932	0.997807	0.99779	0.998603	0.999321	0.998479	0.996169	0.979682
	C18 H36 N5 O5 P	31154.1	7663.24	6668.05	6970.38	57393.8	54792.8	35569.4	21428	270779	2.02	2.22	2.16	-0.88	-0.81	-0.19	0.54	-3.12	0.999854	0.999821	0.999835	0.999853	0.99989	1	1	3.29585e-06
	C12 H27 N O	43680.1	67153	50524.8	70547.3	312121	413626	158061	36218.8	348854	-0.62	-0.21	-0.69	-2.84	-3.24	-1.86	0.27	-3	1	0.999774	0.999999	0.0302366	0.00122814	0.108563	0.999996	0.000632843
3-[(3-Hydroxydecanoyl)oxy]-4-(trimethylammonio)butanoate	C17 H33 N O5	204302	97470.2	47760.4	38516.7	200507	188295	158456	187766	141039	1.07	2.1	2.41	0.03	0.12	0.37	0.12	0.53	0.866896	0.436027	0.53065	0.999949	0.999998	0.999999	1	1
[Similar to: NP-003749; ΔMass: 338.3162 Da]	C40 H67 N6 O6 P	350628	58953.9	33876.6	31293.6	478441	521496	424461	340120	249472	2.57	3.37	3.49	-0.45	-0.57	-0.28	0.04	0.49	0.0232566	0.00972398	0.00879412	0.999121	0.879143	1	0.998909	0.832091
5-Methylangelicin	C12 H8 O3	111925	9179.27	5339.2	5524.14	44115	82381.5	40521.1	90349	20372.3	3.61	4.39	4.34	1.34	0.44	1.47	0.31	2.46	0.272857	0.197049	0.19693	0.981475	0.999942	0.896782	0.999994	0.270212
[Similar to: NP-003749; ΔMass: 281.4074 Da]		385803	367455	316305	325604	288234	265085	274670	340921	56018.5	0.07	0.29	0.24	0.42	0.54	0.49	0.18	2.78	0.99803	0.595561	0.8606	0.00553605	0.00555239	0.0275317	0.999444	1.53006e-11
	C22 H41 N3 O8	350380	284534	218247	244948	156218	119591	167366	340462	20030.3	0.3	0.68	0.52	1.17	1.55	1.07	0.04	4.13	0.652392	0.0404566	0.169412	7.41229e-05	8.04746e-05	0.000143864	0.999958	9.06648e-11
	C39 H81 N5 O9 S2	351510	44365.6	41473.3	43950.7	260458	288910	313167	749974	258019	2.99	3.08	3	0.43	0.28	0.17	-1.09	0.45	0.0414013	0.00957731	0.00974671	0.636148	0.779067	0.99859	0.0191361	0.823974
(2S)-1-Hydroxy-3-(pentadecanoyloxy)-2-propanyl (9Z,12Z,15Z)-9,12,15-octadecatrienoate	C36 H64 O5	882678	108011	132510	39488.2	609884	583320	533840	493151	334947	3.03	2.74	4.48	0.53	0.6	0.73	0.84	1.4	0.249976	0.0709587	0.0292203	0.993084	0.991938	0.841697	0.794716	0.724632
	C22 H44 N2 O	22373.6	12771.3	28530.8	17486.2	24499.6	38162.6	22343.4	78293.4	236677	0.81	-0.35	0.36	-0.13	-0.77	0	-1.81	-3.4	1	1	1	1	0.999998	1	0.997851	0.0462866
[Similar to: Palmitoyl sphingomyelin; ΔMass: -81.1673 Da]	C31 H60 N O9 P	312648	148759	97727.4	81614.3	132973	176148	274794	377952	716698	1.07	1.68	1.94	1.23	0.83	0.19	-0.27	-1.2	0.996249	0.987725	0.977299	0.997462	0.997732	1	0.999999	0.167876
(2R)-3-(Docosanoyloxy)-2-hydroxypropyl 2-(trimethylammonio)ethyl phosphate	C30 H62 N O7 P	723971	151596	90993.6	39188.4	953466	980844	780493	830409	509446	2.26	2.99	4.21	-0.4	-0.44	-0.11	-0.2	0.51	0.0506599	0.0220421	0.0120678	0.99147	0.930248	1	1	0.719923
(2S)-1-Hydroxy-3-(pentadecanoyloxy)-2-propanyl (9Z,12Z,15Z)-9,12,15-octadecatrienoate	C36 H64 O5	744619	86780.2	71442.9	52848.6	508873	584959	354385	512151	308406	3.1	3.38	3.82	0.55	0.35	1.07	0.54	1.27	0.124474	0.0326683	0.0202172	0.998834	0.988312	0.903482	0.887612	0.758521
		327192	54788.2	31290.4	28906.3	500381	520155	407900	409381	248011	2.58	3.39	3.5	-0.61	-0.67	-0.32	-0.32	0.4	0.107358	0.0466232	0.0434526	0.975667	0.99969	0.999975	0.999999	0.992284
	C40 H77 N2 O6 P	292279	43931.7	43504	40750	502408	507502	424849	468104	155154	2.73	2.75	2.84	-0.78	-0.8	-0.54	-0.68	0.91	0.367199	0.36298	0.346221	1	0.996971	1	0.999892	0.99925
3-dehydro-6-deoxoteasterone	C28 H48 O3	361182	104854	69788.3	31705	331862	288421	221759	170623	138241	1.78	2.37	3.51	0.12	0.32	0.7	1.08	1.39	0.372798	0.0946986	0.0431503	0.999999	0.999766	0.993483	0.538226	0.613299
	C13 H28 Cl N	18511.9	237538	366550	416230	12014.4	10852.2	9606.89	16287.4	11866.9	-3.68	-4.31	-4.49	0.62	0.77	0.95	0.18	0.64	1.20696e-11	8.15903e-13	8.15903e-13	1	1	0.999991	1	0.999997
	C20 H47 N5 O6 P2	731757	175287	63739.7	31153.6	1.23726e+06	1.17155e+06	791458	712974	519986	2.06	3.52	4.55	-0.76	-0.68	-0.11	0.04	0.49	0.00763525	0.00135663	0.000666803	0.183753	0.375432	1	0.999998	0.891094
	C31 H55 N5 O	379605	104532	83652.8	21643.5	366950	342806	263539	203130	157440	1.86	2.18	4.13	0.05	0.15	0.53	0.9	1.27	0.372746	0.140281	0.0498153	1	1	0.998573	0.647488	0.819644
	C36 H71 N O6	321397	37159	20481.4	20934	137013	133834	106716	195254	83771.3	3.11	3.97	3.94	1.23	1.26	1.59	0.72	1.94	0.441405	0.165622	0.162493	0.999608	0.997368	0.83451	0.974332	0.917635
	C52 H102 N O7 P3 S	197210	122116	112753	121500	87114.3	67512.9	79367.1	139216	156300	0.69	0.81	0.7	1.18	1.55	1.31	0.5	0.34	0.997354	0.992569	0.941039	0.785116	0.615027	0.68723	0.999766	0.983784
[Similar to: Palmitoyl sphingomyelin; ΔMass: -109.1980 Da]	C29 H56 N O9 P	383057	203638	116154	110982	204778	252300	428308	422922	889735	0.91	1.72	1.79	0.9	0.6	-0.16	-0.14	-1.22	0.997851	0.988335	0.986415	0.999153	0.999791	1	1	0.113502
		339624	71406.1	23922.4	13931.2	559165	524635	314422	374767	199004	2.25	3.83	4.61	-0.72	-0.63	0.11	-0.14	0.77	0.056713	0.0185119	0.0135997	0.86809	0.812614	1	0.999994	0.8757
N-[(9Z)-3-hydroxyhexadec-9-enoyl]sphingosine-1-phosphocholine	C39 H77 N2 O7 P	701275	212299	132213	125356	891063	881852	575430	668342	364462	1.72	2.41	2.48	-0.35	-0.33	0.29	0.07	0.94	0.00334876	0.000706801	0.000292797	0.881394	0.675297	0.999975	1	0.602039
	C20 H46 N4 O3 S	310729	279077	257119	283314	267220	269320	261584	281021	106939	0.15	0.27	0.13	0.22	0.21	0.25	0.14	1.54	1	0.914381	0.875976	0.978017	0.746851	0.788276	0.999955	4.79485e-07
	C34 H65 N O5	473564	32416.1	48412.2	33319.4	473255	362854	243008	272665	212522	3.87	3.29	3.83	0	0.38	0.96	0.8	1.16	0.627919	0.365573	0.217263	0.999974	0.999996	0.995603	0.978406	0.990149
	C28 H60 N9 O2 P3	113298	34017.5	53635.7	53192.8	13143.9	32765.2	30404.7	41686.6	27414.4	1.74	1.08	1.09	3.11	1.79	1.9	1.44	2.05	0.273145	0.51756	0.518241	0.190004	0.267501	0.969471	0.333875	0.0792573
	C35 H62 N6	19253.7	146798	273598	250116	21633.6	19959.8	20148.6	18299.9	20101	-2.93	-3.83	-3.7	-0.17	-0.05	-0.07	0.07	-0.06	0.000696568	2.66451e-10	1.29866e-11	1	0.999906	1	1	1
[Similar to: 1-[(5-methyl-3-phenylisoxazol-4-yl)carbonyl]-1,2,3,4,6,10b-hexahydropyrimido[2,1-a]isoindol-6-one; ΔMass: 147.2708 Da]	C25 H56 N6 O3 S	501069	126232	134793	37645	500707	403193	372044	273590	217531	1.99	1.89	3.73	0	0.31	0.43	0.87	1.2	0.717637	0.247891	0.113137	1	1	0.997647	0.877103	0.994429
	C30 H18 O2 P2 S2	20367.9	9656.28	5951.8	6226.88	37318.6	31572.1	12840.8	16153.4	24210.1	1.08	1.77	1.71	-0.87	-0.63	0.67	0.33	-0.25	0.995935	0.983833	0.98175	0.998946	0.999714	0.999998	1	0.999994
	C28 H51 N3 P2 S	90593.5	65133.5	55562.2	48184	57273.4	68213.5	117349	173617	257032	0.48	0.71	0.91	0.66	0.41	-0.37	-0.94	-1.5	0.998435	0.996566	0.991008	0.997316	0.9991	0.999999	1	0.140934
[Similar to: Linoleoyl Ethanolamide; ΔMass: 194.1163 Da]		402249	354442	311002	298032	226061	243113	247972	375569	125747	0.18	0.37	0.43	0.83	0.73	0.7	0.1	1.68	0.955525	0.183797	0.237971	0.00171338	0.00316019	0.000845346	1	3.00372e-09
	C19 H31 N O4	265916	48685.3	26888.2	11690.3	276641	278591	269322	249892	179860	2.45	3.31	4.51	-0.06	-0.07	-0.02	0.09	0.56	0.0705576	0.0220757	0.0138865	0.999972	0.999975	1	1	0.998757
3β-hydroxy-4β-methyl-5α-cholest-7-ene-4α-carboxylic acid	C29 H48 O3	202365	29815.5	16183.5	16903.5	165665	156398	16805.5	202591	164511	2.76	3.64	3.58	0.29	0.37	3.59	0	0.3	0.0189458	0.00598394	0.0056945	0.949179	0.998675	0.00567481	0.999903	0.924585
	C24 H44 N2 O3	247101	89642.3	58016.1	64157.5	306096	280371	295918	105742	284888	1.46	2.09	1.95	-0.31	-0.18	-0.26	1.22	-0.21	0.977257	0.844865	0.839882	0.957056	0.963483	0.956825	0.988654	0.945478
	C14 H30 Cl N O	36768.2	602054	745788	814264	20244.5	21922.8	18810.9	25696.4	25720.7	-4.03	-4.34	-4.47	0.86	0.75	0.97	0.52	0.52	2.3167e-12	8.20011e-13	8.16125e-13	0.999999	1	0.999998	1	0.999999
		416788	71353.2	30393.4	26934.1	697059	592632	397257	444946	250114	2.55	3.78	3.95	-0.74	-0.51	0.07	-0.09	0.74	0.0150803	0.00549277	0.00482827	0.683138	0.926263	0.998926	0.999843	0.716605
	C31 H42 O6 S	7311.33	7852.6	6623.31	7183.54	8848.41	7280.49	8528.74	6785.1	10261.1	-0.1	0.14	0.03	-0.28	0.01	-0.22	0.11	-0.49	0.998973	0.997129	0.996215	0.997115	0.999507	1	1	1
		214802	67165.9	34106.5	49014.1	88008.8	122642	81869.2	224671	184556	1.68	2.65	2.13	1.29	0.81	1.39	-0.06	0.22	0.999956	0.999704	0.999912	0.974151	0.928783	1	1	1
Linoleyl ethanolamide	C20 H37 N O2	326271	101288	53562.5	25211	682362	278718	498456	348614	210775	1.69	2.61	3.69	-1.06	0.23	-0.61	-0.1	0.63	0.575154	0.41599	0.323246	0.595362	0.999746	0.999999	0.999998	0.998659
[Similar to: (3S,3aR,4S,4aR,7aR,8R,9aR)-3,4a,8-trimethyl-2,5-dioxo-2H,3H,3aH,4H,4aH,5H,7aH,8H,9H,9aH-azuleno[6,5-b]furan-4-yl (2Z)-2-methylbut-2-enoate; ΔMass: 127.0839 Da]		274430	80234.2	30889.6	11844.1	752750	674679	438652	300659	282192	1.77	3.15	4.53	-1.46	-1.3	-0.68	-0.13	-0.04	0.0188432	0.00246332	0.00116105	3.02138e-05	8.18079e-05	0.490325	1	1
2-Phenylethyl D-glucopyranoside	C14 H20 O6	13105	344823	349695	384353	14330.8	15771.2	13825.2	11598.3	446245	-4.72	-4.74	-4.87	-0.13	-0.27	-0.08	0.18	-5.09	8.61868e-10	8.90817e-11	5.46149e-11	1	1	1	1	8.17901e-13
	C17 H42 N5 O4 P	320121	70871.5	44184.8	22177.3	316134	408662	315561	274242	153162	2.18	2.86	3.85	0.02	-0.35	0.02	0.22	1.06	0.0130574	0.0029004	0.00122712	0.977062	0.894906	1	0.999982	0.849831
	C20 H40 N6 O3	190207	37071.3	20942	21347.9	274062	267049	144181	149694	130258	2.36	3.18	3.16	-0.53	-0.49	0.4	0.35	0.55	0.688938	0.52953	0.483605	0.986717	0.971006	1	0.999998	0.996151
	C22 H50 N4 O3 S	304800	301630	276269	293051	298262	286424	300994	315304	78713.1	0.02	0.14	0.06	0.03	0.09	0.02	-0.05	1.95	1	0.886095	0.905532	0.993871	0.856241	0.838204	1	1.00527e-09
	C26 H35 N O8	10567.4	9937.95	9753.82	10755	10371.3	10889.2	10995.5	9908.59	25325.9	0.09	0.12	-0.03	0.03	-0.04	-0.06	0.09	-1.26	1	1	1	1	1	1	1	0.119511
	C22 H47 N O	69422.3	41116	62692.3	116593	38689.6	51004	24755.4	18523.2	31695.3	0.76	0.15	-0.75	0.84	0.44	1.49	1.91	1.13	0.998037	1	0.999699	0.999891	0.999446	0.990885	0.996687	0.992029
	C22 H46 N2 O2	16414.1	25547.7	65585.1	25800.3	15981.1	46511.4	27616.5	97966.5	327399	-0.64	-2	-0.65	0.04	-1.5	-0.75	-2.58	-4.32	1	0.999969	1	1	0.999994	1	0.999456	0.0102905
	C27 H38 N2	64199	58165.8	18907.2	19903.6	24758.8	35102.8	62580.3	18848	18410.1	0.14	1.76	1.69	1.37	0.87	0.04	1.77	1.8	0.663195	0.461348	0.274166	0.648348	0.99989	0.848157	0.358555	0.108804
	C41 H67 N O8	318697	337977	260267	228439	217483	243083	229268	248279	321428	-0.08	0.29	0.48	0.55	0.39	0.48	0.36	-0.01	0.999998	0.973853	0.906307	0.903601	0.912554	0.957323	0.976908	0.999575
	C26 H62 N9 O P3 S	35934.4	31050.9	29392.2	35805.6	30327.7	25925	30516.6	38310.2	59200.6	0.21	0.29	0.01	0.24	0.47	0.24	-0.09	-0.72	1	1	1	1	0.999995	0.967824	1	0.556473
	C39 H72 O4	260532	143759	147013	168516	87301.7	377356	153718	252887	315759	0.86	0.83	0.63	1.58	-0.53	0.76	0.04	-0.28	0.999676	0.999612	0.999751	0.996638	0.83916	1	1	0.99996
	C45 H66 N5 O P	1.04241e+06	906616	1.07504e+06	992628	434602	216967	858968	864522	1.09357e+06	0.2	-0.04	0.07	1.26	2.26	0.28	0.27	-0.07	0.999947	0.999998	0.999995	0.812031	0.50281	0.974988	0.999236	0.707445
[Similar to: Lansoprazole; ΔMass: -118.0531 Da]	C7 H5 N7 O2 S	7598.84	6713.29	6968.32	6662.96	7563.82	7981.08	7334.81	6794.63	15298	0.18	0.12	0.19	0.01	-0.07	0.05	0.16	-1.01	0.999455	0.998315	0.997603	0.999927	1	1	1	0.999999
[Similar to: 1-methyl 4-[(5R,9S,13S)-5,9,13-trimethyltetracyclo[11.2.1.0Âa,Âaâ°.0â´,âa]hexadec-14-en-5-yl]methyl butanedioate; ΔMass: 38.0482 Da]	C25 H40 N6 O	168900	41856.9	36571.5	27002.3	299335	234539	200031	41392	1.31898e+07	2.01	2.21	2.65	-0.83	-0.47	-0.24	2.03	-6.29	1	1	1	1	1	1	1	8.82845e-07
Bis(4-ethylbenzylidene)sorbitol	C24 H30 O6	323396	590607	244844	242051	566077	499133	427828	382519	1.34318e+07	-0.87	0.4	0.42	-0.81	-0.63	-0.4	-0.24	-5.38	1	1	1	1	1	1	1	1.76938e-08
	C53 H105 O2 P3	6.1934e+06	1.59274e+06	1.26384e+06	1.28619e+06	2.78627e+06	2.28244e+06	2.30814e+06	4.90927e+06	4.14485e+06	1.96	2.29	2.27	1.15	1.44	1.42	0.34	0.58	0.964955	0.928965	0.940496	0.999932	0.989634	0.999999	1	1
	C47 H86 N6 O4	3.54408e+06	1.407e+06	1.28047e+06	1.23819e+06	1.77529e+06	1.59129e+06	1.66966e+06	3.14199e+06	2.42971e+06	1.33	1.47	1.52	1	1.16	1.09	0.17	0.54	0.99465	0.988961	0.990277	0.997532	0.955333	1	1	1
		9.15367e+06	2.68332e+06	1.89469e+06	2.45919e+06	4.2803e+06	3.66143e+06	3.85126e+06	8.19943e+06	7.78345e+06	1.77	2.27	1.9	1.1	1.32	1.25	0.16	0.23	0.965103	0.92619	0.948386	0.999998	0.998121	1	1	0.999999
[Similar to: Palmitoyl sphingomyelin; ΔMass: 88.9778 Da]	C33 H80 N9 O6 P3	5.05166e+06	591812	556457	420521	2.82096e+06	2.61414e+06	6.08737e+06	1.16476e+07	4.41657e+06	3.09	3.18	3.59	0.84	0.95	-0.27	-1.21	0.19	0.532164	0.319619	0.301446	0.920146	0.924674	0.999893	0.852271	0.993759
[Similar to: (2E,6E)-3,7,11,15,19,23,27,31,35-Nonamethyl-2,6,34-hexatriacontatriene-1,11,15,19,23,27,31-heptol; ΔMass: 278.2920 Da]	C64 H126 N2 O2 P2	3.49056e+06	1.27875e+06	603138	304001	656305	1.19964e+06	2.37019e+06	7.77081e+06	7.65623e+06	1.45	2.53	3.52	2.41	1.54	0.56	-1.15	-1.13	0.98856	0.866831	0.870241	0.92006	0.941633	0.998031	0.900117	0.232045
Militarinone A	C26 H37 N O6	564743	845594	806612	345200	941661	887271	707072	580199	2.21527e+07	-0.58	-0.51	0.71	-0.74	-0.65	-0.32	-0.04	-5.29	1	1	1	1	1	1	1	2.21927e-08
[Similar to: Palmitoyl sphingomyelin; ΔMass: 121.0768 Da]	C50 H85 N3 O6	3.29195e+07	7.62694e+06	3.49789e+06	1.86111e+06	1.15421e+07	1.48983e+07	1.89572e+07	5.99752e+07	2.11491e+07	2.11	3.23	4.14	1.51	1.14	0.8	-0.87	0.64	0.11608	0.0517258	0.0307072	0.380595	0.639362	0.997359	0.00210226	1
[Similar to: 4-{[5-(7-hydroxy-5,5,8a-trimethyl-2-methylidene-decahydronaphthalen-1-yl)-3-methylpentyl]oxy}-4-oxobutanoic acid; ΔMass: 164.9913 Da]	C27 H43 N O12	49077.3	8673.19	4804.98	5120.79	28827.5	28474.9	23884	51309.3	5.07719e+06	2.5	3.35	3.26	0.77	0.79	1.04	-0.06	-6.69	1	1	1	1	1	1	1	9.36195e-06
		3.74916e+06	172466	144834	204913	755535	314576	446215	1.55462e+06	1.31408e+06	4.44	4.69	4.19	2.31	3.58	3.07	1.27	1.51	0.99366	0.991087	0.993802	0.989023	0.963122	1	1	1
1-arachidonoyl-sn-glycero-3-phosphocholine	C28 H50 N O7 P	1.13897e+07	2.20556e+06	1.13108e+06	722751	1.85825e+07	1.54881e+07	1.06354e+07	1.20986e+07	6.6123e+06	2.37	3.33	3.98	-0.71	-0.44	0.1	-0.09	0.78	0.0680231	0.0196936	0.0119797	0.592201	0.683571	1	0.999994	0.814104
		1.20529e+07	4.92389e+06	3.69093e+06	4.20522e+06	6.5436e+06	5.78447e+06	6.61233e+06	9.43756e+06	8.97413e+06	1.29	1.71	1.52	0.88	1.06	0.87	0.35	0.43	0.704665	0.497551	0.574852	0.99998	0.999965	0.999807	0.999999	0.999956
Ceramide (d18:1/22:0)	C40 H79 N O3	4.95863e+06	1.3307e+06	632381	541911	2.23265e+06	2.0275e+06	1.04101e+07	8.89174e+06	3.60646e+06	1.9	2.97	3.19	1.15	1.29	-1.07	-0.84	0.46	0.772422	0.621186	0.597978	0.961828	0.967284	0.00114161	0.202786	1
[Similar to: 1-{4-[2-(7-methoxy-2H-1,3-benzodioxol-5-yl)ethyl]phenoxy}-3-methylbutane-2,3-diol; ΔMass: 156.0944 Da]	C34 H34 N4 O2	14506.3	11793.1	11704.6	11795	14324.9	14528	14238.9	44604.4	1.69516e+07	0.3	0.31	0.3	0.02	0	0.03	-1.62	-10.19	1	1	1	1	1	1	1	7.66417e-07
[Similar to: Nervonic ceramide; ΔMass: -44.0257 Da]	C40 H77 N O2	5.0431e+06	1.2013e+06	535896	427864	2.24538e+06	2.05346e+06	1.04884e+07	8.87572e+06	3.75531e+06	2.07	3.23	3.56	1.17	1.3	-1.06	-0.82	0.43	0.821413	0.667357	0.627439	0.976013	0.982748	0.00106604	0.196483	1
	C57 H101 O P3	1.79107e+07	6.45589e+06	4.66106e+06	5.35178e+06	1.06953e+07	8.79613e+06	1.01741e+07	1.48727e+07	1.47118e+07	1.47	1.94	1.74	0.74	1.03	0.82	0.27	0.28	0.602444	0.350796	0.445009	1	1	0.999811	1	1
[Similar to: Palmitoyl sphingomyelin; ΔMass: 60.9827 Da]	C40 H74 N7 O5 P	1.33948e+07	2.94471e+06	1.61848e+06	1.06184e+06	7.96797e+06	8.18177e+06	1.22765e+07	2.49323e+07	1.06447e+07	2.19	3.05	3.66	0.75	0.71	0.13	-0.9	0.33	0.0711528	0.025456	0.015544	0.747569	0.9366	0.974069	0.306664	0.996417
	C46 H79 N3 O13	28598.4	10606.2	6672.68	7245.81	41091.6	35211.1	16522	31419.7	8.19819e+06	1.43	2.1	1.98	-0.52	-0.3	0.79	-0.14	-8.16	1	1	1	1	1	1	1	4.2864e-06
[Similar to: Nervonic ceramide; ΔMass: 44.0368 Da]		3.97118e+06	622575	140933	136386	1.62375e+06	1.5864e+06	1.25353e+07	7.02065e+06	2.57496e+06	2.67	4.82	4.86	1.29	1.32	-1.66	-0.82	0.63	0.921858	0.875861	0.869391	0.99504	0.998039	1.58028e-05	0.60286	1
[Similar to: Palmitoyl sphingomyelin; ΔMass: 117.0458 Da]	C42 H87 N5 O6 P2	3.79522e+07	6.80081e+06	3.19881e+06	2.31774e+06	1.65667e+07	1.73725e+07	1.78641e+07	5.98701e+07	2.00127e+07	2.48	3.57	4.03	1.2	1.13	1.09	-0.66	0.92	0.015406	0.00270103	0.00138216	0.260181	0.418005	0.857673	0.000707797	0.986374
[Similar to: N,N-Dimethylsphingosine; ΔMass: 310.3358 Da]	C40 H83 N3 O2	2.26767e+06	2.94834e+06	2.66914e+06	2.38718e+06	2.48685e+06	2.408e+06	2.8626e+06	2.15752e+06	1.09918e+07	-0.38	-0.24	-0.07	-0.13	-0.09	-0.34	0.07	-2.28	1	1	0.999998	0.999963	0.999843	0.999889	0.998436	0.00803531
	C53 H98 N6 O4	1.13177e+07	3.26829e+06	2.2458e+06	2.66985e+06	4.81374e+06	3.99693e+06	4.15167e+06	9.48913e+06	9.42789e+06	1.79	2.33	2.08	1.23	1.5	1.45	0.25	0.26	0.981959	0.956561	0.970511	0.999964	0.997565	1	1	0.999999
[Similar to: Palmitoyl sphingomyelin; ΔMass: 15.9944 Da]	C39 H79 N2 O7 P	1.57909e+07	3.6592e+06	1.84684e+06	1.12782e+06	2.16914e+07	2.504e+07	2.17559e+07	2.3747e+07	1.23477e+07	2.11	3.1	3.81	-0.46	-0.67	-0.46	-0.59	0.35	0.0360559	0.0130425	0.00745379	0.999959	0.992305	1	0.999903	0.963723
	C55 H94 N6 O4	3.76328e+06	1.0729e+06	790179	901554	1.50499e+06	1.43034e+06	2.52925e+06	5.28395e+06	4.72774e+06	1.81	2.25	2.06	1.32	1.4	0.57	-0.49	-0.33	0.98732	0.938217	0.952365	1	0.999853	1	0.999982	0.999785
[Similar to: Palmitoyl sphingomyelin; ΔMass: 117.0461 Da]	C42 H87 N5 O6 P2	3.29436e+07	7.66973e+06	3.32854e+06	2.14388e+06	1.84682e+07	2.06681e+07	2.01615e+07	6.29489e+07	1.90956e+07	2.1	3.31	3.94	0.83	0.67	0.71	-0.93	0.79	0.0229817	0.0049401	0.00247168	0.391422	0.587867	0.714291	0.00673926	0.974219
(3β,24R,24′R)-fucosterol epoxide	C29 H48 O2	3.93872e+07	1.07908e+07	5.31498e+06	3.70987e+06	1.86272e+07	1.80178e+07	3.48378e+06	4.93703e+07	2.55293e+07	1.87	2.89	3.41	1.08	1.13	3.5	-0.33	0.63	0.000242849	7.00822e-06	1.47695e-06	0.0290183	0.0932029	2.23169e-06	0.00730339	0.862348
[Similar to: Palmitoyl sphingomyelin; ΔMass: -30.0480 Da]	C37 H73 N2 O6 P	1.64605e+07	4.05353e+06	1.92293e+06	1.36866e+06	2.45896e+07	2.42898e+07	1.48539e+07	1.59122e+07	7.99241e+06	2.02	3.1	3.59	-0.58	-0.56	0.15	0.05	1.04	0.0746759	0.0297099	0.0179203	0.932151	0.841767	1	1	0.938339
[Similar to: Acetyl fentanyl 4-methylphenethyl analogue; ΔMass: 141.0082 Da]	C26 H36 Cl N O5	17939.4	8448.2	8665.58	7853.7	35481.6	32555	23105.4	18491.9	8.41042e+06	1.09	1.05	1.19	-0.98	-0.86	-0.37	-0.04	-8.87	1	1	1	1	1	1	1	3.26148e-05
2,5-Bis(5-tert-butyl-benzoxazol-2-yl)thiophene	C26 H26 N2 O2 S	147321	115838	104053	122372	120238	95548.5	85230.2	101490	3.21874e+06	0.35	0.5	0.27	0.29	0.62	0.79	0.54	-4.45	0.999986	0.99998	0.999896	0.998864	0.99867	0.99985	0.998685	0.206517
	C41 H81 N O6	2.42998e+06	1.89515e+06	2.80206e+06	1.9431e+06	1.95693e+06	2.63835e+06	1.8987e+06	2.22351e+06	1.87529e+06	0.36	-0.21	0.32	0.31	-0.12	0.36	0.13	0.37	0.999464	0.999998	1	0.999857	0.263048	0.999631	0.999991	0.999951
	C36 H60 N O3 P	3.91597e+06	3.59514e+06	3.08819e+06	3.38184e+06	3.79312e+06	3.93888e+06	3.9786e+06	3.56971e+06	7.05432e+06	0.12	0.34	0.21	0.05	-0.01	-0.02	0.13	-0.85	0.997946	0.963283	0.982337	1	1	1	0.999717	0.0436847
L-β,γ-Distearoyl-α-cephalin	C41 H82 N O8 P	3.64397e+07	7.52401e+06	3.78178e+06	2.62672e+06	2.29975e+07	2.48845e+07	2.83649e+07	5.34924e+07	2.55002e+07	2.28	3.27	3.79	0.66	0.55	0.36	-0.55	0.51	0.0365235	0.0117567	0.00622029	0.68717	0.888293	0.999948	0.618431	0.998219
		1.21961e+07	2.88221e+06	2.09285e+06	1.33444e+06	1.32778e+07	1.24127e+07	1.68491e+07	3.37014e+07	1.12971e+07	2.08	2.54	3.19	-0.12	-0.03	-0.47	-1.47	0.11	0.164233	0.0844402	0.0575575	0.832131	0.920821	0.987778	0.487047	0.999596
		5.93469e+06	2.29826e+06	1.57914e+06	1.94322e+06	4.14594e+06	3.57142e+06	4.08008e+06	4.71417e+06	5.78977e+06	1.37	1.91	1.61	0.52	0.73	0.54	0.33	0.04	0.84381	0.720836	0.775173	0.999991	0.993922	0.999703	1	1
	C71 H112 N2 O6 P2 S2	7.63986e+06	7.88477e+06	9.02444e+06	6.27662e+06	6.29916e+06	5.91587e+06	7.12883e+06	8.6221e+06	8.39538e+06	-0.05	-0.24	0.28	0.28	0.37	0.1	-0.17	-0.14	1	0.999631	0.995175	0.922848	0.886036	0.986313	1	0.999999
	C16 H35 N O	178890	226246	291125	368233	138600	116446	111224	114111	231882	-0.34	-0.7	-1.04	0.37	0.62	0.69	0.65	-0.37	1	1	1	0.409124	1	1	1	1
[Similar to: Palmitoyl sphingomyelin; ΔMass: 58.0124 Da]		1.62605e+08	2.86229e+07	1.47303e+07	9.23613e+06	7.87838e+07	8.47997e+07	1.43602e+08	2.0562e+08	6.24473e+07	2.51	3.46	4.14	1.05	0.94	0.18	-0.34	1.38	0.104647	0.0432405	0.0272668	0.731867	0.885016	0.914784	0.629126	0.992227
	C82 H161 O5 P3	3.02712e+06	1.4545e+06	843560	469803	763504	1.2794e+06	2.36372e+06	6.02601e+06	6.74078e+06	1.06	1.84	2.69	1.99	1.24	0.36	-0.99	-1.15	0.994893	0.913982	0.897908	0.933386	0.956942	0.999038	0.937878	0.223888
		3.54137e+06	983519	879964	1.26665e+06	2.74497e+06	1.7316e+06	2.44447e+06	4.23201e+06	4.0047e+06	1.85	2.01	1.48	0.37	1.03	0.53	-0.26	-0.18	0.997897	0.994052	0.998764	0.955727	0.936151	1	0.999978	0.999694
		1.92667e+06	574177	551036	669838	1.1669e+06	903001	997533	2.03355e+06	1.97012e+06	1.75	1.81	1.52	0.72	1.09	0.95	-0.08	-0.03	0.98258	0.98119	0.993074	0.999964	0.967969	1	0.999997	1
[Similar to: Palmitoyl sphingomyelin; ΔMass: 108.0272 Da]		2.54475e+07	2.12378e+06	1.82041e+06	1.16988e+06	1.25597e+07	1.12001e+07	1.46662e+07	4.23818e+07	1.1848e+07	3.58	3.81	4.44	1.02	1.18	0.8	-0.74	1.1	0.110385	0.0703146	0.0521709	0.706134	0.776002	0.99901	0.355979	0.981181
[Similar to: Palmitoyl sphingomyelin; ΔMass: 117.0090 Da]	C43 H78 N7 O6 P	1.2281e+07	3.58332e+06	1.8617e+06	1.67578e+06	1.08339e+07	1.49115e+07	1.44431e+07	2.66159e+07	1.44858e+07	1.78	2.72	2.87	0.18	-0.28	-0.23	-1.12	-0.24	0.430209	0.171443	0.139797	0.966865	0.992145	0.996431	0.288682	0.999983
[Similar to: 2,3-dihydroxy-1-(7-methoxy-2-oxo-2H-chromen-6-yl)-3-methylbutyl (2Z)-2-methylbut-2-enoate; ΔMass: 20.0421 Da]	C25 H24 N4 O	54176.1	15498.2	9512.76	10625.7	88163.8	70095	60179.9	40791.5	1.47986e+07	1.81	2.51	2.35	-0.7	-0.37	-0.15	0.41	-8.09	1	1	1	1	1	1	1	1.69062e-08
	C54 H105 O9 P	6.71185e+06	1.52908e+06	1.40092e+06	1.32872e+06	2.64932e+06	2.10961e+06	3.5427e+06	8.06459e+06	6.79942e+06	2.13	2.26	2.34	1.34	1.67	0.92	-0.26	-0.02	0.974892	0.917025	0.937102	0.999995	0.997471	1	0.999952	0.999767
[Similar to: Nootkatone; ΔMass: 582.3775 Da]	C48 H72 N4 O6	1.87317e+06	1.77006e+06	1.59459e+06	1.52942e+06	1.89103e+06	1.92132e+06	2.1166e+06	1.51925e+06	4.1539e+06	0.08	0.23	0.29	-0.01	-0.04	-0.18	0.3	-1.15	0.999976	0.999982	0.999423	1	1	1	0.999772	0.238907
[Similar to: 1-Linoleoyl glycerol; ΔMass: 373.2745 Da]	C35 H79 N5 O6 P2	6.60299e+06	1.30108e+06	670801	191163	3.13403e+06	3.57315e+06	1.04142e+07	1.76259e+07	5.3582e+06	2.34	3.3	5.11	1.08	0.89	-0.66	-1.42	0.3	0.289347	0.174304	0.137267	0.700411	0.733138	0.926927	0.624564	0.999986
[Similar to: Palmitoyl sphingomyelin; ΔMass: 173.1085 Da]	C54 H89 N3 O6	1.17202e+07	2.46823e+06	1.55799e+06	753235	6.85318e+06	6.45451e+06	1.08229e+07	4.61228e+07	9.58191e+06	2.25	2.91	3.96	0.77	0.86	0.11	-1.98	0.29	0.454425	0.280372	0.236696	0.790614	0.836731	0.997775	0.00182744	1
1-(1Z-hexadecenyl)-2-(9Z-hexadecenoyl)-sn-glycero-3-phosphocholine	C40 H78 N O7 P	1.76268e+07	3.20947e+06	1.53471e+06	1.18806e+06	1.15499e+07	1.01356e+07	1.24101e+07	2.21685e+07	1.01354e+07	2.46	3.52	3.89	0.61	0.8	0.51	-0.33	0.8	0.321457	0.20389	0.144012	0.99825	0.999993	0.999658	0.724051	0.999998
[Similar to: α-Aspartylphenylalanine; ΔMass: -0.0025 Da]	C17 H16 N2 S	12357.4	9614.39	9355.76	8910.42	11488.4	12241.3	13232	11147.3	7.14291e+06	0.36	0.4	0.47	0.11	0.01	-0.1	0.15	-9.17	1	1	1	1	1	1	1	0.000694005
Phosphorylcholine	C5 H14 N O4 P	2.88338e+07	7.10847e+06	2.17803e+06	1.16584e+06	3.10641e+07	3.43745e+07	3.08737e+07	3.11197e+07	2.01796e+07	2.02	3.73	4.63	-0.11	-0.25	-0.1	-0.11	0.51	0.00339371	0.000502625	0.000195659	1	0.999464	1	0.999956	0.772746
		3.38511e+06	1.7623e+06	1.38953e+06	1.75401e+06	2.23893e+06	1.92572e+06	2.23948e+06	3.06467e+06	2.67868e+06	0.94	1.28	0.95	0.6	0.81	0.6	0.14	0.34	0.959528	0.924121	0.957904	0.99981	0.998788	1	0.999975	0.9979
L-α-lysophosphatidylcholine	C22 H46 N O7 P	1.8438e+07	4.00565e+06	2.19536e+06	1.1647e+06	3.01153e+07	2.68943e+07	1.8209e+07	2.08471e+07	1.40819e+07	2.2	3.07	3.98	-0.71	-0.54	0.02	-0.18	0.39	0.00109339	0.000189737	7.43188e-05	0.481442	0.530746	0.999994	0.999983	0.821006
	C41 H70 O4	6.19128e+06	2.11441e+06	1.47718e+06	957781	1.61283e+06	1.44994e+06	1.62431e+06	1.08594e+07	5.28482e+06	1.55	2.07	2.69	1.94	2.09	1.93	-0.81	0.23	0.0506021	0.00912061	0.00211949	0.0298867	0.0303872	0.0119179	0.0720979	0.977439
		4.91567e+06	1.07924e+06	548590	159419	3.42778e+06	6.41411e+06	6.89582e+06	5.49306e+06	3.3921e+06	2.19	3.16	4.95	0.52	-0.38	-0.49	-0.16	0.54	0.134514	0.0854502	0.0456205	0.998225	0.92913	0.989892	0.982718	0.999942
	C89 H163 N4 O13 P3	1.35816e+07	257600	143703	169592	6.34968e+06	6.60791e+06	4.73337e+06	2.33534e+07	7.30065e+06	5.72	6.56	6.32	1.1	1.04	1.52	-0.78	0.9	0.0215528	0.0153888	0.0154276	0.396116	0.650717	0.768166	0.0347249	0.814268
Octadecyl 3-(3,5-di-tert-butyl-4-hydroxyphenyl)propionate	C35 H62 O3	1.44549e+07	1.92806e+07	1.94949e+07	1.85156e+07	1.16116e+07	1.06002e+07	7.82929e+06	1.06044e+07	2.95692e+06	-0.42	-0.43	-0.36	0.32	0.45	0.88	0.45	2.29	0.45085	0.98898	0.862878	0.0831419	0.067011	0.0108727	0.2696	2.06429e-07
[Similar to: 6-formyl-10-(hydroxymethyl)-5-methoxy-3-methylidene-2-oxo-2H,3H,3aH,4H,5H,8H,9H,11aH-cyclodeca[b]furan-4-yl 2-methylbutanoate; ΔMass: 305.3076 Da]	C46 H69 N P2	683409	691329	734843	687187	730514	732593	681071	739281	1.23731e+07	-0.02	-0.1	-0.01	-0.1	-0.1	0	-0.11	-4.18	1	1	1	1	1	1	1	6.78679e-07
	C37 H75 N5 O6 P2	1.37466e+07	1.5674e+06	1.06611e+06	585192	5.46385e+06	5.04582e+06	1.02044e+07	1.97622e+07	8.56786e+06	3.13	3.69	4.55	1.33	1.45	0.43	-0.52	0.68	0.114831	0.0503075	0.0364635	0.611194	0.733424	0.990584	0.428656	0.996661
PC(o-22:2(13Z,16Z)/22:3(10Z,13Z,16Z))	C52 H96 N O7 P	2.19962e+07	6.75007e+06	4.40155e+06	2.61287e+06	1.30785e+07	1.25877e+07	2.15034e+07	6.69967e+07	1.95722e+07	1.7	2.32	3.07	0.75	0.81	0.03	-1.61	0.17	0.459533	0.20331	0.160353	0.742932	0.793067	0.999589	0.00182312	0.999998
	C34 H65 N O2	4.71476e+07	1.81545e+07	1.01549e+07	2.69062e+06	5.58019e+07	7.26852e+07	7.53899e+07	4.23636e+07	3.33635e+07	1.38	2.22	4.13	-0.24	-0.62	-0.68	0.15	0.5	0.40302	0.108639	0.0289216	0.979595	0.48011	0.536535	1	0.99998
[Similar to: (4aR,5R,6aS,6bR,8aR,10S,12aR,14bS)-10-{[(2R,3R,4R,5S,6R)-3-acetamido-4,5-dihydroxy-6-(hydroxymethyl)oxan-2-yl]oxy}-5-hydroxy-2,2,6a,6b,9,9,12a-heptamethyl-1,2,3,4,4a,5,6,6a,6b,7,8,8a,9,10,11,12,12a,12b,13,14b-icosahydropicene-4a-carboxylic acid; ΔMass: 36.9793 Da]	C40 H62 N2 O5 P2	190077	52089.5	24278.1	20711.9	97835.7	64991.9	61218.8	196678	1.99551e+07	1.87	2.97	3.2	0.96	1.55	1.63	-0.05	-6.71	1	1	1	1	1	1	1	8.11012e-06
1-Stearoyl-2-hydroxy-sn-glycero-3-PE	C23 H48 N O7 P	1.72975e+07	3.16023e+06	1.54127e+06	935189	2.94841e+07	2.65655e+07	1.55386e+07	1.93932e+07	8.77916e+06	2.45	3.49	4.21	-0.77	-0.62	0.15	-0.16	0.98	0.0490966	0.0197591	0.0125387	0.834023	0.700947	0.999998	0.999999	0.868789
1-(11Z)-octadecenoyl-2-(13Z,16Z)-docosadienoyl-sn-glycero-3-phosphoethanolamine	C45 H84 N O8 P	3.26324e+07	8.70233e+06	3.77451e+06	2.52768e+06	2.40684e+07	2.54453e+07	2.92054e+07	6.39159e+07	2.50377e+07	1.91	3.11	3.69	0.44	0.36	0.16	-0.97	0.38	0.0761137	0.0223528	0.0125411	0.753986	0.847681	0.916955	0.274187	0.999372
Decanoylcarnitine	C17 H33 N O4	1.18467e+07	1.85066e+06	1.15527e+06	497502	1.34248e+07	1.53047e+07	1.38556e+07	1.08756e+07	5.83397e+06	2.68	3.36	4.57	-0.18	-0.37	-0.23	0.12	1.02	0.420759	0.270341	0.200434	0.999835	0.999728	1	1	0.999746
1-[(8Z,11Z,14Z)-icosatrienoyl]-sn-glycero-3-phosphocholine	C28 H52 N O7 P	2.74029e+07	5.11076e+06	2.21719e+06	1.35103e+06	3.96426e+07	3.56155e+07	2.21109e+07	2.32199e+07	1.35279e+07	2.42	3.63	4.34	-0.53	-0.38	0.31	0.24	1.02	0.0379414	0.0117509	0.00680155	0.241181	0.450999	1	0.999974	0.825331
		1.47059e+07	5.96271e+06	3.97632e+06	5.03768e+06	8.33137e+06	7.5115e+06	8.38456e+06	1.21737e+07	1.30764e+07	1.3	1.89	1.55	0.82	0.97	0.81	0.27	0.17	0.661585	0.481897	0.574595	1	0.999984	0.999278	1	1
		6.16149e+06	4.25075e+06	4.25396e+06	3.99793e+06	4.38141e+06	4.56828e+06	4.44436e+06	6.37957e+06	6.65034e+06	0.54	0.53	0.62	0.49	0.43	0.47	-0.05	-0.11	0.993508	0.994625	0.993474	0.999565	0.899288	1	1	1
[Similar to: Acetyl fentanyl 4-methylphenethyl analogue; ΔMass: 333.2403 Da]	C41 H59 N5 O3	569823	574565	538519	580461	576050	580104	511650	557464	1.30152e+07	-0.01	0.08	-0.03	-0.02	-0.03	0.16	0.03	-4.51	1	1	1	1	1	1	1	5.20422e-07
[Similar to: Tetranor-12(S)-HETE; ΔMass: 429.2870 Da]	C42 H65 N O7	22278	19630.6	18688.1	20402.7	20735.1	21144.8	20558.7	21317	1.25932e+07	0.18	0.25	0.13	0.1	0.08	0.12	0.06	-9.14	1	1	1	1	1	1	1	3.59375e-07
	C49 H100 N2 O P2 S	9.20628e+06	3.60024e+06	2.81046e+06	2.99768e+06	4.91819e+06	4.54679e+06	5.10088e+06	8.178e+06	7.56556e+06	1.35	1.71	1.62	0.9	1.02	0.85	0.17	0.28	0.946389	0.880867	0.915245	0.999995	0.999316	1	1	1
		1.45991e+07	556169	182370	121840	1.21684e+07	1.09076e+07	1.06764e+07	3.47545e+07	8.64374e+06	4.71	6.32	6.9	0.26	0.42	0.45	-1.25	0.76	0.341169	0.257274	0.253967	0.993499	0.999722	1	0.208387	0.999999
		1.12291e+07	2.94052e+06	2.09317e+06	2.11253e+06	5.6144e+06	4.72529e+06	5.05765e+06	7.34289e+06	1.1026e+07	1.93	2.42	2.41	1	1.25	1.15	0.61	0.03	0.91892	0.839918	0.847659	1	0.989854	0.999469	0.999999	0.999954
C18-Carnitine	C25 H49 N O4	3.8189e+06	730103	328073	187045	5.97991e+06	5.35988e+06	4.06004e+07	3.52791e+06	2.18963e+06	2.39	3.54	4.35	-0.65	-0.49	-3.41	0.11	0.8	0.92079	0.843584	0.812162	0.926055	0.977856	8.25229e-13	1	0.999221
		8.94774e+06	2.6488e+06	1.99945e+06	2.22792e+06	5.18906e+06	3.3853e+06	4.12961e+06	7.75792e+06	7.82813e+06	1.76	2.16	2.01	0.79	1.4	1.12	0.21	0.19	0.962234	0.903601	0.948304	0.999998	1	1	1	0.999991
		1.38174e+07	5.56623e+06	3.35763e+06	4.53963e+06	9.83088e+06	8.37033e+06	8.80052e+06	1.07336e+07	1.35916e+07	1.31	2.04	1.61	0.49	0.72	0.65	0.36	0.02	0.679736	0.515764	0.563477	1	0.999988	0.999247	1	0.999999
Linoleyl carnitine	C25 H45 N O4	6.33699e+06	1.05784e+06	473625	282990	9.63127e+06	9.64096e+06	3.51015e+07	5.34708e+06	3.68273e+06	2.58	3.74	4.48	-0.6	-0.61	-2.47	0.25	0.78	0.558211	0.409465	0.356548	0.737549	0.791692	6.52955e-12	0.999998	0.984566
SM(d18:0/18:0)	C41 H85 N2 O6 P	2.42728e+07	4.26828e+06	2.37635e+06	1.04339e+06	2.36623e+07	2.81363e+07	2.94257e+07	2.44175e+07	1.7154e+07	2.51	3.35	4.54	0.04	-0.21	-0.28	-0.01	0.5	0.130433	0.0621937	0.0393364	0.999996	0.999981	0.99313	0.999712	0.991356
[Similar to: Palmitoyl sphingomyelin; ΔMass: 119.0620 Da]	C42 H89 N5 O6 P2	5.50179e+07	1.31775e+07	6.2786e+06	3.68635e+06	2.68528e+07	3.12209e+07	3.1437e+07	1.07282e+08	3.5676e+07	2.06	3.13	3.9	1.03	0.82	0.81	-0.96	0.62	0.0311226	0.00702827	0.00355395	0.186228	0.408952	0.479716	0.0254885	0.981367
	C37 H62 O6	2.04457e+07	2.09046e+07	1.66667e+07	1.69366e+07	1.39421e+07	1.32589e+07	1.07483e+07	1.57269e+07	3.24751e+06	-0.03	0.29	0.27	0.55	0.62	0.93	0.38	2.65	0.999875	0.793409	0.848376	0.010202	0.0153896	0.00231509	0.588244	1.81468e-09
	C42 H77 N O2	1.7707e+06	410369	119633	59755.5	1.17369e+06	1.11603e+06	1.06264e+07	3.66222e+06	1.3495e+06	2.11	3.89	4.89	0.59	0.67	-2.59	-1.05	0.39	0.999424	0.998326	0.997972	0.999993	0.999997	1.81454e-05	0.988504	1
		6.90479e+06	5.4296e+06	4.91403e+06	3.86833e+06	3.6297e+06	6.04989e+06	6.50233e+06	8.29407e+06	8.45918e+06	0.35	0.49	0.84	0.93	0.19	0.09	-0.26	-0.29	0.925339	0.882395	0.891247	1	0.999999	1	1	1
[Similar to: Palmitoyl sphingomyelin; ΔMass: 42.0475 Da]	C42 H85 N2 O6 P	2.62192e+07	6.01299e+06	3.39545e+06	1.66684e+06	3.08265e+07	3.80758e+07	3.15199e+07	3.46702e+07	2.20998e+07	2.12	2.95	3.98	-0.23	-0.54	-0.27	-0.4	0.25	0.0775809	0.0358426	0.0234225	0.99983	1	0.999357	0.998554	0.997556
		8.46351e+06	3.09453e+06	1.23585e+06	2.34037e+06	4.57637e+06	3.82598e+06	3.90275e+06	5.43232e+06	5.33097e+06	1.45	2.78	1.85	0.89	1.15	1.12	0.64	0.67	0.939133	0.819308	0.875546	0.999068	0.978036	0.999975	0.999946	0.999987
[Similar to: Oleoyl ethylamide; ΔMass: 115.0996 Da]	C26 H52 N2 O2	1.9662e+06	788876	859738	741631	501788	708614	282337	381067	1.44421e+06	1.32	1.19	1.41	1.97	1.47	2.8	2.37	0.45	0.900487	0.999999	1	0.999992	1	0.999857	0.999822	0.996955
N-[(9Z)-3-hydroxyhexadec-9-enoyl]sphingosine-1-phosphocholine	C39 H77 N2 O7 P	1.56896e+07	2.27736e+06	1.14836e+06	606158	2.22003e+07	2.37456e+07	1.79952e+07	2.34935e+07	9.28037e+06	2.78	3.77	4.69	-0.5	-0.6	-0.2	-0.58	0.76	0.034152	0.0159828	0.0112749	1	0.999492	0.999609	0.999914	0.97356
cis-5-Tetradecenoylcarnitine	C21 H39 N O4	6.38641e+06	1.14871e+06	867618	298058	9.2289e+06	1.01741e+07	8.44888e+06	7.37174e+06	5.51961e+06	2.47	2.88	4.42	-0.53	-0.67	-0.4	-0.21	0.21	0.539838	0.367355	0.292334	0.843321	0.833315	0.999553	1	0.997787
LysoPC(20:5(5Z,8Z,11Z,14Z,17Z))	C28 H48 N O7 P	1.22888e+07	2.7742e+06	1.38766e+06	784351	1.96884e+07	1.97068e+07	1.24427e+07	1.32049e+07	7.73563e+06	2.15	3.15	3.97	-0.68	-0.68	-0.02	-0.1	0.67	0.173148	0.0690162	0.0457064	0.599765	0.937137	1	0.999994	0.983001
	C56 H100 N2 O2 S2	1.75759e+07	6.14149e+06	4.92241e+06	5.36346e+06	4.08542e+06	8.49944e+06	7.64428e+06	1.44248e+07	1.32575e+07	1.52	1.84	1.71	2.11	1.05	1.2	0.29	0.41	0.744783	0.524953	0.649892	0.8317	1	0.995961	1	0.999971
Bupivacaine	C18 H28 N2 O	935446	84077.7	59885.2	32221.1	628704	1.75037e+06	285205	760895	202115	3.48	3.97	4.86	0.57	-0.9	1.71	0.3	2.21	0.999996	0.999988	0.999985	1	0.678211	0.907851	1	0.999995
[Similar to: 8-Isoprostaglandin F1β; ΔMass: 333.3541 Da]	C47 H79 N O2	5.28284e+06	1.55856e+06	1.00844e+06	1.13931e+06	943270	1.04788e+06	2.83205e+06	8.0415e+06	1.09697e+07	1.76	2.39	2.21	2.49	2.33	0.9	-0.61	-1.05	0.948299	0.689581	0.709793	0.709461	0.749406	0.99684	0.834577	0.11241
3-Formyl-6,6,7b-trimethyl-2,4,4a,5,6,7,7a,7b-octahydro-1H-cyclobuta[e]inden-2-yl 3-chloro-6-hydroxy-4-methoxy-2-methylbenzoate	C24 H29 Cl O5	27732.9	8213.94	7570.07	8504.87	55961.8	47094.5	32930.9	28483.3	1.14062e+07	1.76	1.87	1.71	-1.01	-0.76	-0.25	-0.04	-8.68	1	1	1	1	1	1	1	2.55288e-05
		3.74439e+07	3.31238e+06	2.88123e+06	2.47671e+06	1.97779e+07	1.66914e+07	1.81038e+07	5.09669e+07	2.32131e+07	3.5	3.7	3.92	0.92	1.17	1.05	-0.44	0.69	0.00195273	0.000386974	0.00028237	0.288716	0.310043	0.492597	0.0424371	0.951149
		7.60685e+06	1.56076e+06	1.18106e+06	1.00087e+06	2.93517e+06	2.41036e+06	5.82421e+06	9.37694e+06	9.49889e+06	2.29	2.69	2.93	1.37	1.66	0.39	-0.3	-0.32	0.945821	0.817578	0.823534	1	0.999999	0.999989	0.995635	0.957108
1-O-(1Z-Tetradecenyl)-2-(9Z-octadecenoyl)-sn-glycerol	C35 H66 O4	7.43782e+06	2.07538e+06	1.636e+06	1.60083e+06	3.46653e+06	3.04902e+06	2.88206e+06	5.89482e+06	5.36849e+06	1.84	2.18	2.22	1.1	1.29	1.37	0.34	0.47	0.955304	0.906847	0.920707	1	0.998439	0.999999	1	0.999981
	C51 H101 N4 O5 P	1.16517e+07	4.29485e+06	2.7579e+06	3.15438e+06	7.60766e+06	6.23547e+06	7.37128e+06	8.36224e+06	1.14792e+07	1.44	2.08	1.89	0.62	0.9	0.66	0.48	0.02	0.860844	0.771879	0.80122	0.999999	0.994782	0.999829	1	1
	C59 H101 N O6	8.30148e+06	1.93209e+06	1.95228e+06	1.26273e+06	3.17791e+06	3.53006e+06	5.51654e+06	9.52108e+06	1.17296e+07	2.1	2.09	2.72	1.39	1.23	0.59	-0.2	-0.5	0.870595	0.653307	0.628604	0.999487	1	1	0.997946	0.885688
	C24 H47 N10 O3 P	124127	50374.9	31964.7	39822.7	183907	168885	108475	62958.4	1.36847e+07	1.3	1.96	1.64	-0.57	-0.44	0.19	0.98	-6.78	1	1	1	1	1	1	1	4.19166e-07
[Similar to: DL-Dipalmitoylphosphatidylcholine; ΔMass: 759.5803 Da]	C82 H157 N8 O11 P S	2.21693e+07	704900	196930	139789	9.99586e+06	1.15187e+07	1.56236e+07	2.32448e+07	1.3064e+07	4.97	6.81	7.31	1.15	0.94	0.5	-0.07	0.76	0.0452856	0.0336475	0.0328302	0.786244	0.951154	0.999997	0.906813	0.990919
[Similar to: Palmitoyl sphingomyelin; ΔMass: 129.0099 Da]	C42 H83 N5 O7 P2	3.57018e+07	1.28869e+07	6.33651e+06	4.41556e+06	4.31009e+07	3.64236e+07	3.85061e+07	1.19723e+08	5.14901e+07	1.47	2.49	3.02	-0.27	-0.03	-0.11	-1.75	-0.53	0.587962	0.330055	0.254974	0.995816	0.996668	1	0.212982	1
1-(1Z-octadecenyl)-2-(9Z-octadecenoyl)-sn-glycero-3-phosphoethanolamine	C41 H80 N O7 P	3.53356e+06	509882	301441	102126	1.1442e+06	1.21491e+06	1.02374e+07	5.02485e+06	1.80857e+06	2.79	3.55	5.11	1.63	1.54	-1.53	-0.51	0.97	0.968433	0.93907	0.918762	0.995045	0.996685	0.000151796	0.992995	1
Desmethylcitalopram	C19 H19 F N2 O	13343.8	11035.7	7205.71	9328.88	9952.4	12461.2	10335.4	9183.92	57375	0.27	0.89	0.52	0.42	0.1	0.37	0.54	-2.1	0.999932	0.999628	0.999488	0.995855	0.999902	0.999995	1	0.999996
3-β-D-glucosylstigmasterol	C35 H58 O6	1.85193e+07	1.64421e+07	1.14046e+07	1.1506e+07	9.19817e+06	1.02393e+07	8.74596e+06	1.5376e+07	2.36647e+06	0.17	0.7	0.69	1.01	0.85	1.08	0.27	2.97	0.919956	0.0537571	0.102233	0.00163055	0.00224072	0.000669638	0.867652	3.19877e-10
	C47 H76 N O P3	4.50165e+06	580093	403214	272665	2.72523e+06	3.15537e+06	1.02132e+07	1.05879e+07	4.04366e+06	2.96	3.48	4.05	0.72	0.51	-1.18	-1.23	0.15	0.628837	0.442729	0.393489	0.924521	0.953961	0.102828	0.947875	0.997504
		8.54587e+06	5.25203e+06	5.08614e+06	4.82515e+06	5.89256e+06	5.8965e+06	5.73732e+06	7.45501e+06	8.34957e+06	0.7	0.75	0.82	0.54	0.54	0.57	0.2	0.03	0.995182	0.991349	0.992114	0.99916	0.914467	1	1	1
[Similar to: Palmitoyl sphingomyelin; ΔMass: 124.1251 Da]	C51 H86 N8 O	3.87667e+07	8.45693e+06	5.86971e+06	3.91059e+06	2.80184e+07	2.60888e+07	3.63022e+07	7.53063e+07	3.16616e+07	2.2	2.72	3.31	0.47	0.57	0.09	-0.96	0.29	0.0870038	0.0376835	0.0231337	0.602814	0.771081	0.988804	0.448702	1
		1.33156e+07	5.2274e+06	4.04396e+06	5.07787e+06	8.34671e+06	7.72864e+06	7.96277e+06	1.23556e+07	1.31797e+07	1.35	1.72	1.39	0.67	0.78	0.74	0.11	0.01	0.688556	0.628087	0.714506	1	0.999723	0.998846	1	1
		4.21099e+06	1.00247e+06	835658	999971	1.39298e+06	1.55143e+06	1.49333e+06	3.4726e+06	5.0073e+06	2.07	2.33	2.07	1.6	1.44	1.5	0.28	-0.25	0.999894	0.999361	0.999568	0.980611	0.900715	1	0.999999	0.999429
		4.41578e+06	1.26015e+06	1.26036e+06	1.98904e+06	2.89526e+06	2.01592e+06	2.25396e+06	2.90623e+06	2.88691e+06	1.81	1.81	1.15	0.61	1.13	0.97	0.6	0.61	0.976563	0.960938	0.987424	0.985787	0.937586	1	0.999986	0.999997
		1.59616e+07	357269	149755	101279	2.17615e+07	2.55559e+07	1.59608e+07	1.80262e+07	1.00935e+07	5.48	6.74	7.3	-0.45	-0.68	0	-0.18	0.66	0.0516523	0.0464491	0.045208	0.999134	0.880741	1	1	0.848232
(2R)-2-[(8Z,11Z,14Z)-8,11,14-Icosatrienoyloxy]-3-(pentadecanoyloxy)propyl 2-(trimethylammonio)ethyl phosphate	C43 H80 N O8 P	1.20176e+07	2.98178e+06	1.65948e+06	1.21344e+06	1.51555e+07	8.93641e+06	1.21753e+07	2.99615e+07	1.35133e+07	2.01	2.86	3.31	-0.33	0.43	-0.02	-1.32	-0.17	0.372339	0.182439	0.134612	0.9886	0.994661	0.997093	0.700104	1
	C30 H68 N6 O2 S	1.67158e+06	647778	526938	568937	907907	736036	745909	1.62434e+06	1.52141e+06	1.37	1.67	1.55	0.88	1.18	1.16	0.04	0.14	0.99982	0.999488	0.999683	0.988262	0.837053	1	1	0.999997
	C26 H47 Cl N2 O5	9579.02	14237	15491.4	18551.9	9404.06	9818.94	9437.18	8871.96	1.02866e+07	-0.57	-0.69	-0.95	0.03	-0.04	0.02	0.11	-10.07	1	1	1	1	1	1	1	3.06282e-06
	C43 H85 N O6	1.79436e+06	1.58076e+06	1.88852e+06	1.68118e+06	1.3835e+06	2.68281e+06	1.60764e+06	1.78973e+06	1.76392e+06	0.18	-0.07	0.09	0.38	-0.58	0.16	0	0.02	0.999972	0.999998	0.999999	0.999998	0.311577	0.999999	1	1
	C49 H96 N2 O8	3.00313e+06	1.06825e+06	1.00016e+06	993300	1.42582e+06	1.35683e+06	1.39623e+06	2.56553e+06	2.2931e+06	1.49	1.59	1.6	1.07	1.15	1.1	0.23	0.39	0.974565	0.958475	0.962423	0.999913	0.985739	1	1	1
	C15 H27 N O5	427339	137656	129159	56181.3	570591	425938	470795	301724	9.13195e+06	1.63	1.73	2.93	-0.42	0	-0.14	0.5	-4.42	1	1	1	1	1	1	1	2.43258e-06
[Similar to: Palmitoyl sphingomyelin; ΔMass: 93.0093 Da]	C40 H79 N9 O3 P2	2.94754e+07	5.32739e+06	3.83152e+06	2.49617e+06	1.93554e+07	2.19406e+07	2.99988e+07	6.21941e+07	1.98219e+07	2.47	2.94	3.56	0.61	0.43	-0.03	-1.08	0.57	0.246101	0.144118	0.0937074	0.946802	0.979771	0.935408	0.281291	0.990575
	C54 H101 O2 P3	7.10678e+06	1.93177e+06	1.49295e+06	1.57762e+06	3.89325e+06	1.59608e+06	3.94549e+06	6.10194e+06	7.67046e+06	1.88	2.25	2.17	0.87	2.15	0.85	0.22	-0.11	0.455212	0.298916	0.289935	0.935776	0.661699	0.998714	0.999737	0.990665
		8.78811e+06	244026	144458	116583	4.05043e+06	3.07087e+06	8.77554e+06	4.43268e+07	5.39439e+06	5.17	5.93	6.24	1.12	1.52	0	-2.33	0.7	0.367144	0.353999	0.350642	0.747971	0.822452	0.929852	0.0390157	0.99962
	C45 H94 N4 O9 S	3.93674e+06	1.15561e+06	776078	941781	1.97175e+06	1.579e+06	1.7888e+06	2.44424e+06	2.2496e+06	1.77	2.34	2.06	1	1.32	1.14	0.69	0.81	0.952092	0.894524	0.923134	0.998804	0.967593	0.999997	0.999988	0.999995
	C58 H113 O2 P3	1.68967e+06	480958	280872	337214	741924	601410	565429	1.69635e+06	1.32783e+06	1.81	2.59	2.33	1.19	1.49	1.58	-0.01	0.35	0.996474	0.993095	0.99604	0.989443	0.878362	1	1	1
[Similar to: Palmitoyl sphingomyelin; ΔMass: 113.0720 Da]	C49 H81 N7 O3	1.85886e+07	4.40344e+06	2.82409e+06	2.7398e+06	8.27209e+06	7.53051e+06	1.05538e+07	2.56536e+07	1.10442e+07	2.08	2.72	2.76	1.17	1.3	0.82	-0.46	0.75	0.0390293	0.0144991	0.00712288	0.292235	0.390578	0.999032	0.0130208	0.997031
[Similar to: Palmitoyl sphingomyelin; ΔMass: 71.0603 Da]	C46 H83 N3 O6	1.16342e+07	2.44845e+06	1.3865e+06	473406	4.26939e+06	5.0571e+06	1.55186e+07	2.05708e+07	7.9131e+06	2.25	3.07	4.62	1.45	1.2	-0.42	-0.82	0.56	0.330218	0.200475	0.147968	0.706859	0.840967	0.450979	0.322142	0.99999
(3aS,3bS,5aR,7S,9aS,9bS,11aS)-2-Amino-7-hydroxy-9a,11a-dimethyl-3,3a,3b,4,5,5a,6,7,8,9,9a,9b,11,11a-tetradecahydro-10H-naphtho[2,1-e]indol-10-one	C18 H28 N2 O2	271082	63160.7	37125.9	33682.2	435884	468758	810159	333523	291644	2.1	2.87	3.01	-0.69	-0.79	-1.58	-0.3	-0.11	0.985843	0.965302	0.95834	0.973521	0.998481	0.999999	1	0.999594
	C42 H67 N O7	117940	108618	111183	107043	102868	286184	98753.5	117162	5.58901e+06	0.12	0.09	0.14	0.2	-1.28	0.26	0.01	-5.57	1	1	1	1	1	1	1	2.5978e-06
PC(18:3(9Z,12Z,15Z)/18:2(9Z,12Z))	C44 H78 N O8 P	1.36928e+07	2.87565e+06	1.50561e+06	1.13495e+06	8.97412e+06	8.39875e+06	7.49564e+06	1.73711e+07	9.85077e+06	2.25	3.18	3.59	0.61	0.71	0.87	-0.34	0.48	0.0274395	0.00663978	0.00337921	0.811267	0.965534	0.939393	0.299642	0.995153
		8.3703e+06	2.2749e+06	1.44447e+06	1.28207e+06	1.3751e+06	2.73673e+06	4.24597e+06	1.1181e+07	8.61672e+06	1.88	2.53	2.71	2.61	1.61	0.98	-0.42	-0.04	0.999156	0.997896	0.997356	0.988792	0.964	1	1	0.999999
	C47 H84 N6 O4	1.83861e+06	638222	548929	571443	912034	815723	962060	1.72906e+06	1.52615e+06	1.53	1.74	1.69	1.01	1.17	0.93	0.09	0.27	0.996729	0.992856	0.994362	0.995696	0.826465	1	1	1
(2E)-hexadecenoylcarnitine	C23 H43 N O4	3.75811e+06	783612	334018	240553	5.54405e+06	5.21063e+06	6.70607e+06	2.93363e+06	2.63136e+06	2.26	3.49	3.97	-0.56	-0.47	-0.84	0.36	0.51	0.675645	0.499073	0.434692	0.670256	0.827265	0.532	0.999997	0.993177
PC(P-16:0/16:0)	C40 H80 N O7 P	1.15008e+07	3.08617e+06	1.98375e+06	954664	1.24277e+07	1.07091e+07	1.70954e+07	2.24537e+07	9.37765e+06	1.9	2.54	3.59	-0.11	0.1	-0.57	-0.97	0.29	0.0337161	0.0128881	0.00648149	0.982064	0.999018	0.999939	0.871384	0.999264
C23-Ceramide	C41 H81 N O3	3.07769e+06	939917	395376	380892	1.39154e+06	1.53442e+06	3.6131e+06	6.58259e+06	2.69679e+06	1.71	2.96	3.01	1.15	1	-0.23	-1.1	0.19	0.498937	0.282048	0.267582	0.827298	0.857096	0.9973	0.0135398	0.999987
	C38 H58 N6 O9	102156	21443.6	15843.1	7976.94	78481.5	71585.9	32540.4	138403	3.52346e+06	2.25	2.69	3.68	0.38	0.51	1.65	-0.44	-5.11	1	1	1	1	1	1	1	0.000450412
[Similar to: Palmitoyl sphingomyelin; ΔMass: 79.0474 Da]		1.40008e+07	1.59257e+06	774908	290077	9.72888e+06	1.27578e+07	1.07683e+07	2.04251e+07	9.74173e+06	3.14	4.18	5.59	0.53	0.13	0.38	-0.54	0.52	0.0620986	0.035441	0.0286389	0.936063	0.995765	0.996844	0.956576	0.995965
	C38 H75 N O6	1.01073e+07	1.43543e+06	1.73667e+06	396110	7.64158e+06	7.10659e+06	5.3177e+06	9.05419e+06	3.31096e+06	2.82	2.54	4.67	0.4	0.51	0.93	0.16	1.61	0.43798	0.249256	0.163904	1	1	0.943178	0.996099	0.751537
	C54 H96 N6 O4	3.23899e+06	953121	623223	741177	1.70306e+06	1.25228e+06	1.48412e+06	2.51323e+06	2.73559e+06	1.76	2.38	2.13	0.93	1.37	1.13	0.37	0.24	0.942183	0.886432	0.91327	0.999974	0.980144	0.999994	1	1
		8.45162e+06	2.4501e+06	1.99838e+06	2.72831e+06	4.58495e+06	3.81729e+06	3.88529e+06	5.42466e+06	5.34163e+06	1.79	2.08	1.63	0.88	1.15	1.12	0.64	0.66	0.919848	0.852235	0.883117	0.998887	0.976821	0.999986	0.999997	0.999988
[Similar to: Palmitoyl sphingomyelin; ΔMass: 45.0454 Da]	C44 H81 N3 O6	1.18247e+07	2.77294e+06	1.11043e+06	662357	5.00494e+06	5.25955e+06	1.77751e+07	1.46847e+07	8.13028e+06	2.09	3.41	4.16	1.24	1.17	-0.59	-0.31	0.54	0.421099	0.276205	0.213212	0.901523	0.950444	0.0222666	0.869831	0.999947
[Similar to: Nervonic ceramide; ΔMass: -30.0109 Da]	C41 H79 N O2	3.02867e+06	834096	353792	325582	1.30894e+06	1.56228e+06	3.54381e+06	6.25668e+06	2.64526e+06	1.86	3.1	3.22	1.21	0.96	-0.23	-1.05	0.2	0.458375	0.271962	0.258631	0.844984	0.874428	0.991253	0.0198122	0.999965
	C30 H69 N9 O9	2.94351e+06	514200	486778	430999	1.83775e+06	2.53195e+06	5.16004e+06	8.88472e+06	3.15828e+06	2.52	2.6	2.77	0.68	0.22	-0.81	-1.59	-0.1	0.258147	0.153055	0.14388	0.81209	0.883978	0.995122	0.731436	1
Cholesteryl arachidonate	C47 H76 O2	841945	278003	129226	70421.2	152450	259829	560184	1.11101e+06	1.44542e+06	1.6	2.7	3.58	2.47	1.7	0.59	-0.4	-0.78	0.856485	0.504937	0.582742	0.583905	0.676399	0.955679	0.951168	0.145163
		1.51775e+06	515264	596178	674577	964154	843230	1.32906e+06	1.42775e+06	1.2691e+06	1.56	1.35	1.17	0.65	0.85	0.19	0.09	0.26	0.999591	0.998994	0.999239	0.992291	0.824305	1	1	0.999982
β-D-galactosyl-(1->4)-β-D-glucosyl-(1<->1)-N-[(15Z)-tetracosenoyl]sphingosine	C54 H101 N O13	2.95159e+06	353624	197613	105003	673384	847828	2.05717e+06	3.43578e+06	1.64788e+06	3.06	3.9	4.81	2.13	1.8	0.52	-0.22	0.84	0.636417	0.569697	0.469878	0.860657	0.904953	0.978819	0.932415	0.999998
[Similar to: Palmitoyl sphingomyelin; ΔMass: 115.0295 Da]	C36 H86 N9 O5 P3	8.88226e+06	2.05469e+06	1.45905e+06	721594	6.93584e+06	5.71543e+06	6.60686e+06	1.50985e+07	7.33522e+06	2.11	2.61	3.62	0.36	0.64	0.43	-0.77	0.28	0.0161466	0.00199102	0.000792918	0.491085	0.646375	0.464413	0.0791166	0.837955
[Similar to: Palmitoyl sphingomyelin; ΔMass: 119.0245 Da]	C49 H79 N3 O7	1.60098e+07	2.57066e+06	1.13747e+06	905533	7.63345e+06	8.91509e+06	8.28999e+06	2.11601e+07	9.29748e+06	2.64	3.82	4.14	1.07	0.84	0.95	-0.4	0.78	0.0402	0.00975738	0.00622936	0.490861	0.58417	0.767522	0.134233	0.964075
	C17 H24 N2 O S	10261.6	9451.62	9185.84	9228.16	10047.6	9967.55	9998.08	9509.62	5.49996e+06	0.12	0.16	0.15	0.03	0.04	0.04	0.11	-9.07	1	1	1	1	1	1	1	1.41255e-06
	C56 H112 N5 O5 P	2.36523e+06	471643	582231	448696	864343	1.39689e+06	1.65548e+06	2.62292e+06	2.20215e+06	2.33	2.02	2.4	1.45	0.76	0.51	-0.15	0.1	0.919982	0.871286	0.877649	0.999806	0.999579	1	0.999998	1
[Similar to: Palmitoyl sphingomyelin; ΔMass: 89.0145 Da]	C40 H83 N5 O6 P2	1.08059e+07	2.21091e+06	1.22281e+06	1.02124e+06	7.30916e+06	7.48604e+06	9.76958e+06	2.64596e+07	9.2921e+06	2.29	3.14	3.4	0.56	0.53	0.15	-1.29	0.22	0.0183577	0.00378474	0.00271375	0.391816	0.505561	0.672657	0.126726	0.951927
		1.1582e+07	4.61252e+06	4.36235e+06	3.98871e+06	7.09594e+06	4.35904e+06	7.31174e+06	9.48807e+06	8.68907e+06	1.33	1.41	1.54	0.71	1.41	0.66	0.29	0.41	0.690241	0.567414	0.574262	0.999994	0.959052	0.999928	0.999999	0.99914
[Similar to: 2-{4-[(1S,3aR,4R,6aR)-4-(3,4-dimethoxyphenyl)-hexahydrofuro[3,4-c]furan-1-yl]-2-methoxyphenoxy}-6-(hydroxymethyl)oxane-3,4,5-triol; ΔMass: -25.7128 Da]	C32 H64 N2 O2	702378	882476	705814	653648	726600	689001	818604	649247	3.22778e+06	-0.33	-0.01	0.1	-0.05	0.03	-0.22	0.11	-2.2	1	0.999998	0.999994	0.999738	0.99973	1	0.998926	0.0281417
	C35 H54 O S3	63305.8	31423.5	32972.6	24276.1	79039.6	107937	60608.2	84184.2	5.12563e+06	1.01	0.94	1.38	-0.32	-0.77	0.06	-0.41	-6.34	1	1	1	1	1	1	1	8.44932e-08
		1.51711e+06	104491	107583	129091	127872	161969	245657	511428	653110	3.86	3.82	3.55	3.57	3.23	2.63	1.57	1.22	0.992032	0.990415	0.991495	0.993141	0.865889	1	0.999992	0.999999
[Similar to: NP-003749; ΔMass: 420.4894 Da]	C43 H94 N4 O7 P2	1.89763e+06	535023	430439	464784	839854	749940	847527	1.20677e+06	1.03298e+06	1.83	2.14	2.03	1.18	1.34	1.16	0.65	0.88	0.990423	0.98115	0.986377	0.98701	0.949437	1	0.999994	0.999999
	C34 H62 N6 O4	1.06062e+07	1.31332e+06	1.54694e+06	309586	6.94943e+06	6.2379e+06	3.93402e+06	7.42317e+06	3.39696e+06	3.01	2.78	5.1	0.61	0.77	1.43	0.51	1.64	0.465581	0.25653	0.17452	1	0.999997	0.909892	0.987518	0.9436
[Similar to: Palmitoyl sphingomyelin; ΔMass: 69.0454 Da]	C46 H81 N3 O6	1.07608e+07	2.76434e+06	2.31388e+06	1.0727e+06	7.87114e+06	7.74385e+06	1.49979e+07	2.5714e+07	8.02469e+06	1.96	2.22	3.33	0.45	0.47	-0.48	-1.26	0.42	0.188746	0.11407	0.0597798	0.767593	0.873598	0.832388	0.148071	0.999982
		1.0312e+07	1.79335e+06	1.29046e+06	881986	3.65408e+06	4.75464e+06	9.76744e+06	1.08141e+07	7.04063e+06	2.52	3	3.55	1.5	1.12	0.08	-0.07	0.55	0.102025	0.0552197	0.034742	0.587533	0.922416	0.866405	0.846337	0.999953
(2S,3R,4E)-2-(Dodecanoylamino)-3-hydroxy-4-octadecen-1-yl 2-(trimethylammonio)ethyl phosphate	C35 H71 N2 O6 P	7.9257e+06	1.62133e+06	824258	503920	1.18445e+07	1.16641e+07	8.30851e+06	8.84491e+06	4.48413e+06	2.29	3.27	3.98	-0.58	-0.56	-0.07	-0.16	0.82	0.125352	0.0541857	0.0365427	0.900263	0.854922	1	0.999995	0.941445
		4.82187e+06	1.14592e+06	819052	666007	2.59231e+06	1.61695e+06	3.66531e+06	4.98116e+06	5.51727e+06	2.07	2.56	2.86	0.9	1.58	0.4	-0.05	-0.19	0.816658	0.603951	0.615756	1	1	1	0.999532	0.999007
[Similar to: Palmitoyl sphingomyelin; ΔMass: 132.0306 Da]	C42 H87 N6 O4 P S2	2.67041e+07	6.90512e+06	3.091e+06	1.24286e+06	1.60971e+07	1.58204e+07	1.42518e+07	4.49233e+07	1.86682e+07	1.95	3.11	4.43	0.73	0.76	0.91	-0.75	0.52	0.0123242	0.00071958	0.000474741	0.440513	0.579482	0.217603	0.00994461	0.809468
	C25 H55 O10 P3	769751	787098	643060	751709	510313	696153	369520	670856	457797	-0.03	0.26	0.03	0.59	0.14	1.06	0.2	0.75	0.590577	0.999999	1	0.999764	0.999952	0.998923	0.999998	0.997415
[Similar to: Palmitoyl sphingomyelin; ΔMass: 50.9623 Da]	C44 H71 N3 O7	1.06676e+07	1.73823e+06	1.1969e+06	563422	7.99223e+06	9.19923e+06	8.70083e+06	1.67558e+07	7.59177e+06	2.62	3.16	4.24	0.42	0.21	0.29	-0.65	0.49	0.0411722	0.013655	0.00709191	0.962981	0.996977	0.999979	0.754127	0.996084
N-tetracosanoylsphinganine	C42 H85 N O3	1.482e+06	636033	522972	523018	853166	973895	4.68553e+06	2.87829e+06	1.61696e+06	1.22	1.5	1.5	0.8	0.61	-1.66	-0.96	-0.13	0.995234	0.981947	0.980577	0.999509	0.999866	6.72267e-05	0.783779	0.999672
	C42 H77 N O12	19457.6	17009.2	16543.2	17189.5	17296	18589.4	18230.3	16999.3	2.2604e+06	0.19	0.23	0.18	0.17	0.07	0.09	0.19	-6.86	1	1	1	1	1	1	1	0.00206166
	C56 H87 N O10	2.84622e+06	2.86051e+06	2.96056e+06	2.58289e+06	2.31883e+06	2.18788e+06	2.52807e+06	2.53926e+06	3.10841e+06	-0.01	-0.06	0.14	0.3	0.38	0.17	0.16	-0.13	0.999999	0.997528	0.999366	0.980771	0.9354	0.967167	0.998573	0.994369
	C40 H60 O7	73403.3	86741.2	59729.2	92501.5	101791	25371.8	91476.3	66800.2	4.68206e+06	-0.24	0.3	-0.33	-0.47	1.53	-0.32	0.14	-6	1	1	1	1	1	1	1	2.03971e-07
[Similar to: Palmitoyl sphingomyelin; ΔMass: 136.1240 Da]	C43 H96 N6 O5 P2	9.12604e+06	1.57461e+06	1.05115e+06	571783	4.71795e+06	4.84063e+06	1.48733e+07	1.72664e+07	6.62685e+06	2.53	3.12	4	0.95	0.91	-0.7	-0.92	0.46	0.572065	0.449052	0.388796	0.920375	0.964573	0.135636	0.977497	1
	C47 H93 N7 O4	2.8592e+06	1.28184e+06	885796	1.00049e+06	1.4191e+06	2.38608e+06	1.10084e+06	3.51846e+06	2.83203e+06	1.16	1.69	1.51	1.01	0.26	1.38	-0.3	0.01	0.997554	0.988362	0.992607	0.996049	0.994776	1	0.999999	1
	C50 H77 N7 O8	4.27899e+06	1.47565e+06	934937	623100	1.10565e+06	1.09844e+06	1.12904e+06	7.81881e+06	3.70613e+06	1.54	2.19	2.78	1.95	1.96	1.92	-0.87	0.21	0.0552112	0.00907501	0.00236285	0.0341407	0.0398167	0.0140433	0.0612958	0.985021
	C49 H86 N6 O4	3.33572e+06	1.02074e+06	590370	729570	1.29454e+06	1.25143e+06	1.37711e+06	2.57632e+06	2.72487e+06	1.71	2.5	2.19	1.37	1.41	1.28	0.37	0.29	0.972875	0.939694	0.954238	0.999594	0.888023	0.999995	1	1
Ceramide (d18:1/24:0)	C42 H83 N O3	1.34375e+06	380873	178742	175093	621547	616937	4.83861e+06	3.09058e+06	1.15753e+06	1.82	2.91	2.94	1.11	1.12	-1.85	-1.2	0.22	0.991223	0.97645	0.971563	0.99888	0.999548	4.90049e-05	0.780039	0.999999
[Similar to: Tetranor-12(S)-HETE; ΔMass: 309.1367 Da]	C36 H41 N5 O2	14066.1	12504.7	12789.2	11459.2	14339.5	16410.9	13729	17133	1.06728e+07	0.17	0.14	0.3	-0.03	-0.22	0.04	-0.28	-9.57	1	1	1	1	1	1	1	1.18453e-06
		4.41628e+06	793250	589077	674931	1.36546e+06	1.99529e+06	3.98725e+06	5.79303e+06	6.67838e+06	2.48	2.91	2.71	1.69	1.15	0.15	-0.39	-0.6	0.927392	0.777343	0.799886	0.996037	0.999999	0.999768	0.967436	0.866557
1-heptadecanoyl-sn-glycero-3-phosphocholine	C25 H52 N O7 P	1.74077e+07	3.56684e+06	1.87054e+06	1.11391e+06	2.87624e+07	2.57239e+07	1.68164e+07	1.90695e+07	1.13068e+07	2.29	3.22	3.97	-0.72	-0.56	0.05	-0.13	0.62	0.0384969	0.0118884	0.00650953	0.633513	0.7793	1	0.999995	0.880593
		2.76446e+06	895192	543448	619854	1.25512e+06	935107	1.03863e+06	2.66504e+06	2.24564e+06	1.63	2.35	2.16	1.14	1.56	1.41	0.05	0.3	0.997181	0.99449	0.996479	0.957405	0.947328	1	1	1
	C56 H107 O3 P S2	6.65083e+06	2.67793e+06	1.77918e+06	2.16015e+06	3.82824e+06	3.38549e+06	3.79978e+06	5.91941e+06	5.20093e+06	1.31	1.9	1.62	0.8	0.97	0.81	0.17	0.35	0.911934	0.82043	0.904649	0.999951	0.995421	0.999996	0.999857	0.999979
1,2-Diarachidonoyl-sn-glycero-3-PC	C48 H80 N O8 P	1.42466e+07	2.32917e+06	1.35946e+06	821792	8.69388e+06	8.68118e+06	9.031e+06	2.05325e+07	6.8842e+06	2.61	3.39	4.12	0.71	0.71	0.66	-0.53	1.05	0.0197895	0.00509069	0.00249958	0.728227	0.900418	0.991172	0.0378873	0.945236
	C33 H62 O4	2.16716e+06	696117	657642	642214	963228	812157	1.02271e+06	1.99237e+06	1.75258e+06	1.64	1.72	1.75	1.17	1.42	1.08	0.12	0.31	0.991452	0.988177	0.989726	0.999522	0.916741	1	1	1
C12-Carnitine	C19 H37 N O4	4.22566e+06	682049	578922	221493	5.48791e+06	6.24965e+06	5.50266e+06	4.64088e+06	2.76617e+06	2.63	2.87	4.25	-0.38	-0.56	-0.38	-0.14	0.61	0.481384	0.312916	0.237649	0.934778	0.937883	0.99986	1	0.999293
Tranexamic acid	C8 H15 N O2	1.81427e+06	451223	227534	148610	660861	1.80464e+06	368174	1.95237e+06	82934.5	2.01	3	3.61	1.46	0.01	2.3	-0.11	4.45	0.999492	0.870456	0.824965	0.999131	1	0.922745	1	0.765656
	C34 H30 N2 O2	7781.82	8406.44	8719.45	8115.2	8992.37	8275.54	8623.77	7478.63	11219.4	-0.11	-0.16	-0.06	-0.21	-0.09	-0.15	0.06	-0.53	0.999204	0.996606	0.995336	0.998299	0.999718	1	1	0.99999
	C39 H77 N O6	2.76718e+06	1.9695e+06	2.96832e+06	2.34225e+06	1.93264e+06	2.58113e+06	1.90319e+06	2.5171e+06	2.20022e+06	0.49	-0.1	0.24	0.52	0.1	0.54	0.14	0.33	0.998839	0.999978	1	0.998254	0.251438	0.999512	1	0.999823
	C16 H24 N7 O P	41616.7	40803	29790.7	36278.7	32402	34937.5	35185.6	32598.3	59909.5	0.03	0.48	0.2	0.36	0.25	0.24	0.35	-0.53	0.999805	0.999151	0.998932	0.998506	0.999632	1	1	1
	C55 H109 O2 P3	3.44381e+06	869035	647619	681771	1.57084e+06	1.30929e+06	1.26009e+06	2.97489e+06	2.41772e+06	1.99	2.41	2.34	1.13	1.4	1.45	0.21	0.51	0.984302	0.965573	0.972078	0.999702	0.970958	1	1	1
		3.01716e+06	1.09833e+06	1.09715e+06	1.52851e+06	1.32506e+06	1.61885e+06	1.31531e+06	2.95363e+06	2.70656e+06	1.46	1.46	0.98	1.19	0.9	1.2	0.03	0.16	0.998895	0.997795	0.999162	0.994867	0.926883	1	1	0.999931
		1.06312e+07	310718	285884	197689	3.28737e+06	5.90564e+06	8.43743e+06	1.95467e+07	5.70032e+06	5.1	5.22	5.75	1.69	0.85	0.33	-0.88	0.9	0.0216703	0.0204177	0.0192407	0.335312	0.942527	0.936316	0.0572047	0.829619
	C57 H99 N O6	5.83013e+06	1.40322e+06	1.13583e+06	2.94762e+06	2.04619e+06	2.5944e+06	4.88008e+06	9.34992e+06	9.60159e+06	2.05	2.36	0.98	1.51	1.17	0.26	-0.68	-0.72	0.801856	0.528474	0.854033	0.941777	0.981508	0.962651	0.930448	0.969609
(2R)-3-(Palmitoyloxy)-2-{[(9Z)-11-(3-pentyl-2-oxiranyl)-9-undecenoyl]oxy}propyl 2-(trimethylammonio)ethyl phosphate	C42 H80 N O9 P	7.8102e+06	2.09357e+06	1.24005e+06	749334	1.08691e+07	1.1459e+07	9.5486e+06	1.50934e+07	6.37888e+06	1.9	2.65	3.38	-0.48	-0.55	-0.29	-0.95	0.29	0.234019	0.138229	0.0918392	0.999972	1	0.999304	0.998805	0.999548
		2.19627e+07	2.46079e+06	935148	532017	1.16247e+07	1.41055e+07	2.328e+07	3.48503e+07	1.35203e+07	3.16	4.55	5.37	0.92	0.64	-0.08	-0.67	0.7	0.115585	0.082181	0.0633704	0.708793	0.887289	0.999997	0.668369	0.999794
2-[(2E,6E,10E,14E,18E,22E,26E,30E)-3,7,11,15,19,23,27,31,35-Nonamethyl-2,6,10,14,18,22,26,30,34-hexatriacontanonaen-1-yl]-1,4-naphthoquinone	C55 H78 O2	4.26838e+07	1.01673e+07	7.30164e+06	3.83111e+06	1.33519e+07	1.9226e+07	2.87212e+07	9.32641e+07	3.35521e+07	2.07	2.55	3.48	1.68	1.15	0.57	-1.13	0.35	0.187233	0.10395	0.0656743	0.457625	0.371704	0.883893	0.459617	0.99967
	C58 H96 N6 O3	3.40226e+06	974938	588407	678566	1.37982e+06	1.13983e+06	1.25647e+06	3.03355e+06	2.56492e+06	1.8	2.53	2.33	1.3	1.58	1.44	0.17	0.41	0.992745	0.982081	0.989264	0.996455	0.976408	1	1	1
		1.38006e+07	5.45473e+06	3.41431e+06	4.53962e+06	9.86031e+06	8.3067e+06	8.90961e+06	1.09584e+07	1.32908e+07	1.34	2.02	1.6	0.49	0.73	0.63	0.33	0.05	0.742698	0.586241	0.627902	1	0.999898	0.999799	1	1
[Similar to: 2,20-dihydroxy-13-methoxy-4,7,17,22,22-pentamethyl-5,10,21,23-tetraoxahexacyclo[18.2.1.0Âa,Âaâ·.0â´,Âaâ¶.0â¶,Âaâ´.0â¸,ÂaÂ?]tricosa-6(14),7,12-trien-11-one; ΔMass: -44.9891 Da]	C21 H29 N5 O4	1.50366e+06	532458	320712	165163	2.64611e+06	2.6202e+06	837422	1.47226e+06	7.17092e+06	1.5	2.23	3.19	-0.82	-0.8	0.84	0.03	-2.25	0.986021	0.957228	0.924057	0.973393	0.96482	0.999233	1	2.27582e-06
[Similar to: N~1~-(2,5-dimethoxyphenyl)-N~2~-(2-pyridin-2-ylethyl)ethanediamide; ΔMass: 38.2801 Da]	C25 H53 N	1.83171e+06	2.24163e+06	1.74137e+06	1.68664e+06	1.69743e+06	2.42376e+06	2.60202e+06	1.49923e+06	1.17523e+07	-0.29	0.07	0.12	0.11	-0.4	-0.51	0.29	-2.68	1	1	1	1	0.999993	1	1	4.82061e-05
[Similar to: Palmitoyl sphingomyelin; ΔMass: 94.0788 Da]	C46 H89 N2 O6 P	1.04692e+07	3.26193e+06	1.90965e+06	1.20044e+06	1.53339e+07	1.31732e+07	1.60369e+07	2.39462e+07	9.52763e+06	1.68	2.45	3.12	-0.55	-0.33	-0.62	-1.19	0.14	0.155762	0.0850351	0.058931	0.960388	0.994334	0.983796	0.941941	0.999993
	C46 H92 N8 O5 S	6.21402e+06	2.07167e+06	1.66652e+06	1.78698e+06	3.31496e+06	2.65954e+06	3.23237e+06	4.18717e+06	4.43886e+06	1.58	1.9	1.8	0.91	1.22	0.94	0.57	0.49	0.910917	0.785143	0.857543	0.999999	0.99895	0.999996	0.999998	0.999987
	C49 H79 N O2	2.03563e+06	589117	342553	331290	435551	681907	1.34033e+06	4.57421e+06	3.63902e+06	1.79	2.57	2.62	2.22	1.58	0.6	-1.17	-0.84	0.945555	0.792305	0.803286	0.853029	0.923552	0.996045	0.901362	0.221095
apronalide	C9 H16 N2 O2	3.65844e+06	337375	283884	142257	640591	3.57029e+06	1.50199e+06	3.52617e+06	388331	3.44	3.69	4.68	2.51	0.04	1.28	0.05	3.24	0.144557	0.0610982	0.0478229	0.917943	0.999996	0.716618	0.998686	0.0303948
1-[(9Z)-hexadecenoyl]-sn-glycero-3-phosphocholine	C24 H48 N O7 P	4.50453e+07	9.30738e+06	3.9592e+06	2.55664e+06	6.82762e+07	6.53067e+07	4.13275e+07	3.58427e+07	2.85575e+07	2.27	3.51	4.14	-0.6	-0.54	0.12	0.33	0.66	0.00326524	0.000654298	0.000273344	0.279406	0.435784	1	0.999985	0.764738
		1.68861e+06	1.0429e+06	759168	973800	1.16044e+06	937647	1.11112e+06	1.77365e+06	1.23827e+06	0.7	1.15	0.79	0.54	0.85	0.6	-0.07	0.45	0.998241	0.993894	0.994655	0.985935	0.926598	1	1	0.999998
[Similar to: (2S,3S,4S,8R,9S,13R,14R,15R,16R)-3,4,8,14,15-pentahydroxy-2,13,16-trimethyl-6-methylidene-10-oxatetracyclo[7.6.1.0Â?,â·.0ÂaÂ?,Âaâ¶]hexadecan-11-one; ΔMass: 262.3023 Da]	C33 H67 N4 O5 P	9.26092e+06	6.96584e+06	5.52389e+06	5.84346e+06	4.40874e+06	5.22859e+06	4.95542e+06	8.80669e+06	1.40115e+06	0.41	0.75	0.66	1.07	0.82	0.9	0.07	2.72	0.419736	0.0189645	0.0742638	0.00220156	0.00489725	0.00230031	1	2.06805e-09
[Similar to: Palmitoyl sphingomyelin; ΔMass: 78.9961 Da]	C45 H84 N O3 P S2	3.97118e+06	865409	600887	467839	4.3881e+06	4.48061e+06	4.67496e+06	1.37731e+07	4.99539e+06	2.2	2.72	3.09	-0.14	-0.17	-0.24	-1.79	-0.33	0.189368	0.12509	0.0929477	0.865571	0.939277	0.986671	0.269141	0.999926
	C27 H44	1.82132e+06	697054	446653	221174	606421	645596	1.27395e+06	2.89897e+06	4.03828e+06	1.39	2.03	3.04	1.59	1.5	0.52	-0.67	-1.15	0.99176	0.922077	0.916818	0.936691	0.972467	0.998957	0.947212	0.470451
	C8 H8 N2 S	10531.8	9286.1	7707.01	9303.89	11264.2	10971.8	10523.5	8810.69	6.96238e+06	0.18	0.45	0.18	-0.1	-0.06	0	0.26	-9.37	1	1	1	1	1	1	1	7.35993e-06
LysoPC(18:3(9Z,12Z,15Z))	C26 H48 N O7 P	7.93016e+06	1.67447e+06	771359	458052	1.11147e+07	1.19132e+07	8.23072e+06	8.96436e+06	6.05467e+06	2.24	3.36	4.11	-0.49	-0.59	-0.05	-0.18	0.39	0.0493231	0.0213644	0.0138383	0.956465	0.761711	1	0.999126	0.913127
[Similar to: Palmitoyl sphingomyelin; ΔMass: 95.0157 Da]		1.09307e+07	2.02797e+06	1.26684e+06	911523	9.29168e+06	1.03562e+07	7.93117e+06	1.76819e+07	9.65447e+06	2.43	3.11	3.58	0.23	0.08	0.46	-0.69	0.18	0.0675085	0.0172051	0.0121095	0.686881	0.815149	0.7928	0.552012	0.962982
[Similar to: Palmitoyl sphingomyelin; ΔMass: 100.9784 Da]	C41 H73 N9 O5 S	3.97118e+06	865409	600887	467839	4.3881e+06	4.48061e+06	4.67496e+06	1.37731e+07	3.65181e+06	2.2	2.72	3.09	-0.14	-0.17	-0.24	-1.79	0.12	0.213679	0.144262	0.116095	0.879981	0.946702	0.988547	0.297715	0.999999
		1.40977e+07	5.48363e+06	3.59151e+06	4.20684e+06	1.09592e+07	8.51661e+06	1.09203e+07	1.13485e+07	1.43851e+07	1.36	1.97	1.74	0.36	0.73	0.37	0.31	-0.03	0.827667	0.6991	0.768831	1	0.988485	0.999992	1	1
[Similar to: Terpestacin; ΔMass: 371.2579 Da]	C41 H72 N7 O5 P	5.79424e+06	660587	324692	211211	2.2414e+06	2.21604e+06	5.49234e+06	9.37088e+06	3.83651e+06	3.13	4.16	4.78	1.37	1.39	0.08	-0.69	0.59	0.219941	0.112561	0.0896275	0.690934	0.789231	0.440018	0.102562	0.999449
[Similar to: Palmitoyl sphingomyelin; ΔMass: 68.0625 Da]	C44 H87 N2 O6 P	1.30597e+07	2.65751e+06	1.8993e+06	1.05296e+06	1.36378e+07	1.53993e+07	1.45595e+07	2.44538e+07	1.10245e+07	2.3	2.78	3.63	-0.06	-0.24	-0.16	-0.9	0.24	0.087637	0.0426666	0.0267572	0.963706	0.998076	0.957704	0.968679	0.999473
[Similar to: Verbascoside A; ΔMass: -374.1210 Da]	C16 H22 O S2	27155	10637	9592.32	10297.3	54162	43197.1	39485.1	24155.5	9.60939e+06	1.35	1.5	1.4	-1	-0.67	-0.54	0.17	-8.47	1	1	1	1	1	1	1	1.75822e-08
[Similar to: Palmitoyl sphingomyelin; ΔMass: 140.1559 Da]	C52 H90 N8 O	1.05443e+06	318619	242757	278294	1.12694e+06	1.20599e+06	1.76694e+07	3.52686e+06	1.00102e+06	1.73	2.12	1.92	-0.1	-0.19	-4.07	-1.74	0.07	0.999997	0.999996	0.999997	1	1	1.41796e-06	0.999751	1
[Similar to: (24E)-12,15-Dihydroxy-3-(pentopyranosyloxy)-9,19-cyclolanost-24-en-26-oic acid; ΔMass: -84.9614 Da]	C36 H58 N P	2.12067e+06	1.18439e+06	514909	543419	720451	1.65616e+06	955246	5.51153e+06	3.93452e+06	0.84	2.04	1.96	1.56	0.36	1.15	-1.38	-0.89	0.957298	0.878277	0.867314	0.983861	0.990497	0.998438	0.702559	0.683413
	C48 H92 N8 O5 S	5.80764e+06	2.34731e+06	1.38564e+06	1.86979e+06	4.07489e+06	3.50259e+06	3.91836e+06	4.50938e+06	5.57482e+06	1.31	2.07	1.64	0.51	0.73	0.57	0.37	0.06	0.828064	0.691657	0.73785	0.999992	0.998202	0.999952	1	1
Irganox 1010	C73 H108 O12	4.15352e+06	4.43075e+06	5.12407e+06	3.43802e+06	3.75458e+06	3.27998e+06	4.17583e+06	4.46614e+06	4.66382e+06	-0.09	-0.3	0.27	0.15	0.34	-0.01	-0.1	-0.17	1	0.999844	0.996004	0.967801	0.938502	0.991274	1	0.999988
1,3-Bis(palmitoyloxy)-2-propanyl (5Z,8Z,11Z,14Z,17Z)-5,8,11,14,17-icosapentaenoate	C55 H96 O6	1.78516e+06	490635	329257	387804	1.09726e+06	706345	1.18666e+06	1.48435e+06	1.99621e+06	1.86	2.44	2.2	0.7	1.34	0.59	0.27	-0.16	0.873762	0.717817	0.757705	1	0.999969	0.999999	0.99983	0.997346
[Similar to: NP-013366; ΔMass: 210.2153 Da]	C42 H86 N5 O5 P3	1.23508e+07	1.50242e+06	1.09002e+06	755180	6.34137e+06	6.4377e+06	6.03645e+06	2.02201e+07	8.85859e+06	3.04	3.5	4.03	0.96	0.94	1.03	-0.71	0.48	0.0173907	0.00765823	0.00441039	0.442677	0.714137	0.898237	0.0122721	0.999796
	C51 H107 N2 O3 P3 S	7.41585e+06	2.26582e+06	1.80797e+06	2.31723e+06	3.79242e+06	3.67579e+06	3.98338e+06	5.93606e+06	6.26611e+06	1.71	2.04	1.68	0.97	1.01	0.9	0.32	0.24	0.74601	0.720703	0.792544	0.999998	0.998926	0.999966	0.999949	1
[Similar to: Palmitoyl sphingomyelin; ΔMass: 107.1068 Da]	C42 H92 N5 O7 P	4.32e+06	687612	325052	92037.8	1.65012e+06	1.8857e+06	1.66811e+06	9.21643e+06	2.85703e+06	2.65	3.73	5.55	1.39	1.2	1.37	-1.09	0.6	0.0953456	0.0480028	0.0355675	0.328687	0.48306	0.501707	0.0224248	0.999999
[Similar to: NP-017061; ΔMass: 684.7305 Da]	C64 H128 N2 O2 P2	1.78467e+06	731989	254229	224857	429595	659206	1.72052e+06	4.35245e+06	4.75825e+06	1.29	2.81	2.99	2.05	1.44	0.05	-1.29	-1.41	0.999923	0.979379	0.982969	0.995645	0.995526	0.999995	0.875119	0.0124226
	C18 H38 N7 O P3	8316.01	7091.68	5773.92	6486.92	8491.59	9389.52	8485.1	7363.21	5.03681e+06	0.23	0.53	0.36	-0.03	-0.18	-0.03	0.18	-9.24	1	1	1	1	1	1	1	1.28514e-06
[Similar to: 5-(furan-3-yl)-1',9'-dihydroxy-12'-(hydroxymethyl)-6'-methyl-3'-oxaspiro[oxolane-3,7'-tricyclo[6.3.1.0â´,ÂaÂ?]dodecane]-2-one; ΔMass: 479.3058 Da]	C52 H67 N5 O2 S2	38780.3	33414.8	32177.7	33263.7	35945.5	33326.3	35497.9	39482	7.3179e+06	0.21	0.27	0.22	0.11	0.22	0.13	-0.03	-7.56	1	1	1	1	1	1	1	2.41867e-07
butoctamide	C16 H29 N O5	343832	86542.7	50975.5	87384.8	415309	255091	105940	285199	4.40041e+06	1.99	2.75	1.98	-0.27	0.43	1.7	0.27	-3.68	0.999263	0.997014	0.99741	0.999921	1	0.999834	0.999792	0.0014577
1-(1Z)-hexadecenyl-2-arachidonoyl-sn-glycero-3-phosphocholine	C44 H80 N O7 P	1.09463e+07	3.45963e+06	1.88182e+06	1.01003e+06	8.23722e+06	9.66079e+06	9.74386e+06	2.54139e+07	9.85111e+06	1.66	2.54	3.44	0.41	0.18	0.17	-1.22	0.15	0.00752083	0.00128762	0.000589543	0.456706	0.823868	0.624312	0.254802	0.749364
[Similar to: Nervonic ceramide; ΔMass: 213.9951 Da]	C40 H88 N5 O12 P	4.69263e+06	709688	294079	147222	2.33988e+06	2.96785e+06	5.63422e+06	4.39325e+06	2.38001e+06	2.73	4	4.99	1	0.66	-0.26	0.1	0.98	0.289101	0.199246	0.142879	0.995734	0.999861	0.800139	0.999967	0.999583
[Similar to: Palmitoyl sphingomyelin; ΔMass: 145.0764 Da]		8.64162e+06	2.08004e+06	1.31279e+06	429927	6.10568e+06	6.42969e+06	7.64074e+06	3.25517e+07	5.90495e+06	2.05	2.72	4.33	0.5	0.43	0.18	-1.91	0.55	0.207367	0.0608538	0.0564551	0.630765	0.716086	0.951299	0.0011532	0.988726
[Similar to: Nervonic ceramide; ΔMass: 46.0525 Da]	C43 H87 N3 O3	3.75334e+06	1.03104e+06	262431	169288	1.89505e+06	2.27022e+06	1.08368e+07	6.49493e+06	3.10592e+06	1.86	3.84	4.47	0.99	0.73	-1.53	-0.79	0.27	0.384157	0.161316	0.128857	0.949861	0.976286	1.01062e-05	0.0459204	1
(2E)-2,5-Dichloro-4-oxo-2-hexenedioic acid	C6 H4 Cl2 O5	552308	429704	455743	480700	443391	580734	510450	497166	727594	0.36	0.28	0.2	0.32	-0.07	0.11	0.15	-0.4	0.430401	1	1	1	1	1	1	1
Piperine	C17 H19 N O3	6.26205e+06	439577	207915	86675.1	2.29881e+06	4.22112e+06	2.14221e+06	5.05225e+06	1.11687e+06	3.83	4.91	6.17	1.45	0.57	1.55	0.31	2.49	0.240349	0.164788	0.157625	0.974084	0.999722	0.905745	0.999995	0.261154
[Similar to: (3S,3aR,4S,4aR,7aR,8R,9aR)-3,4a,8-trimethyl-2,5-dioxo-2H,3H,3aH,4H,4aH,5H,7aH,8H,9H,9aH-azuleno[6,5-b]furan-4-yl (2Z)-2-methylbut-2-enoate; ΔMass: 127.1004 Da]	C28 H35 N5 O2	224503	70461.9	41232.9	43561.6	345170	309539	275711	171068	3.72795e+07	1.67	2.44	2.37	-0.62	-0.46	-0.3	0.39	-7.38	1	1	1	1	1	1	1	7.20046e-12
[Similar to: Palmitoyl sphingomyelin; ΔMass: 14.9637 Da]	C30 H71 N9 O10	5.99491e+06	1.06137e+06	569078	461546	2.03853e+06	2.33005e+06	6.13849e+07	6.64619e+06	3.04592e+06	2.5	3.4	3.7	1.56	1.36	-3.36	-0.15	0.98	0.999964	0.999898	0.999858	0.999996	1	8.71889e-08	1	1
N-{1-[2-(1H-Indol-3-yl)ethyl]piperidin-4-yl}benzamide	C22 H25 N3 O	30564.5	31126.8	18719.5	25439.2	23218.5	29168.9	27570.8	24235.5	5.61825e+07	-0.03	0.71	0.26	0.4	0.07	0.15	0.33	-10.84	1	1	1	1	1	1	1	1.02675e-07
[Similar to: Palmitoyl sphingomyelin; ΔMass: 702.5677 Da]	C80 H153 N6 O11 P	5.81163e+07	1.10529e+06	105362	72226.6	8.82963e+07	1.12949e+08	7.66681e+07	6.24449e+07	3.5038e+07	5.72	9.11	9.65	-0.6	-0.96	-0.4	-0.1	0.73	0.217934	0.200894	0.200503	0.982947	0.87	0.983826	1	0.975666
[Similar to: (2E,6E)-10,11,15,19,23,27,31,35-Octahydroxy-3,7,11,15,19,23,27,31,35-nonamethyl-2,6-hexatriacontadien-1-yl hexopyranoside; ΔMass: -566.3515 Da]	C27 H44	3.08211e+07	1.53728e+07	8.42906e+06	7.45668e+06	5.25183e+06	9.25249e+06	2.5302e+07	6.90193e+07	7.25501e+07	1	1.87	2.05	2.55	1.74	0.28	-1.16	-1.24	0.99942	0.933549	0.933405	0.942235	0.950829	0.999707	0.818177	0.0114677
PC(16:0/0:0)	C24 H50 N O7 P	1.32507e+08	3.21173e+07	1.45441e+07	8.54426e+06	2.09682e+08	1.98059e+08	1.36545e+08	1.42682e+08	9.04953e+07	2.04	3.19	3.95	-0.66	-0.58	-0.04	-0.11	0.55	0.00166007	0.000319545	0.000124597	0.353969	0.421416	1	0.99999	0.560613
	C84 H157 N8 O9 P3	4.969e+07	971302	301157	238836	3.6561e+07	3.23866e+07	8.94352e+07	1.39253e+08	4.07575e+07	5.68	7.37	7.7	0.44	0.62	-0.85	-1.49	0.29	0.297556	0.256842	0.251865	0.928039	0.98384	0.999995	0.682599	0.999981
(3R,4S,9R,11R)-29-(4-Hydroxyphenyl)-3-methoxy-4-methyl-9,11-nonacosanediol	C37 H68 O4	4.32884e+07	8.70933e+06	6.51203e+06	6.12879e+06	1.82999e+07	1.41289e+07	1.41596e+07	3.38287e+07	3.09603e+07	2.31	2.73	2.82	1.24	1.62	1.61	0.36	0.48	0.960232	0.918388	0.936665	0.999989	0.99114	1	1	1
[Similar to: 2,2-dimethyl-6,7-di[(4-nitrobenzyl)oxy]chroman-4-one; ΔMass: 81.3259 Da]	C32 H65 N O4 S	7.4862e+06	2.97738e+07	2.87217e+07	3.20195e+07	1.00648e+07	9.68303e+06	9.13037e+06	5.51308e+06	5.50716e+07	-1.99	-1.94	-2.1	-0.43	-0.37	-0.29	0.44	-2.88	0.997576	0.99231	0.994698	0.999232	0.995882	0.998989	0.972657	0.440337
	C52 H94 N10	1.62306e+06	389513	313736	334462	1.18956e+06	646650	611981	1.95185e+06	1.80462e+06	2.06	2.37	2.28	0.45	1.33	1.41	-0.27	-0.15	0.994567	0.982871	0.983467	0.99939	0.927493	1	0.999849	0.998459
[Similar to: Palmitoyl sphingomyelin; ΔMass: 89.0142 Da]	C42 H78 N7 O5 P	1.28599e+08	2.69386e+07	1.63709e+07	1.05345e+07	8.20412e+07	8.17767e+07	8.06788e+07	2.04022e+08	9.54422e+07	2.26	2.97	3.61	0.65	0.65	0.67	-0.67	0.43	0.0830002	0.0296758	0.0185068	0.799939	0.93085	0.932302	0.100129	0.999159
	C65 H117 N3 O12 P2	3.99138e+07	4.23068e+07	5.26796e+07	3.98398e+07	3.60624e+07	3.34174e+07	4.59663e+07	4.46854e+07	4.77672e+07	-0.08	-0.4	0	0.15	0.26	-0.2	-0.16	-0.26	1	0.999971	0.999991	0.985433	0.956214	0.994879	1	0.999577
	C45 H100 N8 O6 S	1.06483e+08	3.90274e+07	2.26024e+07	3.03915e+07	6.54179e+07	5.32878e+07	5.22846e+07	9.93694e+07	8.7839e+07	1.45	2.24	1.81	0.7	1	1.03	0.1	0.28	0.621047	0.252419	0.445379	0.999665	0.999989	0.997142	1	1
		6.46447e+07	1.18061e+07	9.54455e+06	1.08141e+07	2.4441e+07	1.86531e+07	2.68657e+07	5.707e+07	6.49761e+07	2.45	2.76	2.58	1.4	1.79	1.27	0.18	-0.01	0.979742	0.939459	0.947463	0.999991	0.990788	1	0.999987	0.999855
[Similar to: Palmitoyl sphingomyelin; ΔMass: 133.0396 Da]	C44 H82 N7 O6 P	2.15751e+08	4.25876e+07	2.29203e+07	1.5985e+07	1.20076e+08	1.1536e+08	1.10917e+08	2.86216e+08	1.35475e+08	2.34	3.23	3.75	0.85	0.9	0.96	-0.41	0.67	0.0184652	0.00224786	0.00110883	0.482536	0.629272	0.682792	0.0155944	0.987564
		4.17589e+07	7.96393e+06	6.25245e+06	7.94923e+06	1.61191e+07	1.26489e+07	2.03947e+07	5.23053e+07	4.64845e+07	2.39	2.74	2.39	1.37	1.72	1.03	-0.32	-0.15	0.972896	0.911364	0.920567	1	0.999427	1	0.999928	0.998928
[Similar to: N,N-Dimethylsphingosine; ΔMass: 265.2772 Da]	C38 H76 N2 O2	1.67347e+07	1.71187e+07	1.64824e+07	1.58612e+07	1.84983e+07	1.64005e+07	1.99752e+07	1.56816e+07	7.22212e+07	-0.03	0.02	0.08	-0.14	0.03	-0.26	0.09	-2.11	1	1	0.999994	0.999967	0.999906	0.999986	0.999677	0.00451956
1-(1Z-octadecenyl)-2-arachidonoyl-sn-glycero-3-phosphoethanolamine	C43 H78 N O7 P	2.35534e+07	2.87128e+06	2.01028e+06	1.21834e+06	9.0907e+06	1.02721e+07	7.11385e+07	4.59955e+07	1.7953e+07	3.04	3.55	4.27	1.37	1.2	-1.59	-0.97	0.39	0.911298	0.832123	0.80399	0.987734	0.993602	0.00169817	0.962962	0.999991
PC	C46 H84 N O8 P	1.14246e+08	2.20531e+07	1.13774e+07	7.86678e+06	6.00674e+07	6.75358e+07	1.00007e+08	2.19101e+08	8.48812e+07	2.37	3.33	3.86	0.93	0.76	0.19	-0.94	0.43	0.10952	0.0490782	0.0415123	0.720842	0.846932	0.939266	0.202242	0.998507
N-PALMITOYLDIHYDROSPHINGOMYELIN	C39 H81 N2 O6 P	1.96128e+08	4.44095e+07	1.6906e+07	1.02885e+07	2.29963e+08	2.53516e+08	2.37195e+08	1.73998e+08	1.26473e+08	2.14	3.54	4.25	-0.23	-0.37	-0.27	0.17	0.63	0.0399075	0.0115567	0.00616261	0.999059	0.913274	0.885886	1	0.950549
[Similar to: Palmitoyl sphingomyelin; ΔMass: -14.0166 Da]	C38 H77 N2 O6 P	1.32996e+08	3.20822e+07	1.67451e+07	1.02019e+07	1.97154e+08	2.27378e+08	2.10735e+08	2.23408e+08	1.08684e+08	2.05	2.99	3.7	-0.57	-0.77	-0.66	-0.75	0.29	0.115022	0.0535685	0.0360152	0.998636	0.981621	0.999985	1	0.972509
1-[(9Z)-octadecenyl]-2-hexadecanoyl-sn-glycero-3-phosphocholine	C42 H84 N O7 P	2.79449e+08	6.1957e+07	2.82249e+07	1.73462e+07	1.6445e+08	1.92881e+08	2.34848e+08	4.26853e+08	2.00117e+08	2.17	3.31	4.01	0.76	0.53	0.25	-0.61	0.48	0.0323384	0.0117034	0.00638283	0.563585	0.776129	0.947142	0.499117	0.998935
		2.36175e+07	6.80501e+06	4.13146e+06	5.22886e+06	1.06206e+07	8.10496e+06	9.07426e+06	2.16049e+07	1.99322e+07	1.8	2.52	2.18	1.15	1.54	1.38	0.13	0.24	0.999457	0.998404	0.999367	0.93471	0.916045	1	1	1
[Similar to: 2-(3,4-dimethoxyphenyl)quinoline; ΔMass: 38.1822 Da]	C21 H37 N	1.0704e+07	1.26749e+07	2.15236e+07	2.95134e+07	1.14673e+07	1.17699e+07	1.05267e+07	6.15383e+06	1.37919e+07	-0.24	-1.01	-1.46	-0.1	-0.14	0.02	0.8	-0.37	0.990853	0.999688	1	0.999866	0.999998	0.992605	0.999955	0.994674
		4.2751e+07	9.78955e+06	7.76493e+06	8.52031e+06	1.87208e+07	1.5318e+07	1.4875e+07	3.01876e+07	3.23953e+07	2.13	2.46	2.33	1.19	1.48	1.52	0.5	0.4	0.992607	0.986244	0.988887	0.998521	0.935604	1	1	0.999996
1-(1Z-hexadecenyl)-2-(9Z,12Z-octadecadienoyl)-sn-glycero-3-phosphocholine	C42 H80 N O7 P	1.24516e+08	3.16985e+07	1.56031e+07	8.38135e+06	8.91624e+07	7.82714e+07	9.0227e+07	2.41411e+08	8.10989e+07	1.97	3	3.89	0.48	0.67	0.46	-0.96	0.62	0.324794	0.208651	0.147305	0.986084	0.99868	0.999025	0.678915	0.999999
		3.03736e+07	6.40104e+06	4.28987e+06	4.49625e+06	1.34619e+07	1.00797e+07	9.50839e+06	2.45529e+07	2.45133e+07	2.25	2.82	2.76	1.17	1.59	1.68	0.31	0.31	0.99296	0.984082	0.987807	0.998694	0.9461	1	1	0.999951
1-hexadecanoyl-2-octadecanoyl-sn-glycero-3-phosphocholine	C42 H84 N O8 P	1.67376e+08	2.82658e+07	1.46426e+07	8.93051e+06	7.87275e+07	8.10708e+07	1.4516e+08	2.08892e+08	1.11984e+08	2.57	3.51	4.23	1.09	1.05	0.21	-0.32	0.58	0.0856308	0.0352931	0.021981	0.696242	0.852235	0.910987	0.617579	0.999742
	C39 H70 O4	3.00485e+07	5.97522e+06	4.67382e+06	5.86556e+06	1.18555e+07	9.89268e+06	9.46462e+06	2.33232e+07	2.20625e+07	2.33	2.68	2.36	1.34	1.6	1.67	0.37	0.45	0.967771	0.93796	0.952737	0.999895	0.958568	1	1	1
[Similar to: Palmitoyl sphingomyelin; ΔMass: 135.0551 Da]	C44 H84 N7 O6 P	1.36428e+08	2.5694e+07	1.45111e+07	1.09794e+07	5.54376e+07	5.72391e+07	5.85402e+07	2.20692e+08	8.33459e+07	2.41	3.23	3.64	1.3	1.25	1.22	-0.69	0.71	0.0315536	0.00720055	0.00439415	0.284898	0.424158	0.63344	0.012394	0.979281
		8.36209e+06	5.55738e+06	5.30373e+06	6.25917e+06	4.89668e+06	4.76002e+06	5.23168e+06	8.33747e+06	1.07773e+07	0.59	0.66	0.42	0.77	0.81	0.68	0	-0.37	0.999453	0.998749	0.999534	0.997993	0.940644	1	1	0.999819
Oleoylcarnitine	C25 H47 N O4	1.46633e+07	2.43766e+06	1.1542e+06	707311	2.29102e+07	2.15744e+07	1.03596e+08	1.11552e+07	9.20755e+06	2.59	3.67	4.37	-0.64	-0.56	-2.82	0.39	0.67	0.840294	0.738211	0.689341	0.786973	0.908525	3.95741e-11	0.999999	0.998231
Escitalopram	C20 H21 F N2 O	69931.7	29922.4	23089.9	19853.5	28769	21741.6	15010.5	13729.3	61212.2	1.22	1.6	1.82	1.28	1.69	2.22	2.35	0.19	1	1	0.999999	0.763752	0.999862	0.999858	1	1
[Similar to: 3-[5,7-dihydroxy-2-(4-hydroxyphenyl)-4-oxo-3,4-dihydro-2H-1-benzopyran-3-yl]-5,7-dihydroxy-2-(4-hydroxyphenyl)-3,4-dihydro-2H-1-benzopyran-4-one; ΔMass: -57.7697 Da]	C26 H48 N2 O6	911520	303620	124623	83819.1	1.80797e+06	1.31231e+06	1.82325e+06	455859	5.34723e+07	1.59	2.87	3.44	-0.99	-0.53	-1	1	-5.87	1	1	1	1	1	1	1	6.21749e-07
[Similar to: (2E,6E)-10,11,15,19,23,27,31,35-Octahydroxy-3,7,11,15,19,23,27,31,35-nonamethyl-2,6-hexatriacontadien-1-yl hexopyranoside; ΔMass: -566.3515 Da]	C27 H44	2.12247e+07	6.3974e+06	4.89931e+06	5.55864e+06	5.11495e+06	7.63908e+06	1.29901e+07	3.04248e+07	3.9509e+07	1.73	2.12	1.93	2.05	1.47	0.71	-0.52	-0.9	0.934856	0.634369	0.637882	0.685311	0.79218	0.990526	0.881126	0.150767
[Similar to: 2,20-dihydroxy-13-methoxy-4,7,17,22,22-pentamethyl-5,10,21,23-tetraoxahexacyclo[18.2.1.0Âa,Âaâ·.0â´,Âaâ¶.0â¶,Âaâ´.0â¸,ÂaÂ?]tricosa-6(14),7,12-trien-11-one; ΔMass: -30.9736 Da]	C21 H35 N O8	141514	39354.1	23237.5	17385.4	84423.5	124840	51680.8	130232	1.7583e+07	1.85	2.61	3.03	0.75	0.18	1.45	0.12	-6.96	1	1	1	1	1	1	1	0.00472079
[Similar to: Palmitoyl sphingomyelin; ΔMass: 102.9935 Da]	C48 H75 N3 O7	8.07758e+07	1.73963e+07	1.12499e+07	7.86108e+06	5.68102e+07	5.62896e+07	6.13899e+07	1.6371e+08	5.1867e+07	2.22	2.84	3.36	0.51	0.52	0.4	-1.02	0.64	0.0487303	0.0165805	0.00901743	0.716791	0.865308	0.966289	0.0555646	0.998208
Nervonic ceramide	C42 H81 N O3	9.75941e+06	2.32141e+06	933591	676775	4.63736e+06	4.52803e+06	4.15106e+07	1.64061e+07	7.26054e+06	2.07	3.39	3.85	1.07	1.11	-2.09	-0.75	0.43	0.993455	0.983258	0.980096	0.999788	0.999907	1.40651e-05	0.940623	1
Ondansetron	C18 H19 N3 O	460840	80716	42453.6	31058.7	721098	580911	465648	398519	296279	2.51	3.44	3.89	-0.65	-0.33	-0.01	0.21	0.64	0.997333	0.991322	0.987706	0.959765	0.996119	0.999935	1	0.999965
[Similar to: Palmitoyl sphingomyelin; ΔMass: 2.9628 Da]	C39 H72 N5 O4 P	9.48417e+07	2.87128e+07	1.45706e+07	9.45178e+06	1.10722e+08	1.16848e+08	1.15692e+08	1.48941e+08	7.63789e+07	1.72	2.7	3.33	-0.22	-0.3	-0.29	-0.65	0.31	0.0119087	0.00233859	0.000981554	0.996745	0.999987	0.999921	0.976716	0.988059
		2.19833e+07	7.11919e+06	6.99802e+06	7.36568e+06	1.03826e+07	8.94242e+06	8.90574e+06	1.77581e+07	1.70667e+07	1.63	1.65	1.58	1.08	1.3	1.3	0.31	0.37	0.995605	0.992098	0.994278	0.997926	0.943381	1	1	0.999999
	C35 H75 N5 O6 P2	2.45169e+07	3.60753e+06	2.40986e+06	397961	1.49197e+07	1.54616e+07	4.3142e+07	4.44967e+07	2.20967e+07	2.76	3.35	5.95	0.72	0.67	-0.82	-0.86	0.15	0.324895	0.147364	0.102274	0.900666	0.94117	0.146069	0.989231	0.999911
[Similar to: Palmitoyl sphingomyelin; ΔMass: 98.1087 Da]	C48 H88 N4 O5	1.65224e+08	3.92801e+07	2.01545e+07	1.33962e+07	1.07854e+08	1.19509e+08	1.4155e+08	2.48751e+08	1.2718e+08	2.07	3.04	3.62	0.62	0.47	0.22	-0.59	0.38	0.0412421	0.0137633	0.00728277	0.537711	0.770397	0.979304	0.500155	0.999998
[Similar to: Palmitoyl sphingomyelin; ΔMass: 54.0459 Da]	C45 H80 N4 O5	1.01952e+08	2.6537e+07	1.34749e+07	8.18875e+06	1.47008e+08	1.43826e+08	1.41842e+08	1.54599e+08	9.07673e+07	1.94	2.92	3.64	-0.53	-0.5	-0.48	-0.6	0.17	0.0336848	0.00957179	0.00504462	0.999953	1	0.999923	0.999765	0.99905
	C49 H100 N5 O5 P	4.56632e+07	9.18736e+06	7.76429e+06	7.72842e+06	2.07951e+07	1.60152e+07	2.13472e+07	3.45758e+07	4.22026e+07	2.31	2.56	2.56	1.13	1.51	1.1	0.4	0.11	0.90902	0.828297	0.846792	1	0.994411	0.999875	0.999992	0.997756
	C45 H73 N3 O7	1.70068e+07	3.10183e+06	1.92162e+06	992501	1.3129e+07	1.05467e+07	4.25776e+07	3.36409e+07	1.67658e+07	2.45	3.15	4.1	0.37	0.69	-1.32	-0.98	0.02	0.796731	0.601373	0.540632	0.995718	0.997866	0.0316204	0.989113	0.999959
	C52 H98 N2 O8	8.33823e+07	3.08526e+07	2.10624e+07	2.43519e+07	5.15908e+07	4.15131e+07	4.8554e+07	6.69093e+07	7.59554e+07	1.43	1.99	1.78	0.69	1.01	0.78	0.32	0.13	0.601743	0.360049	0.416993	0.999996	1	0.999114	1	1
	C51 H106 N2 O P2 S	8.33823e+07	3.08526e+07	2.10624e+07	2.43519e+07	5.15908e+07	4.15131e+07	4.8554e+07	6.69093e+07	7.59554e+07	1.43	1.99	1.78	0.69	1.01	0.78	0.32	0.13	0.601743	0.360049	0.416993	0.999996	1	0.999114	1	1
Nervonic ceramide	C42 H81 N O3	1.14504e+07	2.78716e+06	1.11119e+06	887404	5.49232e+06	5.2076e+06	4.76411e+07	1.95088e+07	8.45807e+06	2.04	3.37	3.69	1.06	1.14	-2.06	-0.77	0.44	0.993054	0.981687	0.978645	0.999771	0.999894	1.25785e-05	0.92416	1
[Similar to: Palmitoyl sphingomyelin; ΔMass: 93.0458 Da]	C40 H87 N5 O6 P2	1.74502e+08	3.59828e+07	1.88679e+07	1.21121e+07	7.7981e+07	8.33171e+07	9.68425e+07	2.61635e+08	1.2152e+08	2.28	3.21	3.85	1.16	1.07	0.85	-0.58	0.52	0.0219349	0.00487684	0.00225352	0.254031	0.448031	0.889699	0.00873991	0.99909
	C46 H98 N9 O P	3.04984e+07	1.87049e+07	1.58223e+07	1.56375e+07	2.13177e+07	1.967e+07	2.09578e+07	4.06293e+07	2.82982e+07	0.71	0.95	0.96	0.52	0.63	0.54	-0.41	0.11	0.972866	0.932275	0.941992	1	0.999796	1	0.999972	0.999939
1-palmitoyl-2-[(9Z,12Z,15Z)-octadecatrienoyl]-sn-glycero-3-phosphocholine	C42 H78 N O8 P	8.66187e+07	2.38796e+07	1.60517e+07	1.01702e+07	1.09223e+08	9.56112e+07	1.75562e+08	2.39487e+08	9.65448e+07	1.86	2.43	3.09	-0.33	-0.14	-1.02	-1.47	-0.16	0.270961	0.160865	0.110466	0.969776	0.992767	0.999999	0.770706	0.999998
[Similar to: 1,3-dimethyl 2,4-bis(4-hydroxyphenyl)cyclobutane-1,3-dicarboxylate; ΔMass: 531.6671 Da]		2.31839e+07	5.6527e+06	4.10626e+06	4.78367e+06	1.17656e+07	9.23696e+06	1.00104e+07	1.62745e+07	2.22254e+07	2.04	2.5	2.28	0.98	1.33	1.21	0.51	0.06	0.987647	0.975604	0.980935	0.999411	0.897951	0.999999	1	0.999986
[Similar to: Palmitoyl sphingomyelin; ΔMass: 96.0930 Da]	C48 H86 N4 O5	1.49819e+08	3.42243e+07	2.24536e+07	1.44449e+07	1.34592e+08	1.31546e+08	1.65795e+08	3.11282e+08	1.2538e+08	2.13	2.74	3.37	0.15	0.19	-0.15	-1.05	0.26	0.0777278	0.033738	0.0207315	0.755556	0.894647	0.945623	0.799743	0.999972
		2.17554e+07	8.10298e+06	6.89257e+06	7.98498e+06	1.05921e+07	9.18315e+06	9.43363e+06	1.82072e+07	1.78264e+07	1.42	1.66	1.45	1.04	1.24	1.21	0.26	0.29	0.999401	0.998851	0.999133	0.986156	0.836762	1	1	1
N-oleoylsphingosine-1-phosphocholine	C41 H81 N2 O6 P	2.34845e+08	6.23382e+07	2.42812e+07	1.50478e+07	3.28131e+08	2.87331e+08	3.15185e+08	2.39539e+08	1.62279e+08	1.91	3.27	3.96	-0.48	-0.29	-0.42	-0.03	0.53	0.0420738	0.010426	0.00535714	0.999993	0.993375	1	1	0.984585
1-arachidonoyl-sn-glycero-3-phosphocholine	C28 H50 N O7 P	1.10557e+08	2.10102e+07	1.05143e+07	6.73263e+06	1.93198e+08	1.65851e+08	1.04923e+08	1.15181e+08	6.11632e+07	2.4	3.39	4.04	-0.81	-0.59	0.08	-0.06	0.85	0.11619	0.0453488	0.0300544	0.375715	0.697843	1	0.99999	0.916924
PC	C46 H84 N O8 P	1.98499e+08	4.00936e+07	1.80333e+07	1.66821e+07	8.51751e+07	8.17588e+07	1.14818e+08	2.56024e+08	1.19496e+08	2.31	3.46	3.57	1.22	1.28	0.79	-0.37	0.73	0.024394	0.00683661	0.00530314	0.320667	0.454098	0.860502	0.126437	0.92861
1-Linoleoyl-2-Hydroxy-sn-glycero-3-PC	C26 H50 N O7 P	4.25519e+08	7.76931e+07	3.87293e+07	2.31355e+07	6.45657e+08	6.4268e+08	3.73894e+08	4.07137e+08	2.16696e+08	2.45	3.46	4.2	-0.6	-0.59	0.19	0.06	0.97	0.114477	0.056082	0.0379822	0.78059	0.670622	1	0.999999	0.898117
		1.11447e+08	3.17791e+07	2.29201e+07	2.74229e+07	4.73527e+07	3.99488e+07	4.21502e+07	8.2347e+07	7.85177e+07	1.81	2.28	2.02	1.23	1.48	1.4	0.44	0.51	0.995058	0.98976	0.992306	0.997383	0.915784	1	1	1
[Similar to: Palmitoyl sphingomyelin; ΔMass: 108.0926 Da]	C49 H86 N4 O5	7.82468e+08	1.64149e+08	9.68126e+07	6.76582e+07	6.53748e+08	6.16931e+08	8.28614e+08	1.4547e+09	6.61633e+08	2.25	3.01	3.53	0.26	0.34	-0.08	-0.89	0.24	0.0688156	0.0319193	0.0200055	0.70353	0.887554	0.984514	0.78348	1
	C51 H97 N7 O4	2.15279e+08	6.28135e+07	3.63683e+07	4.58222e+07	1.31217e+08	1.00412e+08	1.21085e+08	1.61977e+08	2.55542e+08	1.78	2.57	2.23	0.71	1.1	0.83	0.41	-0.25	0.938571	0.881751	0.898098	0.999999	0.982583	0.999954	1	0.99957
[Similar to: Palmitoyl sphingomyelin; ΔMass: 85.0402 Da]	C46 H81 N3 O7	1.3478e+09	2.44219e+08	1.17917e+08	7.35896e+07	5.89608e+08	6.08191e+08	8.13041e+08	1.74619e+09	8.51431e+08	2.46	3.51	4.19	1.19	1.15	0.73	-0.37	0.66	0.020856	0.00594672	0.00324599	0.308626	0.473912	0.986718	0.157694	0.993949
Didodecyl-3,3-thiodipropionate (DLTDP)	C30 H58 O4 S	2.65191e+07	2.77257e+07	2.76174e+07	2.74497e+07	2.51701e+07	2.09593e+07	2.23445e+07	2.05084e+07	1.28728e+08	-0.06	-0.06	-0.05	0.08	0.34	0.25	0.37	-2.28	0.999996	0.999988	0.999989	0.998516	0.998013	0.998883	0.996906	0.349916
Militarinone A	C26 H37 N O6	9.8341e+06	3.43764e+06	2.32248e+06	2.07256e+06	1.53205e+07	1.4521e+07	1.16267e+07	7.92381e+06	1.4949e+09	1.52	2.08	2.25	-0.64	-0.56	-0.24	0.31	-7.25	1	1	1	1	1	1	1	2.24356e-11
1-Palmitoyl-2-docosahexaenoyl-sn-glycero-3-phosphocholine	C46 H80 N O8 P	9.14662e+08	1.39275e+08	9.20887e+07	5.71734e+07	5.60657e+08	5.38421e+08	4.81672e+08	1.67379e+09	6.81053e+08	2.72	3.31	4	0.71	0.76	0.93	-0.87	0.43	0.0213159	0.00548091	0.0029872	0.407805	0.649674	0.937697	0.0339323	0.973685
[Similar to: Palmitoyl sphingomyelin; ΔMass: 110.1084 Da]	C49 H88 N4 O5	1.62265e+09	3.12453e+08	1.4476e+08	9.92855e+07	9.63761e+08	1.0715e+09	1.69446e+09	2.66828e+09	1.12945e+09	2.38	3.49	4.03	0.75	0.6	-0.06	-0.72	0.52	0.0666411	0.0312522	0.0208908	0.573458	0.774715	0.999992	0.59407	0.999973
		1.07863e+08	2.88854e+07	2.01199e+07	2.53935e+07	4.31907e+07	3.70222e+07	3.60322e+07	9.77474e+07	9.4347e+07	1.9	2.42	2.09	1.32	1.54	1.58	0.14	0.19	0.999663	0.999274	0.999593	0.983313	0.843538	1	1	1
		2.72675e+08	7.5703e+07	4.52417e+07	6.70651e+07	1.36123e+08	1.0982e+08	1.2124e+08	1.95241e+08	2.7645e+08	1.85	2.59	2.02	1	1.31	1.17	0.48	-0.02	0.976862	0.958501	0.967349	0.999367	0.887297	0.999998	1	1
		3.43386e+08	7.5537e+07	6.00528e+07	5.9451e+07	1.41913e+08	1.16352e+08	1.2631e+08	2.39376e+08	2.2813e+08	2.18	2.52	2.53	1.27	1.56	1.44	0.52	0.59	0.971038	0.939694	0.953259	0.999982	0.991779	1	1	1
1-oleoyl-2-linoleoyl-sn-glycero-3-phosphocholine	C44 H82 N O8 P	2.19591e+09	4.97909e+08	2.43665e+08	1.61529e+08	1.45867e+09	1.51776e+09	2.04113e+09	3.61194e+09	1.62947e+09	2.14	3.17	3.76	0.59	0.53	0.11	-0.72	0.43	0.026697	0.00741509	0.00357779	0.589417	0.805546	0.936114	0.336157	0.990276
Bis(4-ethylbenzylidene)sorbitol	C24 H30 O6	6.8473e+06	2.3241e+06	1.47465e+06	1.46218e+06	1.00682e+07	9.51118e+06	7.29404e+06	4.93485e+06	1.49285e+09	1.56	2.22	2.23	-0.56	-0.47	-0.09	0.47	-7.77	1	1	1	1	1	1	1	7.85482e-09
PC(16:0/0:0)	C24 H50 N O7 P	1.78415e+09	3.3515e+08	1.50081e+08	8.92687e+07	3.13318e+09	2.84525e+09	1.95208e+09	2.03085e+09	1.18861e+09	2.41	3.57	4.32	-0.81	-0.67	-0.13	-0.19	0.59	0.00128722	0.000325582	0.00016729	0.247575	0.338266	1	0.999992	0.460711
		4.33295e+08	9.3265e+07	6.73376e+07	8.53359e+07	1.69935e+08	1.38573e+08	1.51809e+08	2.85325e+08	2.9481e+08	2.22	2.69	2.34	1.35	1.64	1.51	0.6	0.56	0.985407	0.970719	0.977008	0.998757	0.922186	1	1	1
		5.0638e+08	1.37543e+08	8.36941e+07	1.07414e+08	2.07739e+08	1.73132e+08	1.76628e+08	4.1429e+08	3.84514e+08	1.88	2.6	2.24	1.29	1.55	1.52	0.29	0.4	0.978366	0.960906	0.971363	0.999178	0.88799	1	0.999998	1
[Similar to: Palmitoyl sphingomyelin; ΔMass: 107.0248 Da]	C48 H79 N3 O7	2.22796e+09	4.14646e+08	3.0116e+08	2.14463e+08	1.78465e+09	1.5979e+09	1.35543e+09	4.12706e+09	1.83165e+09	2.43	2.89	3.38	0.32	0.48	0.72	-0.89	0.28	0.0279285	0.0040866	0.0021009	0.580024	0.774974	0.780711	0.175365	0.983455
L-Dilinoleoyllecithin	C44 H80 N O8 P	2.84658e+09	6.11573e+08	3.91286e+08	2.44981e+08	2.43798e+09	2.22842e+09	1.88455e+09	4.51142e+09	2.36314e+09	2.22	2.86	3.54	0.22	0.35	0.6	-0.66	0.27	0.0123743	0.00122495	0.000483869	0.663858	0.887789	0.903842	0.456437	0.95787
		8.12416e+08	2.09771e+08	1.41462e+08	1.7576e+08	4.32615e+08	3.42573e+08	3.81282e+08	6.00231e+08	7.8219e+08	1.95	2.52	2.21	0.91	1.25	1.09	0.44	0.05	0.947808	0.901413	0.918981	0.999964	0.9771	0.999992	1	0.999997
[Similar to: Palmitoyl sphingomyelin; ΔMass: 83.0244 Da]	C46 H79 N3 O7	3.40499e+09	8.71605e+08	4.84858e+08	3.15423e+08	2.45844e+09	2.26949e+09	3.43302e+09	7.0532e+09	2.77966e+09	1.97	2.81	3.43	0.47	0.59	-0.01	-1.05	0.29	0.0384595	0.0106645	0.00509118	0.587479	0.786149	0.927918	0.213122	0.998186
[Similar to: Palmitoyl sphingomyelin; ΔMass: 57.0086 Da]	C44 H77 N3 O7	5.70308e+09	1.52139e+09	6.10894e+08	3.51489e+08	3.48155e+09	3.80757e+09	4.72343e+09	6.28806e+09	4.1447e+09	1.91	3.22	4.02	0.71	0.58	0.27	-0.14	0.46	0.00897137	0.00109158	0.000398009	0.685843	0.917384	0.999514	0.747873	0.988386
Irgafos 168	C42 H63 O3 P	4.80938e+08	6.26079e+08	6.6308e+08	7.43072e+08	4.593e+08	3.50805e+08	4.88587e+08	4.13368e+08	1.94589e+09	-0.38	-0.46	-0.63	0.07	0.46	-0.02	0.22	-2.02	1	1	1	0.994289	0.973131	0.994228	0.997498	2.93055e-05
Palmitoyl sphingomyelin	C39 H79 N2 O6 P	4.28946e+09	1.11661e+09	4.0774e+08	2.3814e+08	5.47758e+09	5.83202e+09	5.08044e+09	4.51851e+09	3.36e+09	1.94	3.4	4.17	-0.35	-0.44	-0.24	-0.08	0.35	0.00784088	0.00140655	0.000674532	0.999708	0.97157	0.999393	1	0.882303
1-Palmitoyl-2-linoleoyl-sn-glycero-3-PC	C42 H80 N O8 P	4.532e+09	1.11729e+09	7.45234e+08	4.39743e+08	3.82577e+09	3.60883e+09	6.27653e+09	8.30811e+09	4.1232e+09	2.02	2.6	3.37	0.24	0.33	-0.47	-0.87	0.14	0.0550071	0.0163241	0.00670806	0.864051	0.985132	0.999988	0.762596	0.999275
[Similar to: 2,2-dimethyl-6,7-di[(4-nitrobenzyl)oxy]chroman-4-one; ΔMass: 53.2952 Da]	C30 H61 N O4 S	2.14619e+07	2.48873e+07	2.36034e+07	2.39123e+07	2.15206e+07	1.74603e+07	1.86536e+07	1.6524e+07	1.09774e+08	-0.21	-0.14	-0.16	0	0.3	0.2	0.38	-2.35	0.999996	0.999988	0.999989	0.998056	0.996999	0.998548	0.995418	0.351597
		2.8869e+07	6.228e+06	3.44735e+06	3.75336e+06	5.62737e+06	7.71701e+06	1.08482e+07	2.35453e+07	2.25973e+07	2.21	3.07	2.94	2.36	1.9	1.41	0.29	0.35	0.875533	0.738471	0.751146	1	0.999998	0.999912	0.999999	0.999934
(2R)-2-[(5Z,8Z,11Z,14Z,17Z)-5,8,11,14,17-Icosapentaenoyloxy]-3-(stearoyloxy)propyl 2-(trimethylammonio)ethyl phosphate	C46 H82 N O8 P	9.33598e+08	1.6883e+08	8.93779e+07	6.45661e+07	5.72881e+08	5.11606e+08	4.70705e+08	1.21764e+09	5.10328e+08	2.47	3.38	3.85	0.7	0.87	0.99	-0.38	0.87	0.00551721	0.00060441	0.000251716	0.556029	0.604464	0.682209	0.0222023	0.841626
[Similar to: Palmitoyl sphingomyelin; ΔMass: -2.0165 Da]	C39 H77 N2 O6 P	3.99139e+08	9.13204e+07	4.73961e+07	2.81725e+07	6.05712e+08	6.6279e+08	5.05833e+08	5.52944e+08	2.94496e+08	2.13	3.07	3.82	-0.6	-0.73	-0.34	-0.47	0.44	0.0918319	0.0435277	0.0285318	0.990556	0.866469	1	1	0.971063
[Similar to: Palmitoyl sphingomyelin; ΔMass: 28.9784 Da]	C41 H74 N5 O4 P	3.62839e+08	8.64728e+07	3.52162e+07	2.31401e+07	2.79342e+08	3.04532e+08	2.99059e+08	3.89296e+08	2.41968e+08	2.07	3.37	3.97	0.38	0.25	0.28	-0.1	0.58	0.00856092	0.00152002	0.000570867	0.926604	0.998865	0.997267	0.858112	0.954747
[Similar to: Palmitoyl sphingomyelin; ΔMass: 105.0093 Da]	C48 H77 N3 O7	2.55034e+08	6.28493e+07	4.06895e+07	2.45251e+07	2.35915e+08	2.53081e+08	2.21364e+08	5.1977e+08	1.86298e+08	2.02	2.65	3.38	0.11	0.01	0.2	-1.03	0.45	0.052754	0.00994069	0.00521913	0.642977	0.818301	0.86758	0.593204	0.942624
PC(o-18:2(9Z,12Z)/18:2(9Z,12Z))	C44 H82 N O7 P	4.15812e+08	7.89343e+07	3.86247e+07	2.5544e+07	2.27791e+08	2.40577e+08	2.40292e+08	5.91985e+08	2.4457e+08	2.4	3.43	4.02	0.87	0.79	0.79	-0.51	0.77	0.0101995	0.00232139	0.00108358	0.419102	0.705469	0.895693	0.0747985	0.989675
[Similar to: Palmitoyl sphingomyelin; ΔMass: 78.9932 Da]	C40 H76 N7 O6 P	1.56087e+08	4.06044e+07	2.22989e+07	1.37065e+07	4.35536e+07	9.03043e+07	1.26224e+08	3.66791e+08	1.12167e+08	1.94	2.81	3.51	1.84	0.79	0.31	-1.23	0.48	0.519305	0.391397	0.298662	0.878397	0.984175	0.998931	0.444644	0.999999
PC(18:3(9Z,12Z,15Z)/18:2(9Z,12Z))	C44 H78 N O8 P	1.64131e+08	3.46122e+07	2.2767e+07	1.25101e+07	1.60669e+08	1.91968e+08	1.61894e+08	3.7015e+08	1.68323e+08	2.25	2.85	3.71	0.03	-0.23	0.02	-1.17	-0.04	0.135309	0.0552166	0.0357302	0.867025	0.948954	0.989241	0.630851	0.994276
[Similar to: Palmitoyl sphingomyelin; ΔMass: 112.1242 Da]	C49 H100 O2 P2 S	3.27052e+08	6.60305e+07	3.16574e+07	2.27253e+07	1.53582e+08	1.22378e+08	4.38619e+08	4.75746e+08	2.36164e+08	2.31	3.37	3.85	1.09	1.42	-0.42	-0.54	0.47	0.365281	0.217628	0.156787	0.822268	0.823086	0.0132847	0.663019	1
[Similar to: (2E,6E)-10,11,15,19,23,27,31,35-Octahydroxy-3,7,11,15,19,23,27,31,35-nonamethyl-2,6-hexatriacontadien-1-yl hexopyranoside; ΔMass: -566.3515 Da]	C27 H44	5.88599e+07	2.25193e+07	1.18677e+07	8.10787e+06	1.33787e+07	2.30877e+07	3.92406e+07	1.26751e+08	1.2438e+08	1.39	2.31	2.86	2.14	1.35	0.58	-1.11	-1.08	0.981565	0.837222	0.840356	0.905537	0.941277	0.996836	0.890901	0.243086
[Similar to: Palmitoyl sphingomyelin; ΔMass: 56.0612 Da]	C45 H82 N4 O5	3.68576e+08	7.86241e+07	3.92622e+07	2.32072e+07	2.83478e+08	3.69751e+08	3.12093e+08	5.27863e+08	3.11316e+08	2.23	3.23	3.99	0.38	0	0.24	-0.52	0.24	0.0595596	0.0258219	0.0164303	0.953256	0.998005	0.991088	0.993363	0.999989
1-Stearoyl-2-arachidonoylplasmenylcholine	C46 H84 N O7 P	3.85736e+08	7.03491e+07	3.55759e+07	2.31142e+07	2.0732e+08	2.08865e+08	2.06156e+08	6.2303e+08	2.2991e+08	2.46	3.44	4.06	0.9	0.89	0.9	-0.69	0.75	0.011205	0.00245092	0.00113768	0.355855	0.552931	0.746599	0.0128666	0.986466
[Similar to: Oleamide; ΔMass: 255.2569 Da]	C34 H68 N2 O2	3.35264e+07	3.88073e+07	3.56935e+07	3.5206e+07	3.7767e+07	2.89962e+07	2.75947e+07	2.19267e+07	1.55804e+08	-0.21	-0.09	-0.07	-0.17	0.21	0.28	0.61	-2.22	0.999933	0.999993	1	0.999996	0.999964	0.999695	0.999175	0.00738762
PC(18:1/0:0)	C26 H52 N O7 P	3.93398e+08	9.51878e+07	4.01245e+07	2.49633e+07	7.41415e+08	6.73624e+08	4.05195e+08	3.723e+08	2.60691e+08	2.05	3.29	3.98	-0.91	-0.78	-0.04	0.08	0.59	0.0127267	0.00365436	0.00189819	0.182642	0.331185	1	0.999951	0.73797
	C36 H72 N2 O2	3.74094e+07	4.58965e+07	4.46127e+07	4.26016e+07	4.17931e+07	3.42465e+07	3.24376e+07	2.38606e+07	1.84139e+08	-0.29	-0.25	-0.19	-0.16	0.13	0.21	0.65	-2.3	0.999932	0.999988	1	0.999983	0.999815	0.999329	0.99275	0.00835817
[Similar to: Palmitoyl sphingomyelin; ΔMass: 84.0928 Da]	C48 H82 N8 O	5.72438e+08	1.08151e+08	4.87159e+07	3.24876e+07	3.34412e+08	4.18238e+08	6.23706e+08	8.97902e+08	3.97547e+08	2.4	3.55	4.14	0.78	0.45	-0.12	-0.65	0.53	0.0613806	0.0292879	0.0193052	0.660949	0.868966	0.999999	0.734142	0.999944
		1.27331e+08	2.44245e+07	1.66193e+07	1.79813e+07	5.21188e+07	3.98591e+07	4.86297e+07	6.46971e+07	9.49236e+07	2.38	2.94	2.82	1.29	1.68	1.39	0.98	0.42	0.954433	0.925973	0.938181	1	0.924583	1	1	1
N-myristoylsphingosine-1-phosphocholine	C37 H75 N2 O6 P	2.73656e+08	6.32616e+07	2.81074e+07	1.83358e+07	4.24719e+08	4.74482e+08	3.49408e+08	3.55989e+08	2.04648e+08	2.11	3.28	3.9	-0.63	-0.79	-0.35	-0.38	0.42	0.133091	0.0650581	0.0458932	0.948481	0.767299	0.999999	1	0.960175
[Similar to: Palmitoyl sphingomyelin; ΔMass: 62.9986 Da]	C46 H75 N3 O6	4.51773e+08	7.56537e+07	4.06967e+07	2.76255e+07	2.47671e+08	2.57768e+08	2.29055e+08	5.22989e+08	2.93288e+08	2.58	3.47	4.03	0.87	0.81	0.98	-0.21	0.62	0.0247829	0.00705969	0.00371638	0.737435	0.941089	0.868026	0.238783	0.993508
[Similar to: Palmitoyl sphingomyelin; ΔMass: 82.0770 Da]	C47 H84 N4 O5	5.24159e+08	1.11632e+08	6.26887e+07	4.21692e+07	4.20197e+08	4.78905e+08	5.15167e+08	8.68187e+08	4.52211e+08	2.23	3.06	3.64	0.32	0.13	0.02	-0.73	0.21	0.0634392	0.028525	0.0179975	0.8375	0.962192	0.983498	0.9627	1
		6.53515e+07	1.87116e+07	1.31983e+07	1.53835e+07	2.70611e+07	2.19459e+07	2.31892e+07	5.43348e+07	5.4962e+07	1.8	2.31	2.09	1.27	1.57	1.49	0.27	0.25	0.997156	0.994365	0.995401	0.992934	0.821478	1	1	1
N-STEAROYLSPHINGOMYELIN	C41 H83 N2 O6 P	5.03002e+08	1.15178e+08	4.77826e+07	2.78787e+07	5.8211e+08	6.82959e+08	6.44053e+08	5.74724e+08	3.77895e+08	2.13	3.4	4.17	-0.21	-0.44	-0.36	-0.19	0.41	0.0477744	0.0157712	0.00932	1	0.999711	0.999927	0.999978	0.991832
[Similar to: NP-022075; ΔMass: 21.0948 Da]	C24 H33 N O6	1.46361e+06	532615	350930	360943	2.30982e+06	2.11396e+06	1.75399e+06	1.15102e+06	4.39886e+08	1.46	2.06	2.02	-0.66	-0.53	-0.26	0.35	-8.23	1	1	1	1	1	1	1	3.77427e-09
1-octadecanoyl-2-(4Z,7Z,10Z,13Z,16Z,19Z-docosahexaenoyl)-sn-glycero-3-phosphocholine	C48 H84 N O8 P	3.83525e+08	5.76378e+07	4.21266e+07	3.01203e+07	2.26571e+08	1.98268e+08	1.88297e+08	7.59028e+08	2.77999e+08	2.73	3.19	3.67	0.76	0.95	1.03	-0.98	0.46	0.0328834	0.00818826	0.00501222	0.348493	0.491963	0.814209	0.00567208	0.975905
Platelet-activating factor	C26 H54 N O7 P	5.40992e+08	1.04157e+08	5.5128e+07	3.37926e+07	9.28231e+08	8.28931e+08	5.59308e+08	5.92228e+08	3.18052e+08	2.38	3.29	4	-0.78	-0.62	-0.05	-0.13	0.77	0.0193714	0.00623549	0.00339002	0.431239	0.554722	1	0.999992	0.759187
DL-Dipalmitoylphosphatidylcholine	C40 H80 N O8 P	1.14379e+09	2.55896e+08	1.17201e+08	7.42255e+07	7.84607e+08	8.4931e+08	9.08501e+08	1.0938e+09	7.95537e+08	2.16	3.29	3.95	0.54	0.43	0.33	0.06	0.52	0.0133082	0.00197973	0.000762299	0.929424	0.997232	1	0.978226	0.997402
	C57 H99 N O S	1.35108e+08	3.21533e+07	2.15223e+07	2.82239e+07	5.94245e+07	4.57678e+07	5.17899e+07	9.71576e+07	1.31125e+08	2.07	2.65	2.26	1.18	1.56	1.38	0.48	0.04	0.982066	0.966437	0.971386	0.999227	0.874761	0.999997	1	1
[Similar to: Palmitoyl sphingomyelin; ΔMass: 109.0403 Da]	C40 H87 N5 O7 P2	8.53015e+08	2.00469e+08	7.32897e+07	5.3214e+07	3.57331e+08	4.44238e+08	4.98952e+08	1.24455e+09	5.25901e+08	2.09	3.54	4	1.26	0.94	0.77	-0.54	0.7	0.0270167	0.00800269	0.00423838	0.30217	0.467296	0.618502	0.0189095	0.98334
	C51 H103 N7 O4	8.25527e+07	2.2358e+07	1.82622e+07	2.1304e+07	3.3272e+07	2.93936e+07	2.97711e+07	7.08337e+07	7.22163e+07	1.88	2.18	1.95	1.31	1.49	1.47	0.22	0.19	0.998691	0.997039	0.998093	0.997015	0.94618	1	1	0.999971
	C27 H59 O11 P3	686234	691825	585098	667708	487631	603038	326316	584227	367314	-0.01	0.23	0.04	0.49	0.19	1.07	0.23	0.9	0.61135	1	1	0.999919	0.999988	0.999435	0.999999	0.996637
[Similar to: Palmitoyl sphingomyelin; ΔMass: 111.0563 Da]	C48 H83 N3 O7	9.43346e+07	2.20106e+07	8.49803e+06	6.10051e+06	4.27473e+07	4.93475e+07	6.44646e+07	1.6278e+08	6.11478e+07	2.1	3.47	3.95	1.14	0.93	0.55	-0.79	0.63	0.0571152	0.0198767	0.0122535	0.413256	0.523272	0.845669	0.0297066	0.997732
		2.27997e+07	5.97815e+06	4.06052e+06	4.48479e+06	1.03899e+07	8.41468e+06	1.113e+07	1.69266e+07	2.40902e+07	1.93	2.49	2.35	1.13	1.44	1.03	0.43	-0.08	0.958182	0.917279	0.9259	0.999973	0.952096	0.999962	1	0.999967
[Similar to: (2E,6E)-3,7,11,15,19,23,27,31,35-Nonamethyl-2,6,34-hexatriacontatriene-1,11,15,19,23,27,31-heptol; ΔMass: -370.2932 Da]	C27 H44	4.36195e+07	1.48024e+07	5.65253e+06	2.47498e+06	4.15389e+07	4.17046e+07	4.39179e+07	4.68642e+07	3.9411e+07	1.56	2.95	4.14	0.07	0.06	-0.01	-0.1	0.15	0.000267227	1.24598e-06	8.53461e-08	0.934813	0.999822	1	0.997386	0.976464
	C84 H166 N6 O12 P2 S	4.52429e+07	1.73938e+06	309251	215353	1.73564e+07	1.90583e+07	3.2512e+07	7.04101e+07	2.28335e+07	4.7	7.19	7.71	1.38	1.25	0.48	-0.64	0.99	0.0423228	0.0333616	0.0328976	0.542753	0.611223	0.976341	0.17186	0.990274
	C38 H79 N3 O2	2.17593e+06	7.41939e+06	7.41921e+06	6.90046e+06	3.3433e+06	2.61318e+06	2.15089e+06	1.03358e+06	1.54505e+07	-1.77	-1.77	-1.67	-0.62	-0.26	0.02	1.07	-2.83	0.945954	0.926691	0.997489	1	0.999987	0.990059	0.99441	0.207528
[Similar to: Palmitoyl sphingomyelin; ΔMass: 94.0123 Da]	C38 H81 N6 O9 P	4.22281e+07	7.93784e+06	5.12233e+06	2.83253e+06	3.19513e+07	3.92859e+07	3.08076e+07	6.37119e+07	3.47493e+07	2.41	3.04	3.9	0.4	0.1	0.45	-0.59	0.28	0.133936	0.0615483	0.0410259	0.834758	0.934377	0.818086	0.976175	0.991822
	C45 H73 N3 O6	6.9009e+06	1.00454e+06	612996	364958	2.84205e+06	2.31668e+06	1.56631e+07	9.06289e+06	4.1302e+06	2.78	3.49	4.24	1.28	1.57	-1.18	-0.39	0.74	0.890194	0.796697	0.75908	0.996408	0.997552	0.0019066	0.99737	0.999969
		8.33164e+06	1.82973e+06	2.08636e+06	2.48404e+06	4.03125e+06	2.60908e+06	5.6828e+06	7.87192e+06	8.87847e+06	2.19	2	1.75	1.05	1.68	0.55	0.08	-0.09	0.996089	0.987382	0.9906	0.999467	0.945597	1	0.99994	0.999964
		4.23869e+07	1.36492e+07	1.18853e+07	1.02305e+07	1.11444e+07	2.20144e+07	2.0078e+07	3.19248e+07	2.87259e+07	1.63	1.83	2.05	1.93	0.95	1.08	0.41	0.56	0.57027	0.566493	0.617036	0.99172	0.999231	0.959596	0.997944	0.986871
[Similar to: (1R,2R,4S,16R,17R,20S)-2-hydroxy-13,20-dimethoxy-4,7,17,22,22-pentamethyl-5,10,21,23-tetraoxahexacyclo[18.2.1.0Âa,Âaâ·.0â´,Âaâ¶.0â¶,Âaâ´.0â¸,ÂaÂ?]tricosa-6,8(12),13-trien-11-one; ΔMass: -131.0048 Da]		9.55071e+06	8.91287e+06	5.43899e+06	6.48391e+06	6.5499e+06	7.13265e+06	5.96194e+06	6.30489e+06	6.56274e+06	0.1	0.81	0.56	0.54	0.42	0.68	0.6	0.54	0.999999	0.999	0.999483	0.995621	0.999901	0.999749	0.998718	0.831409
1-(1Z-octadecenyl)-2-(4Z,7Z,10Z,13Z,16Z,19Z-docosahexaenoyl)-sn-glycero-3-phosphocholine	C48 H84 N O7 P	4.85298e+07	9.25653e+06	5.02037e+06	3.43439e+06	2.70275e+07	2.56128e+07	2.34148e+07	7.8286e+07	2.89752e+07	2.39	3.27	3.82	0.84	0.92	1.05	-0.69	0.74	0.00900601	0.00149752	0.000720957	0.376983	0.546214	0.692908	0.00296893	0.961994
	C39 H81 N5 O6 P2	4.30478e+06	624157	420208	358177	1.35117e+06	1.51034e+06	1.5115e+07	7.0199e+06	2.2864e+06	2.79	3.36	3.59	1.67	1.51	-1.81	-0.71	0.91	0.998961	0.997668	0.996952	0.999975	0.99996	0.000850473	0.999484	1
[Similar to: Palmitoyl sphingomyelin; ΔMass: 91.0301 Da]	C40 H85 N5 O6 P2	4.86355e+07	1.05063e+07	4.79503e+06	3.43952e+06	2.77026e+07	2.94757e+07	2.36782e+07	5.63531e+07	3.05501e+07	2.21	3.34	3.82	0.81	0.72	1.04	-0.21	0.67	0.00282271	0.000397798	0.000158422	0.419876	0.555134	0.370668	0.172338	0.833743
	C39 H88 N6 O5 P2	4.28753e+07	1.09945e+07	6.57063e+06	4.13028e+06	6.02939e+07	5.19813e+07	5.59233e+07	6.73435e+07	3.83165e+07	1.96	2.71	3.38	-0.49	-0.28	-0.38	-0.65	0.16	0.0655221	0.0227425	0.0121046	0.998142	0.999998	0.993097	0.997318	0.999937
[Similar to: Oleamide; ΔMass: 300.3150 Da]		2.67078e+06	6.32467e+06	5.6658e+06	6.47185e+06	3.68765e+06	2.92265e+06	1.83414e+06	1.23854e+06	1.71602e+07	-1.24	-1.09	-1.28	-0.47	-0.13	0.54	1.11	-2.68	0.962092	0.968172	0.996186	1	0.999999	0.99901	0.999519	0.0628211
	C41 H69 N3 O7	4.74134e+06	936914	390569	250391	2.2715e+06	2.1257e+06	1.94665e+07	5.23363e+06	3.18063e+06	2.34	3.6	4.24	1.06	1.16	-2.04	-0.14	0.58	0.985035	0.974273	0.967592	0.999292	0.999306	5.13108e-06	0.999938	0.999999
[Similar to: (2E,6E)-3,7,11,15,19,23,27,31,35-Nonamethyl-2,6,34-hexatriacontatriene-1,11,15,19,23,27,31-heptol; ΔMass: -73.0261 Da]	C45 H79 N O2	6.21939e+06	2.38386e+06	1.13013e+06	751095	1.19443e+06	2.46543e+06	4.1642e+06	1.23803e+07	1.24195e+07	1.38	2.46	3.05	2.38	1.33	0.58	-0.99	-1	0.985641	0.856276	0.869687	0.907557	0.955484	0.997761	0.950339	0.301039
	C28 H64 N6 O2 S	7.4778e+06	1.84608e+06	1.255e+06	1.51453e+06	3.00072e+06	2.61193e+06	2.68496e+06	5.49981e+06	5.61396e+06	2.02	2.57	2.3	1.32	1.52	1.48	0.44	0.41	0.992377	0.983003	0.988233	0.997368	0.896954	1	1	1
[Similar to: Palmitoyl sphingomyelin; ΔMass: 101.9791 Da]		5.8216e+07	1.22738e+07	5.22965e+06	2.39063e+06	4.93522e+07	4.79625e+07	4.56637e+07	8.68749e+07	4.49907e+07	2.25	3.48	4.61	0.24	0.28	0.35	-0.58	0.37	0.00245261	7.07216e-05	2.88625e-05	0.40078	0.745189	0.708606	0.626494	0.766564
		3.95647e+07	1.66554e+07	1.26574e+07	1.42478e+07	2.48148e+07	2.30711e+07	2.46165e+07	2.44298e+07	3.3655e+07	1.25	1.64	1.47	0.67	0.78	0.68	0.7	0.23	0.454728	0.188549	0.24569	0.999967	0.999941	0.994829	0.992537	0.999993
1-stearoyl-2-oleoyl-sn-glycero-3-phosphoethanolamine zwitterion	C41 H80 N O8 P	6.24691e+06	1.75991e+06	1.1598e+06	513849	3.60648e+06	3.3406e+06	1.81893e+07	1.07547e+07	5.17445e+06	1.83	2.43	3.6	0.79	0.9	-1.54	-0.78	0.27	0.92927	0.807656	0.719857	0.999879	0.999198	0.00118341	0.999851	0.999999
[Similar to: Palmitoyl sphingomyelin; ΔMass: 130.0104 Da]		5.26969e+07	7.52665e+06	4.35707e+06	2.61396e+06	4.6184e+07	2.80477e+07	3.7032e+07	9.57316e+07	3.93216e+07	2.81	3.6	4.33	0.19	0.91	0.51	-0.86	0.42	0.0207338	0.00269415	0.00163914	0.744605	0.392965	0.844794	0.282895	0.980923
	C49 H88 N6 O4	9.99847e+06	2.83816e+06	2.14516e+06	2.28313e+06	4.30548e+06	3.64e+06	3.92227e+06	7.28577e+06	6.78358e+06	1.82	2.22	2.13	1.22	1.46	1.35	0.46	0.56	0.980996	0.963957	0.969487	0.99845	0.951999	1	0.999999	1
		4.08954e+06	1.58252e+06	1.29178e+06	1.72095e+06	2.0819e+06	1.89215e+06	1.8746e+06	4.26478e+06	4.05828e+06	1.37	1.66	1.25	0.97	1.11	1.13	-0.06	0.01	0.999671	0.999136	0.999717	0.981958	0.854822	1	1	0.999997
		3.31629e+07	1.61488e+07	9.14886e+06	9.47277e+06	9.4832e+06	1.7675e+07	2.11612e+07	3.20185e+07	3.11681e+07	1.04	1.86	1.81	1.81	0.91	0.65	0.05	0.09	0.441672	0.223032	0.302069	0.82188	0.999811	0.999607	0.999991	0.999937
	C45 H71 N3 O7	4.34292e+06	643406	440705	377071	2.47926e+06	1.99405e+06	2.32453e+07	6.67549e+06	3.32865e+06	2.75	3.3	3.53	0.81	1.12	-2.42	-0.62	0.38	0.998828	0.997341	0.995994	0.999992	0.999973	1.81585e-05	0.999921	1
[Similar to: Palmitoyl sphingomyelin; ΔMass: 133.0396 Da]	C44 H82 N7 O6 P	4.42304e+07	1.37036e+07	5.12118e+06	3.72807e+06	2.9568e+07	2.74976e+07	2.93108e+07	7.68123e+07	3.26624e+07	1.69	3.11	3.57	0.58	0.69	0.59	-0.8	0.44	0.802644	0.454184	0.38756	1	1	1	0.694495	0.999707
	C54 H114 N5 O5 P	1.69787e+07	7.0819e+06	3.8589e+06	5.49513e+06	9.71383e+06	8.42733e+06	8.66447e+06	1.46925e+07	1.20458e+07	1.26	2.14	1.63	0.81	1.01	0.97	0.21	0.5	0.802932	0.526624	0.797907	1	0.999346	0.999179	0.999637	0.999057
[Similar to: Palmitoyl sphingomyelin; ΔMass: 69.0456 Da]	C46 H81 N3 O6	4.17582e+07	9.82002e+06	7.58828e+06	3.9124e+06	2.75917e+07	2.89216e+07	5.18794e+07	8.87155e+07	3.44632e+07	2.09	2.46	3.42	0.6	0.53	-0.31	-1.09	0.28	0.152376	0.0772242	0.0502475	0.702793	0.807659	0.998768	0.260195	0.999966
Platelet-activating factor	C26 H54 N O7 P	4.88013e+07	1.1721e+07	5.2117e+06	3.11986e+06	7.24813e+07	7.09212e+07	4.55891e+07	4.98032e+07	2.86947e+07	2.06	3.23	3.97	-0.57	-0.54	0.1	-0.03	0.77	0.00594929	0.00106308	0.000462068	0.661241	0.604441	0.999949	0.999989	0.613558
[Similar to: Palmitoyl sphingomyelin; ΔMass: 131.0260 Da]	C49 H80 N5 O4 P	2.80436e+07	1.3216e+07	6.24103e+06	4.43334e+06	3.05884e+07	3.11588e+07	3.10812e+07	8.10131e+07	2.89337e+07	1.09	2.17	2.66	-0.13	-0.15	-0.15	-1.53	-0.05	0.138739	0.0255597	0.0100311	0.844111	0.989749	0.999199	0.00126046	0.999965
[Similar to: N-Acetylsphingosine; ΔMass: 304.3130 Da]	C42 H79 N O3	2.42343e+06	598229	207198	123300	1.64335e+06	1.48264e+06	1.26711e+07	4.6449e+06	1.8394e+06	2.02	3.55	4.3	0.56	0.71	-2.39	-0.94	0.4	0.999224	0.997872	0.997144	0.999993	0.999996	1.84732e-05	0.987291	1
[Similar to: Palmitoyl sphingomyelin; ΔMass: 26.9629 Da]	C41 H72 N5 O4 P	2.67744e+07	6.2459e+06	4.24996e+06	2.40465e+06	3.03871e+07	2.83338e+07	4.06269e+07	5.96237e+07	1.862e+07	2.1	2.66	3.48	-0.18	-0.08	-0.6	-1.16	0.52	0.175669	0.0997905	0.0630448	0.986456	0.999145	1	0.894548	0.999951
[Similar to: Palmitoyl sphingomyelin; ΔMass: 67.0301 Da]	C38 H85 N5 O6 P2	2.71145e+07	7.12792e+06	5.44098e+06	2.79608e+06	2.84596e+07	2.65419e+07	2.93143e+07	7.94871e+07	2.18873e+07	1.93	2.32	3.28	-0.07	0.03	-0.11	-1.55	0.31	0.15037	0.0756552	0.0494321	0.741386	0.954152	0.965634	0.178521	0.99993
	C63 H118 N6 O4 S	2.37645e+07	2.00101e+07	1.53997e+07	1.22818e+07	1.88087e+07	1.75621e+07	1.80247e+07	2.41661e+07	1.11466e+07	0.25	0.63	0.95	0.34	0.44	0.4	-0.02	1.09	0.841912	0.178562	0.0369887	0.825348	0.817474	0.710131	0.999896	0.0024813
Phaseic acid	C15 H20 O5	110836	52094.2	33563.3	28745.9	199528	178382	155836	115167	3.22462e+07	1.09	1.72	1.95	-0.85	-0.69	-0.49	-0.06	-8.18	1	1	1	1	1	1	1	4.46622e-09
		1.59568e+07	456836	402502	307058	1.16514e+07	9.84713e+06	2.55216e+07	3.81802e+07	1.22508e+07	5.13	5.31	5.7	0.45	0.7	-0.68	-1.26	0.38	0.13346	0.119118	0.117056	0.679987	0.814039	0.98123	0.673264	0.965213
(2R)-3-[(13Z)-13-Docosen-1-yloxy]-2-[(5Z,8Z,11Z,14Z)-5,8,11,14-icosatetraenoyloxy]propyl 2-(trimethylammonio)ethyl phosphate	C50 H92 N O7 P	2.55388e+07	5.63356e+06	3.36865e+06	1.95134e+06	1.56307e+07	1.52994e+07	2.1388e+07	8.24123e+07	1.79862e+07	2.18	2.92	3.71	0.71	0.74	0.26	-1.69	0.51	0.210179	0.0979943	0.0722212	0.602668	0.659454	0.977001	0.00168225	1
		4.19151e+06	2.43038e+06	2.04573e+06	2.23691e+06	2.3658e+06	2.32857e+06	2.70037e+06	4.28758e+06	4.16963e+06	0.79	1.03	0.91	0.83	0.85	0.63	-0.03	0.01	0.99883	0.998328	0.998607	0.994953	0.871251	1	1	1
	C39 H68 O4	7.96667e+06	2.26681e+06	1.37943e+06	1.9056e+06	4.73764e+06	3.77505e+06	4.01623e+06	5.87313e+06	8.64534e+06	1.81	2.53	2.06	0.75	1.08	0.99	0.44	-0.12	0.95063	0.90844	0.924025	0.999978	0.971778	0.99998	1	0.999996
		323025	314720	336359	351598	269888	339581	233871	302950	240110	0.04	-0.06	-0.12	0.26	-0.07	0.47	0.09	0.43	0.388366	1	1	1	1	1	1	1
Dimethylaminopropionylphenothiazine	C17 H18 N2 O S	12416.9	9718.09	9288.62	8793.55	11429.5	12505	13276.5	11209.2	1.27413e+07	0.35	0.42	0.5	0.12	-0.01	-0.1	0.15	-10	1	1	1	1	1	1	1	0.000744478
[Similar to: Palmitoyl sphingomyelin; ΔMass: 73.0044 Da]	C42 H82 N O9 P	2.83769e+07	6.17418e+06	2.82211e+06	1.89297e+06	2.95034e+07	3.16883e+07	2.47616e+07	4.08509e+07	2.15297e+07	2.2	3.33	3.91	-0.06	-0.16	0.2	-0.53	0.4	0.0141192	0.00414397	0.00221066	0.987963	0.999999	0.951829	0.970453	0.988846
1-(4Z,7Z,10Z,13Z,16Z,19Z-docosahexaenoyl)-sn-glycero-3-phosphocholine	C30 H50 N O7 P	1.80446e+07	3.48707e+06	1.73432e+06	1.03242e+06	3.13795e+07	2.54847e+07	1.82039e+07	1.82462e+07	8.97079e+06	2.37	3.38	4.13	-0.8	-0.5	-0.01	-0.02	1.01	0.195694	0.0864394	0.0610491	0.4757	0.756186	1	0.999991	0.930026
[Similar to: 1,3-dimethyl 2,4-bis(4-hydroxyphenyl)cyclobutane-1,3-dicarboxylate; ΔMass: 531.6672 Da]		1.4391e+07	5.52835e+06	4.5422e+06	5.23213e+06	8.13421e+06	7.59366e+06	8.45969e+06	9.74813e+06	1.05598e+07	1.38	1.66	1.46	0.82	0.92	0.77	0.56	0.45	0.735186	0.502341	0.622777	1	1	0.999723	0.999491	0.995768
	C54 H98 N2 O8	1.16517e+07	4.29485e+06	2.7579e+06	3.15438e+06	7.60766e+06	6.23547e+06	7.37128e+06	8.36224e+06	1.14792e+07	1.44	2.08	1.89	0.62	0.9	0.66	0.48	0.02	0.860844	0.771879	0.80122	0.999999	0.994782	0.999829	1	1
[Similar to: Palmitoyl sphingomyelin; ΔMass: 67.0298 Da]	C38 H85 N5 O6 P2	5.19494e+07	1.27082e+07	7.66283e+06	4.6542e+06	3.7106e+07	3.23017e+07	4.63357e+07	8.62947e+07	3.48621e+07	2.03	2.76	3.48	0.49	0.69	0.16	-0.73	0.58	0.328229	0.171105	0.109795	0.956398	0.924263	0.999368	0.904085	0.99989
[Similar to: Palmitoyl sphingomyelin; ΔMass: 77.0138 Da]	C39 H83 N5 O6 P2	2.45986e+07	6.30754e+06	4.05714e+06	2.28412e+06	1.77726e+07	1.62969e+07	1.85936e+07	4.339e+07	1.73063e+07	1.96	2.6	3.43	0.47	0.59	0.4	-0.82	0.51	0.122778	0.0588839	0.035718	0.702941	0.942169	0.988647	0.399396	0.998921
	C39 H72 O4	3.2721e+06	844380	640437	734026	1.30801e+06	1.09528e+06	1.06541e+06	2.89569e+06	2.94226e+06	1.95	2.35	2.16	1.32	1.58	1.62	0.18	0.15	0.999482	0.998921	0.999299	0.992135	0.866114	1	1	0.999999
L-β,γ-Dipalmitoyl-N,N-dimethyl-α-cephalin	C39 H78 N O8 P	4.72419e+07	1.01396e+07	5.48703e+06	3.29123e+06	4.21206e+07	4.56173e+07	4.38625e+07	7.14827e+07	3.53452e+07	2.22	3.11	3.84	0.17	0.05	0.11	-0.6	0.42	0.0150168	0.00445877	0.00221709	0.874261	0.980354	0.902296	0.924516	0.996327
	C50 H101 N8 O P	1.13177e+07	3.26829e+06	2.2458e+06	2.66985e+06	4.81374e+06	3.99693e+06	4.15167e+06	9.48913e+06	9.42789e+06	1.79	2.33	2.08	1.23	1.5	1.45	0.25	0.26	0.981959	0.956561	0.970511	0.999964	0.997565	1	1	0.999999
Acetyl-L-carnitine	C9 H17 N O4	3.61827e+06	720552	461186	216677	1.23237e+06	4.53212e+06	1.09227e+06	4.2915e+06	452826	2.33	2.97	4.06	1.55	-0.32	1.73	-0.25	3	0.999721	0.819278	0.773979	0.998737	1	0.970445	1	0.783932
Cholesteryl octadecadienoate	C45 H76 O2	808482	314409	182363	89496.2	189528	359685	546495	1.80632e+06	1.66763e+06	1.36	2.15	3.18	2.09	1.17	0.57	-1.16	-1.04	0.9869	0.888839	0.885771	0.956981	0.979855	0.997639	0.910701	0.328689
[Similar to: Palmitoyl sphingomyelin; ΔMass: 57.0117 Da]	C33 H77 N9 O10	1.62824e+08	2.86255e+07	1.47296e+07	8.91699e+06	7.88126e+07	8.50141e+07	1.43464e+08	2.07211e+08	9.10808e+07	2.51	3.47	4.19	1.05	0.94	0.18	-0.35	0.84	0.0810313	0.031495	0.0191462	0.692677	0.802212	0.896002	0.602358	0.996689
	C17 H31 N O6	537458	168036	83365.3	36821.9	894119	814467	458984	468598	2.22118e+07	1.68	2.69	3.87	-0.73	-0.6	0.23	0.2	-5.37	1	1	1	1	1	1	1	2.51604e-08
	C23 H41 N	4.4905e+06	5.44182e+06	7.43231e+06	1.29492e+07	4.79601e+06	4.74548e+06	4.31486e+06	2.64685e+06	6.46346e+06	-0.28	-0.73	-1.53	-0.09	-0.08	0.06	0.76	-0.53	0.998021	0.999778	1	0.999879	0.999999	0.994923	0.999973	0.999815
	C62 H109 N O S	3.95912e+07	1.66515e+07	1.27069e+07	1.43823e+07	2.46825e+07	2.24469e+07	2.45828e+07	3.17894e+07	3.19764e+07	1.25	1.64	1.46	0.68	0.82	0.69	0.32	0.31	0.435817	0.168994	0.2224	0.999987	0.999902	0.994633	1	0.999995
	C51 H94 N6 O4	2.66731e+07	9.28906e+06	7.01561e+06	7.87108e+06	1.4288e+07	1.22538e+07	1.36592e+07	2.21778e+07	2.07066e+07	1.52	1.93	1.76	0.9	1.12	0.97	0.27	0.37	0.719778	0.483012	0.567075	0.99983	0.999996	0.99863	1	1
[Similar to: Nervonic ceramide; ΔMass: -15.9953 Da]	C42 H81 N O2	9.59036e+06	3.17181e+06	1.0898e+06	951302	5.34041e+06	5.66199e+06	2.86743e+07	1.9696e+07	9.62052e+06	1.6	3.14	3.33	0.84	0.76	-1.58	-1.04	0	0.752208	0.524239	0.487347	0.98606	0.991892	5.20016e-05	0.151643	0.999954
	C51 H103 N4 O5 P	607562	154539	173652	127592	489293	375357	325347	549079	1.08025e+06	1.98	1.81	2.25	0.31	0.69	0.9	0.15	-0.83	0.998179	0.997336	0.997758	0.971525	0.715522	1	1	0.999825
		8.93561e+06	4.08745e+06	3.33413e+06	3.59772e+06	4.49845e+06	4.27187e+06	4.60053e+06	8.91281e+06	8.3464e+06	1.13	1.42	1.31	0.99	1.06	0.96	0	0.1	0.998544	0.99712	0.997592	0.989251	0.807366	1	1	1
		1.73606e+07	1.11784e+07	1.06296e+07	1.05478e+07	1.25487e+07	1.18173e+07	1.28553e+07	2.0291e+07	1.59678e+07	0.64	0.71	0.72	0.47	0.55	0.43	-0.23	0.12	0.983385	0.969208	0.96948	0.999999	0.9554	1	1	1
	C51 H102 N5 O5 P	2.14741e+07	4.1021e+06	3.48139e+06	3.73894e+06	7.53633e+06	5.93053e+06	1.37954e+07	2.48011e+07	3.02726e+07	2.39	2.62	2.52	1.51	1.86	0.64	-0.21	-0.5	0.943185	0.830422	0.843948	1	0.999999	0.999985	0.998637	0.96558
Didecyldimethylammonium	C22 H47 N	7.9928e+06	4.75994e+06	9.45359e+06	6.45468e+06	5.91202e+06	6.15453e+06	5.65003e+06	2.44002e+06	5.45718e+06	0.75	-0.24	0.31	0.44	0.38	0.5	1.71	0.55	1	1	0.999975	0.999998	1	0.999999	0.881042	1
Palmitoylcarnitine	C23 H45 N O4	1.51354e+07	2.58092e+06	1.13166e+06	697679	2.07311e+07	2.02291e+07	8.6308e+07	1.22255e+07	8.27224e+06	2.55	3.74	4.44	-0.45	-0.42	-2.51	0.31	0.87	0.532462	0.366893	0.306472	0.756395	0.882511	1.34337e-12	0.999999	0.987516
N-Pentacosanoylglycine	C27 H53 N O3	218462	62266.7	37446.7	22374.6	95947.9	110829	95606	288805	5.4667e+07	1.81	2.54	3.29	1.19	0.98	1.19	-0.4	-7.97	1	1	1	1	1	1	1	6.93176e-06
	C55 H100 N6 O4	1.45418e+07	4.12267e+06	2.49427e+06	3.03376e+06	6.03931e+06	5.12848e+06	5.37656e+06	1.30864e+07	1.15235e+07	1.82	2.54	2.26	1.27	1.5	1.44	0.15	0.34	0.993526	0.985204	0.991323	0.996337	0.96578	1	1	1
[Similar to: Palmitoyl sphingomyelin; ΔMass: 17.0148 Da]	C40 H82 N O7 P	1.03986e+08	2.16924e+07	8.69491e+06	5.27544e+06	6.0615e+07	6.54918e+07	9.02998e+07	1.22891e+08	7.26634e+07	2.26	3.58	4.3	0.78	0.67	0.2	-0.24	0.52	0.0342025	0.01347	0.0074224	0.694808	0.908945	0.999861	0.809164	0.999322
[Similar to: Palmitoyl sphingomyelin; ΔMass: 70.0775 Da]	C46 H84 N4 O5	7.62497e+07	1.7468e+07	9.10351e+06	5.75818e+06	5.8584e+07	7.1648e+07	5.94425e+07	1.34112e+08	6.31985e+07	2.13	3.07	3.73	0.38	0.09	0.36	-0.81	0.27	0.0765082	0.0307939	0.0199761	0.874588	0.969724	0.906062	0.967962	0.999627
	C32 H50 N6 O5	2.44405e+06	577556	310447	132736	2.72972e+06	2.98505e+06	1.96312e+06	2.22221e+06	4.98677e+07	2.08	2.98	4.2	-0.16	-0.29	0.32	0.14	-4.35	1	1	1	1	1	1	1	2.89006e-06
		1.77562e+07	5.80412e+06	4.09231e+06	4.30992e+06	1.10673e+07	9.0106e+06	1.01143e+07	1.21492e+07	1.8397e+07	1.61	2.12	2.04	0.68	0.98	0.81	0.55	-0.05	0.956457	0.919312	0.923803	0.999981	0.974149	0.999964	1	0.99997
	C55 H98 N6 O4	4.0507e+07	1.44321e+07	9.41835e+06	1.092e+07	2.207e+07	1.84261e+07	1.99797e+07	3.64161e+07	3.41808e+07	1.49	2.1	1.89	0.88	1.14	1.02	0.15	0.24	0.828626	0.690809	0.779359	1	0.999381	0.999606	0.99997	1
	C43 H69 N3 O7	5.64917e+06	762201	478021	260562	2.45945e+06	2.40382e+06	2.7608e+07	7.75551e+06	3.87093e+06	2.89	3.56	4.44	1.2	1.23	-2.29	-0.46	0.55	0.997092	0.992743	0.990505	0.999912	0.999953	3.63188e-06	0.999874	1
		2.73114e+07	5.67665e+06	4.76735e+06	5.36345e+06	1.22295e+07	9.88558e+06	1.41529e+07	2.25837e+07	1.85376e+07	2.27	2.52	2.35	1.16	1.47	0.95	0.27	0.56	0.726545	0.628387	0.665105	1	0.999996	0.99794	1	1
1-Stearoyl-2-arachidonoylplasmenylcholine	C46 H84 N O7 P	9.66166e+07	1.48953e+07	8.53279e+06	6.3709e+06	4.22523e+07	3.73858e+07	4.32068e+07	1.24238e+08	5.26093e+07	2.7	3.5	3.92	1.19	1.37	1.16	-0.36	0.88	0.0207034	0.00599526	0.003262	0.351664	0.463245	0.796153	0.0539193	0.983103
[Similar to: 2-hydroxy-6-[(E)-2-phenylethenyl]-4-{[(2S,3R,4S,5S,6R)-3,4,5-trihydroxy-6-(hydroxymethyl)oxan-2-yl]oxy}benzoic acid; ΔMass: 121.2928 Da]	C31 H57 N O6	1.26798e+06	339187	175300	69529	1.45722e+06	1.42478e+06	611193	1.11934e+06	5.14495e+07	1.9	2.85	4.19	-0.2	-0.17	1.05	0.18	-5.34	1	1	1	1	1	1	1	7.49215e-07
	C84 H163 N8 O16 P	1.76685e+07	284970	152658	129984	6.71929e+06	7.83571e+06	2.14405e+07	8.77904e+07	1.27698e+07	5.95	6.85	7.09	1.39	1.17	-0.28	-2.31	0.47	0.354578	0.335483	0.334101	0.732677	0.821495	0.953341	0.0386796	0.999954
1-hexadecanoyl-2-(13Z-docosenoyl)-sn-glycero-3-phosphoethanolamine	C43 H84 N O8 P	1.21265e+08	2.66052e+07	1.06316e+07	7.84041e+06	6.19793e+07	7.17771e+07	7.98815e+07	1.82456e+08	7.83347e+07	2.19	3.51	3.95	0.97	0.76	0.6	-0.59	0.63	0.0311398	0.00942117	0.00506262	0.464345	0.637004	0.967881	0.281503	0.991531
[Similar to: NP-003749; ΔMass: 397.5450 Da]		1.66614e+07	5.57398e+06	3.62926e+06	4.32219e+06	6.78713e+06	6.22528e+06	5.65809e+06	1.29907e+07	1.52966e+07	1.58	2.2	1.95	1.3	1.42	1.56	0.36	0.12	0.992776	0.982979	0.98541	0.99781	0.834901	0.99996	1	1
	C50 H96 N2 O8	3.76397e+07	1.12093e+07	8.71761e+06	1.01172e+07	1.83984e+07	1.61066e+07	1.70422e+07	2.66488e+07	2.51689e+07	1.75	2.11	1.9	1.03	1.22	1.14	0.5	0.58	0.861667	0.723363	0.768103	1	0.999985	0.999964	1	0.999981
[Similar to: 3-[(2-pyridylthio)methyl]-4,5-dihydro-1H-pyrazol-5-one; ΔMass: 22.1939 Da]	C14 H31 N O	2.59558e+06	3.5591e+07	4.32013e+07	4.58427e+07	1.57518e+06	2.11185e+06	1.40489e+06	2.06301e+06	3.41246e+06	-3.78	-4.06	-4.14	0.72	0.3	0.89	0.33	-0.39	2.12075e-12	8.45768e-13	8.23785e-13	0.999948	1	0.999512	0.999997	1
	C83 H165 N4 O13 P3	7.01343e+07	3.07013e+06	216000	151479	2.78419e+07	3.27783e+07	5.13948e+07	7.94743e+07	4.04301e+07	4.51	8.34	8.85	1.33	1.1	0.45	-0.18	0.79	0.0413353	0.0280254	0.0277925	0.645297	0.862204	0.999542	0.694233	0.985874
		1.80649e+07	5.3605e+06	4.11472e+06	4.25356e+06	8.02346e+06	6.8388e+06	7.45655e+06	1.5916e+07	1.47469e+07	1.75	2.13	2.09	1.17	1.4	1.28	0.18	0.29	0.996051	0.991184	0.993984	0.998565	0.946298	1	1	0.99998
1-hexadecyl-2-[(9Z,12Z)-octadecadienoyl]-sn-glycero-3-phosphocholine	C42 H82 N O7 P	8.38043e+07	1.99508e+07	1.25027e+07	8.94907e+06	7.29101e+07	6.38218e+07	8.56227e+07	1.66701e+08	6.20515e+07	2.07	2.74	3.23	0.2	0.39	-0.03	-0.99	0.43	0.0794385	0.032601	0.01878	0.791974	0.932246	0.997394	0.305026	0.999926
1-hexadecyl-2-[(9Z,12Z)-octadecadienoyl]-sn-glycero-3-phosphocholine	C42 H82 N O7 P	6.7668e+07	1.55127e+07	9.05544e+06	6.01928e+06	4.88402e+07	4.47646e+07	5.72978e+07	1.01591e+08	5.52906e+07	2.13	2.9	3.49	0.47	0.6	0.24	-0.59	0.29	0.189092	0.0824578	0.0456025	0.941494	0.990169	0.999494	0.866995	0.99999
[Similar to: Palmitoyl sphingomyelin; ΔMass: 14.0155 Da]	C35 H76 N10 O3 S	8.60139e+07	1.81198e+07	9.16446e+06	5.48061e+06	1.08292e+08	1.24874e+08	1.20375e+08	9.82689e+07	6.6171e+07	2.25	3.23	3.97	-0.33	-0.54	-0.48	-0.19	0.38	0.0616685	0.0210201	0.0127031	0.999973	0.986631	0.999905	1	0.982368
	C53 H92 N6 O4	2.82863e+07	9.99433e+06	5.84608e+06	7.62758e+06	1.86989e+07	1.47593e+07	1.778e+07	2.14278e+07	2.64804e+07	1.5	2.27	1.89	0.6	0.94	0.67	0.4	0.1	0.760477	0.603628	0.642721	1	0.99933	0.999732	1	0.999823
		5.86056e+07	1.47928e+07	9.57563e+06	5.67854e+06	7.13243e+07	6.07007e+07	7.11816e+07	1.14097e+08	5.11487e+07	1.99	2.61	3.37	-0.28	-0.05	-0.28	-0.96	0.2	0.0510168	0.0163959	0.00861993	0.936443	0.992589	0.965963	0.957808	0.999999
		4.83265e+07	1.72516e+07	1.43624e+07	1.66401e+07	2.87363e+07	2.48764e+07	2.27713e+07	4.12234e+07	3.44046e+07	1.49	1.75	1.54	0.75	0.96	1.09	0.23	0.49	0.65552	0.428517	0.529516	0.980775	0.999932	0.999018	1	0.999956
		1.01683e+07	3.24144e+06	1.9464e+06	2.5266e+06	4.54392e+06	3.84788e+06	3.94338e+06	9.41043e+06	8.3732e+06	1.65	2.39	2.01	1.16	1.4	1.37	0.11	0.28	0.989344	0.968844	0.982382	0.998732	0.972137	1	1	1
		1.23372e+08	3.25407e+07	9.71073e+06	5.64017e+06	8.68928e+07	9.31759e+07	1.04616e+08	1.3158e+08	8.88397e+07	1.92	3.67	4.45	0.51	0.4	0.24	-0.09	0.47	0.000999296	5.18967e-05	1.99517e-05	0.572242	0.914993	0.996968	0.988165	0.860113
[Similar to: D-α-Tocopherol; ΔMass: -1.0084 Da]	C25 H52 N O2 P	3.93912e+07	1.07606e+07	5.28935e+06	3.70013e+06	1.86274e+07	1.80239e+07	3.4835e+06	4.94037e+07	2.55529e+07	1.87	2.9	3.41	1.08	1.13	3.5	-0.33	0.62	0.00024266	7.01173e-06	1.48046e-06	0.0290019	0.0933163	2.22653e-06	0.00717317	0.862839
	C51 H70 O4 P2	297369	185434	172715	179834	191366	194584	264195	339524	2.21773e+07	0.68	0.78	0.73	0.64	0.61	0.17	-0.19	-6.22	1	1	1	1	1	1	1	4.62097e-07
[Similar to: 2-[3-chloro-2-hydroxy-4-methoxy-6-(methoxycarbonyl)phenoxy]-6-hydroxy-4-methylbenzoic acid; ΔMass: 393.5055 Da]	C47 H73 N3 O6	9.56157e+06	1.22269e+06	794245	503850	3.16768e+06	3.45181e+06	1.99526e+07	1.48807e+07	5.76785e+06	2.97	3.59	4.25	1.59	1.47	-1.06	-0.64	0.73	0.765313	0.595526	0.551429	0.957914	0.975751	0.00549583	0.787126	0.999933
Ceramide (d18:1/24:0)	C42 H83 N O3	1.06159e+07	3.58049e+06	1.29974e+06	1.03667e+06	6.08552e+06	6.1808e+06	3.13221e+07	2.16292e+07	1.02422e+07	1.57	3.03	3.36	0.8	0.78	-1.56	-1.03	0.05	0.767623	0.526418	0.492865	0.987925	0.993716	4.91116e-05	0.152077	0.999978
Lansoprazole	C16 H14 F3 N3 O2 S	7332.77	6493.42	6614.44	6528.67	7195.26	7548.96	7039.99	6468.27	14993.9	0.18	0.15	0.17	0.03	-0.04	0.06	0.18	-1.03	0.999438	0.998262	0.997551	0.99989	1	1	1	0.999996
		1.7225e+07	4.00669e+06	2.74244e+06	3.63413e+06	7.66908e+06	6.5867e+06	1.18865e+07	2.25332e+07	2.38322e+07	2.1	2.65	2.24	1.17	1.39	0.54	-0.39	-0.47	0.958703	0.876279	0.884975	1	0.998183	0.999996	0.995793	0.937642
[Similar to: methyl 3,5-dichloro-2-hydroxy-6-[4-hydroxy-2-methoxy-6-(methoxycarbonyl)phenoxy]-4-methylbenzoate; ΔMass: 37.4116 Da]	C29 H57 N O3	83377.1	30640	22053.9	21684.9	27584.2	36868	25359.3	128182	3.7198e+07	1.44	1.92	1.94	1.6	1.18	1.72	-0.62	-8.8	1	1	1	1	1	1	1	9.45774e-07
	C39 H83 N5 O6 P2	5.89042e+06	1.75278e+06	1.51939e+06	844892	6.40412e+06	6.26927e+06	3.04957e+07	2.33546e+07	5.60759e+06	1.75	1.95	2.8	-0.12	-0.09	-2.37	-1.99	0.07	0.894479	0.831365	0.770511	0.993562	0.999172	0.00349474	0.735845	0.999975
[Similar to: Palmitoyl sphingomyelin; ΔMass: 781.5646 Da]	C80 H163 N3 O14 P2 S	3.745e+07	1.29527e+06	130498	103902	2.69759e+07	3.14737e+07	2.8629e+07	4.29588e+07	2.21143e+07	4.85	8.16	8.49	0.47	0.25	0.39	-0.2	0.76	0.0226886	0.0156062	0.0154493	0.995259	0.999998	0.999986	0.979202	0.938349
	C52 H99 O4 P S	1.94487e+07	5.05109e+06	3.36101e+06	4.11385e+06	8.97813e+06	7.05788e+06	8.16827e+06	1.47922e+07	1.40718e+07	1.95	2.53	2.24	1.12	1.46	1.25	0.39	0.47	0.921581	0.859603	0.880026	0.999913	0.978164	0.999979	1	1
DL-Carnitine	C7 H15 N O3	5.80879e+06	1.21443e+06	761740	484264	1.58732e+06	7.58185e+06	1.52079e+06	6.82828e+06	460556	2.26	2.93	3.58	1.87	-0.38	1.93	-0.23	3.66	0.999878	0.785217	0.738682	0.996909	1	0.935956	1	0.697068
[Similar to: Palmitoyl sphingomyelin; ΔMass: 86.9986 Da]	C40 H81 N5 O6 P2	3.9551e+07	8.80688e+06	4.61033e+06	2.01872e+06	2.19248e+07	2.15793e+07	1.77829e+07	5.06058e+07	2.67101e+07	2.17	3.1	4.29	0.85	0.87	1.15	-0.36	0.57	0.0251126	0.00528228	0.00219718	0.673865	0.915786	0.736958	0.0784161	0.906518
		2.4012e+07	1.75035e+07	2.06658e+07	1.36535e+07	2.03995e+07	1.91908e+07	2.31154e+07	2.28677e+07	2.32635e+07	0.46	0.22	0.81	0.24	0.32	0.05	0.07	0.05	0.991691	0.911267	0.811926	0.960725	0.951032	0.991681	1	1
PC(18:1/0:0)	C26 H52 N O7 P	5.22742e+07	9.75249e+06	3.35173e+06	1.93432e+06	8.59678e+07	8.299e+07	5.12045e+07	4.90593e+07	3.09679e+07	2.42	3.96	4.76	-0.72	-0.67	0.03	0.09	0.76	0.00321942	0.000873809	0.00048705	0.371617	0.413908	0.999992	0.999948	0.481032
PC(P-16:0/16:0)	C40 H80 N O7 P	8.5772e+07	1.90023e+07	7.86807e+06	5.34523e+06	5.69084e+07	7.41695e+07	6.68429e+07	1.31303e+08	6.06283e+07	2.17	3.45	4	0.59	0.21	0.36	-0.61	0.5	0.0389412	0.0142064	0.00745554	0.833717	0.979197	0.936604	0.550703	0.999963
1-Linoleoyl-2-Hydroxy-sn-glycero-3-PC	C26 H50 N O7 P	3.78274e+07	7.33475e+06	3.80072e+06	2.16615e+06	5.3555e+07	5.04025e+07	3.28394e+07	3.55515e+07	1.96088e+07	2.37	3.32	4.13	-0.5	-0.41	0.2	0.09	0.95	0.0532831	0.0199856	0.0111903	0.688838	0.765897	1	0.999998	0.857801
		1.41963e+07	5.98429e+06	5.66629e+06	5.23e+06	8.19647e+06	7.59498e+06	7.94263e+06	1.12372e+07	1.39129e+07	1.25	1.33	1.44	0.79	0.9	0.84	0.34	0.03	0.992022	0.98493	0.984635	0.998869	0.903244	1	1	0.999999
		1.44327e+07	9.64579e+06	8.48899e+06	8.56582e+06	1.09137e+07	9.8123e+06	1.06728e+07	1.83182e+07	1.50313e+07	0.58	0.77	0.75	0.4	0.56	0.44	-0.34	-0.06	0.997263	0.994094	0.995609	1	0.999401	1	0.999434	0.997645
	C37 H75 N5 O8 S	2.73707e+07	2.93419e+06	1.56091e+06	779237	1.21593e+07	1.34739e+07	4.52115e+07	4.02764e+07	1.9322e+07	3.22	4.13	5.13	1.17	1.02	-0.72	-0.56	0.5	0.422869	0.255189	0.215221	0.881151	0.942761	0.0118762	0.487671	0.999759
	C22 H37 N O9	670452	162765	88471.3	23306.7	1.18144e+06	1.03753e+06	348372	590622	2.14563e+07	2.04	2.92	4.85	-0.82	-0.63	0.94	0.18	-5	1	1	1	1	1	1	1	2.83267e-08
		8.3703e+06	2.2749e+06	1.47333e+06	1.28207e+06	1.3751e+06	2.73673e+06	4.41177e+06	1.1181e+07	8.61672e+06	1.88	2.51	2.71	2.61	1.61	0.92	-0.42	-0.04	0.999142	0.997857	0.997292	0.988541	0.963271	0.999999	1	0.999998
[Similar to: methyl 3,5-dichloro-2-hydroxy-6-[4-hydroxy-2-methoxy-6-(methoxycarbonyl)phenoxy]-4-methylbenzoate; ΔMass: 137.4276 Da]	C33 H61 N O6	667927	151926	78859.1	39315.2	468630	434604	183914	578963	3.11327e+07	2.14	3.08	4.09	0.51	0.62	1.86	0.21	-5.54	1	1	1	1	1	1	1	3.73443e-07
	C30 H66 N6 O2 S	1.33098e+07	2.95243e+06	1.99983e+06	2.51184e+06	5.22041e+06	4.18667e+06	4.85657e+06	9.64832e+06	9.96164e+06	2.17	2.73	2.41	1.35	1.67	1.45	0.46	0.42	0.977259	0.95791	0.965486	0.999283	0.915142	0.999999	1	1
Dexamisole	C11 H12 N2 S	58094.8	14677.8	16394.1	17226.9	8648.67	9806.54	9214.79	43384.2	3.23e+06	1.98	1.83	1.75	2.75	2.57	2.66	0.42	-5.8	1	1	1	1	1	1	1	0.00704451
	C50 H91 N O P2	3.17919e+06	957208	889505	704257	1.08885e+06	1.79557e+06	1.55383e+06	5.39389e+06	2.58978e+06	1.73	1.84	2.17	1.55	0.82	1.03	-0.76	0.3	0.129261	0.0871421	0.0611655	0.236085	0.496321	0.492477	0.149317	1
	C55 H102 N6 O4	1.10286e+06	722130	675354	736910	670589	608596	777298	1.16439e+06	1.3085e+06	0.61	0.71	0.58	0.72	0.86	0.5	-0.08	-0.25	0.999191	0.998226	0.999089	0.999108	0.911014	1	1	1
[Similar to: N-(1,1-dioxotetrahydro-1H-1lambda~6~-thiophen-3-yl)-2,3-dihydro-1-benzofuran-5-sulfonamide; ΔMass: 180.3540 Da]	C26 H51 N5 O4	499948	411912	436942	395446	457507	423982	369837	416400	687701	0.28	0.19	0.34	0.13	0.24	0.43	0.26	-0.46	0.952879	0.861842	0.906655	0.890535	1	0.840023	0.887233	0.949053
	C45 H96 N3 O12 P3 S	25559.6	14232.4	13185	13409.4	52066.4	62426.7	18173.7	19908.6	3.66919e+06	0.84	0.95	0.93	-1.03	-1.29	0.49	0.36	-7.17	1	1	1	1	1	1	1	5.51069e-06
[Similar to: 3-[(2-pyridylthio)methyl]-4,5-dihydro-1H-pyrazol-5-one; ΔMass: 22.1939 Da]	C14 H31 N O	667440	894441	999627	1.06402e+06	1.30908e+06	1.13912e+06	1.86494e+06	439828	782208	-0.42	-0.58	-0.67	-0.97	-0.77	-1.48	0.6	-0.23	1	0.999997	0.807099	0.960976	0.170211	0.656898	0.999726	1
	C15 H33 N O	123306	284762	178615	210484	274815	296376	341579	426913	276702	-1.21	-0.53	-0.77	-1.16	-1.27	-1.47	-1.79	-1.17	0.447328	1	1	1	1	0.999984	0.999929	0.99987
[Similar to: Palmitoyl sphingomyelin; ΔMass: 0.9470 Da]	C39 H70 N5 O4 P	4.55552e+06	1.13226e+06	605553	259210	6.23392e+06	6.20325e+06	6.25909e+06	7.69436e+06	3.41999e+06	2.01	2.91	4.14	-0.45	-0.45	-0.46	-0.76	0.41	0.0298783	0.0103883	0.00523512	0.995461	0.999999	0.999333	0.982987	0.996829
[Similar to: NP-003749; ΔMass: 422.5056 Da]	C52 H96 N2 P2 S	1.35574e+06	461528	458407	555554	656953	617103	395735	1.07964e+06	1.04179e+06	1.55	1.56	1.29	1.05	1.14	1.78	0.33	0.38	0.972256	0.923717	0.972907	0.99999	0.996166	0.999947	0.999985	0.999761
	C11 H21 N O	76086.8	39402.7	38348.4	57370	65084	39265.6	39543.9	46760.1	2.00881e+06	0.95	0.99	0.41	0.23	0.95	0.94	0.7	-4.72	1	1	1	1	1	1	1	7.59514e-07
		1.46352e+06	659660	323303	342949	449323	1.05978e+06	883491	1.08486e+06	1.20048e+06	1.15	2.18	2.09	1.7	0.47	0.73	0.43	0.29	0.836789	0.630833	0.625526	1	1	0.999995	1	1
	C23 H33 N10 O P	12647.3	9778.75	9668.72	9957.34	13833	13360.5	13121.7	10879	3.2193e+06	0.37	0.39	0.35	-0.13	-0.08	-0.05	0.22	-7.99	1	1	1	1	1	1	1	3.29098e-09
	C39 H66 O4	1.30738e+06	358188	275003	277665	733964	588916	641009	947449	1.48608e+06	1.87	2.25	2.24	0.83	1.15	1.03	0.46	-0.18	0.900764	0.783419	0.800663	1	0.999165	0.99884	1	0.999998
	C38 H67 N2 O3 P	1.31546e+06	1.41946e+06	1.23012e+06	1.17198e+06	1.46094e+06	1.40031e+06	1.6322e+06	1.12093e+06	2.48258e+06	-0.11	0.1	0.17	-0.15	-0.09	-0.31	0.23	-0.92	0.999999	0.998713	0.998593	1	1	1	0.998391	0.0154631
	C32 H62 N2 O4	277328	106276	121759	105924	64027.3	71018.2	46961.4	61477.5	214701	1.38	1.19	1.39	2.11	1.97	2.56	2.17	0.37	0.796199	0.999998	1	0.999996	1	0.999904	0.999843	0.998913
		1.00444e+06	347715	257616	260358	485015	487924	798375	901083	774043	1.53	1.96	1.95	1.05	1.04	0.33	0.16	0.38	0.999424	0.990289	0.999301	0.991629	0.886869	1	1	1
xanthoangelol	C25 H28 O4	641614	123194	83445.7	40456.4	993313	1.14482e+06	1.10637e+06	736791	414527	2.38	2.94	3.99	-0.63	-0.84	-0.79	-0.2	0.63	0.7324	0.589612	0.507971	0.745322	0.777538	0.854891	1	0.997955
PEG Monooleate n6	C30 H58 O8	3.28246e+06	3.1302e+06	2.72645e+06	2.74841e+06	2.20477e+06	2.36643e+06	2.09151e+06	3.1929e+06	916815	0.07	0.27	0.26	0.57	0.47	0.65	0.04	1.84	0.998492	0.423658	0.415392	0.00805281	0.00617482	0.00177319	1	5.48618e-11
	C43 H80 N7 O5 P	605960	88401.5	51471.8	47188.7	214581	160070	1.93908e+06	673979	291618	2.78	3.56	3.68	1.5	1.92	-1.68	-0.15	1.06	0.97965	0.967311	0.962459	0.997817	0.996851	0.0117652	0.9805	0.999999
[Similar to: Palmitoyl sphingomyelin; ΔMass: -5.9835 Da]	C43 H77 N4 O P	1.48831e+06	555875	365223	412954	417503	567082	734449	2.31821e+06	1.9681e+06	1.42	2.03	1.85	1.83	1.39	1.02	-0.64	-0.4	0.749226	0.306976	0.313551	0.40125	0.545372	0.913492	0.851621	0.229119
	C43 H97 N6 O5 P3 S	7.3286e+06	1.81711e+06	892776	369281	5.20591e+06	5.32496e+06	7.66246e+06	1.0375e+07	5.62439e+06	2.01	3.04	4.31	0.49	0.46	-0.06	-0.5	0.38	0.0221101	0.005661	0.00238652	0.624505	0.828961	0.999998	0.725224	0.999944
[Similar to: 2-Aminooctadec-4-yne-1,3-diol; ΔMass: 336.3391 Da]	C41 H79 N O3	911263	223884	182274	184377	547603	483002	2.61328e+06	1.19903e+06	629947	2.03	2.32	2.31	0.73	0.92	-1.52	-0.4	0.53	0.824344	0.644185	0.67603	0.990739	0.973845	8.56444e-05	0.640832	0.999431
		2.43468e+06	1.18196e+06	189400	483497	952429	609934	952313	3.51238e+06	2.81702e+06	1.04	3.68	2.33	1.35	2	1.35	-0.53	-0.21	0.999523	0.996799	0.998284	0.984186	0.943454	1	1	0.99999
[Similar to: Tetrazepam; ΔMass: -63.9715 Da]	C15 H16 N2	745536	244741	173918	161602	128479	540868	251059	878112	77349.2	1.61	2.1	2.21	2.54	0.46	1.57	-0.24	3.27	0.999922	0.948237	0.992924	0.945017	0.999999	0.999997	1	0.828583
	C22 H25 N3 O2	37844.6	37207.9	25935.1	28373.2	29563.3	31340.3	31865.2	29334	54501.6	0.02	0.55	0.42	0.36	0.27	0.25	0.37	-0.53	0.998514	0.996772	0.996883	1	0.999893	1	1	1
[Similar to: Palmitoyl sphingomyelin; ΔMass: -16.0323 Da]	C38 H75 N2 O6 P	2.62483e+06	941045	423342	254076	4.17289e+06	4.27353e+06	2.97294e+06	3.26304e+06	1.73747e+06	1.48	2.63	3.37	-0.67	-0.7	-0.18	-0.31	0.6	0.148378	0.0278164	0.0128306	0.886395	0.77799	1	1	0.982628
	C28 H39 N O7	27789.7	8033.76	7795.7	8144.43	45588.9	35116.9	28103	17752.9	3.5917e+06	1.79	1.83	1.77	-0.71	-0.34	-0.02	0.65	-7.01	1	1	1	1	1	1	1	8.40189e-07
	C38 H84 N5 O2 P	117506	119161	110976	120777	109038	93099.7	1.55005e+06	129100	146926	-0.02	0.08	-0.04	0.11	0.34	-3.72	-0.14	-0.32	1	1	1	1	1	3.71982e-06	1	1
	C19 H18 N4 S2	16866.5	13585.1	13795.6	14310.2	16551.6	16455.3	17444.4	15294.8	3.19659e+06	0.31	0.29	0.24	0.03	0.04	-0.05	0.14	-7.57	1	1	1	1	1	1	1	1.91554e-06
	C26 H48 N2 O3	305534	324212	432311	913466	269207	294089	2.71624e+06	140491	795897	-0.09	-0.5	-1.58	0.18	0.06	-3.15	1.12	-1.38	0.996634	0.999858	0.978378	0.999975	0.734339	0.036408	1	0.782119
[Similar to: 2-{6-acetyl-3-[(2-methylpropanoyl)oxy]-2,3-dihydro-1-benzofuran-2-yl}prop-2-en-1-yl 2-methylpropanoate; ΔMass: 189.1151 Da]	C33 H41 N O7	41212.5	12812.2	11763.1	10839.4	44387.3	34510.6	30606.1	34306.8	3.14263e+06	1.69	1.81	1.93	-0.11	0.26	0.43	0.26	-6.25	1	1	1	1	1	1	1	7.90468e-07
	C55 H118 N5 O5 P	1.11272e+06	593715	627614	511652	699443	875859	660283	1.19369e+06	1.14672e+06	0.91	0.83	1.12	0.67	0.35	0.75	-0.1	-0.04	0.915544	0.887461	0.855535	1	0.999797	0.999374	1	0.999646
		470215	83157.3	52721.6	62427.8	196577	124595	198632	576931	456067	2.5	3.16	2.91	1.26	1.92	1.24	-0.3	0.04	0.99633	0.987424	0.992294	0.996635	0.97791	1	1	1
	C49 H82 N3 O3 P3	3.46249e+06	236953	107646	60172.9	1.26015e+06	1.26346e+06	1.23003e+06	6.46583e+06	2.04228e+06	3.87	5.01	5.85	1.46	1.45	1.49	-0.9	0.76	0.112882	0.0672422	0.058175	0.514511	0.609639	0.993194	0.0458252	0.993742
	C38 H81 N7 O11 P2	7.59328e+06	1.32326e+06	544917	246615	4.84809e+06	4.64168e+06	3.56087e+06	9.69782e+06	5.39529e+06	2.52	3.8	4.94	0.65	0.71	1.09	-0.35	0.49	0.00573723	0.000476604	0.000222392	0.613516	0.62521	0.281558	0.366839	0.854723
	C40 H88 N5 O6 P	1.59063e+06	692476	582799	603672	950158	1.24288e+06	1.13873e+06	2.50756e+06	1.38983e+06	1.2	1.45	1.4	0.74	0.36	0.48	-0.66	0.19	0.0780638	0.0368691	0.0254382	0.451683	0.716955	0.558965	0.210164	1
	C51 H104 N2 O3 S2	1.64697e+06	1.26505e+06	1.23508e+06	1.21347e+06	1.43993e+06	1.29728e+06	1.44616e+06	2.27034e+06	1.64384e+06	0.38	0.42	0.44	0.19	0.34	0.19	-0.46	0	0.994742	0.974325	0.990607	1	1	1	0.975181	0.999955
	C28 H35 N7 O2	1.89272e+06	391065	186539	100975	2.44887e+06	2.30761e+06	1.54774e+06	1.92368e+06	971679	2.27	3.34	4.23	-0.37	-0.29	0.29	-0.02	0.96	0.0421551	0.0103365	0.00578106	0.975695	0.993804	0.997872	1	0.839212
	C23 H48 N2 O	312499	276305	368521	330816	560555	1.19062e+06	1.62584e+06	206511	3.20892e+06	0.18	-0.24	-0.08	-0.84	-1.93	-2.38	0.6	-3.36	1	1	0.999969	0.64223	0.988341	0.790773	1	0.00697904
	C51 H103 O9 P	994375	321333	247827	246384	582345	531177	535299	681830	888829	1.63	2	2.01	0.77	0.9	0.89	0.54	0.16	0.889936	0.80806	0.818205	1	0.983609	0.999921	1	1
	C43 H84 N O4 P S4	4.70502e+06	1.76203e+06	877149	374963	3.32157e+06	5.0353e+06	4.80884e+06	3.95162e+06	4.50036e+06	1.42	2.42	3.65	0.5	-0.1	-0.03	0.25	0.06	0.0548101	0.00163494	0.000104659	0.917427	0.982707	1	0.923779	0.995107
[Similar to: Palmitoyl sphingomyelin; ΔMass: 99.0565 Da]	C40 H83 N9 O5 S	6.19087e+06	1.16377e+06	433188	308731	2.79693e+06	3.38755e+06	3.84399e+06	1.1344e+07	3.95898e+06	2.41	3.84	4.33	1.15	0.87	0.69	-0.87	0.65	0.0489294	0.0153359	0.00968958	0.426137	0.564461	0.974991	0.0133586	0.999451
[Similar to: NP-013366; ΔMass: -29.8894 Da]	C31 H67 N3 O5 S	4.7457e+06	1.00442e+06	471386	177425	4.98496e+06	6.23281e+06	4.61142e+06	5.81555e+06	3.85102e+06	2.24	3.33	4.74	-0.07	-0.39	0.04	-0.29	0.3	0.0999685	0.046855	0.0301157	1	0.999971	0.999948	0.999999	0.987953
	C5 H14 N O4 P	7.59416e+06	1.35703e+06	528185	384324	4.56549e+06	4.60228e+06	7.56076e+06	1.19409e+07	4.93778e+06	2.48	3.85	4.3	0.73	0.72	0.01	-0.65	0.62	0.0490449	0.020977	0.0162199	0.574075	0.702232	1	0.56106	0.999135
[Similar to: Nervonic ceramide; ΔMass: 33.9318 Da]	C40 H75 N O7	1.33186e+06	172634	81572.9	30605.3	827697	1.13382e+06	1.30319e+06	1.97381e+06	763304	2.95	4.03	5.44	0.69	0.23	0.03	-0.57	0.8	0.130345	0.0833558	0.0681487	0.940333	0.99418	1	0.872953	0.999064
	C46 H84 N3 P	336506	88572.3	46119.5	34633	173655	342408	388362	1.07122e+06	893835	1.93	2.87	3.28	0.95	-0.03	-0.21	-1.67	-1.41	0.997434	0.994031	0.990592	0.99991	0.999983	1	0.98332	0.286663
Bethanidine	C10 H15 N3	171587	251816	124971	115626	52649.3	202831	148281	232176	396080	-0.55	0.46	0.57	1.7	-0.24	0.21	-0.44	-1.21	0.999992	0.999989	1	0.999921	1	0.999999	0.999998	0.553176
	C65 H78 O4 S	1.27206e+06	1.19563e+06	1.30358e+06	996384	1.07751e+06	953867	1.05338e+06	1.15742e+06	1.43359e+06	0.09	-0.04	0.35	0.24	0.42	0.27	0.14	-0.17	0.999992	0.995025	0.986268	0.953086	0.850215	0.954539	0.998735	0.99963
Coenzyme Q10	C59 H90 O4	807004	254749	174928	151097	320351	435859	1.22219e+06	1.57244e+06	1.23786e+06	1.66	2.21	2.42	1.33	0.89	-0.6	-0.96	-0.62	0.845123	0.687286	0.692736	0.927296	0.95565	0.928889	0.946609	0.987231
	C35 H65 N9 O6	1.15437e+07	1.29574e+07	1.91804e+07	1.28534e+07	1.11015e+07	1.29408e+07	1.21771e+07	1.06247e+07	9.79863e+06	-0.17	-0.73	-0.16	0.06	-0.16	-0.08	0.12	0.24	1	0.397036	1	0.863679	0.977599	1	1	1
[Similar to: Palmitoyl sphingomyelin; ΔMass: -16.0322 Da]	C38 H75 N2 O6 P	2.21587e+06	361600	151206	69047.6	3.49841e+06	3.93896e+06	3.39127e+06	3.74619e+06	1.43187e+06	2.62	3.87	5	-0.66	-0.83	-0.61	-0.76	0.63	0.162493	0.0973544	0.0811995	0.999998	0.99944	1	0.999998	0.982694
	C24 H41 N O5	37077.6	17887.3	19910.2	19921.2	63426	39485.2	46893.2	20598	2.41755e+06	1.05	0.9	0.9	-0.77	-0.09	-0.34	0.85	-6.03	1	1	1	1	1	1	1	6.87774e-08
[Similar to: NP-013366; ΔMass: 174.1878 Da]	C44 H80 N O9 P	2.97764e+06	562267	267852	119935	2.7694e+06	3.18766e+06	2.53974e+06	3.47806e+06	2.20198e+06	2.4	3.47	4.63	0.1	-0.1	0.23	-0.22	0.44	0.0496245	0.018197	0.01116	0.999023	1	0.99689	0.980684	0.999224
	C33 H73 N10 O3 P	299352	459891	836667	506458	303943	474544	343896	305520	333250	-0.62	-1.48	-0.76	-0.02	-0.66	-0.2	-0.03	-0.15	1	0.983873	0.996996	0.999994	0.158789	0.999963	0.999955	0.999991
	C58 H103 O2 P3	1.18004e+06	268724	168418	188460	664926	799662	745888	1.41148e+06	2.17352e+06	2.13	2.81	2.65	0.83	0.56	0.66	-0.26	-0.88	0.984171	0.904462	0.881807	0.999998	0.999999	1	0.960724	0.83854
	C35 H70 N2 O2	244125	460967	493384	455220	373166	330534	373000	272704	1.53673e+06	-0.92	-1.02	-0.9	-0.61	-0.44	-0.61	-0.16	-2.65	0.998995	1	1	0.999943	0.999842	0.999996	0.997384	0.0107957
	C28 H60 N6 O S	1.7201e+06	2.24551e+06	2.06889e+06	2.1161e+06	1.34979e+06	1.26071e+06	455440	1.24426e+06	478450	-0.38	-0.27	-0.3	0.35	0.45	1.92	0.47	1.85	0.718094	0.965875	0.834048	0.60902	0.520353	0.000676055	0.354478	8.94821e-05
	C38 H69 N5 O2 P2	40626.6	29282.4	36551.9	83995.8	36761	33183	22275.2	31171.2	26778.2	0.47	0.15	-1.05	0.14	0.29	0.87	0.38	0.6	0.898364	0.902824	0.921366	0.942968	0.999973	0.886246	0.89282	0.79672
[Similar to: Palmitoyl sphingomyelin; ΔMass: 85.0860 Da]		4.44707e+06	895649	530908	340181	4.4623e+06	5.466e+06	4.38726e+06	8.68959e+06	4.01209e+06	2.31	3.07	3.71	0	-0.3	0.02	-0.97	0.15	0.11045	0.0614529	0.0427161	0.932875	0.996306	0.963491	0.997247	0.999999
	C48 H73 N3 O9	145305	52303.9	40635.8	36303.1	101752	79520.5	3.56936e+06	268440	233084	1.47	1.84	2	0.51	0.87	-4.62	-0.89	-0.68	0.998997	0.993634	0.991876	0.999666	0.999687	1.04106e-09	1	0.999998
	C45 H76 N O P3	226855	35551.9	31838.6	33437.7	261506	237657	3.51536e+06	682732	257495	2.67	2.83	2.76	-0.21	-0.07	-3.95	-1.59	-0.18	0.994484	0.992	0.99035	0.999953	0.999971	1.43936e-08	0.999599	1
	C8 H9 N7 O3 S	11280.1	9919.64	9861.98	9706.68	12235.5	11903.7	11569.5	9460.94	50074.1	0.19	0.19	0.22	-0.12	-0.08	-0.04	0.25	-2.15	0.99871	0.994749	0.993589	0.995904	0.999998	0.998585	1	0.998041
PAF C-18:1	C28 H56 N O7 P	5.58726e+06	1.1799e+06	560552	335917	9.06082e+06	8.26217e+06	6.7257e+06	6.07943e+06	4.04142e+06	2.24	3.32	4.06	-0.7	-0.56	-0.27	-0.12	0.47	0.0460847	0.0148016	0.00843839	0.572573	0.65971	1	0.999997	0.870106
	C39 H60 N2 O5 P2	767734	175533	79974	41318.7	1.33779e+06	1.42519e+06	882267	671624	1.66048e+06	2.13	3.26	4.22	-0.8	-0.89	-0.2	0.19	-1.11	0.651574	0.474704	0.390039	0.728026	0.632255	1	1	0.0211955
	C38 H79 N7 O11 P2	4.83473e+06	1.69522e+06	1.08211e+06	557181	4.84665e+06	4.00752e+06	3.77434e+06	6.92077e+06	4.69626e+06	1.51	2.16	3.12	0	0.27	0.36	-0.52	0.04	0.0102149	6.64299e-05	7.58208e-06	0.767735	0.941858	0.459418	0.516513	0.875822
[Similar to: NP-003749; ΔMass: 464.5092 Da]	C45 H92 N10 O3 S2	2.74134e+06	390836	143654	157994	747106	558591	1.37742e+06	1.24103e+06	200800	2.81	4.25	4.12	1.88	2.3	0.99	1.14	3.77	0.0355078	0.0148584	0.0158482	0.131423	0.328201	0.810469	0.963903	0.00422863
	C35 H65 N O7	21226.5	19869.3	19877.8	21034	19944.9	20347.6	20820.4	20983.9	2.51287e+06	0.1	0.09	0.01	0.09	0.06	0.03	0.02	-6.89	1	1	1	1	1	1	1	7.47211e-07
	C15 H32 N7 O P S	8030.1	10720.4	10600.1	10735.2	8019.06	7736.8	7867.56	7321.1	812812	-0.42	-0.4	-0.42	0	0.05	0.03	0.13	-6.66	1	1	1	1	1	1	1	0.0541157
	C26 H51 N P2	374042	246192	296745	293917	247616	349873	273324	276859	354265	0.6	0.33	0.35	0.6	0.1	0.45	0.43	0.08	0.97185	0.987515	0.989967	0.999329	0.999993	0.982416	0.989099	0.986424
PEG Monooleate n7	C32 H62 O9	3.90287e+06	3.71669e+06	3.27503e+06	3.40391e+06	2.81467e+06	2.95956e+06	2.65374e+06	3.74158e+06	1.05071e+06	0.07	0.25	0.2	0.47	0.4	0.56	0.06	1.89	0.999034	0.480528	0.537246	0.0243031	0.013745	0.00410926	1	8.71903e-12
		811735	308159	243164	293600	322366	374740	451468	797594	626276	1.4	1.74	1.47	1.33	1.12	0.85	0.03	0.37	0.99314	0.98588	0.999932	0.999307	0.957451	1	1	1
	C24 H36 N9 O4 P	10181.6	7394.43	7416.62	8207.25	25235.6	27831.5	11562.4	13342.6	3.32033e+06	0.46	0.46	0.31	-1.31	-1.45	-0.18	-0.39	-8.35	1	1	1	1	1	1	1	6.92166e-07
	C32 H72 N6 P2	1.66081e+06	605371	470505	336087	503276	470395	565966	3.70795e+06	1.23544e+06	1.46	1.82	2.3	1.72	1.82	1.55	-1.16	0.43	0.354739	0.183156	0.0703512	0.213718	0.259543	0.178303	0.133065	0.999875
[Similar to: NP-013366; ΔMass: 68.1829 Da]	C33 H73 N9 O4 S	3.58037e+06	816989	415793	190222	4.27448e+06	4.28039e+06	5.7643e+06	6.04959e+06	3.235e+06	2.13	3.11	4.23	-0.26	-0.26	-0.69	-0.76	0.15	0.125799	0.0519774	0.032752	0.99889	0.999976	0.999992	0.997543	0.999773
[Similar to: N1-prop-2-ynyl-2,5-di(2,2,2-trifluoroethoxy)benzene-1-sulfonamide; ΔMass: 393.3751 Da]		205925	191000	169565	185297	141073	189877	73872.3	152873	82876.1	0.11	0.28	0.15	0.55	0.12	1.48	0.43	1.31	0.538521	1	1	0.999982	1	0.999968	0.999999	0.999598
	C60 H109 O2 P3	823857	175801	173136	144282	219096	289686	300027	700301	1.00584e+06	2.23	2.25	2.51	1.91	1.51	1.46	0.23	-0.29	0.993677	0.983556	0.992024	0.999183	0.931252	1	1	0.999793
	C48 H98 N8 S3	1.31799e+06	330387	265809	281680	637712	474520	547868	1.02251e+06	933047	2	2.31	2.23	1.05	1.47	1.27	0.37	0.5	0.960843	0.92922	0.945735	0.999854	0.991231	1	1	1
	C24 H48 N O6 P	4.70106e+06	799881	317379	52620.3	7.95144e+06	5.88636e+06	3.43165e+06	3.93998e+06	2.91137e+06	2.56	3.89	6.48	-0.76	-0.32	0.45	0.25	0.69	0.000238172	8.61531e-05	4.15476e-05	0.387209	0.962422	0.592013	0.817903	0.146863
	C52 H91 N P2	2.82975e+06	1.05807e+06	851980	631349	1.53649e+06	1.60528e+06	1.43569e+06	4.23924e+06	2.13087e+06	1.42	1.73	2.16	0.88	0.82	0.98	-0.58	0.41	0.219718	0.0964372	0.0430041	0.656235	0.803388	0.751477	0.0620417	0.999997
		969758	345569	182428	147272	643142	775937	1.92298e+06	1.59122e+06	2.1056e+06	1.49	2.41	2.72	0.59	0.32	-0.99	-0.71	-1.12	0.95712	0.858195	0.850603	0.992055	0.998691	0.999999	0.888223	0.866861
	C18 H15 N8 O6 P S2	224515	37041.5	16698	8354.1	323001	303866	142316	169948	132569	2.6	3.75	4.75	-0.52	-0.44	0.66	0.4	0.76	0.994556	0.981913	0.974395	0.999231	0.999708	0.999999	1	0.999968
	C14 H18 N2 O S	8060.25	6406.19	6173.59	6411.02	7740.3	7972.04	7766.26	8066.43	2.4269e+06	0.33	0.38	0.33	0.06	0.02	0.05	0	-8.23	1	1	1	1	1	1	1	8.94521e-07
	C54 H108 N5 O5 P	3.1156e+06	800275	712084	687377	827300	806563	2.02596e+06	3.37623e+06	2.00911e+06	1.96	2.13	2.18	1.91	1.95	0.62	-0.12	0.63	0.571143	0.286946	0.31336	0.989073	0.988854	0.999846	0.995423	0.999997
[Similar to: 2-{2-[(19-acetamido-16,18-dihydroxy-5,9-dimethyl-6-oxoicosan-7-yl)oxy]-2-oxoethyl}butanedioic acid; ΔMass: 244.2892 Da]	C46 H93 N3 O5 S2	5.56332e+06	910383	353102	122615	2.1012e+06	2.53188e+06	2.35547e+06	1.20357e+07	3.64839e+06	2.61	3.98	5.5	1.4	1.14	1.24	-1.11	0.61	0.115951	0.0521423	0.0400273	0.399661	0.566734	0.605134	0.0182767	1
1N19AGY57Y	C18 H33 N O4	1.67071e+06	367381	169843	125507	2.20168e+06	2.15899e+06	1.70583e+06	1.85582e+06	1.62458e+06	2.19	3.3	3.73	-0.4	-0.37	-0.03	-0.15	0.04	0.0869191	0.0415641	0.0253898	0.998613	0.997922	1	1	0.99819
3,6-Anhydro-1-O-stearoylhexitol	C24 H46 O6	106286	49784.9	34524.6	33734	150477	138723	104908	119717	2.53151e+06	1.09	1.62	1.66	-0.5	-0.38	0.02	-0.17	-4.57	1	1	1	1	1	1	1	0.000224081
Diisodecyl phthalate	C28 H46 O4	2.46323e+07	1.20359e+07	6.22663e+06	1.04944e+07	7.95109e+06	1.31608e+07	1.0665e+07	2.26924e+07	5.74463e+06	1.03	1.98	1.23	1.63	0.9	1.21	0.12	2.1	0.00483191	7.68914e-06	0.000255996	0.00130519	0.00840832	0.00127238	0.989132	5.68766e-08
	C46 H57 N5 O2 S	25180.6	27170.1	25103.3	25012.3	21921.5	26414.1	22675.1	27420.3	2.8647e+06	-0.11	0	0.01	0.2	-0.07	0.15	-0.12	-6.83	1	1	1	1	1	1	1	1.10086e-06
	C26 H51 N5 O5	89979.9	126255	114007	111219	114177	115935	102395	100784	120367	-0.49	-0.34	-0.31	-0.34	-0.37	-0.19	-0.16	-0.42	0.910308	0.890232	0.925891	0.922823	0.999997	0.86868	0.892153	0.843327
[Similar to: NP-013366; ΔMass: 95.1937 Da]	C39 H79 N2 O7 P	4.1043e+06	1.03502e+06	627499	223443	4.10172e+06	5.00967e+06	3.45494e+06	4.34539e+06	2.065e+06	1.99	2.71	4.2	0	-0.29	0.25	-0.08	0.99	0.0519671	0.0158694	0.00554111	0.999994	0.979372	0.999998	0.994304	0.62008
[Similar to: 2-hydroxy-3,6-diphenylcyclohexyl acetate; ΔMass: -14.9059 Da]	C18 H33 N O2	3.37276e+06	1.01734e+06	548697	367134	4.68072e+06	4.63218e+06	3.82339e+06	3.0708e+06	1.68165e+06	1.73	2.62	3.2	-0.47	-0.46	-0.18	0.14	1	0.163848	0.0615704	0.0387267	0.301348	0.85565	1	0.999993	0.517219
	C31 H53 Cl N2 O8	12665.5	11325.9	12701.4	14481	12049.8	14466.2	15523.7	11084.1	2.86367e+06	0.16	0	-0.19	0.07	-0.19	-0.29	0.19	-7.82	1	1	1	1	1	1	1	1.27107e-06
	C41 H83 N3 O3	1.52538e+06	207425	122016	127465	551069	644332	2.3088e+06	2.79091e+06	919647	2.88	3.64	3.58	1.47	1.24	-0.6	-0.87	0.73	0.436178	0.32446	0.332366	0.845224	0.893266	0.0275028	0.0264872	0.999996
[Similar to: Palmitoyl sphingomyelin; ΔMass: 97.0408 Da]	C39 H87 N5 O7 P2	1.71833e+07	5.80682e+06	5.05793e+06	4.17637e+06	1.50036e+07	1.37463e+07	1.73484e+07	4.46004e+07	1.43036e+07	1.57	1.76	2.04	0.2	0.32	-0.01	-1.38	0.26	0.128166	0.0584082	0.037508	0.627707	0.744204	0.877737	0.0882683	0.999865
	C37 H62 N4	804922	179305	126669	150928	396759	305152	270345	612132	580122	2.17	2.67	2.41	1.02	1.4	1.57	0.4	0.47	0.997552	0.992728	0.99467	0.998627	0.897329	1	1	0.999996
[Similar to: 2-(4-Methoxyphenyl)-5-{(3S)-1-[(4-methylphenyl)sulfonyl]-3-pyrrolidinyl}-1,3,4-oxadiazole; ΔMass: 163.4072 Da]	C37 H70 O3	429369	108252	34201.2	90703.9	223564	161083	149195	375107	390544	1.99	3.65	2.24	0.94	1.41	1.53	0.19	0.14	0.999641	0.998499	0.999304	0.990769	0.953152	1	1	0.999977
	C37 H78 N8 O12 P2	4.68987e+06	1.75715e+06	829341	445492	3.88316e+06	3.98991e+06	3.79988e+06	4.8343e+06	3.24651e+06	1.42	2.5	3.4	0.27	0.23	0.3	-0.04	0.53	0.0259931	1.27237e-05	1.53207e-06	0.357592	0.472073	0.752481	0.998163	0.440621
	C30 H67 N4 O4 P	1.91778e+06	134652	114716	33270.4	742870	850337	1.00459e+06	2.31698e+06	787720	3.83	4.06	5.85	1.37	1.17	0.93	-0.27	1.28	0.103193	0.0500517	0.0385612	0.866555	0.889821	0.68089	0.999998	0.872162
		1.30852e+06	322993	327525	233695	571852	439230	686539	1.78644e+06	1.40231e+06	2.02	2	2.49	1.19	1.57	0.93	-0.45	-0.1	0.999286	0.989773	0.993234	0.999068	0.966946	1	1	0.999999
	C42 H81 N O2	7.7745e+06	1.96726e+06	1.05791e+06	507589	4.29684e+06	3.87949e+06	1.28605e+07	1.19456e+07	6.45717e+06	1.98	2.88	3.94	0.86	1	-0.73	-0.62	0.27	0.437853	0.222522	0.169467	0.866811	0.953853	0.00391593	0.699265	0.999998
[Similar to: Palmitoyl sphingomyelin; ΔMass: 87.0556 Da]	C47 H79 N7 O3	9.2249e+06	1.73824e+06	617101	356817	3.72008e+06	3.69027e+06	6.16815e+06	1.34021e+07	4.93947e+06	2.41	3.9	4.69	1.31	1.32	0.58	-0.54	0.9	0.112956	0.0415251	0.0259609	0.525292	0.673939	0.987191	0.0630822	0.999441
	C31 H54 O3	2.4044e+06	3.05671e+06	3.0853e+06	3.02732e+06	1.68709e+06	1.80814e+06	1.15239e+06	1.85275e+06	499247	-0.35	-0.36	-0.33	0.51	0.41	1.06	0.38	2.27	0.651449	0.999206	0.957691	0.0273004	0.133346	0.00245242	0.377752	1.63706e-07
	C35 H51 N7 O8	13898.6	21546.9	24029.7	24848.2	24404.7	24565.4	13419.2	12777.8	4.17308e+06	-0.63	-0.79	-0.84	-0.81	-0.82	0.05	0.12	-8.23	1	1	1	1	1	1	1	2.08592e-06
[Similar to: NP-003749; ΔMass: 481.5218 Da]	C44 H95 N5 O13	3.86715e+06	1.12411e+06	610403	312884	2.03129e+06	1.89157e+06	2.9907e+06	1.1413e+07	3.77007e+06	1.78	2.66	3.63	0.93	1.03	0.37	-1.56	0.04	0.387331	0.150657	0.105548	0.639821	0.716864	0.99431	0.00169543	0.999934
[Similar to: Palmitoyl sphingomyelin; ΔMass: 70.9653 Da]	C33 H76 N9 O7 P S	2.01046e+06	333829	208085	121167	1.01025e+06	1.09564e+06	8.23737e+06	4.41062e+06	1.97613e+06	2.59	3.27	4.05	0.99	0.88	-2.03	-1.13	0.02	0.947115	0.891766	0.865056	0.996218	0.998505	0.000497196	0.986589	1
	C39 H78 N8 O12 P2	3.11239e+06	349301	228894	95108.3	1.44246e+06	1.63488e+06	1.66568e+06	6.22763e+06	2.12779e+06	3.16	3.77	5.03	1.11	0.93	0.9	-1	0.55	0.0540861	0.0239241	0.0153331	0.382268	0.687298	0.999128	0.0297203	0.987671
	C42 H79 N O5	3.48136e+06	3.34612e+06	2.83575e+06	2.85094e+06	2.29627e+06	2.30074e+06	2.06602e+06	2.84308e+06	470977	0.06	0.3	0.29	0.6	0.6	0.75	0.29	2.89	1	0.577396	0.706266	0.00539927	0.00431119	0.00144736	0.3729	1.19094e-12
	C42 H83 N O2	2.72119e+06	744273	525532	455715	1.23112e+06	1.33714e+06	2.85198e+06	3.24743e+06	1.98479e+06	1.87	2.37	2.58	1.14	1.03	-0.07	-0.26	0.46	0.655258	0.250782	0.23783	0.915438	0.987686	0.952344	0.942483	0.999825
	C35 H69 N O5 P2	52045.9	41142.6	58585.4	67082.3	45823.3	39045.3	33889.5	48318.9	44928.5	0.34	-0.17	-0.37	0.18	0.41	0.62	0.11	0.21	0.875891	0.882643	0.899026	0.924415	0.999997	0.867221	0.874736	0.781204
Phosphorylcholine	C5 H14 N O4 P	3.24151e+06	679279	326522	188374	5.33381e+06	5.71125e+06	4.46992e+06	4.72123e+06	2.5105e+06	2.25	3.31	4.1	-0.72	-0.82	-0.46	-0.54	0.37	0.109545	0.0562688	0.0398129	0.973779	0.805969	0.999999	1	0.962608
		3.24061e+06	136960	374473	23547.3	1.98466e+06	1.62392e+06	1.20121e+06	2.36781e+06	1.07474e+06	4.56	3.11	7.1	0.71	1	1.43	0.45	1.59	0.218669	0.141342	0.149875	0.999763	0.999937	0.781706	0.96684	0.92935
		5.41668e+06	1.33975e+06	802371	402459	4.56985e+06	4.58654e+06	4.33432e+06	6.11876e+06	4.24868e+06	2.02	2.76	3.75	0.25	0.24	0.32	-0.18	0.35	0.0469655	0.000575263	0.000110092	0.986824	0.999194	0.824046	0.936229	0.997406
	C41 H79 N O9 S	114278	223613	160832	217832	209486	127531	132247	112615	231494	-0.97	-0.49	-0.93	-0.87	-0.16	-0.21	0.02	-1.02	0.967989	0.931809	0.959225	0.957808	0.999953	0.917813	0.891809	0.907752
	C39 H53 N P2	12392.2	19715.9	21317.3	22897	13735.9	15706.3	13378.6	11401.6	3.70271e+06	-0.67	-0.78	-0.89	-0.15	-0.34	-0.11	0.12	-8.22	1	1	1	1	1	1	1	5.40677e-06
	C27 H28 N4 O3	15286.8	6930.72	6970.2	8046.8	32889.9	43080.1	18827	18148.2	3.46505e+06	1.14	1.13	0.93	-1.11	-1.49	-0.3	-0.25	-7.82	1	1	1	1	1	1	1	7.46567e-07
[Similar to: Tetranor-12(S)-HETE; ΔMass: 309.1366 Da]	C36 H41 N5 O2	15186.1	12388.7	12800.5	11025.7	16321.8	18658.3	15151.1	16543.4	3.87127e+06	0.29	0.25	0.46	-0.1	-0.3	0	-0.12	-7.99	1	1	1	1	1	1	1	1.09277e-06
PEG Monooleate n8	C34 H66 O10	3.12411e+06	2.95907e+06	2.66761e+06	2.84438e+06	2.39332e+06	2.46893e+06	2.36867e+06	3.05623e+06	809913	0.08	0.23	0.14	0.38	0.34	0.4	0.03	1.95	0.999985	0.677761	0.80983	0.0923579	0.0627776	0.0253249	1	1.00702e-11
1-[(11Z,14Z)]-icosadienoyl-sn-glycero-3-phosphocholine	C28 H54 N O7 P	4.01985e+06	837821	355715	233888	6.49047e+06	5.88228e+06	4.15916e+06	3.81085e+06	2.57502e+06	2.26	3.5	4.1	-0.69	-0.55	-0.05	0.08	0.64	0.0265803	0.00684078	0.00367532	0.409766	0.50299	1	1	0.831973
	C50 H92 N5 O4 P3	4.75691e+06	1.39818e+06	706608	291547	3.12522e+06	4.43367e+06	6.11346e+06	8.53119e+06	3.25471e+06	1.77	2.75	4.03	0.61	0.1	-0.36	-0.84	0.55	0.0526769	0.0157083	0.00669981	0.59982	0.972659	0.996652	0.298203	0.999996
		7558.61	6290.52	5247.05	6504.74	10641.1	8564.82	7849.85	7947.48	1.05194e+06	0.26	0.53	0.22	-0.49	-0.18	-0.05	-0.07	-7.12	1	1	1	1	1	1	1	5.83648e-07
[Similar to: NP-013366; ΔMass: 167.1524 Da]	C35 H81 N6 O5 P3 S	1.96453e+06	435539	161580	67264.5	2.94782e+06	3.24049e+06	2.26912e+06	2.75806e+06	1.50312e+06	2.17	3.6	4.87	-0.59	-0.72	-0.21	-0.49	0.39	0.0441186	0.0166904	0.0117209	0.994029	0.91283	1	1	0.946258
(2R)-1-{[(2-Aminoethoxy)(hydroxy)phosphoryl]oxy}-3-hydroxy-2-propanyl (11Z)-11-icosenoate	C25 H50 N O7 P	3.55988e+06	732702	330505	194045	5.98466e+06	5.29535e+06	3.61224e+06	3.92331e+06	2.4191e+06	2.28	3.43	4.2	-0.75	-0.57	-0.02	-0.14	0.56	0.0127679	0.00325992	0.00159543	0.401647	0.561331	1	0.999993	0.79923
	C33 H76 N10 O P2	1.64358e+06	229906	128725	60931.1	2.75362e+06	2.17901e+06	2.83474e+06	2.08337e+06	807492	2.84	3.67	4.75	-0.74	-0.41	-0.79	-0.34	1.03	0.104412	0.0509825	0.040163	0.997983	0.995785	0.944415	1	0.844154
	C33 H65 N O6	204082	159201	141580	175385	112174	188053	1.25596e+06	146118	163046	0.36	0.53	0.22	0.86	0.12	-2.62	0.48	0.32	1	1	1	0.999965	1	1.79559e-05	0.999997	0.999992
	C38 H85 N7 O11 P2	4.21272e+06	428893	286588	308724	2.00581e+06	1.90791e+06	3.2676e+06	5.70889e+06	2.10444e+06	3.3	3.88	3.77	1.07	1.14	0.37	-0.44	1	0.0289893	0.0128336	0.0127021	0.535627	0.751447	0.999964	0.204783	0.98652
nalorphine	C19 H21 N O3	901047	118337	61616.7	18946.8	501265	698108	426561	910379	467572	2.93	3.87	5.57	0.85	0.37	1.08	-0.01	0.95	0.151698	0.0893244	0.0715083	0.946777	0.954028	0.602184	0.999891	0.377996
Tomatidine	C27 H45 N O2	18746.2	19029.7	9681.03	12275.3	57088.4	39845.4	720943	17847.9	65758.6	-0.02	0.95	0.61	-1.61	-1.09	-5.27	0.07	-1.81	0.996911	0.99663	0.993811	0.99943	0.999819	0.790211	1	1
	C64 H90 S	1.78516e+06	490635	329257	387804	1.09726e+06	706345	1.18666e+06	1.48435e+06	1.99621e+06	1.86	2.44	2.2	0.7	1.34	0.59	0.27	-0.16	0.883897	0.720208	0.765755	1	1	1	0.999326	0.992456
1-(4Z,7Z,10Z,13Z,16Z,19Z-docosahexaenoyl)-sn-glycero-3-phosphocholine	C30 H50 N O7 P	1.687e+06	300560	159336	87275.4	2.50097e+06	2.23376e+06	1.5434e+06	1.64962e+06	844938	2.49	3.4	4.27	-0.57	-0.41	0.13	0.03	1	0.141708	0.0531237	0.0336258	0.79048	0.842443	1	0.999999	0.883186
	C42 H74 N2 O5	405603	184259	127587	55893	482611	394831	383698	981250	1.13449e+06	1.14	1.67	2.86	-0.25	0.04	0.08	-1.27	-1.48	0.995524	0.987186	0.974455	0.999998	0.99997	0.999999	0.994521	0.167306
	C17 H20 O4 S2	10607.5	8548.48	7536.2	7619.13	10391.5	10308.9	11261.5	9786.48	1.2494e+06	0.31	0.49	0.48	0.03	0.04	-0.09	0.12	-6.88	1	1	1	1	1	1	1	2.92434e-06
	C44 H89 N O S2	964012	1.30793e+06	1.77806e+06	1.21673e+06	1.15443e+06	1.42918e+06	931094	447582	909438	-0.44	-0.88	-0.34	-0.26	-0.57	0.05	1.11	0.08	0.999928	0.972501	0.999866	1	0.0667379	1	0.999787	0.999997
11-Aminoundecanoic acid	C11 H23 N O2	199824	131151	135683	133585	207824	195195	240614	227188	1.8275e+06	0.61	0.56	0.58	-0.06	0.03	-0.27	-0.19	-3.19	0.995368	0.986655	0.985532	0.998657	1	0.999998	0.999911	5.32728e-05
		3.29446e+06	705811	244630	158488	6.2034e+06	5.4016e+06	3.68024e+06	3.47031e+06	3.65719e+06	2.22	3.75	4.38	-0.91	-0.71	-0.16	-0.08	-0.15	0.314348	0.119043	0.102252	0.953413	0.973899	1	0.99958	1
		1.13836e+06	256258	150897	97287.4	428346	553946	1.08063e+06	1.39718e+06	1.50262e+06	2.15	2.92	3.55	1.41	1.04	0.08	-0.3	-0.4	0.816445	0.591341	0.648859	0.865248	0.999746	0.999715	0.987383	0.912409
	C39 H66 N4	568783	127449	73956.9	83631.5	250062	194183	194901	528674	444616	2.16	2.94	2.77	1.19	1.55	1.55	0.11	0.36	0.996805	0.991184	0.994065	0.998483	0.943324	1	1	0.99997
		2.02029e+06	723614	519811	558221	1.23338e+06	966557	1.50088e+06	2.48323e+06	2.13111e+06	1.48	1.96	1.86	0.71	1.06	0.43	-0.3	-0.08	0.926217	0.783232	0.814031	0.999998	0.9986	0.999998	0.991822	0.984677
	C27 H51 N O4	527932	82274.4	44153.6	48153	780266	709702	3.00896e+06	378201	319290	2.68	3.58	3.45	-0.56	-0.43	-2.51	0.48	0.73	0.953537	0.906215	0.890344	0.935459	0.978544	0.000103366	0.999999	0.999614
Leu-pro	C11 H20 N2 O3	811919	207249	114295	68587.2	358774	665722	499432	704241	249052	1.97	2.83	3.57	1.18	0.29	0.7	0.21	1.7	0.998186	0.168859	0.124032	0.994879	0.99986	0.973269	0.999999	0.377853
		321300	32880.2	31890.4	47872.4	32944.8	75683.4	47954	62399.9	161578	3.29	3.33	2.75	3.29	2.09	2.74	2.36	0.99	0.999333	0.999244	0.999658	0.983807	0.846333	1	0.999939	1
O-behenoylcarnitine	C29 H57 N O4	28324.1	22911.2	22237	21795.7	26751	32073.5	24486.5	27045.2	2.23425e+06	0.31	0.35	0.38	0.08	-0.18	0.21	0.07	-6.3	1	1	1	1	1	1	1	3.68371e-06
	C24 H39 O P3	17679.9	18210	17510.1	18105.8	17229.2	16698	17367.9	16740.7	1.15313e+06	-0.04	0.01	-0.03	0.04	0.08	0.03	0.08	-6.03	1	1	1	1	1	1	1	0.000135647
bentazepam	C17 H16 N2 O S	9941.74	8622.64	7517.85	7657.28	9469.02	10099.4	10989.9	9008.63	1.47486e+06	0.21	0.4	0.38	0.07	-0.02	-0.14	0.14	-7.21	1	1	1	1	1	1	1	9.34226e-06
[Similar to: Palmitoyl sphingomyelin; ΔMass: 106.9601 Da]	C32 H77 N9 O10 P2	3.40224e+06	2.42425e+06	1.05115e+06	585144	3.61256e+06	3.96487e+06	2.65584e+06	3.11783e+06	3.23258e+06	0.49	1.69	2.54	-0.09	-0.22	0.36	0.13	0.07	0.70723	0.00728324	0.000223707	1	0.977912	0.951078	0.999975	0.999999
	C20 H37 N O4	1.15552e+06	230212	122965	72875.5	1.55217e+06	1.4884e+06	1.36017e+06	1.00261e+06	943057	2.33	3.23	3.99	-0.43	-0.37	-0.24	0.2	0.29	0.131984	0.0618386	0.038954	0.637	0.622061	0.99995	1	0.996601
	C37 H58 N4 O	1.61601e+06	206476	176924	53827.1	1.24072e+06	1.27929e+06	839207	1.42972e+06	733434	2.97	3.19	4.91	0.38	0.34	0.95	0.18	1.14	0.310913	0.12528	0.0648781	0.999891	1	0.957096	0.999934	0.956756
	C47 H101 N6 O6 P S	752611	178669	111107	155927	360392	298252	323513	584515	575028	2.07	2.76	2.27	1.06	1.34	1.22	0.36	0.39	0.910872	0.839927	0.880268	0.999981	0.982947	0.999992	1	1
[Similar to: (3R,4R)-4-[(3,4-dimethoxyphenyl)methyl]-3-[(4-hydroxy-3-methoxyphenyl)methyl]oxolan-2-one; ΔMass: 12.2140 Da]	C23 H48 N2 O2	273582	285110	317609	245425	903048	2.14571e+06	1.57504e+06	198126	353675	-0.06	-0.22	0.16	-1.72	-2.97	-2.53	0.47	-0.37	1	1	1	0.310441	0.166999	0.206262	1	1
lysophosphatidylethanolamine (22:6(4Z,7Z,10Z,13Z,16Z,19Z)/0:0)	C27 H44 N O7 P	1.11184e+06	205434	103811	50304.4	1.45545e+06	1.37173e+06	819359	1.09756e+06	559507	2.44	3.42	4.47	-0.39	-0.3	0.44	0.02	0.99	0.316647	0.153359	0.112275	0.991623	0.99655	0.999679	1	0.974849
		1.96595e+06	693961	594149	515609	949469	885896	925120	2.62221e+06	2.07683e+06	1.5	1.73	1.93	1.05	1.15	1.09	-0.42	-0.08	0.991594	0.973904	0.97887	0.995943	0.988863	1	0.999871	0.999964
	C50 H111 N6 P3 S	372391	133115	948715	154391	160902	1.25444e+06	135330	269506	308958	1.48	-1.35	1.27	1.21	-1.75	1.46	0.47	0.27	1	0.993963	0.999919	0.984057	0.187337	1	1	1
9,12-Hexadecadienoylcarnitine	C23 H41 N O4	808036	150344	86158	45124.4	1.15749e+06	1.11046e+06	984000	826607	425345	2.43	3.23	4.16	-0.52	-0.46	-0.28	-0.03	0.93	0.397733	0.237836	0.18589	0.645734	0.753637	0.978306	0.999997	0.963835
[Similar to: NP-018915; ΔMass: 39.0084 Da]	C34 H49 N5 O4 P2	1.93039e+06	1.94599e+06	1.74406e+06	2.04228e+06	1.89461e+06	2.51243e+06	1.88229e+06	2.23102e+06	2.68763e+06	-0.01	0.15	-0.08	0.03	-0.38	0.04	-0.21	-0.48	0.999387	1	0.999762	1	0.998231	0.999706	0.312615	0.996795
		1.16861e+06	180656	177949	209883	344193	687629	1.10572e+06	1.73376e+06	1.73408e+06	2.69	2.72	2.48	1.76	0.77	0.08	-0.57	-0.57	0.96494	0.856017	0.835288	0.993807	0.999999	1	0.691113	0.760902
	C38 H79 N9 O9	2.38432e+06	634858	308395	142115	1.38835e+06	1.40473e+06	1.71315e+06	5.95294e+06	1.6381e+06	1.91	2.95	4.07	0.78	0.76	0.48	-1.32	0.54	0.296065	0.107127	0.0793894	0.750455	0.828069	0.885521	0.11327	0.985951
	C15 H33 N O	70805.5	97165.6	83826.9	159797	82851.4	188461	270701	174396	235765	-0.46	-0.24	-1.17	-0.23	-1.41	-1.93	-1.3	-1.74	0.620467	0.999999	1	0.999999	1	0.999931	0.999097	0.995057
		740909	214068	159734	73789.5	120832	145812	145652	1.13516e+06	455622	1.79	2.21	3.33	2.62	2.35	2.35	-0.62	0.7	0.496822	0.323141	0.201947	0.306414	0.393328	0.279221	0.385896	0.999842
[Similar to: NP-013366; ΔMass: 202.2202 Da]	C41 H81 N9 O4 P2	2.42978e+06	342039	164686	60385.3	1.3808e+06	1.72828e+06	1.2936e+06	2.31125e+06	1.47321e+06	2.83	3.88	5.33	0.82	0.49	0.91	0.07	0.72	0.0408255	0.0175005	0.0110426	0.693066	0.937109	0.930158	0.781728	0.979559
	C38 H82 N9 O3 P3	77496.5	140081	103605	135205	118103	97894.9	83465.2	69019.6	117380	-0.85	-0.42	-0.8	-0.61	-0.34	-0.11	0.17	-0.6	0.973201	0.93466	0.9579	0.967373	0.999863	0.933468	0.915702	0.911159
	C49 H105 N6 O7 P S	698375	177992	136687	99640.8	267055	379811	746712	1.11052e+06	1.13517e+06	1.97	2.35	2.81	1.39	0.88	-0.1	-0.67	-0.7	0.87737	0.717548	0.738869	0.999962	1	0.999999	0.982368	0.956273
		4.99562e+06	1.25529e+06	896473	848015	2.16591e+06	1.78966e+06	3.45365e+06	5.52251e+06	4.38543e+06	1.99	2.48	2.56	1.21	1.48	0.53	-0.14	0.19	0.760816	0.605819	0.49726	0.884544	0.999999	1	0.910365	0.999993
	C8 H10 N3 O8 P	9098.57	10378.6	10748.5	12669.7	7827.47	8250.76	8711.72	7650.15	912924	-0.19	-0.24	-0.48	0.22	0.14	0.06	0.25	-6.65	1	1	1	1	1	1	1	0.00851697
[Similar to: NP-013366; ΔMass: -31.9051 Da]	C32 H66 N O6 P	3.89649e+06	549804	404391	79171.1	3.70314e+06	4.0604e+06	3.63637e+06	4.85353e+06	2.59439e+06	2.83	3.27	5.62	0.07	-0.06	0.1	-0.32	0.59	0.13456	0.0633399	0.042827	0.998793	0.989153	0.999906	1	0.968686
[Similar to: 2-({[4-isopropoxy-2-(trifluoromethyl)-6-quinolyl]methyl}thio)-1H-benzo[d]imidazole; ΔMass: 64.2049 Da]	C24 H44 N5 O3 P	3.21602e+06	720376	260620	147834	3.85643e+06	3.34872e+06	2.51895e+06	2.97152e+06	1.83869e+06	2.16	3.63	4.44	-0.26	-0.06	0.35	0.11	0.81	0.00153775	0.000209134	8.80894e-05	0.997642	0.994592	0.973454	1	0.465265
	C40 H75 N O2	9.26082e+06	2.1253e+06	1.20676e+06	426862	6.29732e+06	5.84272e+06	8.9281e+06	9.02327e+06	6.46713e+06	2.12	2.94	4.44	0.56	0.66	0.05	0.04	0.52	0.080184	0.0209329	0.011669	0.915468	0.896391	0.964434	0.999786	0.989423
	C46 H95 N5 O7 P2	2.07015e+06	194903	186888	186840	442642	748632	883603	4.06886e+06	759145	3.41	3.47	3.47	2.23	1.47	1.23	-0.97	1.45	0.193768	0.101154	0.101627	0.455838	0.644124	0.958276	0.00067969	0.996227
	C32 H59 N5 S	145876	142033	174823	119152	97590.6	104294	148336	192048	481257	0.04	-0.26	0.29	0.58	0.48	-0.02	-0.4	-1.72	0.999981	0.999982	0.999689	0.997389	0.998044	0.999467	0.99996	0.386445
	C4 H12 N O6 P S	7452.75	6571.39	6869.7	6452.98	7507.44	7958.51	7075.35	6739.97	14813	0.18	0.12	0.21	-0.01	-0.09	0.07	0.15	-0.99	0.999328	0.997847	0.997013	0.999954	1	1	1	0.999999
Nortriptyline	C19 H21 N	9415.06	8632.49	7453.78	8682.83	10919.3	9283.76	9248.72	8209.1	27700.1	0.13	0.34	0.12	-0.21	0.02	0.03	0.2	-1.56	0.999985	0.999867	0.999829	0.983997	0.999866	0.999617	1	0.999995
	C24 H48 N2 O2	435308	315865	366228	302613	284878	302882	260534	270389	438155	0.46	0.25	0.52	0.61	0.52	0.74	0.69	-0.01	0.815869	1	1	1	1	0.999976	0.99997	0.994355
	C19 H38 N9 O3 P	11135.9	9581.06	8505.05	8431.22	10754.5	11067.1	12334.5	10080.6	1.33211e+06	0.22	0.39	0.4	0.05	0.01	-0.15	0.14	-6.9	1	1	1	1	1	1	1	7.69821e-05
β-D-galactosyl-(1->4)-β-D-glucosyl-(1<->1)-N-tetracosanoylsphingosine	C54 H103 N O13	466338	56928.5	47628.6	46031.6	96338.2	130375	1.2077e+06	494420	401293	3.03	3.29	3.34	2.28	1.84	-1.37	-0.08	0.22	0.972285	0.968668	0.966297	0.986229	0.994909	0.000776802	0.99742	0.999997
	C42 H88 N O7 P	1.807e+06	1.91541e+06	1.86406e+06	1.85438e+06	1.64374e+06	1.60657e+06	1.54508e+06	1.80085e+06	338052	-0.08	-0.04	-0.04	0.14	0.17	0.23	0	2.42	0.999997	0.999712	1	0.385977	0.413785	0.383941	1	1.03872e-10
1,2-di-[(9Z,12Z,15Z)-octadecatrienoyl]-sn-glycero-3-phosphocholine	C44 H76 N O8 P	3.46796e+06	597853	290068	204294	2.4695e+06	2.99505e+06	2.9615e+06	5.36319e+06	2.53957e+06	2.54	3.58	4.09	0.49	0.21	0.23	-0.63	0.45	0.100819	0.0347054	0.0256856	0.950062	0.972923	0.996467	0.836633	0.999997
[Similar to: 1-(3,4-dihydroxyphenyl)-6,7-dihydroxy-1,2-dihydronaphthalene-2,3-dicarboxylic acid; ΔMass: 317.4751 Da]	C35 H74 N5 O5 P	2.16332e+06	2.37013e+06	1.70901e+06	1.64697e+06	1.41251e+06	1.61808e+06	1.31528e+06	1.77627e+06	421146	-0.13	0.34	0.39	0.61	0.42	0.72	0.28	2.36	0.999998	0.330305	0.37119	0.162506	0.246615	0.0716447	0.852044	3.28085e-07
	C13 H24 N6 O3	1.54505e+06	1.53805e+06	1.50049e+06	1.59728e+06	1.35173e+06	1.52253e+06	1.1396e+06	1.383e+06	4.90726e+06	0.01	0.04	-0.05	0.19	0.02	0.44	0.16	-1.67	0.998048	1	1	0.999999	1	0.999995	1	0.000125515
		343824	144245	38609.8	32554.2	356013	320588	334507	1.09346e+06	632865	1.25	3.15	3.4	-0.05	0.1	0.04	-1.67	-0.88	0.99765	0.991044	0.988146	0.999981	0.99992	1	0.953174	0.579805
[Similar to: N1-[3-(2,6-dichlorophenyl)isothiazol-4-yl]-2,2-dimethylhydrazine-1-carboxamide; ΔMass: 243.2830 Da]	C35 H45 N O2 P2	10702	8818.13	8505.81	8183.17	21330.1	20400.2	11984.6	9760.28	2.91921e+06	0.28	0.33	0.39	-1	-0.93	-0.16	0.13	-8.09	1	1	1	1	1	1	1	1.02571e-06
1-[(9Z)-hexadecenoyl]-sn-glycero-3-phosphocholine	C24 H48 N O7 P	3.91398e+06	841038	339739	215479	5.61179e+06	5.87333e+06	3.66715e+06	3.23236e+06	2.38723e+06	2.22	3.53	4.18	-0.52	-0.59	0.09	0.28	0.71	0.00176673	0.000310986	0.000127179	0.420333	0.565469	0.99999	0.999999	0.559972
	C40 H77 N O2	1.23817e+07	2.87921e+06	1.10845e+06	760666	8.26253e+06	8.5963e+06	1.24577e+07	1.48867e+07	6.34919e+06	2.1	3.48	4.02	0.58	0.53	-0.01	-0.27	0.96	0.0235548	0.00412752	0.00173506	0.785738	0.96619	0.999976	0.721226	0.995556
	C38 H64 N8 O14	9338.19	6819.55	5587.16	6585.71	8719.82	8867.49	7760.74	7449.2	1.37837e+06	0.45	0.74	0.5	0.1	0.07	0.27	0.33	-7.21	1	1	1	1	1	1	1	1.51391e-05
[Similar to: NP-013366; ΔMass: 55.0724 Da]	C44 H58 N2 O4	800584	650865	655968	648209	432540	474585	587283	698918	1.07862e+06	0.3	0.29	0.3	0.89	0.75	0.45	0.2	-0.43	0.996139	0.988157	0.996988	0.826521	0.788821	0.937312	0.999393	0.754482
[Similar to: 2-Aminooctadec-4-yne-1,3-diol; ΔMass: 318.3294 Da]	C41 H77 N O2	768854	201754	182950	154841	476699	535396	2.51884e+06	1.04208e+06	662265	1.93	2.07	2.31	0.69	0.52	-1.71	-0.44	0.22	0.997192	0.919326	0.924136	0.999397	0.999276	0.00405097	0.957808	1
	C40 H79 N O2	1.67621e+06	360137	254586	245214	604021	554929	855113	1.81642e+06	945772	2.22	2.72	2.77	1.47	1.59	0.97	-0.12	0.83	0.428117	0.165676	0.149965	0.901899	0.965932	0.998939	0.555827	1
	C8 H9 N7 O2 S	9799.32	8563.04	9073.36	8390.21	11052.5	10821.9	9671.09	8622.42	45104.6	0.19	0.11	0.22	-0.17	-0.14	0.02	0.18	-2.2	0.999995	0.990832	0.989306	0.992449	0.999994	0.997545	1	0.996267
[Similar to: Palmitoyl sphingomyelin; ΔMass: 69.0383 Da]	C44 H87 N O5 P2	2.72509e+06	1.12387e+06	865617	934119	1.57438e+06	847129	1.53645e+06	5.04067e+06	1.83483e+06	1.28	1.65	1.54	0.79	1.69	0.83	-0.89	0.57	0.3909	0.125194	0.533781	0.315496	0.393593	0.577112	0.523107	0.801943
	C43 H90 N4 O9 S	856426	156540	145639	151573	205308	171315	200452	670411	564297	2.45	2.56	2.5	2.06	2.32	2.1	0.35	0.6	0.986795	0.986311	0.987347	0.998151	0.863316	1	1	1
N-Stearoyltyrosine	C27 H45 N O4	541869	107196	47716.8	26271.4	1.10816e+06	1.10187e+06	2.64833e+06	503813	312077	2.34	3.51	4.37	-1.03	-1.02	-2.29	0.11	0.8	0.586349	0.423386	0.361996	0.523497	0.781753	7.45356e-10	0.999999	0.993199
	C34 H37 N5 O2	13449.1	10593	10679.3	10458.6	14420.1	13876.4	14596.9	12778.9	2.42724e+06	0.34	0.33	0.36	-0.1	-0.05	-0.12	0.07	-7.5	1	1	1	1	1	1	1	1.05509e-06
	C42 H86 N8 O3 P2	321827	68692.3	78831	82252.8	62248.4	86776	90270.7	131237	147479	2.23	2.03	1.97	2.37	1.89	1.83	1.29	1.13	0.999671	0.999599	0.999627	0.95976	0.735316	1	0.999996	1
		1.70585e+06	308806	175611	209892	624106	881554	694093	1.97525e+06	2.01728e+06	2.47	3.28	3.02	1.45	0.95	1.3	-0.21	-0.24	0.588702	0.4723	0.489767	0.990458	1	0.992311	1	0.99076
	C42 H83 N O8 P2	61922.6	64788	83894.1	78928	75372.4	67559.3	56207.2	74546.8	131689	-0.07	-0.44	-0.35	-0.28	-0.13	0.14	-0.27	-1.09	0.967462	0.974455	0.967107	1	0.999934	0.964889	0.96462	0.964789
[Similar to: 1-{[5-(hydroxymethyl)-2,5,8a-trimethyl-1,4,4a,5,6,7,8,8a-octahydronaphthalen-1-yl]methyl}-4-methylidene-7-oxabicyclo[4.1.0]heptane-2,3,5-triol; ΔMass: 601.6151 Da]		513671	187681	113759	56759.5	108359	257593	162360	648481	519258	1.45	2.17	3.18	2.25	1	1.66	-0.34	-0.02	0.998846	0.997375	0.996058	0.999365	0.969311	1	1	0.999995
	C30 H72 N9 O9 P	28104.1	19963.4	30295.7	46510.6	21721.4	26303.6	12352.1	21812.9	20633.1	0.49	-0.11	-0.73	0.37	0.1	1.19	0.37	0.45	0.902638	0.909301	0.916347	0.943067	0.999968	0.891988	0.90007	0.808906
	C24 H47 N5 O4	316581	413070	1.44318e+06	412402	291310	300988	261640	302397	316008	-0.38	-2.19	-0.38	0.12	0.07	0.27	0.07	0	0.999998	0.99938	0.999944	0.987372	0.999998	0.975728	0.985436	0.999712
		275199	138070	87660.2	96978	199125	153930	148042	326008	330674	1	1.65	1.5	0.47	0.84	0.89	-0.24	-0.26	0.999943	0.999702	0.9998	0.98107	0.949034	1	1	0.999961
[Similar to: 5-[(1S,3aR,4S,6aR)-4-(3,4,5-trimethoxyphenyl)-hexahydrofuro[3,4-c]furan-1-yl]-2H-1,3-benzodioxole; ΔMass: 111.1750 Da]	C24 H50 N O8 P	2.57435e+06	58184.3	12044.4	11802.8	3.10614e+06	3.22963e+06	2.0265e+06	2.45478e+06	1.55498e+06	5.47	7.74	7.77	-0.27	-0.33	0.35	0.07	0.73	0.0604688	0.0523796	0.0523562	0.994193	0.995864	0.999237	1	1
	C40 H80 N2 O2	316910	417940	290915	304027	343241	317070	423379	268681	1.41686e+06	-0.4	0.12	0.06	-0.12	0	-0.42	0.24	-2.16	1	1	0.999988	0.999953	0.999312	0.999833	0.999167	0.00337694
	C56 H120 N5 O5 P	583404	185709	54088.5	163616	200801	262962	218599	506004	411545	1.65	3.43	1.83	1.54	1.15	1.42	0.21	0.5	0.998945	0.995562	0.998819	0.994305	0.609091	1	1	1
[Similar to: NP-003749; ΔMass: 433.5207 Da]	C44 H97 N5 O6 P2	3.99124e+06	1.35678e+06	235569	299464	1.07063e+06	1.85288e+06	3.29877e+06	8.34426e+06	2.24218e+06	1.56	4.08	3.74	1.9	1.11	0.27	-1.06	0.83	0.842551	0.620757	0.626683	0.884209	0.986047	0.999421	0.0747157	1
	C38 H69 N5 O2	473552	592616	770901	519402	496415	665382	463471	297630	488197	-0.32	-0.7	-0.13	-0.07	-0.49	0.03	0.67	-0.04	1	0.754122	0.99984	1	0.331072	0.999999	0.999626	1
Testosterone cypionate	C27 H40 O3	2.04175e+06	315047	201861	72457.9	3.97475e+06	3.75356e+06	2.50322e+06	1.77173e+06	934927	2.7	3.34	4.82	-0.96	-0.88	-0.29	0.2	1.13	0.00554993	0.00219159	0.00108716	0.503834	0.547998	1	0.959053	0.196291
[Similar to: 1,3-dihydroxy-1-(7-methoxy-2-oxo-2H-chromen-6-yl)-3-methylbutan-2-yl 3-methylbutanoate; ΔMass: 213.1518 Da]	C36 H41 N5 O3	32646.2	14159.1	12406.7	11010.3	41134.3	40876.7	32128.8	40758.2	3.11062e+06	1.21	1.4	1.57	-0.33	-0.32	0.02	-0.32	-6.57	1	1	1	1	1	1	1	2.32702e-06
	C29 H57 N O6	238755	245020	242450	189878	184830	265867	1.64651e+06	206699	152227	-0.04	-0.02	0.33	0.37	-0.16	-2.79	0.21	0.65	1	1	1	0.999992	1	2.50377e-05	1	0.999898
	C21 H25 O2 P	6844.78	7163.24	5415.47	6418.64	6839.47	7991.07	7501.29	6124.75	41097.6	-0.07	0.34	0.09	0	-0.22	-0.13	0.16	-2.59	0.997955	0.996547	0.995203	1	1	0.999999	1	0.999994
	C56 H71 N O5	7884.17	6418.8	5559.71	6344.53	7735.49	8461.99	8021.44	6372.23	985613	0.3	0.5	0.31	0.03	-0.1	-0.02	0.31	-6.97	1	1	1	1	1	1	1	1.70999e-05
[Similar to: NP-003749; ΔMass: 431.5047 Da]	C52 H89 N3 O6	3.29412e+06	785901	462536	289226	1.31294e+06	1.34264e+06	2.32289e+06	6.63181e+06	2.127e+06	2.07	2.83	3.51	1.33	1.29	0.5	-1.01	0.63	0.111209	0.0612789	0.0498244	0.633724	0.313144	0.793038	0.658219	0.920597
	C35 H71 N O4 P2	62211.6	32900.6	26675.8	27166.2	48462.4	55749.5	53939.4	65626.3	503071	0.92	1.22	1.2	0.36	0.16	0.21	-0.08	-3.02	0.999984	0.999969	0.999815	0.999483	0.999483	0.999694	0.999707	0.395792
		1.73769e+06	605068	298160	301515	763041	890184	1.16823e+06	1.88492e+06	1.79578e+06	1.52	2.54	2.53	1.19	0.96	0.57	-0.12	-0.05	0.645202	0.322908	0.370034	0.999531	1	0.99989	0.999509	0.999819
METIPRANOLOL	C17 H27 N O4	2.28771e+06	392611	240600	126309	1.65382e+06	1.79003e+06	2.16678e+06	2.21429e+06	1.31073e+06	2.54	3.25	4.18	0.47	0.35	0.08	0.05	0.8	0.0061935	0.000691292	0.000319473	1	1	0.999069	1	0.968642
	C39 H71 N5 O2	1.90321e+06	269446	325232	51088.3	1.00971e+06	817677	859155	1.58241e+06	601934	2.82	2.55	5.22	0.91	1.22	1.15	0.27	1.66	0.748452	0.498578	0.365445	0.999958	0.999941	0.962733	0.999684	0.983023
		1.71476e+06	487430	400077	214318	602167	888801	1.33507e+06	1.91989e+06	1.66003e+06	1.81	2.1	3	1.51	0.95	0.36	-0.16	0.05	0.918854	0.787872	0.784164	0.999999	1	0.999939	1	0.999999
meprednisone	C22 H28 O5	520318	108330	66425.8	32517.8	818857	945188	943093	613321	362879	2.26	2.97	4	-0.65	-0.86	-0.86	-0.24	0.52	0.772489	0.631259	0.551776	0.728816	0.738233	0.827398	1	0.999751
	C37 H63 N10 O P3	6701.91	6797.01	5084.2	6244.78	6297.35	7310.9	7286.33	8549.47	959636	-0.02	0.4	0.1	0.09	-0.13	-0.12	-0.35	-7.16	1	1	1	1	1	1	1	6.42962e-06
	C36 H58 N O P	757899	300271	198330	127526	288665	598076	302800	2.07461e+06	1.11733e+06	1.34	1.93	2.57	1.39	0.34	1.32	-1.45	-0.56	0.874109	0.759894	0.700767	0.9814	0.99358	0.94631	0.507984	0.865907
	C26 H35 N O7	11645.1	7134.45	7162.67	8698.12	29336.6	9593.12	13907	8469.31	2.38075e+06	0.71	0.7	0.42	-1.33	0.28	-0.26	0.46	-7.68	1	1	1	1	1	1	1	4.74212e-07
	C38 H58 N6 O9	57326.5	56237.1	40349.4	42526.5	44497	56397.2	43659.2	64218.8	1.67845e+06	0.03	0.51	0.43	0.37	0.02	0.39	-0.16	-4.87	1	1	1	1	1	1	1	1.03305e-07
Triundecanoin	C36 H68 O6	1.81209e+06	273648	293012	59683.8	1.00267e+06	947059	805636	1.38524e+06	614783	2.73	2.63	4.92	0.85	0.94	1.17	0.39	1.56	0.682762	0.412847	0.295619	0.999837	0.999748	0.953456	0.998182	0.97768
	C57 H104 N5 O5 P	558153	127711	122295	146484	140995	362559	793890	1.01976e+06	1.22015e+06	2.13	2.19	1.93	1.99	0.62	-0.51	-0.87	-1.13	0.977032	0.899127	0.907257	0.990635	0.999858	0.999999	0.967449	0.821899
[Similar to: NP-003749; ΔMass: 445.4846 Da]	C44 H93 N5 O7 P2	4.35989e+06	672500	395765	351062	2.38925e+06	1.88943e+06	1.96672e+06	1.03748e+07	4.33683e+06	2.7	3.46	3.63	0.87	1.21	1.15	-1.25	0.01	0.140917	0.040995	0.0364924	0.538936	0.676033	0.952886	0.00113882	1
	C47 H74 N7 O8 P	2.70379e+06	353273	242160	120254	1.61739e+06	1.52364e+06	1.30525e+06	4.80413e+06	1.40424e+06	2.94	3.48	4.49	0.74	0.83	1.05	-0.83	0.95	0.0185583	0.00454331	0.00240806	0.412609	0.687947	0.733185	0.0474605	0.937516
LysoPC(22:4(7Z,10Z,13Z,16Z))	C30 H54 N O7 P	2.07892e+06	483644	181974	106312	4.19183e+06	3.96248e+06	2.14059e+06	2.18953e+06	1.28105e+06	2.1	3.51	4.29	-1.01	-0.93	-0.04	-0.07	0.7	0.312246	0.167292	0.126734	0.318727	0.506254	0.999644	1	0.986517
	C21 H44 N5 O P	314006	62404.5	19247.3	6630.92	671327	508536	309670	240124	204251	2.33	4.03	5.57	-1.1	-0.7	0.02	0.39	0.62	0.999576	0.999438	0.998013	0.713979	0.71608	1	1	0.999931
	C19 H17 Cl O10 S	7108.78	6420.06	6144.44	7259.98	6695.83	6755.24	7660.33	5715.45	16031.9	0.15	0.21	-0.03	0.09	0.07	-0.11	0.31	-1.17	0.998495	0.997278	0.995751	0.999906	1	1	1	0.99983
	C31 H61 N O6	294106	210019	247899	254978	176630	238014	1.66239e+06	283735	189300	0.49	0.25	0.21	0.74	0.31	-2.5	0.05	0.64	0.999961	1	1	0.999958	0.999997	1.40492e-05	1	0.99982
[Similar to: NP-003749; ΔMass: 433.3908 Da]	C52 H75 N3 O7	2.13727e+06	328446	205097	110496	1.26172e+06	1.24768e+06	1.13608e+06	3.8262e+06	1.41976e+06	2.7	3.38	4.27	0.76	0.78	0.91	-0.84	0.59	0.0390196	0.00918473	0.0052634	0.705618	0.853618	0.991209	0.00932799	0.989153
Ceramide (d18:1/25:0)	C43 H85 N O3	1.20281e+06	363584	222863	155877	499833	663055	1.81501e+06	3.3485e+06	1.20706e+06	1.73	2.43	2.95	1.27	0.86	-0.59	-1.48	-0.01	0.748255	0.547999	0.481441	0.920467	0.960734	0.851033	0.0369787	0.988123
	C48 H84 N2 P2	31609.2	27417.3	25806	28382.1	27179.6	29102.7	29938.3	27456.6	2.37195e+06	0.21	0.29	0.16	0.22	0.12	0.08	0.2	-6.23	1	1	1	1	1	1	1	1.49464e-06
	C57 H94 N6 O3	720424	221587	130374	159615	347472	277597	279235	653090	523872	1.7	2.47	2.17	1.05	1.38	1.37	0.14	0.46	0.9877	0.966851	0.976346	0.999779	0.966965	1	1	1
	C39 H71 N5 O2	2.57822e+06	359057	394753	89382.8	1.68384e+06	1.56465e+06	1.22516e+06	2.19594e+06	689772	2.84	2.71	4.85	0.61	0.72	1.07	0.23	1.9	0.54804	0.319752	0.219773	0.999943	0.999999	0.936312	0.998501	0.905804
	C43 H70 N9 O6 P	3.97629e+06	2.51832e+06	1.00132e+06	449872	4.73123e+06	4.65556e+06	3.81533e+06	1.52867e+06	3.76393e+06	0.66	1.99	3.14	-0.25	-0.23	0.06	1.38	0.08	0.870194	0.109413	0.0126062	0.998105	0.883978	0.984524	0.781094	1
[Similar to: NP-022470; ΔMass: 263.2677 Da]	C30 H59 N5 O7	69551.5	56612.2	72691.8	84506.8	49857.3	56631.2	34444	44834.5	36748.4	0.3	-0.06	-0.28	0.48	0.3	1.01	0.63	0.92	0.870599	0.882838	0.90187	0.915207	0.999998	0.856048	0.87527	0.746616
(2R)-1-(Icosanoyloxy)-3-(phosphonooxy)-2-propanyl (15Z)-15-tetracosenoate	C47 H91 O8 P	310296	184410	179829	166209	201433	132188	52678	238139	233941	0.75	0.79	0.9	0.62	1.23	2.56	0.38	0.41	0.999846	0.999727	0.999819	0.952597	0.871871	1	0.999984	0.999997
	C29 H57 N5 O6	355241	282396	296126	354792	379391	290216	327194	231214	584014	0.33	0.26	0	-0.09	0.29	0.12	0.62	-0.72	0.959403	0.959851	0.969747	1	0.999985	0.963731	0.953817	0.975636
	C50 H102 N4 O4 S3	3.28137e+06	1.28967e+06	719377	787194	1.94306e+06	1.8615e+06	2.02752e+06	2.50418e+06	2.36798e+06	1.35	2.19	2.06	0.76	0.82	0.69	0.39	0.47	0.912993	0.787741	0.813711	0.999667	0.988632	0.999973	1	1
	C51 H101 O2 P3	2.11746e+06	897422	837871	784678	1.10966e+06	1.02177e+06	1.02447e+06	1.60787e+06	1.63857e+06	1.24	1.34	1.43	0.93	1.05	1.05	0.4	0.37	0.987305	0.972835	0.973052	0.99894	0.93772	0.999993	1	1
		960038	349604	256823	247157	504128	309037	548383	875065	871854	1.46	1.9	1.96	0.93	1.64	0.81	0.13	0.14	0.999655	0.992835	0.989849	0.99426	0.896603	0.999999	1	1
Lidocaine	C14 H22 N2 O	597042	69742.4	88927.5	65861	334377	458176	536023	1.40775e+06	172522	3.1	2.75	3.18	0.84	0.38	0.16	-1.24	1.79	1	0.932373	0.980446	0.993769	1	0.995586	0.981095	0.940741
	C63 H96 O S	3.64748e+06	822046	497075	620693	1.22267e+06	1.2377e+06	2.6158e+06	4.52856e+06	4.05613e+06	2.15	2.88	2.55	1.58	1.56	0.48	-0.31	-0.15	0.954681	0.840322	0.854925	1	0.999998	1	0.997688	0.993466
[Similar to: 3-(2-bromo-5-methoxyphenyl)-2-[2-(4-fluorophenyl)hydrazono]-3-oxopropanenitrile; ΔMass: 240.4535 Da]	C34 H67 N O4 P2	457947	310442	327342	320656	313669	261984	266888	261800	584822	0.56	0.48	0.51	0.55	0.81	0.78	0.81	-0.35	0.940919	0.962371	0.945513	1	0.999999	0.926553	0.930182	0.960677
		1.95564e+06	793571	1.14942e+06	834600	1.58478e+06	1.25022e+06	1.55986e+06	2.13384e+06	1.63211e+06	1.3	0.77	1.23	0.3	0.65	0.33	-0.13	0.26	0.937619	0.978926	0.972248	0.999999	1	1	0.996157	0.999959
		4.9024e+06	1.60492e+06	980204	593580	2.71489e+06	2.31262e+06	2.43515e+06	3.81454e+06	4.01869e+06	1.61	2.32	3.05	0.85	1.08	1.01	0.36	0.29	0.872835	0.782496	0.778479	0.999959	0.952704	0.999915	0.999728	0.999494
		3.50253e+06	2.33679e+06	1.42024e+06	2.2996e+06	1.94664e+06	2.62778e+06	1.99929e+06	3.02584e+06	2.98129e+06	0.58	1.3	0.61	0.85	0.41	0.81	0.21	0.23	0.985671	0.922344	0.993747	0.999553	0.99613	1	0.999979	0.999712
[Similar to: Palmitoyl sphingomyelin; ΔMass: -131.2403 Da]	C30 H46 N5 O4 P	1.82221e+06	750684	618089	572680	1.29e+06	1.56721e+06	1.67375e+06	3.03698e+06	4.00474e+06	1.28	1.56	1.67	0.5	0.22	0.12	-0.74	-1.14	0.971104	0.941776	0.932695	0.996156	0.999474	0.997333	0.999987	0.245238
	C46 H72 N5 O4 P	1.28016e+06	98180.4	45632.9	33671.1	578120	437481	3.50036e+06	1.22729e+06	837719	3.7	4.81	5.25	1.15	1.55	-1.45	0.06	0.61	0.933365	0.858852	0.845642	0.99805	0.996416	0.000985254	0.999834	0.999971
	C38 H58 N6 O5	21171.7	19470.2	19240	20023.2	21578.8	21301.4	20982	21341.2	3.45586e+06	0.12	0.14	0.08	-0.03	-0.01	0.01	-0.01	-7.35	1	1	1	1	1	1	1	4.95222e-07
	C47 H98 N8 S3	3.87815e+06	1.45064e+06	1.2346e+06	1.35439e+06	2.06073e+06	1.87402e+06	2.16089e+06	3.22005e+06	2.67591e+06	1.42	1.65	1.52	0.91	1.05	0.84	0.27	0.54	0.90701	0.764529	0.844056	0.999999	1	1	1	0.999985
C14-Carnitine	C21 H41 N O4	2.89906e+06	537632	282383	156495	4.19914e+06	3.87336e+06	5.7731e+06	2.25749e+06	1.65029e+06	2.43	3.36	4.21	-0.53	-0.42	-0.99	0.36	0.81	0.45917	0.297108	0.226617	0.638504	0.745747	0.0777774	0.999994	0.990205
		1.50356e+07	2.83882e+06	1.72112e+06	1.13206e+06	7.75984e+06	8.17895e+06	1.23439e+07	2.04515e+07	1.20626e+07	2.41	3.13	3.73	0.95	0.88	0.28	-0.44	0.32	0.104806	0.0414581	0.0286269	0.707859	0.864968	0.98081	0.460859	0.999993
	C30 H65 N4 O3 P	3.04415e+06	265815	213365	42783.1	1.76472e+06	2.20286e+06	2.34621e+06	4.28554e+06	1.42433e+06	3.52	3.83	6.15	0.79	0.47	0.38	-0.49	1.1	0.198098	0.119862	0.100977	0.952045	0.969348	0.796088	0.999982	0.883999
	C34 H62 N6 O4	3.55794e+06	437871	531062	222180	2.22647e+06	2.25102e+06	1.61962e+06	2.82519e+06	1.12333e+06	3.02	2.74	4	0.68	0.66	1.14	0.33	1.66	0.425404	0.228579	0.164673	0.999999	0.999992	0.925656	0.988366	0.93235
	C46 H97 N3 O3 P2 S	3.62926e+06	552726	314722	117775	1.10079e+06	1.36649e+06	1.55824e+06	6.78108e+06	2.31662e+06	2.72	3.53	4.95	1.72	1.41	1.22	-0.9	0.65	0.296699	0.179224	0.146725	0.569233	0.684016	0.763937	0.00679096	1
	C16 H32 N2	270209	145222	421000	976192	153952	239698	92087.5	106963	154844	0.9	-0.64	-1.85	0.81	0.17	1.55	1.34	0.8	1	0.999995	0.997721	1	1	0.999998	0.626363	1
	C36 H58 O9 P2	508895	486383	422324	503680	317017	409296	234601	421287	235357	0.07	0.27	0.01	0.68	0.31	1.12	0.27	1.11	0.609104	1	1	0.999534	0.999954	0.999739	0.999999	0.996494
		9.84906e+06	2.97617e+06	1.75601e+06	1.09036e+06	8.93085e+06	8.36664e+06	9.47727e+06	1.74755e+07	9.24801e+06	1.73	2.49	3.18	0.14	0.24	0.06	-0.83	0.09	0.00697428	0.000634332	0.000169611	0.650413	0.877396	0.862431	0.597801	0.983914
	C62 H117 N O6	1.09265e+06	356766	189749	227575	561346	399525	501817	1.13241e+06	915531	1.61	2.53	2.26	0.96	1.45	1.12	-0.05	0.26	0.993082	0.985771	0.993932	0.992786	0.921327	1	1	1
	C39 H85 N5 O6 P2	8.65625e+06	2.26554e+06	1.76058e+06	885765	6.37747e+06	6.11535e+06	1.01961e+07	2.25042e+07	6.55305e+06	1.93	2.3	3.29	0.44	0.5	-0.24	-1.38	0.4	0.0789356	0.0293152	0.0159163	0.54731	0.789519	1	0.0404342	0.99576
[Similar to: methyl 2,5-dimethyl-4-({[1-methyl-4-phenyl-3-(trifluoromethyl)-1H-pyrazol-5-yl]amino}sulfonyl)-3-furoate; ΔMass: 24.2616 Da]	C27 H43 N7 O	1.40572e+07	2.4851e+06	1.17828e+06	570458	1.6982e+07	1.83636e+07	1.53299e+07	1.24949e+07	7.62381e+06	2.5	3.58	4.62	-0.27	-0.39	-0.13	0.17	0.88	0.00150301	0.000289436	0.000108637	0.270305	0.245707	0.97862	1	0.581013
[Similar to: NP-003749; ΔMass: 431.5051 Da]	C44 H95 N5 O6 P2	9.91897e+06	2.1347e+06	1.39838e+06	538111	4.11307e+06	4.32765e+06	6.13284e+06	2.14281e+07	7.60972e+06	2.22	2.83	4.2	1.27	1.2	0.69	-1.11	0.38	0.118916	0.0305143	0.0168409	0.39009	0.456972	0.989642	0.000100478	1
[Similar to: (1R,2R,4S,16R,17R,20S)-2-hydroxy-13,20-dimethoxy-4,7,17,22,22-pentamethyl-5,10,21,23-tetraoxahexacyclo[18.2.1.0Âa,Âaâ·.0â´,Âaâ¶.0â¶,Âaâ´.0â¸,ÂaÂ?]tricosa-6,8(12),13-trien-11-one; ΔMass: 185.2565 Da]	C33 H65 N5 O8	328237	200003	197241	246296	232832	208769	212756	191367	408411	0.71	0.73	0.41	0.5	0.65	0.63	0.78	-0.32	0.925881	0.928805	0.933736	1	0.999999	0.927297	0.920014	0.941796
[Similar to: NP-013366; ΔMass: 156.2135 Da]	C41 H78 N7 O5 P	1.52175e+06	314143	174119	58016.7	865785	859654	3.64751e+06	3.71704e+06	1.92535e+06	2.28	3.13	4.71	0.81	0.82	-1.26	-1.29	-0.34	0.675055	0.477911	0.403034	0.875747	0.924475	0.285391	0.459481	0.999997
	C29 H55 N O3	21255.3	20791.4	20998.6	21805.1	20185.4	20193.7	21123.5	19996.4	3.05271e+06	0.03	0.02	-0.04	0.07	0.07	0.01	0.09	-7.17	1	1	1	1	1	1	1	0.000287557
		4.57137e+06	1.54544e+06	1.02294e+06	1.10215e+06	2.50771e+06	1.39496e+06	1.84995e+06	3.30974e+06	3.61977e+06	1.56	2.16	2.05	0.87	1.71	1.31	0.47	0.34	0.956234	0.898999	0.907639	0.99936	0.984166	0.999993	1	1
	C35 H23 N8 O10 P3	3.85797e+06	208403	120880	80867.7	2.46689e+06	1.75081e+06	2.66113e+06	1.00117e+07	2.74893e+06	4.21	5	5.58	0.65	1.14	0.54	-1.38	0.49	0.160395	0.104977	0.0989552	0.831142	0.872941	0.97236	0.373122	0.999931
9-Decenoylcarnitine	C17 H31 N O4	3.37225e+06	1.04993e+06	376214	246870	3.99401e+06	4.02604e+06	3.71405e+06	3.06621e+06	2.37304e+06	1.68	3.16	3.77	-0.24	-0.26	-0.14	0.14	0.51	0.183234	0.0781696	0.0510963	1	1	1	1	0.999946
	C14 H29 N O2	219560	3.44552e+06	4.03248e+06	4.23555e+06	226258	243241	203427	198154	271567	-3.97	-4.2	-4.27	-0.04	-0.15	0.11	0.15	-0.31	2.05758e-12	8.16902e-13	8.17679e-13	1	1	1	1	1
		3.71558e+06	166079	118728	159922	801865	302142	438019	1.99539e+06	1.32752e+06	4.48	4.97	4.54	2.21	3.62	3.08	0.9	1.48	0.992997	0.98979	0.993213	0.992576	0.960282	1	1	1
	C22 H43 N4 O4 P3	641835	656798	530494	636983	485388	620856	307550	615940	395289	-0.03	0.27	0.01	0.4	0.05	1.06	0.06	0.7	0.68317	0.999984	1	0.998592	0.99968	0.996367	1	0.991056
N-[(13Z)-docosenoyl]sphingosine	C40 H77 N O3	1.49621e+06	302008	130627	63091.6	715870	687966	3.44062e+06	2.31232e+06	952090	2.31	3.52	4.57	1.06	1.12	-1.2	-0.63	0.65	0.929635	0.863844	0.832171	0.995933	0.998062	0.000498951	0.555233	1
	C24 H32 Cl N O5	7589.99	7664.35	7006.28	7779.36	8347.69	8070.77	7459.63	6720.8	2.87736e+06	-0.01	0.12	-0.04	-0.14	-0.09	0.02	0.18	-8.57	1	1	1	1	1	1	1	3.02749e-05
C26:1 Sphingomyelin (d18:1/26:1(17Z))	C49 H97 N2 O6 P	7.82787e+06	1.31359e+06	898302	806880	3.05893e+06	3.68153e+06	1.39618e+07	1.04407e+07	6.79379e+06	2.58	3.12	3.28	1.36	1.09	-0.83	-0.42	0.2	0.797238	0.620661	0.610324	0.984378	0.999993	0.0065835	0.977703	0.999982
	C13 H29 N O3	71165.2	41824.8	28017.3	32204.4	41326.5	50802.6	42597.9	46045.9	2.80708e+06	0.77	1.34	1.14	0.78	0.49	0.74	0.63	-5.3	1	1	1	1	1	1	1	5.57593e-06
	C46 H82 N3 O5 P3	1.28574e+07	5.87919e+06	2.31118e+06	1.23322e+06	1.18591e+07	1.29552e+07	1.2785e+07	1.21093e+07	1.06406e+07	1.13	2.48	3.38	0.12	-0.01	0.01	0.09	0.27	0.00111256	2.33024e-06	2.06658e-07	0.870429	0.99993	0.999822	1	0.797754
[Similar to: (2R,3R,4R,5R,6S)-2-{[(2R,3S,4S,5R,6R)-6-(benzyloxy)-3,4,5-trihydroxyoxan-2-yl]methoxy}-6-methyloxane-3,4,5-triol; ΔMass: 111.2357 Da]	C27 H53 N5 O5	498408	281489	285464	312034	366731	376950	296170	275659	509433	0.82	0.8	0.68	0.44	0.4	0.75	0.85	-0.03	0.955553	0.964898	0.971723	1	0.999995	0.965518	0.961266	0.975158
[Similar to: NP-003749; ΔMass: 443.4690 Da]	C44 H91 N5 O7 P2	1.12381e+07	1.6566e+06	985654	678418	4.70913e+06	4.09886e+06	4.56534e+06	1.90194e+07	6.46458e+06	2.76	3.51	4.05	1.25	1.46	1.3	-0.76	0.8	0.0366955	0.00802537	0.00618327	0.358662	0.444641	0.72789	0.000928251	0.99568
		5.17643e+06	1.05663e+06	954332	828797	1.9809e+06	2.04286e+06	3.56902e+06	5.76311e+06	7.02978e+06	2.29	2.44	2.64	1.39	1.34	0.54	-0.15	-0.44	0.876489	0.709906	0.737339	0.999986	1	0.999998	0.996881	0.9752
[Similar to: 1-[(5-methyl-3-phenylisoxazol-4-yl)carbonyl]-1,2,3,4,6,10b-hexahydropyrimido[2,1-a]isoindol-6-one; ΔMass: 228.4380 Da]	C34 H76 N5 O P	1.35551e+06	279743	155673	121118	573918	603261	3.28006e+06	2.0614e+06	920469	2.28	3.12	3.48	1.24	1.17	-1.27	-0.6	0.56	0.97476	0.983688	0.901193	0.997193	0.998576	0.000636719	0.708963	1
	C41 H81 N O6	1.64254e+06	1.27587e+06	1.6833e+06	1.11865e+06	1.19603e+06	1.42323e+06	1.18199e+06	1.25726e+06	1.11685e+06	0.36	-0.04	0.55	0.46	0.21	0.47	0.39	0.56	0.999297	1	0.99995	0.99358	0.258695	0.997962	0.998402	0.994908
LysoPC(P-18:0)	C26 H54 N O6 P	1.23585e+07	2.17353e+06	1.24174e+06	518400	1.62795e+07	1.64702e+07	1.48487e+07	1.35291e+07	7.60514e+06	2.51	3.32	4.58	-0.4	-0.41	-0.26	-0.13	0.7	0.00428627	0.000935033	0.00040967	0.259578	0.289666	0.993379	1	0.798785
	C43 H78 N O6 P S	60392.4	62583.3	45003.7	49617.4	51678.1	54228.2	54200.4	49632.2	4.96055e+06	-0.05	0.42	0.28	0.22	0.16	0.16	0.28	-6.36	1	1	1	1	1	1	1	3.293e-07
		690563	230419	168870	191832	370824	307373	236996	644321	661141	1.58	2.03	1.85	0.9	1.17	1.54	0.1	0.06	0.999686	0.999326	0.99944	0.990737	0.9447	1	1	0.99999
[Similar to: C-12 NBD-dihydro-ceramide; ΔMass: -29.8510 Da]	C42 H81 N O2	3.52657e+06	749938	538313	508323	1.30325e+06	1.43618e+06	1.65799e+06	3.87178e+06	2.13065e+06	2.23	2.71	2.79	1.44	1.3	1.09	-0.13	0.73	0.483355	0.206802	0.178596	0.849391	0.949228	0.995886	0.58651	0.999954
[Similar to: (4-benzoylpiperidino)[4-(tert-butyl)phenyl]methanone; ΔMass: 38.0306 Da]	C22 H33 N3 O S	7976.75	6535.97	5504.44	6112.72	8007.06	8839.01	8298.83	6809.86	2.40502e+06	0.29	0.54	0.38	-0.01	-0.15	-0.06	0.23	-8.24	1	1	1	1	1	1	1	1.71712e-05
		4.29594e+06	868094	434086	878003	1.76604e+06	1.75468e+06	2.04667e+06	3.74574e+06	4.06055e+06	2.31	3.31	2.29	1.28	1.29	1.07	0.2	0.08	0.535451	0.28892	0.411847	0.998202	1	0.98623	0.99834	0.999863
	C65 H85 N3 O5	16563.1	15862.1	15359	15748.6	16733.9	16678.4	15879.9	15866.4	1.71768e+06	0.06	0.11	0.07	-0.01	-0.01	0.06	0.06	-6.7	1	1	1	1	1	1	1	0.00266745
	C33 H41 N O6	12046.7	11247.6	10792.4	11286.3	13749.9	13582.1	13773.6	11982	4.82108e+06	0.1	0.16	0.09	-0.19	-0.17	-0.19	0.01	-8.64	1	1	1	1	1	1	1	1.23506e-06
	C29 H63 N4 O3 P	1.50834e+06	479026	400942	409159	685674	538858	512589	1.4356e+06	1.41103e+06	1.65	1.91	1.88	1.14	1.48	1.56	0.07	0.1	0.996781	0.994733	0.99473	0.99582	0.790059	1	1	1
	C44 H84 N2 O7 S	5.4652e+06	4.81905e+06	3.39409e+06	2.92349e+06	4.38095e+06	4.72348e+06	4.34608e+06	5.52051e+06	2.34761e+06	0.18	0.69	0.9	0.32	0.21	0.33	-0.01	1.22	0.988585	0.403134	0.125473	0.962497	0.998919	0.892546	0.999568	0.00908963
[Similar to: (1S,8S,9S,10S,13R)-6,9,10-trimethyl-2-oxo-4,14-dioxatetracyclo[7.5.0.0Âa,ÂaÂl.0Âl,â·]tetradeca-3(7),5-dien-8-yl acetate; ΔMass: 242.2617 Da]	C33 H54 O6	5.12264e+06	3.36843e+06	2.69387e+06	2.86771e+06	2.23602e+06	2.60438e+06	3.39915e+06	5.44341e+06	787904	0.6	0.93	0.84	1.2	0.98	0.59	-0.09	2.7	0.13246	0.00633241	0.0188684	0.00103187	0.00187206	0.00849752	0.997589	1.21075e-08
[Similar to: Palmitoyl sphingomyelin; ΔMass: 145.0765 Da]	C44 H91 N5 O6 P2	7.39841e+06	1.43829e+06	922582	549820	3.73788e+06	3.26022e+06	4.04911e+06	1.90589e+07	4.73687e+06	2.36	3	3.75	0.98	1.18	0.87	-1.37	0.64	0.201759	0.087091	0.0623723	0.605721	0.659566	0.850131	0.000566672	1
LysoPC(22:5(7Z,10Z,13Z,16Z,19Z))	C30 H52 N O7 P	5.90543e+06	1.1673e+06	523312	288269	9.7567e+06	1.0146e+07	5.59469e+06	5.10308e+06	2.75151e+06	2.34	3.5	4.36	-0.72	-0.78	0.08	0.21	1.1	0.118495	0.0452205	0.0318893	0.398068	0.540511	1	0.999983	0.902158
		1.49629e+06	278854	302738	255471	573560	426142	612355	1.53591e+06	1.3909e+06	2.42	2.31	2.55	1.38	1.81	1.29	-0.04	0.11	0.995846	0.992631	0.996159	0.997728	0.984737	1	1	0.99958
[Similar to: 2-(4-Methoxyphenyl)-5-{(3S)-1-[(4-methylphenyl)sulfonyl]-3-pyrrolidinyl}-1,3,4-oxadiazole; ΔMass: 195.3604 Da]	C36 H66 O6	3.23816e+06	332508	107383	254424	1.47026e+06	1.54598e+06	1.08218e+06	2.00308e+06	1.26336e+06	3.28	4.91	3.67	1.14	1.07	1.58	0.69	1.36	0.612584	0.36386	0.405795	1	0.999995	0.961229	0.981667	0.999999
		42540.2	65759.2	73032	96920	32942.5	38513.1	36153	39278.6	42733.7	-0.63	-0.78	-1.19	0.37	0.14	0.23	0.12	-0.01	0.354083	1	1	1	1	1	1	1
SM(d18:0/14:0)	C37 H77 N2 O6 P	6.48853e+06	1.32026e+06	692751	396488	1.01635e+07	1.07734e+07	1.10439e+07	8.85005e+06	4.38493e+06	2.3	3.23	4.03	-0.65	-0.73	-0.77	-0.45	0.57	0.113138	0.0579794	0.0386218	0.990766	0.959225	0.991443	1	0.970567
1-stearoyl-2-oleoyl-sn-glycero-3-phosphocholine	C44 H86 N O8 P	9.64315e+06	3.72208e+06	2.83327e+06	810585	8.06523e+06	4.24844e+06	1.08439e+07	1.86198e+06	8.73516e+06	1.37	1.77	3.57	0.26	1.18	-0.17	2.37	0.14	0.0427992	0.0225555	0.0153149	0.311931	0.116767	0.475085	0.136796	0.774254
[Similar to: NP-017855; ΔMass: 762.5798 Da]	C75 H101 N9 O4	2.34589e+06	2.06933e+06	1.95573e+06	1.90131e+06	1.30326e+06	1.63457e+06	1.12866e+06	2.15816e+06	3.47043e+06	0.18	0.26	0.3	0.85	0.52	1.06	0.12	-0.56	0.997993	0.978401	1	0.933789	0.903841	0.50887	0.999327	0.916918
	C40 H61 N O6 S2	22268.6	24597.3	23209.2	26044	22527.5	24592.8	23147.4	24681.5	5.2787e+06	-0.14	-0.06	-0.23	-0.02	-0.14	-0.06	-0.15	-7.89	1	1	1	1	1	1	1	4.49078e-07
	C23 H51 O9 P3	777304	782976	638361	754965	528213	734513	341319	678533	431467	-0.01	0.28	0.04	0.56	0.08	1.19	0.2	0.85	0.656635	0.999995	1	0.998844	0.999894	0.997574	0.999997	0.99188
	C49 H89 N4 O5 P	5.70631e+06	5.00547e+06	3.83207e+06	3.08018e+06	4.26022e+06	4.47642e+06	4.32348e+06	6.34351e+06	2.73288e+06	0.19	0.57	0.89	0.42	0.35	0.4	-0.15	1.06	0.972327	0.350215	0.0840498	0.926493	0.885089	0.883902	0.994704	0.004942
	C53 H103 O2 P3	2.33788e+06	794392	611470	607542	1.51707e+06	1.12213e+06	1.21705e+06	1.86512e+06	2.26324e+06	1.56	1.93	1.94	0.62	1.06	0.94	0.33	0.05	0.929372	0.868541	0.885373	0.999995	0.980652	0.999952	1	1
	C41 H85 N3 O2	625478	925753	942792	910155	975887	791686	792368	622910	3.65425e+06	-0.57	-0.59	-0.54	-0.64	-0.34	-0.34	0.01	-2.55	0.999999	1	1	0.999998	0.999931	0.999681	0.998999	0.00571875
	C44 H79 N O P2	4.14541e+06	465969	184743	44227.7	2.39442e+06	3.57447e+06	4.71081e+06	6.57231e+06	2.32417e+06	3.15	4.49	6.55	0.79	0.21	-0.18	-0.66	0.83	0.177862	0.12653	0.10462	0.960594	0.993392	0.999987	0.889479	0.999839
	C39 H71 N5 O2	4.03623e+06	480846	570769	90267.4	2.52198e+06	2.20218e+06	1.72612e+06	3.32448e+06	1.18032e+06	3.07	2.82	5.48	0.68	0.87	1.23	0.28	1.77	0.46105	0.287931	0.202454	0.999994	0.999998	0.926189	0.998098	0.940042
	C39 H70 N7 O6 P	643639	47238.3	33047.7	30172.2	201657	167670	4.67433e+06	825643	453827	3.77	4.28	4.41	1.67	1.94	-2.86	-0.36	0.5	0.999881	0.999795	0.999781	0.999989	0.999995	5.45624e-08	0.999999	1
	C37 H73 N O6	1.78148e+06	1.28473e+06	2.08525e+06	1.60997e+06	1.26404e+06	1.54923e+06	1.55529e+06	1.71657e+06	1.50645e+06	0.47	-0.23	0.15	0.5	0.2	0.2	0.05	0.24	0.999307	0.950367	0.999847	0.99928	0.525101	0.999987	1	0.99999
pamaquine	C19 H29 N3 O	54109.4	6542.77	5595.46	6561.64	54373.2	68650.8	63663.7	49824.5	3.3454e+06	3.05	3.27	3.04	-0.01	-0.34	-0.23	0.12	-5.95	1	1	1	1	1	1	1	2.83036e-06
		5.17495e+06	1.27111e+06	905077	872277	2.65688e+06	2.34671e+06	2.46042e+06	3.92566e+06	4.54055e+06	2.03	2.52	2.57	0.96	1.14	1.07	0.4	0.19	0.85837	0.730578	0.766135	1	0.999805	0.998449	0.999996	0.998409
	C26 H47 N5 O2	48889.1	13450.3	12156.1	11392.6	60902.9	67462.2	27477.8	44623.4	7.71632e+06	1.86	2.01	2.1	-0.32	-0.46	0.83	0.13	-7.3	1	1	1	1	1	1	1	7.00997e-06
	C32 H61 N O2	1.13512e+07	1.36625e+06	801405	553975	1.44917e+07	1.16231e+07	9.61284e+06	9.57106e+06	5.56466e+06	3.05	3.82	4.36	-0.35	-0.03	0.24	0.25	1.03	0.0191405	0.00794847	0.00510476	0.784513	0.891949	1	0.997215	0.385936
Hecogenin	C27 H42 O4	2.71738e+06	659756	349630	203309	4.40849e+06	4.14448e+06	3.18202e+06	2.44295e+06	2.05508e+06	2.04	2.96	3.74	-0.7	-0.61	-0.23	0.15	0.4	0.208699	0.108124	0.0573088	0.272599	0.171339	0.999251	0.999947	0.995926
1-(1Z-hexadecenyl)-sn-glycero-3-phosphocholine	C24 H50 N O6 P	1.67795e+07	3.24541e+06	1.47847e+06	831547	2.24839e+07	2.13361e+07	1.32144e+07	1.45298e+07	7.56319e+06	2.37	3.5	4.33	-0.42	-0.35	0.34	0.21	1.15	0.00526652	0.00121191	0.000540639	0.2841	0.427753	1	1	0.736186
	C43 H83 N3 O3	845569	65748.9	38175.5	32730.3	440956	404731	3.66191e+06	1.64515e+06	525860	3.68	4.47	4.69	0.94	1.06	-2.11	-0.96	0.69	0.996514	0.994648	0.994414	0.999911	0.999976	4.10445e-05	0.971044	1
[Similar to: (8,9-dimethoxy-10b-methyl-1-phenyl-1,5,6,10b-tetrahydro[1,2,4]triazolo[3,4-a]isoquinolin-3-yl)(phenyl)methanone; ΔMass: -55.8497 Da]	C22 H45 N O3	843919	905425	1.06641e+06	1.44421e+06	836317	1.38194e+06	1.21399e+06	853127	1.25631e+06	-0.1	-0.34	-0.78	0.01	-0.71	-0.52	-0.02	-0.57	0.999999	1	1	0.99888	1	1	0.980008	0.999997
[Similar to: 3,5-di-tert-Butylbenzaldehyde; ΔMass: 610.4111 Da]	C48 H81 N2 O7 P	996059	1.04875e+06	894552	779017	949741	1.08327e+06	1.26467e+06	867826	2.24613e+06	-0.07	0.16	0.35	0.07	-0.12	-0.34	0.2	-1.17	0.999993	0.999991	0.999716	1	1	1	0.999935	0.351192
PC(18:3(9Z,12Z,15Z)/18:2(9Z,12Z))	C44 H78 N O8 P	4.09386e+06	1.0501e+06	776741	557427	5.35833e+06	5.77371e+06	3.61808e+06	1.18018e+07	4.22913e+06	1.96	2.4	2.88	-0.39	-0.5	0.18	-1.53	-0.05	0.423788	0.320101	0.274908	0.991022	0.999135	0.988981	0.90283	0.999996
	C42 H83 N2 O6 P	5.35236e+06	1.3228e+06	517495	227605	8.30287e+06	7.74294e+06	5.16432e+06	8.13783e+06	3.81933e+06	2.02	3.37	4.56	-0.63	-0.53	0.05	-0.6	0.49	0.116127	0.0566909	0.041418	1	1	0.99968	0.999852	0.998624
	C9 H21 N O3	103520	86649.6	45104	48804.5	77910	116906	181803	62219.1	82271.9	0.26	1.2	1.08	0.41	-0.18	-0.81	0.73	0.33	0.955998	0.898648	0.913637	0.965978	0.999993	0.964775	0.992828	0.825114
	C41 H90 N5 O5 P	1.57513e+06	596236	700953	675914	863908	876410	900956	1.6644e+06	1.48127e+06	1.4	1.17	1.22	0.87	0.85	0.81	-0.08	0.09	0.992268	0.993146	0.992619	0.997869	0.901592	0.999998	1	1
	C47 H74 N7 O3 P S	1.22937e+07	3.90445e+06	2.67139e+06	1.40346e+06	1.13051e+07	1.13638e+07	1.15873e+07	1.63078e+07	1.15195e+07	1.65	2.2	3.13	0.12	0.11	0.09	-0.41	0.09	0.0140817	0.000424766	2.81434e-05	0.999649	0.999461	0.999999	0.726849	0.999984
[Similar to: NP-013366; ΔMass: 166.1986 Da]	C40 H81 N5 O6 P2	3.53309e+06	468181	407631	239467	1.37225e+06	1.59959e+06	1.18479e+06	7.75557e+06	2.76382e+06	2.92	3.12	3.88	1.36	1.14	1.58	-1.13	0.35	0.550704	0.628314	0.450015	0.949992	0.987888	0.918241	0.132694	1
	C82 H150 N10 O3	1.76048e+06	769089	236759	192425	547344	872541	1.30404e+06	3.31471e+06	2.6975e+06	1.19	2.89	3.19	1.69	1.01	0.43	-0.91	-0.62	0.999998	0.943471	0.953309	0.988061	0.994838	0.999971	0.633723	0.201255
[Similar to: Palmitoyl sphingomyelin; ΔMass: 128.1198 Da]	C51 H97 N2 P3	7.41361e+06	1.53739e+06	972312	512621	6.1643e+06	7.12826e+06	9.96481e+06	1.59024e+07	6.72576e+06	2.27	2.93	3.85	0.27	0.06	-0.43	-1.1	0.14	0.0656396	0.0278724	0.0183237	0.74419	0.907409	0.999987	0.741307	0.999995
	C32 H59 N O6	26382.6	25107.3	23907.6	24033	23888.1	24518.1	25794	24453	3.45553e+06	0.07	0.14	0.13	0.14	0.11	0.03	0.11	-7.03	1	1	1	1	1	1	1	3.34356e-05
	C50 H92 N2 O8	4.02052e+06	1.15669e+06	785177	883459	1.86304e+06	1.70616e+06	1.89343e+06	3.18521e+06	3.98388e+06	1.8	2.36	2.19	1.11	1.24	1.09	0.34	0.01	0.90322	0.822596	0.820643	1	1	1	1	0.999999
[truncated: 136 more rows]

## Sheet: LIPID (ESI-)
Name	Group Area: Control (1)	Group Area: 1:5 Dilution (2)	Group Area: 1:10 Dilution (3)	Group Area: 1:20 Dilution (4)	Group Area: 2x F/T (5)	Group Area: 3x F/T (6)	Group Area: Blood Staining (7)	Group Area: Hyaluronidase Treated (8)	Group Area: Bead Beating (9)	Log2 Fold Change: (1) / (2)	Log2 Fold Change: (1) / (3)	Log2 Fold Change: (1) / (4)	Log2 Fold Change: (1) / (5)	Log2 Fold Change: (1) / (6)	Log2 Fold Change: (1) / (7)	Log2 Fold Change: (1) / (8)	Log2 Fold Change: (1) / (9)	P-value: (1) / (2)	P-value: (1) / (3)	P-value: (1) / (4)	P-value: (1) / (5)	P-value: (1) / (6)	P-value: (1) / (7)	P-value: (1) / (8)	P-value: (1) / (9)
[truncated: 839 more rows]

[truncated: 2 more sheets: HILIC (ESI+), HILIC (ESI-)]
